# Supplementary material for: Chlamydiae Has Contributed at Least 55 Genes to Plantae with Predominantly Plastid Functions
Source: PubMed Central journal article supplement (PMC2376095; doi:10.1371/journal.pone.0002205), 2008-05-21
Supplement: pone.0002205.s001.pdf [file pone.0002205.s001.pdf]

| Tree ID                                          | Database   | Accession | Annotation                                                                                                                                        | Arabidopsis homolog                                                                                                                               | Accession | Chlamydiae homolog                                                       | Accession | Bootstrap | Plantae |                             | WolF       | PSORT      | TargetP    | Predator    | ChloroP     | PSLDoc | Prediction | UEW25 |
|--------------------------------------------------|------------|-----------|---------------------------------------------------------------------------------------------------------------------------------------------------|---------------------------------------------------------------------------------------------------------------------------------------------------|-----------|--------------------------------------------------------------------------|-----------|-----------|---------|-----------------------------|------------|------------|------------|-------------|-------------|--------|------------|-------|
|                                                  |            |           |                                                                                                                                                   |                                                                                                                                                   |           |                                                                          |           |           | distn.  | str.                        |            |            |            |             |             |        |            |       |
| Plantae-Arabidopsis_thaliana_15220982            | GenBank    | 15220982  | PFCE1 (PALEFACE 1)                                                                                                                                | PFCE1 (PALEFACE 1)                                                                                                                                | 15220982  | dimethyladenosine transferase                                            | 161611309 | 75        | G       | chlo: 10.0                  | mito: 0.97 | chlo: 0.59 | chlo: 0.51 | chlo: 0.67  | Chloroplast |        | Y          |       |
| Plantae-Arabidopsis_thaliana_15225451            | GenBank    | 15225451  | GAS4 (UDP-D-GLUCURONATE 4-EPIMERASE 4); catalytic KAS 1 (3-KETOACYL-ACYL CARRIER PROTEIN SYNTHASE 1); fatty-acid synthase                         | EPIMERASE 4; catalytic KAS 1 (3-KETOACYL-ACYL CARRIER PROTEIN SYNTHASE 1); fatty-acid synthase                                                    | 15225451  | probable UDP-glucuronate epimerase                                       | 46445713  | 75        | GR      | chlo: 2.0                   | none: 0.85 | none: 0.97 | chlo: 0.54 | chlo: 0.13  | Chloroplast |        | Y          |       |
| Plantae-Arabidopsis_thaliana_15237422            | GenBank    | 15237422  | Exonuclease family protein                                                                                                                        | Exonuclease family protein                                                                                                                        | 15237422  | 3-oxoacyl (acyl carrier protein) synthase II                             | 46446872  | 75        | GR      | chlo: 9.5<br>chlo_mito: 5.8 | chlo: 0.89 | chlo: 0.54 | chlo: 0.58 | chlo: 0.82  | Chloroplast |        | Y          |       |
| Plantae-Arabidopsis_thaliana_15240411            | GenBank    | 15240411  | ISPD (2-C-METHYL-D-ERYTHRITOL 4-PHOSPHATE CYTIDYLTRANSFERASE) MOD1 (MOSAIC DEATH 1); enoyl-[acyl-carrier-protein] reductase (NADH) oxidoreductase | ISPD (2-C-METHYL-D-ERYTHRITOL 4-PHOSPHATE CYTIDYLTRANSFERASE) MOD1 (MOSAIC DEATH 1); enoyl-[acyl-carrier-protein] reductase (NADH) oxidoreductase | 15240411  | putative 4-diphosphocytidyl-2C-methyl-D-erythritol synthase              | 46445961  | 75        | GRC     | chlo: 13.0                  | mito: 0.26 | chlo: 0.5  | chlo: 0.53 | mito: 0.47  | Chloroplast |        | Y          |       |
| Plantae-Arabidopsis_thaliana_18396215            | GenBank    | 18396215  | Unknown protein (contains nucleotide-diphospho-sugar transferases domain)                                                                         | Unknown protein (contains nucleotide-diphospho-sugar transferases domain)                                                                         | 18396215  | enoyl-[acyl carrier protein] reductase                                   | 46446766  | 75        | GC      | chlo: 11.0                  | chlo: 0.89 | chlo: 0.91 | chlo: 0.55 | chlo: 0.37  | Chloroplast |        | N          |       |
| Plantae-Arabidopsis_thaliana_18410414            | GenBank    | 18410414  | AGD2 (ABERRANT GROWTH AND DEATH 2); transaminase                                                                                                  | AGD2 (ABERRANT GROWTH AND DEATH 2); transaminase                                                                                                  | 18410414  | hypothetical protein pc0324                                              | 46445958  | 75        | G       | chlo: 7.0                   | chlo: 0.95 | chlo: 0.63 | chlo: 0.59 | chlo: 0.06  | Chloroplast |        | Y          |       |
| Plantae-Arabidopsis_thaliana_18418270            | GenBank    | 18418270  | ATSA3/ISA3 (ISOAMYLASE 3); alpha-amylase                                                                                                          | ATSA3/ISA3 (ISOAMYLASE 3); alpha-amylase                                                                                                          | 18418270  | probable isomylase                                                       | 46445740  | 75        | GR      | chlo: 11.5                  | chlo: 0.98 | chlo: 0.67 | chlo: 0.59 | chlo: 0.14  | Chloroplast |        | Y          |       |
| Plantae-Arabidopsis_thaliana_22328517            | GenBank    | 22328517  | Methylase-related                                                                                                                                 | Methylase-related                                                                                                                                 | 30684961  | hypothetical protein pc1620                                              | 46447254  | 50        | GR      | chlo: 6.0                   | chlo: 0.83 | chlo: 0.79 | chlo: 0.55 | chlo: 0.07  | Chloroplast |        | N          |       |
| Plantae-Arabidopsis_thaliana_30687794            | GenBank    | 30687794  | Pseudouridine synthase family protein                                                                                                             | Pseudouridine synthase family protein                                                                                                             | 30687794  | putative ribosomal large chain pseudouridine synthase B                  | 46445794  | 75        | G       | chlo: 11.0                  | chlo: 0.68 | chlo: 0.97 | chlo: 0.57 | nud: 0.14   | Chloroplast |        | N          |       |
| Plantae-Arabidopsis_thaliana_30688378            | GenBank    | 30688378  | PHT2.1 (phosphate transporter 2.1) tRNA/rRNA methyltransferase                                                                                    | PHT2.1 (phosphate transporter 2.1) tRNA/rRNA methyltransferase                                                                                    | 30688378  | Phosphate Permease                                                       | 15618550  | 75        | G       | chlo: 8.0                   | none: 0.45 | none: 0.99 | chlo: 0.50 | mito: 0.01  | Chloroplast |        | Y          |       |
| Plantae-Arabidopsis_thaliana_30691669            | GenBank    | 30691669  | (SpoU) family protein                                                                                                                             | (SpoU) family protein                                                                                                                             | 30691669  | hypothetical protein pc0141                                              | 46445775  | 75        | GC      | chlo: 12.0                  | none: 0.25 | none: 0.86 | chlo: 0.79 | Chloroplast |             | Y      |            |       |
| Plantae-Arabidopsis_thaliana_30697049            | GenBank    | 30697049  | Malate dehydrogenase (NADP) Phosphoglycerate/bisphosphoglycerate mutase family protein                                                            | Malate dehydrogenase (NADP) Phosphoglycerate/bisphosphoglycerate mutase family protein                                                            | 30697049  | malate dehydrogenase                                                     | 46447406  | 75        | G       | chlo: 12.0                  | chlo: 0.96 | chlo: 0.78 | chlo: 0.56 | chlo: 0.00  | Chloroplast |        | N          |       |
| Plantae-Arabidopsis_thaliana_42563306            | GenBank    | 42563306  | Unknown protein (contains domain 5-adenosyl-L-methionine-dependent methyltransferases)                                                            | Unknown protein (contains domain 5-adenosyl-L-methionine-dependent methyltransferases)                                                            | 42563306  | phosphoglyceromutase                                                     | 46445795  | 75        | G       | chlo: 11.0                  | chlo: 0.86 | chlo: 0.75 | chlo: 0.56 | nud: 0.49   | Chloroplast |        | Y          |       |
| Plantae-Arabidopsis_thaliana_42565237            | GenBank    | 42565237  | PA2 (PHOSPHORIBOSYLANTHRANILATE ISOMERASE 2); phosphoribosylanthranilate isomerase                                                                | PA2 (PHOSPHORIBOSYLANTHRANILATE ISOMERASE 2); phosphoribosylanthranilate isomerase                                                                | 42565237  | methyltransferase                                                        | 46447632  | 75        | GC      | chlo: 5.0                   | chlo: 0.84 | chlo: 0.77 | chlo: 0.56 | cyto: 0.22  | Chloroplast |        | Y          |       |
| Plantae-Arabidopsis_thaliana_42573275            | GenBank    | 42573275  | CAZ (BETA CARBONIC ANHYDRASE 2); carbonate dehydratase/ zinc ion binding                                                                          | CAZ (BETA CARBONIC ANHYDRASE 2); carbonate dehydratase/ zinc ion binding                                                                          | 42573275  | isomerase                                                                | 13835220  | 75        | G       | chlo: 13.0                  | chlo: 0.83 | none: 0.85 | chlo: 0.56 | chlo: 0.72  | Chloroplast |        | N          |       |
| Plantae-Arabidopsis_thaliana_42573371            | GenBank    | 42573371  | RNA synthetase class I (W and Y) family protein                                                                                                   | RNA synthetase class I (W and Y) family protein                                                                                                   | 42573371  | cyt                                                                      | 46446692  | 75        | X       | cyto: 6.0                   | none: 0.67 | chlo: 0.52 | chlo: 0.54 | chlo: 0.97  | Chloroplast |        | Y          |       |
| Plantae-Chlamydomonas_reinhardtii_139405         | JGI        | 139405    | Aminoacyl-tRNA synthetase, class II                                                                                                               | Aminoacyl-tRNA synthetase, class II                                                                                                               | 15222946  | probable tyrosine-tRNA ligase                                            | 46445963  | 75        | GR      | chlo: 13.0                  | chlo: 0.86 | chlo: 0.84 | chlo: 0.58 | chlo: 0.62  | Chloroplast |        | Y          |       |
| Plantae-Chlamydomonas_reinhardtii_155608         | JGI        | 155608    | Conserved hypothetical protein                                                                                                                    | YesC-related                                                                                                                                      | 18400553  | hypothetical protein CP0573                                              | 15618484  | 75        | GRC     | chlo: 8.0                   | chlo: 0.58 | chlo: 0.45 | chlo: 0.57 | chlo: 0.16  | Chloroplast |        | N          |       |
| Plantae-Chlamydomonas_reinhardtii_503            | JGI        | 503       | Granule-bound starch synthase I (glycosyl transferase)                                                                                            | Starch synthase                                                                                                                                   | 15223131  | glycogen synthase                                                        | 46447230  | 75        | G       | chlo: 13.0                  | chlo: 0.91 | chlo: 0.92 | chlo: 0.56 | chlo: 0.10  | Chloroplast |        | Y          |       |
| Plantae-Cyanidioschyzon_merolae_CMO211C          | C. merolae | CMO211C   | Conserved hypothetical protein                                                                                                                    | Unknown protein                                                                                                                                   | 15238214  | hypothetical protein pc1708                                              | 46447342  | 75        | RC      | chlo: 11.0                  | mito: 0.60 | ER: 0.48   | chlo: 0.74 | Chloroplast |             | Y      |            |       |
| Plantae-Cyanidioschyzon_merolae_CMR313C          | C. merolae | CMR313C   | Oligonucleotidase F                                                                                                                               | ADP/ATP translocase                                                                                                                               | 15238214  | putative oligonucleotidase F                                             | 46445812  | 50        | R       | chlo: 12.0                  | chlo: 0.77 | mito: 0.62 | chlo: 0.58 | chlo: 0.17  | Chloroplast |        | Y          |       |
| Plantae-Oryza_sativa_115438861                   | GenBank    | 115438861 | Plasticidic ATP/ADP transporter                                                                                                                   | ADP/ATP translocase                                                                                                                               | 15238214  | ADP/ATP Translocase                                                      | 15604784  | 75        | G       | plas: 10.0                  | mito: 0.45 | none: 0.78 | chlo: 0.50 | chlo: 0.76  | Chloroplast |        | N          |       |
| Plantae-Oryza_sativa_115460026                   | GenBank    | 115460026 | Copper/Zinc superoxide dismutase family protein                                                                                                   | CCS1 (copper chaperone for superoxide dismutase 1); superoxide dismutase copper chaperone                                                         | 145335439 | putative Superoxide dismutase (Cu-Zn)                                    | 46447393  | 75        | GCX     | chlo: 6.0                   | none: 0.87 | none: 0.98 | cyto: 0.66 | Chloroplast |             | Y      |            |       |
| Plantae-Oryza_sativa_115463187                   | GenBank    | 115463187 | Rhodanese-like domain containing protein                                                                                                          | Rhodanese-like domain-containing protein                                                                                                          | 18409495  | hypothetical protein CCA00010                                            | 29839779  | 75        | GC      | chlo: 9.5                   | mito: 0.58 | mito: 0.47 | chlo: 0.56 | chlo: 0.40  | Chloroplast |        | N          |       |
| Plantae-Oryza_sativa_115470767                   | GenBank    | 115470767 | Polyribonucleotide phosphorylase                                                                                                                  | polynucleotide                                                                                                                                    | 30678905  | phosphorylase/polyadenylase                                              | 46446277  | 75        | GRC     | chlo: 14.0                  | chlo: 0.97 | none: 0.86 | chlo: 0.57 | chlo: 0.60  | Chloroplast |        | N          |       |
| Plantae-Oryza_sativa_115474235                   | GenBank    | 115474235 | D-alanine-D-alanine ligase B glycerol-3-phosphate acyltransferase                                                                                 | D-alanine-D-alanine ligase family glycerol-3-phosphate acyltransferase                                                                            | 45273225  | putative D-alanine-D-alanine ligase glycerol-3-phosphate acyltransferase | 46446032  | 75        | G       | chlo: 4.0                   | none: 0.65 | chlo: 0.63 | chlo: 0.50 | chlo: 0.35  | Chloroplast |        | Y          |       |
| Plantae-Oryza_sativa_115483650                   | GenBank    | 115483650 | AT51 (ACYLTRANSFERASE 1) ATCDPMEK (PIGMENT DEFECTIVE 27); 4-(cytidine 5'-diphospho)-2-C-methyl-D-erythritol kinase                                | AT51 (ACYLTRANSFERASE 1) ATCDPMEK (PIGMENT DEFECTIVE 27); 4-(cytidine 5'-diphospho)-2-C-methyl-D-erythritol kinase                                | 15222600  | acetyltransferase                                                        | 76789550  | 75        | GRC     | chlo: 14.0                  | chlo: 0.68 | chlo: 0.94 | chlo: 0.59 | chlo: 0.92  | Chloroplast |        | Y          |       |
| Plantae-Ostreococcus_tauri_21840                 | JGI        | 21840     | 4-diphosphocytidyl-2C-methyl-D-erythritol kinase                                                                                                  | probable isopentenyl monophosphate kinase (IPK)                                                                                                   | 15225820  | probable 3-deoxy-manno-oxulosone synthase                                | 46447223  | 75        | GC      | chlo: 13.0                  | chlo: 0.79 | chlo: 0.95 | chlo: 0.58 | chlo: 0.90  | Chloroplast |        | Y          |       |
| Plantae-Ostreococcus_tauri_37113                 | JGI        | 37113     | Cytidylyltransferase family Putative SAM dependent methyltransferases                                                                             | cytidylyltransferase family                                                                                                                       | 30695303  | cytidylyltransferase                                                     | 89898215  | 75        | G       | chlo: 11.0                  | chlo: 0.61 | none: 0.77 | chlo: 0.50 | chlo: 0.35  | Chloroplast |        | N          |       |
| Plantae-Ostreococcus_tauri_8662                  | JGI        | 8662      | Unknown protein                                                                                                                                   | msrW methylase family protein                                                                                                                     | 15238896  | methyltransferase                                                        | 46445945  | 75        | G       | chlo: 11.0                  | chlo: 0.67 | mito: 0.63 | chlo: 0.53 | chlo: 0.40  | Chloroplast |        | Y          |       |
| Plantae-Physcomitrella_patens_218794             | JGI        | 218794    | Pyrophosphate-dependent phosphofruktokinase PfpB                                                                                                  | pyrophosphate-fructose-6-phosphate 1-phosphotransferase beta subunit, putative / pyrophosphate-dependent 6-phosphofruktokinase-1-kinase, putative | 15221156  | diphosphate-fructose-6-phosphate 1-phosphotransferase                    | 46449514  | 75        | GC      | chlo: 8.0                   | chlo: 0.59 | chlo: 0.63 | cyto: 0.31 | Chloroplast |             | N      |            |       |
| Plantae-Physcomitrella_patens_219372             | JGI        | 219372    | Anthraniolate phosphoribosyl transferase                                                                                                          | anthranilate phosphoribosyltransferase                                                                                                            | 15238711  | phosphoribosyltransferase                                                | 89898246  | 75        | GRC     | chlo: 11.0                  | chlo: 0.81 | chlo: 0.9  | chlo: 0.56 | chlo: 0.64  | Chloroplast |        | N          |       |
| Plantae-Physcomitrella_patens_55802              | JGI        | 55802     | 4-hydroxy-3-methylbut-2-en-1-yl diphosphate synthase                                                                                              | 4-hydroxy-3-methylbut-2-en-1-yl diphosphate synthase                                                                                              | 30697395  | probable gcp2 protein                                                    | 46446374  | 75        | GC      | chlo: 9.0                   | chlo: 0.81 | chlo: 0.79 | chlo: 0.53 | chlo: 0.42  | Chloroplast |        | Y          |       |
| Plantae-Physcomitrella_patens_69001              | JGI        | 69001     | Sodium sulfate symporter and related arsenite permeases                                                                                           | ATHND1 (Arabidopsis thaliana Na/H antiporter 1); sodium/sulfate antiporter                                                                        | 18402524  | Na <sup>+</sup> /H <sup>+</sup> antiporter, putative                     | 16752011  | 75        | GRC     | chlo: 11.5                  | chlo: 0.95 | chlo: 0.83 | chlo: 0.58 | mito: 0.06  | Chloroplast |        | N          |       |
| Plantae-Arabidopsis_thaliana_15235511            | GenBank    | 15235511  | HMA1 (Heavy metal ATPase 1); copper-exporting ATPase                                                                                              | HMA1 (Heavy metal ATPase 1); copper-exporting ATPase                                                                                              | 15235511  | membrane protein                                                         | 62185460  | 75        | GRX     | plas: 7.0                   | mito: 0.84 | none: 0.68 | chlo: 0.54 | chlo: 0.77  | Chloroplast |        | N          |       |
| Plantae-Arabidopsis_thaliana_15236554            | GenBank    | 15236554  | S05 ribosomal protein-related                                                                                                                     | S05 ribosomal protein-related MSD1 (MANGANESE SUPEROXIDE DISMUTASE 1); manganese superoxide dismutase                                             | 15236554  | S05 ribosomal protein L25/general stress protein Ctc                     | 76789542  | 50        | G       | mito: 10.0                  | mito: 0.74 | mito: 0.84 | cyto: 0.08 | on          |             |        |            |       |
| Plantae-Chlamydomonas_reinhardtii_196649         | JGI        | 196649    | Manganese and iron superoxide dismutase                                                                                                           | superoxide dismutase                                                                                                                              | 15228407  | superoxide dismutase                                                     | 166154505 | 75        | RC      | nud: 7.0                    | none: 0.51 | ER: 0.77   | chlo: 0.57 | on          |             |        |            |       |
| Plantae-Ostreococcus_tauri_18978                 | JGI        | 18978     | Queuine tRNA-ribosyltransferase                                                                                                                   | queuine tRNA-ribosyltransferase                                                                                                                   | 46446428  | queuine tRNA-ribosyltransferase                                          | 46446428  | 75        | GRC     | mito: 12.5                  | mito: 0.64 | mito: 0.67 | chlo: 0.85 | on          |             |        |            |       |
| Plantae-Arabidopsis_thaliana_18408421            | GenBank    | 18408421  | permease, putative PIP3C (PLASMA MEMBRANE INTRINSIC PROTEIN 13); water channel                                                                    | permease, putative PIP3C (PLASMA MEMBRANE INTRINSIC PROTEIN 13); water channel                                                                    | 18408421  | probable regulatory protein uhpC                                         | 46446021  | 75        | G       | plas: 9.0                   | none: 0.92 | none: 0.97 | chlo: 0.03 | Membrane    |             | N      |            |       |
| Plantae-Arabidopsis_thaliana_15223438            | GenBank    | 15223438  | putative channel                                                                                                                                  | putative tonoplast intrinsic protein channel                                                                                                      | 15223438  | (Aquaporin)                                                              | 46446430  | 75        | G       | plas: 12.0                  | none: 0.94 | none: 0.99 | plas: 0.93 | Membrane    |             | Y      |            |       |
| Chromalveolata-Aureococcus_anophagefferens_65597 | JGI        | 65597     | Prolyl 4-hydroxylase, alpha subunit                                                                                                               | Unknown protein                                                                                                                                   | 15219261  | hypothetical protein pc1581                                              | 46447215  | 75        | GC      | nud: 8.0                    | none: 0.81 | none: 0.99 | nud: 0.95  | extension   |             | Y      |            |       |
| Plantae-Arabidopsis_thaliana_15219361            | GenBank    | 15219361  | Unknown protein                                                                                                                                   | Sugar isomerase (SIS) domain-containing protein                                                                                                   | 15219361  | hypothetical protein pc0850                                              | 46446484  | 75        | G       | nud: 10.0                   | none: 0.86 | none: 0.99 | nud: 0.63  | Y           |             |        |            |       |
| Plantae-Arabidopsis_thaliana_15232565            | GenBank    | 15232565  | Unknown protein                                                                                                                                   | Unknown protein                                                                                                                                   | 15232565  | putative Gut Q protein                                                   | 46447416  | 75        | G       | nud: 7.5                    | none: 0.83 | none: 0.96 | chlo: 0.50 | Y           |             |        |            |       |
| Plantae-Arabidopsis_thaliana_15237589            | GenBank    | 15237589  | SAL2; 3(2),5'-bisphosphate nucleotidase/inositol or phosphatidylinositol phosphatase                                                              | SAL2; 3(2),5'-bisphosphate nucleotidase/inositol or phosphatidylinositol phosphatase                                                              | 15237589  | putative sulfur metabolism-related protein                               | 62185419  | 75        | GRC     | ER: 5.0                     | none: 0.26 | none: 0.99 | chlo: 0.17 | N           |             |        |            |       |
| Plantae-Arabidopsis_thaliana_18396238            | GenBank    | 18396238  | Unknown protein (similar to zinc finger family protein)                                                                                           | Unknown protein (similar to zinc finger family protein)                                                                                           | 18396238  | hypothetical protein pc1119                                              | 46446763  | 75        | G       | nud: 10.0                   | none: 0.52 | none: 0.89 | chlo: 0.50 | golgi: 0.10 |             |        |            |       |
| Plantae-Arabidopsis_thaliana_30687613            | GenBank    | 30687613  | ATPT9 (Arabidopsis thaliana isopentenyltransferase 9); ATP binding / tRNA isopentenyltransferase                                                  | ATPT9 (Arabidopsis thaliana isopentenyltransferase 9); ATP binding / tRNA isopentenyltransferase                                                  | 30687613  | tRNA delta(2)-isopentenylpyrophosphate transferase                       | 46446877  | 75        | GRC     | chlo: 7.5                   | mito: 0.75 | mito: 0.48 | chlo: 0.51 | nud: 0.80   | N           |        |            |       |
| Plantae-Chlamydomonas_reinhardtii_104193         | JGI        | 104193    | Dihydrouridine synthase, DUs RNA-binding region containing protein                                                                                | Dihydrouridine synthase family protein                                                                                                            | 15234862  | putative protein involved in RNA-protein                                 | 46447213  | 75        | G       | nud: 13.0                   | none: 0.94 | none: 0.98 | nud: 0.84  | Y           |             |        |            |       |
| Plantae-Oryza_sativa_115452347                   | GenBank    | 115452347 | Lipote protein ligase-like protein                                                                                                                | RNA recognition motif (RRM)-containing protein                                                                                                    | 15232979  | probable nucleic acid-binding protein                                    | 46446527  | 75        | G       | nud: 12.0                   | none: 0.97 | none: 0.97 | mito: 0.03 | Y           |             |        |            |       |
| Plantae-Oryza_sativa_115476574                   | GenBank    | 115476574 | Lipote protein ligase-like protein                                                                                                                | Unknown protein                                                                                                                                   | 15228560  | putative lipote-protein ligase                                           | 46447472  | 75        | GC      | cyto: 9.0                   | none: 0.87 | none: 0.98 | chlo: 0.18 | Y           |             |        |            |       |
| Plantae-Ostreococcus_lucimarinus_31465           | JGI        | 31465     | FOG_PPR repeat                                                                                                                                    | Pentatricopeptide (PPR) repeat-containing protein                                                                                                 | 15222150  | RNA [guanine-N(7)]-methyltransferase                                     | 62185355  | 75        | GC      | cyto: 9.0                   | none: 0.73 | none: 0.99 | chlo: 0.02 | N           |             |        |            |       |
| Plantae-Ostreococcus_tauri_31283                 | JGI        | 31283     | Predicted nucleic acid-binding protein ASMTL                                                                                                      |                                                                                                                                                   |           |                                                                          |           |           |         |                             |            |            |            |             |             |        |            |       |
