# Supplementary material for: Chlamydiae Has Contributed at Least 55 Genes to Plantae with Predominantly Plastid Functions
Source: PubMed Central journal article supplement (PMC2376095; doi:10.1371/journal.pone.0002205), 2008-05-21
Supplement: pone.0002205.s002.pdf [file pone.0002205.s002.pdf]

**Table S2.** The 55 RAxML bootstrap trees that were identified by our phylogenomic analysis to support the monophyly of Chlamydiae and Plantae (with or without chromalveolates). The tree ID (see Table S1) precedes each tree.

Chromalveolata-Aureococcus\_anophagefferens\_65597  
 (((Rhizaria-Bigelowiella\_natans\_DR040100\_1:0.72724206751884379329,(Plantae-Volvox\_carteri\_88147\_jgi:2.48901170768315482817,(Chromalveolata-Aureococcus\_anophagefferens\_16893:0.46299704618489145869,(Plantae-Ostreococcus\_lucimarinus\_92186:0.65128835950455521431,Chromalveolata-Phytophthora\_sojae\_131183:0.70796421820002231051)68:0.24663111912030225015)88:1.29031286259221977808)53:0.93860528452842373337)18:0.11803334696593120734,((Chromalveolata-Paramecium\_tetraurelia\_124427262:0.00000121823947223981,Chromalveolata-Paramecium\_tetraurelia\_124393186:0.03857124897277592473)90:0.21417203907242679528,Chlamydia-Candidatus\_Protochlamydia\_46447215:4.26671113976660887346)25:0.13366462751010307897,((Chromalveolata-Paramecium\_tetraurelia\_124416421:0.00554515469942662691,Chromalveolata-Paramecium\_tetraurelia\_124411770:0.00000121823947223981)100:0.24864645618983666209,Chromalveolata-Tetrahymena\_thermophila\_118350222:0.20529505743830500641)63:0.08439645907271642322)38:0.38687807306049093459)5:0.00842713575275412519,(((Excavata-Jakoba\_bahamiensis\_109794533\_3:0.44431278128517287529,Excavata-Naegleria\_gruberi\_45024-fgeneshHS\_pg.scaffold\_1000114:0.54962745797387013713)24:0.14710028044105155631,((Chromalveolata-Thalassiosira\_pseudonana\_2190:0.98114433124445010748,((Chromalveolata-Phytophthora\_sojae\_158858:0.33770456369476825609,Chromalveolata-Aureococcus\_anophagefferens\_65597:0.37787471851945414469)85:0.07954432360397857560,Chromalveolata-Isochrysis\_galbana\_ISE00003557\_3:0.40176344105849065569)39:0.07553046064732503451)7:0.13526346014854057076,(Excavata-Giardia\_lambliia\_157434715:0.00000121823947223981,Excavata-Giardia\_lambliia\_159112778:0.00000121823947223981)99:0.89158333844675108359)0:0.00352602529421938661)5:0.09889030710058813178,(Chromalveolata-Karenia\_brevis\_Kb\_AUAO\_B\_77772\_3:0.70810630266416207945,Plantae-Volvox\_carteri\_90652\_jgi:0.70435779615160931666)28:0.12835105389802867193)16:0.12877910973152320584,Chromalveolata-Aureococcus\_anophagefferens\_66530:3.33756598858181963152);

Plantae-Arabidopsis\_thaliana\_15219361  
 (Plantae-Arabidopsis\_thaliana\_15219361:0.22724140108382268055,(Plantae-Physcomitrella\_patens\_183222:0.56910705899345537251,(Bacteria-Geobacter\_sp.\_110600188:0.55751803908851116365,(Chlamydia-Candidatus\_Protochlamydia\_46446484:0.82175508704329891518,Excavata-Naegleria\_gruberi\_52320-fgeneshHS\_pg.scaffold\_54000069:1.01884054710522153897)89:0.19670993057324157038)100:0.34868798350678809062)82:0.14028396556514940996,Plantae-Oryza\_sativa\_115444151:0.39929798345346095845);

Plantae-Arabidopsis\_thaliana\_15220982  
 (((Cyanobacteria-Synechocystis\_sp.\_PCC\_6803\_16329260:0.46430878511364293004,(((Cyanobacteria-Nodularia\_spumigena\_CCY9414\_119511388:0.07970893397303675798,(Cyanobacteria-Nostoc\_punctiforme\_PCC\_73102\_23129538:0.09597481911553663869,(Cyanobacteria-Nostoc\_sp.\_PCC\_7120\_17230721:0.03242126657370179854,Cyanobacteria-Anabaena\_variabilis\_ATCC\_29413\_75911082:0.04556992333520352295)100:0.08559577375968345503)56:0.04582518318655576239)100:0.19227918331689192177,Cyanobacteria-Lyngbya\_sp.\_PCC\_8106\_119485101:0.18394725451969443086)57:0.03738889381054830846,Cyanobacteria-Trichodesmium\_erythraeum\_IMS101\_113474554:0.27177886634745318517)61:0.05806861945551508586,(Cyanobacteria-Crocospaera\_watsonii\_WH\_8501\_67923799:0.08562000339192932241,Cyanobacteria-Cyanothece\_sp.\_CCY0110\_126657589:0.04459684422158278344)100:0.34427710788546722620)93:0.19247768789385283350)91:0.15737904808717664840,(((Bacteria-Orientia\_tsutsugamushi\_148284255:1.17665242350063015131,((Bacteria-Aurantimonas\_sp.\_90419497:0.32159846307254397191,(Bacteria-Xanthobacter\_autotrophicus\_154246772:0.22664851493933119153,(Bacteria-Methylobacterium\_sp.\_149124266:0.22896315416496096362,((Bacteria-Nitrobacter\_hamburgensis\_92117868:0.11796573649582223209,Bacteria-Rhodospseudomonas\_palustris\_90423811:0.10834386705545895335)93:0.06290914007808375008,Bacteria-Bradyrhizobium\_sp.\_146340299:0.11326271919103295116)100:0.21310216080922478321)81:0.11422355313422376255)89:0.14404337659811047856)93:0.13501964201120533748,(Bacteria-Dinoroseobacter\_shibae\_118736372:0.13238030844186238211,(((Bacteria-Jannaschia\_sp.\_89054300:0.23330036664320741302,Bacteria-Roseovarius\_sp.\_149201838:0.14303611059412973949)53:0.06013667134350776655,Bacteria-Silicibacter\_sp.\_99080785:0.09649672738532150129)12:0.02833223840423683415,((Bacteria-alpha\_proteobacterium\_114768929:0.44205442827501106873,Bacteria-

Rhodobacterales\_bacterium\_126725345:0.19933485096928013625)21:0.06365794624165822813,Bacteria-  
Roseobacter\_sp.\_126736396:0.16459090892657213256)13:0.07089847924689525460)16:0.05430080510005571431,Bacteria-  
Oceanicola\_granulosus\_89070361:0.17749527067667975055)25:0.05657635820321537529)92:0.25403324297546975297)97:0.  
24289338741831956181)96:0.34776267231038870964,Bacteria-  
Magnetococcus\_sp.\_117925614:0.65852028903220816147)30:0.18553912892364138321,((Bacteria-  
Pseudomonas\_entomophila\_104779701:0.41115674193627221866,((Bacteria-  
Haemophilus\_ducreyi\_33152288:0.72784731430408089459,Bacteria-  
Psychrobacter\_sp.\_148652714:0.54234404383271939132)44:0.07911273891967920968,Bacteria-  
Rickettsiella\_grylli\_94494115:0.69799871132032109688)48:0.10904403184195013421)94:0.29832867217959985195,Bacteria-  
Syntrophobacter\_fumaroxidans\_116750733:1.09262017166248970312)22:0.09725885892908270325)4:0.078773215572267796  
25,((((Bacteria-Actinomyces\_odontolyticus\_154509599:0.52131644555943346120,Bacteria-  
Bifidobacterium\_adolescentis\_154486326:0.44938523071680258614)88:0.23943109662295219975,Bacteria-  
Acidothermus\_cellulolyticus\_117927388:0.68627040036790365463)100:0.58345536836519429347,(((Bacteria-  
Bacteroides\_capillosus\_154498148:0.77728944038964731256,Bacteria-  
Thermoanaerobacter\_ethanolicus\_114845363:0.67934023627986006577)13:0.10002930889427169570,(((Bacteria-  
Eubacterium\_ventriosum\_154482621:0.17694070680583273703,(Bacteria-  
Ruminococcus\_torques\_153815218:0.11102587569007202339,Bacteria-  
Dorea\_longicatena\_153854785:0.13667331582185271444)82:0.08751813602147676119)100:0.25748930989399948510,Bacteri  
a-Halotheothrix\_oreni\_89209586:0.63920611787753922606)44:0.06701208181902613970,(Bacteria-  
Clostridium\_novyi\_118445093:0.45330525554947248557,Bacteria-  
Alkaliphilus\_metalliredigens\_150387987:0.32920065274388171650)84:0.12248323613508252383)28:0.0300353978483146565  
0,((Bacteria-Staphylococcus\_saprophyticus\_73663572:0.47724592725741615817,(Bacteria-  
Bacillus\_pumilus\_157690824:0.21983171639170220879,Bacteria-  
Geobacillus\_thermodenitrificans\_138893714:0.20125844699894629430)89:0.04860423816576050354)53:0.0543728640879105  
8151,(Bacteria-Listeria\_monocytogenes\_153200624:0.31634829673962322483,((Bacteria-  
Streptococcus\_pyogenes\_28895107:0.17983234185073826428,Bacteria-  
Lactococcus\_lactis\_116511486:0.24025080750535071639)100:0.24874794341054781710,(Bacteria-  
Leuconostoc\_mesenteroides\_116618707:0.54280783548235156388,(Bacteria-  
Pediococcus\_pentosaceus\_116492073:0.43301917016741603428,Bacteria-  
Lactobacillus\_johnsonii\_42518291:0.78501906879698279962)79:0.15095311081167378520)58:0.16457909867997563835)21:0  
.07135002820110798727)22:0.05382588534624331567)53:0.21027935922107621192)32:0.12479645014853216201)10:0.0368  
6840760326833694,(Bacteria-Thermosinus\_carboxydvorans\_121534378:0.42517851064985090481,Bacteria-  
Symbiobacterium\_thermophilum\_51894384:0.41352986479072489923)57:0.13567213565499672279)21:0.0690703148005046  
4245,((Bacteria-Desulfotomaculum\_reducens\_134297956:0.33782653191574074647,Bacteria-  
Pelotomaculum\_thermopropionicum\_147676415:0.38397740462597318434)62:0.07732120945889216224,Bacteria-  
Moorella\_thermoacetica\_83588925:0.46698617138170778196)36:0.07166883777000709888)17:0.13005656250132183183)8:0.  
081797647540492323255,(((Plantae-Physcomitrella\_patens\_161405:0.34557151043006006930,(Plantae-  
Oryza\_sativa\_115443901:0.64284285385453332484,Plantae-  
Arabidopsis\_thaliana\_15220982:0.14120784219439938556)97:0.31536032943207759072)100:0.49127441805984012335,(Plant  
ae-Ostreococcus\_lucimarinus\_6704:0.09149890370068532175,Plantae-  
Ostreococcus\_tauri\_5557:0.07401148692241008020)100:0.75705065552935091322)33:0.12721274816519664852,Plantae-  
Volvox\_carteri\_103245\_jgi:0.99798181289762166735)96:0.29958086998071453699,Chlamydia-  
Candidatus\_Protoclamydia\_46446029:0.76161367418664926987)93:0.26668754865937555065)4:0.05106949991074172940,((  
Chromalveolata-Aureococcus\_anophagefferens\_13505:1.03186874213741019979,Bacteria-  
Mycoplasma\_capricolum\_83319298:1.06803652746106170213)28:0.33954229585278400405,Bacteria-  
Syntrophomonas\_wolfei\_114565628:1.05181646277964313541)1:0.08375189879151631600)10:0.07844918042233962885,(Ba  
cteria-Pelobacter\_propionicus\_118580905:0.51012433158654413301,Bacteria-  
Geobacter\_sp.\_110600956:0.47755656667676049665)100:0.42618389724441668731)1:0.02815886943071267690)100:0.53889  
177089080420036,((Cyanobacteria-  
Prochlorococcus\_marinus\_str.\_AS9601\_123968460:0.02891996553954414781,(Cyanobacteria-  
Prochlorococcus\_marinus\_str.\_MIT\_9301\_126696263:0.00759699840696371510,Cyanobacteria-  
Prochlorococcus\_marinus\_str.\_MIT\_9312\_78779250:0.00709828203212395717)92:0.00771548217842576642)85:0.080388069  
05015247195,(Cyanobacteria-  
Prochlorococcus\_marinus\_subsp.\_pastoris\_str.\_CCMP1986\_33861490:0.06433002198955424522,Cyanobacteria-  
Prochlorococcus\_marinus\_str.\_MIT\_9515\_123966249:0.04247968884591959982)55:0.08456582692326682082)100:0.6718524  
1423446251385,(((Cyanobacteria-  
Prochlorococcus\_marinus\_str.\_MIT\_9303\_124023319:0.00419201031342754469,Cyanobacteria-  
Prochlorococcus\_marinus\_str.\_MIT\_9313\_33862894:0.00798495082911257481)100:0.17112389042348036261,((Cyanobacteri  
a-Synechococcus\_sp.\_RCC307\_148242414:0.28657287917397888943,Cyanobacteria-  
Synechococcus\_sp.\_WH\_8102\_33865586:0.13781370682391869131)23:0.05787002838481640488,((Cyanobacteria-  
Synechococcus\_sp.\_CC9311\_113953175:0.21320069144778641679,Cyanobacteria-  
Synechococcus\_sp.\_RS9917\_87124270:0.11465264454941545558)23:0.03750946555096288521,((Cyanobacteria-

Synechococcus\_sp\_WH\_7805\_88808454:0.08592099528890924376,Cyanobacteria-  
Synechococcus\_sp\_WH\_7803\_148239702:0.00658583037345314946)100:0.16433401642401374021,Cyanobacteria-  
Synechococcus\_sp\_RS9916\_116074644:0.05435115900217706020)70:0.04472446468904963529,(Cyanobacteria-  
Synechococcus\_sp\_BL107\_116070730:0.03475489760881422807,Cyanobacteria-  
Synechococcus\_sp\_CC9902\_78184856:0.01198638530631938176)98:0.24855070943188112276)49:0.04440481189177405974  
)22:0.03378758002816931866)29:0.09333855000504862054)35:0.15862695047585467778,(Cyanobacteria-  
Prochlorococcus\_marinus\_subsp\_marinus\_str\_CCMP1375\_33240213:0.29136802645905340858,Cyanobacteria-  
Prochlorococcus\_marinus\_str\_MIT\_9211\_84518233:0.27144954071603794032)45:0.12491062139589716173)22:0.174868662  
35046086282,(Cyanobacteria-Prochlorococcus\_marinus\_str\_NATL1A\_124025654:0.00000121823947223981,Cyanobacteria-  
Prochlorococcus\_marinus\_str\_NATL2A\_72382118:0.02769799166177893540)100:0.48758692833921551957)38:0.150143579  
48858952918)100:0.33257247840305931286)78:0.14209265610152219117)100:0.41882730631502601559,Cyanobacteria-  
Synechococcus\_elongatus\_PCC\_7942\_81299122:0.00000121823947223981,Cyanobacteria-  
Synechococcus\_elongatus\_PCC\_6301\_56751211:0.00000121823947223981);

Plantae-Arabidopsis\_thaliana\_15223438

((Bacteria-Dinoroseobacter\_shibae\_118737397:0.45543936494912928836,(Bacteria-  
Brucella\_ovis\_148560117:0.02710065679074320777,Bacteria-  
Ochrobactrum\_anthropi\_153008316:0.03331410502493362125)93:0.08265819334262312912)38:0.03131131661748781658,((B  
acteria-Rhizobium\_leguminosarum\_116253043:0.15123432228419436685,(Bacteria-  
Agrobacterium\_tumefaciens\_15887822:0.21680463142141151445,Bacteria-  
Sinorhizobium\_medicae\_150397279:0.23962959878961717641)48:0.04443220786478007528)88:0.06678121104095559313,(((  
Bacteria-Yersinia\_enterocolitica\_123443069:0.37715164271239798310,(Bacteria-  
Enterobacter\_sakazakii\_156933054:0.19414869639000656432,Bacteria-  
Serratia\_proteamaculans\_157369252:0.09766310826658038124)82:0.05258590289716134902)28:0.05913168208968864331,(B  
acteria-Flavobacterium\_johnsoniae\_146300119:0.41905823170522610299,(Bacteria-  
Actinobacillus\_pleuropneumoniae\_126208921:0.10605829798926413865,(Bacteria-  
Acinetobacter\_baumannii\_126643256:0.20620818122237180581,Bacteria-  
Campylobacter\_conciscus\_157165442:0.18279900500118537177)33:0.03957864864904749730)40:0.04467183044024773675)1  
0:0.02512002725462915767)4:0.03127848961013436624,((((Bacteria-  
Chromobacterium\_violaceum\_34498319:0.10922270915571131999,(Bacteria-  
Aeromonas\_salmonicida\_145298297:0.10829954986346933266,(Bacteria-  
Janthinobacterium\_sp\_152980783:0.11520113233578692380,(Bacteria-  
Methylobacillus\_flagellatus\_91774535:0.16555672112043598454,(Bacteria-  
Vibrionales\_bacterium\_148977691:0.15289233219224815374,Bacteria-  
Psychromonas\_sp\_90409060:0.18382293194807095005)29:0.04176601036358439101)20:0.04084573978934322169)15:0.034  
34171972351262453)15:0.04631751851725931374)19:0.05327395639328122434,(Cyanobacteria-  
Cyanotheca\_sp\_CCY0110\_126657504:0.18144261299267511189,(Cyanobacteria-  
Synechocystis\_sp\_PCC\_6803\_16330455:0.27245073266934816125,Cyanobacteria-  
Synechococcus\_sp\_WH\_5701\_87302992:0.35402647725992852923)52:0.11308333049020991012)73:0.150026496377601653  
58)3:0.03774893264850671254,(((Bacteria-Photobacterium\_profundum\_90414810:0.14256094989067341627,Bacteria-  
Vibrio\_angustum\_90579002:0.09783954335465082364)86:0.09594611797893685956,(((Bacteria-  
Myxococcus\_xanthus\_108762920:0.15695180276306075484,Bacteria-  
Frankia\_alni\_111220867:0.58095341020746782412)99:0.37435921362201418638,((Bacteria-  
Bacteroides\_caccae\_153807854:0.57290690352105377858,(((Chromalveolata-  
Aureococcus\_anophagefferens\_29268:1.08426843276093509694,(((Plantae-  
Physcomitrella\_patens\_135286:0.00000121823947223981,Plantae-  
Physcomitrella\_patens\_83986:0.00000121823947223981)100:0.07336777467881502868,((((Plantae-  
Oryza\_sativa\_115480437:0.33050698275504525325,(Plantae-Oryza\_sativa\_115459470:0.03064481392442429050,Plantae-  
Oryza\_sativa\_115447423:0.03680295832555538493)58:0.01041247702820917963)37:0.03626660205126711750,(Plantae-  
Oryza\_sativa\_115456759:0.40445625550725472497,((Plantae-Oryza\_sativa\_115471891:0.31203332337152367426,Plantae-  
Oryza\_sativa\_115471887:0.02166597177773124314)29:0.00000121823947223981,Plantae-  
Oryza\_sativa\_115471889:0.01243191533894922110)75:0.06461456536687988639)29:0.03636325639439792062)11:0.0291232  
1649702720797,(((Plantae-Arabidopsis\_thaliana\_15233102:0.10266716642338809262,Plantae-  
Arabidopsis\_thaliana\_15224999:0.10107491910462151896)42:0.04880974396461426612,(((Plantae-  
Arabidopsis\_thaliana\_79314872:0.00000121823947223981,Plantae-  
Arabidopsis\_thaliana\_15231810:0.00000121823947223981)98:0.03531560291415470482,(Plantae-  
Arabidopsis\_thaliana\_15228095:0.00553435385150433199,Plantae-  
Arabidopsis\_thaliana\_15228096:0.04038690293803239018)65:0.00000121823947223981)56:0.04475979126215817033,Plantae  
-  
Arabidopsis\_thaliana\_15239397:0.09090818928578363323)20:0.01813891997205947793)14:0.02196133066911864357,Plantae  
-Oryza\_sativa\_115471893:0.06902549733041744850)3:0.01370382487441103130)18:0.03225818537569167394,(Plantae-  
Oryza\_sativa\_115457384:0.12131783242153405811,(Plantae-

Arabidopsis\_thaliana\_15236267:0.06738598654501574969,Plantae-  
Arabidopsis\_thaliana\_15227302:0.02438167728887671512)72:0.03966003946052355095)69:0.05676457210650422830)21:0.0  
6678646881512532996,(((Plantae-Oryza\_sativa\_115447785:0.03817040221369502606,Plantae-  
Oryza\_sativa\_115449847:0.06470806338175347228)84:0.03570466156943093161,Plantae-  
Oryza\_sativa\_115459882:0.02359091828472030875)94:0.05439784260699126461,(((Plantae-  
Arabidopsis\_thaliana\_42572785:0.05790068224402989544,Plantae-  
Arabidopsis\_thaliana\_18411332:0.00000121823947223981)86:0.01662333315778075082,((Plantae-  
Arabidopsis\_thaliana\_15233109:0.01662811186340811334,Plantae-  
Arabidopsis\_thaliana\_15225913:0.01116067450184797701)98:0.03435350399802312993,Plantae-  
Arabidopsis\_thaliana\_15223438:0.00560027477996302616)10:0.00000121823947223981)49:0.02797569840863609394,Plantae  
-  
Arabidopsis\_thaliana\_15236485:0.00625057139821447172)40:0.02130164441723034902)81:0.07263817655754324643,(Planta  
e-Physcomitrella\_patens\_171662:0.15543063456149669443,(Plantae-  
Physcomitrella\_patens\_62169:0.04778845650489971925,Plantae-  
Physcomitrella\_patens\_166091:0.04259575737165642584)96:0.07408535810350351525)53:0.02801256135750945439)98:0.17  
815610431516440415)17:0.06740141896565267354,(Plantae-  
Physcomitrella\_patens\_202226:0.04548333316600312176,(Plantae-  
Physcomitrella\_patens\_209703:0.03071800145050631800,(Plantae-  
Physcomitrella\_patens\_68172:0.51794022051932997464,Plantae-  
Physcomitrella\_patens\_196472:0.02335224880884619741)10:0.02646995199885174982)6:0.01450514808349711963)6:0.0465  
4277627742928192)27:0.04347820297918023047)100:0.65638382475751388956,(((Opisthokonta-  
Apis\_mellifera\_110758861:1.28293778200189967365,(Opisthokonta-  
Apis\_mellifera\_66514115:0.60458269256926522317,(Opisthokonta-  
Drosophila\_melanogaster\_45551084:0.00000121823947223981,Opisthokonta-  
Drosophila\_melanogaster\_24652747:0.00000121823947223981)100:0.55942820925188396775)85:0.17157170745390712407)2  
5:0.12654866020605498589,(Opisthokonta-Apis\_mellifera\_48095246:0.44381554835551162430,(Opisthokonta-  
Drosophila\_melanogaster\_24652751:0.02680390387455394707,Opisthokonta-  
Drosophila\_melanogaster\_19922038:0.01036119097302500534)100:0.70782842693162262293)90:0.28677565190039883136)3  
7:0.08448393421013519755,((Opisthokonta-Drosophila\_melanogaster\_17136672:0.46700908754697778580,Opisthokonta-  
Apis\_mellifera\_66553045:0.93977222850738617588)100:0.52003932469418723272,(((Opisthokonta-  
Danio\_erio\_46309487:0.24906041790707636463,Opisthokonta-  
Danio\_erio\_125805208:0.25915942477966619206)93:0.13058254779242839394,Opisthokonta-  
Mus\_musculus\_6680710:0.27728622642514927366)97:0.31307634548791746232,((Opisthokonta-  
Mus\_musculus\_6857757:0.32659649701191656446,Opisthokonta-  
Mus\_musculus\_28201966:0.51063748536869757455)89:0.12680695053704832409,(((Opisthokonta-  
Danio\_erio\_125851556:0.00000121823947223981,Opisthokonta-  
Danio\_erio\_66472262:0.01212337449661886335)100:0.13874726065443968026,Opisthokonta-  
Danio\_erio\_57525964:0.07099175146883501819)100:0.20538070176807038392,Opisthokonta-  
Mus\_musculus\_31543250:0.17599181515532211217)100:0.28841884591468996968)72:0.13446829410608096556)75:0.15620  
847573509244466,(Opisthokonta-Mus\_musculus\_33563244:0.17397476900870564864,Opisthokonta-  
Danio\_erio\_54261805:0.22328845866657798247)100:0.34731305609108936716)71:0.14008326351102240448)46:0.12343963  
619836123558)23:0.14094445010814232733,(Plantae-Physcomitrella\_patens\_144131:0.67580756450413570491,(Chlamydia-  
Candidatus\_Proteochlamydia\_46446430:1.03737868734064120346,(((Plantae-  
Oryza\_sativa\_115435484:0.51208455230636995559,Plantae-  
Arabidopsis\_thaliana\_15225195:0.31236544037769659043)99:0.18071589231838533496,(((Plantae-  
Oryza\_sativa\_115459542:0.44074340600210676344,Plantae-  
Oryza\_sativa\_115482680:0.23405590110231946910)92:0.13245419795701918186,(Plantae-  
Arabidopsis\_thaliana\_15219403:0.13457478153045654423,(Plantae-  
Arabidopsis\_thaliana\_30685536:0.11116270525731004881,Plantae-  
Arabidopsis\_thaliana\_15220848:0.00000121823947223981)99:0.08919961325602124291)95:0.19185806449796477535)98:0.3  
1584597377744783042,((Plantae-Arabidopsis\_thaliana\_15234189:0.18090721403202203454,Plantae-  
Oryza\_sativa\_115442565:0.19657356039598203323)79:0.11669723921453595272,(Plantae-  
Oryza\_sativa\_115450711:0.16928016900364645236,(Plantae-  
Arabidopsis\_thaliana\_15228041:0.06336061086324908109,Plantae-  
Arabidopsis\_thaliana\_15231569:0.13511645840212216374)92:0.07871329322630131464)32:0.02635785432365100531)80:0.1  
3887122961630754547)73:0.11778444628444910414,((Plantae-  
Arabidopsis\_thaliana\_15232798:0.67274903133281582779,Plantae-  
Oryza\_sativa\_115459786:0.54309388839247152436)97:0.36766541709128880422,((Plantae-  
Oryza\_sativa\_115467914:0.26823442091989574410,Plantae-  
Arabidopsis\_thaliana\_15233320:0.09746239908386673811)77:0.06649339795999324731,((Plantae-  
Arabidopsis\_thaliana\_15236043:0.02050956818651594391,Plantae-  
Arabidopsis\_thaliana\_15238100:0.08357275973502495403)100:0.15327387107737847072,(Plantae-

Oryza\_sativa\_115459788:0.19403292359752696838,Plantae-  
Oryza\_sativa\_115447705:0.0280994600628471508197:0.1536125486867395695372:0.04910229180587546982)88:0.0799526  
2554793551579)83:0.10591199732627119834)71:0.09798581089229722874)98:0.30021407460575222359,(Plantae-  
Physcomitrella\_patens\_73809:0.08190637138944972806,(Plantae-  
Physcomitrella\_patens\_219971:0.10476787653519900601,Plantae-  
Physcomitrella\_patens\_214518:0.0333336977513678273)68:0.03336645995941282111,Plantae-  
Physcomitrella\_patens\_191107:0.05833369761817410598)42:0.01371395450340228903)100:0.34969785842662071129)69:0.2  
2739695818823962847)80:0.12667093955573163755)81:0.17147615637199686844,(Amoebozoa-  
Dictyostelium\_discoideum\_1562532:0.79648422255363304778,Amoebozoa-  
Dictyostelium\_discoideum\_6012182:0.74697282948005228054)98:0.43763608421654165426,((Opisthokonta-  
Ustilago\_maydis\_71003379:0.74980962331004030741,(Opisthokonta-  
Cryptococcus\_neoformans\_58264756:0.55003806899605345304,Opisthokonta-Sporobolomyces\_roseus\_27302-  
fgenesh1\_pg.C\_scaffold\_5000191:0.47544103446142682579)73:0.17856983793837807872)40:0.05697931958968334432,Opist  
hokonta-Saccharomyces\_cerevisiae\_6325450:1.08126784378930995700)48:0.13648771011408772358,Opisthokonta-  
Magnaporthe\_grisea\_39944302:0.45539480367554824314)100:0.65377959544718711182)56:0.24868113085135834517)13:0.0  
6075983657636981061)18:0.12301883239998852304)13:0.14029316561775703742)23:0.28678201169989436803,Chromalveo  
lata-Phaeodactylum\_tricornutum\_42538:1.50175620514090990554)95:0.38366670819670917192,(Bacteria-  
Streptococcus\_pneumoniae\_111657305:0.82051428956947958238,Bacteria-  
Bacillus\_anthraxis\_47530041:0.26798585836498539647)58:0.12816639138685978483,Bacteria-  
Staphylococcus\_saprophyticus\_73663798:0.62196811460002277006)77:0.15877000717757530635)33:0.141759755449578056  
52)22:0.07948342477377141890,((Bacteria-Xanthobacter\_autotrophicus\_154246262:0.39420359522356573923,Bacteria-  
Mesorhizobium\_sp.\_110632827:0.50202400082818821048)59:0.13945823869462231626,(Bacteria-  
Hyphomonas\_neptunium\_114798833:0.36173289950253234570,(Bacteria-  
Rhodobacter\_sphaeroides\_146277087:0.51646927450071900001,Bacteria-  
Roseovarius\_sp.\_149203311:0.30550433200396698297)80:0.11604493303740882892)79:0.15961740626323361880)26:0.0892  
1817383190408512,Bacteria-  
unidentified\_eubacterium\_149372322:0.54649819913643726821)5:0.01160238588108256259)50:0.18124917293447070921)72  
:0.26629921882135820788,(Bacteria-Algoriphagus\_sp.\_126645866:0.19120509438346669495,Bacteria-  
Methylobacterium\_chloromethanicum\_156449619:0.46644363372522273936)14:0.03720939300264046457)1:0.048962068237  
63149529)8:0.03817097852702884542,(Bacteria-Geobacter\_bemidjensis\_145621257:0.13530161064812976091,(Bacteria-  
marine\_gamma\_90417017:0.19836615257702247539,(Bacteria-  
Shewanella\_woodyi\_118074177:0.17531841700521039185,Bacteria-  
Syntrophobacter\_fumaroxidans\_116749465:0.23410619218754480375)31:0.04422015561592649441)11:0.02976242475567415  
433)8:0.04642965230398230642,(Cyanobacteria-  
Gloeobacter\_violaceus\_PCC\_7421\_37519936:0.21312300507329151600,(Bacteria-  
Acidobacteria\_bacterium\_94967157:0.22913802897782453716,Cyanobacteria-  
Lyngbya\_sp.\_PCC\_8106\_119486832:0.24744128637058981912)21:0.05782331133851623117)5:0.03364561597817449651,(B  
acteria-Bradyrhizobium\_sp.\_148252484:0.32694423939575528726,Bacteria-  
Pseudomonas\_putida\_148546824:0.15480378405488165461)50:0.10226478093518462376,(Bacteria-  
Anaeromyxobacter\_dehalogenans\_86160023:0.21940655574706502406,Bacteria-  
Burkholderia\_vietnamiensis\_134294322:0.18023786896558249837)79:0.09938368097748236096)11:0.0689045418948516230  
6)6:0.05752530227984026245)4:0.01459545007050284428)0:0.03821741579220469531)0:0.06089105527525352085,(Bacteria  
-Ralstonia\_metalidurans\_94314624:0.46085822310396817869,Bacteria-  
Sphingopyxis\_alaskensis\_103485731:0.27187567497001230432)51:0.14071996614568685335)0:0.04556133855508675418,(B  
acteria-Clavibacter\_michiganensis\_148271568:0.75880800215275423515,Bacteria-  
Delftia\_acidovorans\_118730753:0.27375293265871292192)9:0.11922468432753655088,Bacteria-  
Bordetella\_bronchiseptica\_33601128:0.32405348173076531371)2:0.09150981108830939792)2:0.04180198816745388235)62:0  
.10799213929720964666)68:0.08562793606991055129,Bacteria-  
Sphingomonas\_wittichii\_148552957:0.16720048009326676786);

Plantae-Arabidopsis\_thaliana\_15225451

(Plantae-Cyanidioschyzon\_merolae\_CMR075C:0.75655030811775403343,((Plantae-  
Chlamydomonas\_reinhardtii\_151368:0.09396607105999751908,Plantae-  
Volvox\_carteri\_55127\_jgi:0.18334992994923318688)100:0.54054179698876581028,((Plantae-  
Ostreococcus\_tauri\_15605:0.07230586546879974597,Plantae-  
Ostreococcus\_lucimarinus\_14357:0.07046251382067175717)93:0.07945507966903302133,Plantae-  
Ostreococcus\_lucimarinus\_18839:0.24280882928795149978)100:0.36972839276298569144,((Plantae-  
Physcomitrella\_patens\_166362:0.05163917940654866312,(Plantae-  
Physcomitrella\_patens\_163131:0.03718570693248270803,(Plantae-  
Physcomitrella\_patens\_60904:0.11842947210322359031,Plantae-  
Physcomitrella\_patens\_165615:0.02144787825170767215)90:0.03956334909585830506)98:0.05057687066712956980)100:0.1  
0815085992940498549,(Plantae-Physcomitrella\_patens\_108048:0.05588345521738639909,Plantae-

Physcomitrella\_patens\_56808:0.02408349897329282313)100:0.05817922218227255388,(Plantae-  
Physcomitrella\_patens\_179857:0.06773380587007250819,(Plantae-  
Physcomitrella\_patens\_55001:0.03440271899973951913,Plantae-  
Physcomitrella\_patens\_55414:0.02695259123675286875)55:0.02038545844841998037)98:0.05380059283971511119)50:0.022  
32289043092217443)99:0.07007837459164120708,(Plantae-  
Arabidopsis\_thaliana\_15234745:0.08550817030797305818,(Plantae-  
Oryza\_sativa\_115449159:0.02826283304528044715,Plantae-  
Oryza\_sativa\_115466832:0.17663433507011278012)98:0.06467541975768859031)99:0.09856667712007707860)71:0.0356748  
7600321434665,(Plantae-Oryza\_sativa\_115451921:0.25448006728295996526,(Plantae-  
Arabidopsis\_thaliana\_15234486:0.15851185665657899215,(Plantae-  
Arabidopsis\_thaliana\_15225451:0.08924260207487165475,(Plantae-  
Arabidopsis\_thaliana\_15217591:0.04605704846155125182,Plantae-  
Arabidopsis\_thaliana\_15236712:0.01272330813821974903)85:0.02280977715461360647)60:0.03868746097547885038)44:0.0  
3147689684599269677)39:0.03458417639861605802,(Plantae-Oryza\_sativa\_115477399:0.08484407697455917385,Plantae-  
Oryza\_sativa\_115480003:0.06007455367795605516)100:0.26602828644093179378,Plantae-  
Arabidopsis\_thaliana\_15229524:0.13503950947701551244)82:0.10536793834986722673)73:0.03659673126754418859)99:0.2  
7809097949902567004)62:0.12060809115444494355)96:0.31477051756315060915,(Excavata-Naegleria\_gruberi\_81312-  
estExt\_fgeneshNG\_pg.C\_560068:0.92399322545860651523,(Chromalveolata-  
Aureococcus\_anophagefferens\_19538:0.89950074404000668338,(Chromalveolata-  
Aureococcus\_anophagefferens\_2757:0.50887179716609420854,Chromalveolata-  
Aureococcus\_anophagefferens\_18438:0.21718967825490151369)98:0.28311939343808478764)81:0.23023045238722697481)7  
7:0.23423510634591082624,(Cyanobacteria-  
Crocospaera\_watsonii\_WH\_8501\_67925414:0.34623528489528965224,(Bacteria-  
Clostridium\_thermocellum\_125972751:0.37042834723823664378,(Bacteria-  
Desulfotomaculum\_reducens\_134300858:0.50770747757838130543,Bacteria-  
Bacillus\_weihenstephanensis\_89206665:0.31748064351379429171)90:0.14351649032123067751)56:0.08371211883232830553  
)17:0.05731957498190562439,(Bacteria-Thiomicrospira\_crunogena\_78485850:0.39088659909542394777,(Bacteria-  
Geobacter\_uraniumreducens\_148264642:0.30038773600867585412,(Cyanobacteria-  
Gloeobacter\_violaceus\_PCC\_7421\_37520637:0.40020575187769802383,(Bacteria-  
Halorhodospira\_halophila\_121998958:0.38543830466929313028,Bacteria-  
Candidatus\_Desulfococcus\_121541242:0.30461526924944726247)28:0.08318715980229385298)6:0.03626181605773991234,(  
(Bacteria-Syntrophobacter\_fumaroxidans\_116747629:0.38238333466811996741,Bacteria-  
Coxiella\_burnetii\_154706468:0.41537821582679324006)18:0.06267470360340085533,(Bacteria-  
Bradyrhizobium\_sp\_146342016:0.19023200284793576054,Bacteria-  
Rhodopseudomonas\_palustris\_90422944:0.39104951373673008108)98:0.19395517997742756089,(Bacteria-  
Anaeromyxobacter\_dehalogenans\_86156650:0.27949726475400377135,(Cyanobacteria-  
Synechococcus\_sp\_RCC307\_148241284:0.29031142616505201115,(Cyanobacteria-  
Synechococcus\_sp\_WH\_5701\_87300564:0.21287722175071527309,(Cyanobacteria-  
Synechococcus\_sp\_WH\_7805\_88808092:0.06856919373534582640,(Cyanobacteria-  
Synechococcus\_sp\_RS9916\_116075546:0.06165972803271677766,(Cyanobacteria-  
Prochlorococcus\_marinus\_str\_NATL2A\_72383517:0.00000121823947223981,Cyanobacteria-  
Prochlorococcus\_marinus\_str\_NATL1A\_124025108:0.00683081831124306756)100:0.34933171232518783755,(Cyanobacteria  
-Prochlorococcus\_marinus\_str\_MIT\_9301\_126696737:0.39946617307379272965,(Cyanobacteria-  
Prochlorococcus\_marinus\_str\_MIT\_9312\_78779696:0.44436067567483078511,Cyanobacteria-  
Prochlorococcus\_marinus\_str\_MIT\_9515\_123966604:0.61569939591245925747)36:0.14890591795420374255,(Cyanobacteria  
-Prochlorococcus\_marinus\_str\_AS9601\_123968930:0.52322720937078825987,Cyanobacteria-  
Prochlorococcus\_marinus\_subsp\_pastoris\_str\_CCMP1986\_33861766:0.50575513694087670391)38:0.08102146382191066643  
)12:0.06222414199012062802)25:0.13021696025565229760)23:0.07988649866337932393,Cyanobacteria-  
Prochlorococcus\_marinus\_subsp\_marinus\_str\_CCMP1375\_33240764:0.29191143022675081209)20:0.0827095961981629962  
4,Cyanobacteria-  
Prochlorococcus\_marinus\_str\_MIT\_9211\_84517646:0.27744324184811963718)50:0.18120772418122357839,(Cyanobacteria-  
Prochlorococcus\_marinus\_str\_MIT\_9303\_124024227:0.01110507930273704064,Cyanobacteria-  
Prochlorococcus\_marinus\_str\_MIT\_9313\_33864169:0.01836329384330652806)100:0.09251937266615284372)15:0.09038702  
589606628646,Cyanobacteria-  
Synechococcus\_sp\_RS9917\_87123083:0.07434622387311760894)6:0.02014310090271436912,(Cyanobacteria-  
Synechococcus\_sp\_WH\_8102\_33864736:0.08079292999025577959,Cyanobacteria-  
Synechococcus\_sp\_CC9605\_78211743:0.13644422009790208028)42:0.01459000523607242687,(Cyanobacteria-  
Synechococcus\_sp\_CC9902\_78183807:0.03487761462695310871,Cyanobacteria-  
Synechococcus\_sp\_BL107\_116071583:0.02246645308239939021)100:0.05083456022607100305)75:0.0405216091843497230  
9)5:0.01898441525916991918,(Cyanobacteria-  
Synechococcus\_sp\_WH\_7803\_148238581:0.09022995675162799600,Cyanobacteria-  
Synechococcus\_sp\_CC9311\_113953729:0.09546348003772046897)20:0.01310444790887487984)13:0.0199022982835838253

8)12:0.02671392834391728838)27:0.10334405002144141095)20:0.09310466583476464941)87:0.25502815344747908899)24:0.04295397651536272260,(Bacteria-Novosphingobium\_aromaticivorans\_87201163:0.43303969870474245951,Bacteria-Parvibaculum\_lavamentivorans\_154252370:0.44344648674526321308)94:0.24418675125566785544)18:0.04064526143963442806)15:0.06653947057941171639)1:0.03253028610138862520,(((Bacteria-Pseudomonas\_fluorescens\_77460292:0.36527243135060755153,(Bacteria-Mariprofundus\_ferrooxydans\_114777522:0.22443703358939071091,(Bacteria-Chlorobium\_phaeobacteroides\_119357538:0.13194128076313393905,(Bacteria-Prosthecochloris\_vibrioformis\_145220024:0.05492459522572248898,Bacteria-Pelodictyon\_luteolum\_78187259:0.09637872529465471572)89:0.06739159372659862812)98:0.09525647222195428310)19:0.04529874542300196816)15:0.05267309574086315171,(((Bacteria-Hahella\_chejuensis\_83647583:0.15360595756063849526,Bacteria-Marinobacter\_aquaeolei\_120554607:0.11417205336003179056)81:0.06417128831105295417,(((Bacteria-Nitrosomonas\_europaea\_30250207:0.28859284227516623922,Bacteria-Magnetococcus\_sp.\_117925406:0.28190263177250474147)40:0.08635585774508006129,(Bacteria-Nitrosococcus\_oceani\_77166096:0.29915646896743763872,Bacteria-delta\_proteobacterium\_94264686:0.21963677804081790934)13:0.02121193104487383713)6:0.03065006134714570729,Bacteria-Methylococcus\_capsulatus\_53803405:0.24555088214390788370)20:0.04627764349201829441)31:0.09372707117112752395,(Cyanobacteria-Thermosynechococcus\_elongatus\_BP-1\_22298743:0.36985874578616934061,Bacteria-Alkalilimnicola\_ehrlichei\_114321825:0.42648361920100308353)5:0.04938410720533582821)18:0.02925500531928372505)8:0.07065521190530243967,(((Bacteria-Desulfotalea\_psychrophila\_51246568:0.34485753038867150710,Bacteria-Saccharophagus\_degradans\_90020265:0.32297576408859379749)20:0.05299519505004219450,(((Cyanobacteria-Nostoc\_punctiforme\_PCC\_73102\_23128940:0.22733957166637411285,Cyanobacteria-Lyngbya\_sp.\_PCC\_8106\_119493841:0.28808978614640401439)11:0.03485579786796696306,Cyanobacteria-Nodularia\_spumigena\_CCY9414\_119509616:0.17674198148205477743)34:0.06707141239036121250,(Bacteria-Lawsonia\_intracellularis\_94987022:0.37749734222345759926,Bacteria-Desulfovibrio\_desulfuricans\_78355080:0.16811232240252174663)96:0.18635975691636127993)1:0.02548705601594410813)2:0.04458349913148351717,(((Bacteria-Azoarcus\_sp.\_119897143:0.13990488258923913789,(Bacteria-Dechloromonas\_aromatica\_71909541:0.12634803462484089920,Bacteria-Rhodoferax\_ferrireducens\_89899467:0.12777966336574261841)99:0.06254873444769794288)100:0.13812259729500589445,(((Bacteria-Klebsiella\_pneumoniae\_152971031:0.15059088036894910378,(((Bacteria-Enterobacter\_sakazakii\_156933709:0.14545382047157079386,Bacteria-Serratia\_proteamaculans\_157370947:0.10772685075224540385)92:0.07447120364546354343,Bacteria-Sodalis\_glossinidius\_85059347:0.21103550503774637370)56:0.02964774132007997123)87:0.06814084738397158114,(((Bacteria-Moritella\_sp.\_149909354:0.20836821895979476538,(Bacteria-Photobacterium\_sp.\_89076363:0.01925794219895904727,Bacteria-Vibrio\_angustum\_90580916:0.00529882165787510465)100:0.06549195211969813246)100:0.08733423346522023456,(Bacteria-Aeromonas\_hydrophila\_117618758:0.25875736193677001395,Bacteria-Shewanella\_oneidensis\_24376158:0.21465314106810950978)53:0.04173920291454157050)41:0.02260254014206589807,Bacteria-Psychromonas\_sp.\_90407559:0.43873181533993310666)80:0.06598658809849219931)95:0.14804615719984981492,(Bacteria-Oceanospirillum\_sp.\_89094083:0.21797662989180116577,(Bacteria-Alteromonadales\_bacterium\_119469403:0.08224800641862654860,Bacteria-Pseudoalteromonas\_tunicata\_88860035:0.11220322225709714048)100:0.28157430234080765841)99:0.16678901841648358095)55:0.10645306114974120715)7:0.03773457029339739865,(((Bacteria-Beggiatoa\_sp.\_153868858:0.26534805141408485119,Bacteria-Pelobacter\_carbinolicus\_77919068:0.18131435884828692173)27:0.02916414108155028148,Bacteria-Syntrophus\_aciditrophicus\_85858261:0.24785265543665216392)9:0.02914400248076419453)0:0.02879261721837854393)0:0.03691161261496725410)0:0.0000121823947223981)0:0.01536155649035269785)2:0.05281258726356598959)2:0.06055363467615998418)5:0.04504214017031179379)99:0.29158315875490042890)27:0.07431156872346662834)46:0.06811087789421313432,Chlamydia-Candidatus\_Protoclamydia\_46445713:0.57115155133578043856);

Plantae-Arabidopsis\_thaliana\_15232565

(Bacteria-Moritella\_sp.\_149910598:0.28853564694837896543,(((Bacteria-Vibrionales\_bacterium\_148977769:0.14157280622193116337,Bacteria-Vibrio\_sp.\_116185625:0.09485735204610550031)100:0.18338260116715976444,Bacteria-Photobacterium\_sp.\_89075262:0.28200471588824838065)87:0.10347199247257279908,(((Bacteria-Hahella\_chejuensis\_83647978:0.30164389604154862035,(Bacteria-Marinobacter\_sp.\_126668780:0.22006037218713481174,Bacteria-marine\_gamma\_119477364:0.25295106905191683255)26:0.07769221376557759740)7:0.04083422135920387885,(((Bacteria-Chromohalobacter\_salexigens\_92114343:0.39240478382016485970,(Bacteria-Oceanospirillum\_sp.\_89093952:0.23354318536244902949,Bacteria-

Oceanobacter\_sp\_94501782:0.31866450980148453009)39:0.05858908494480694062)8:0.03524695943612595611,(Bacteria-Saccharophagus\_degradans\_90022816:0.43267130923773960971,Bacteria-Pseudomonas\_fluorescens\_70728302:0.23056169941999424267)50:0.07346145524285385697)5:0.05022900418008610646)26:0.05967389089222702170,(Bacteria-Coxiella\_burnetii\_153208981:0.34038439128454989202,Bacteria-Legionella\_pneumophila\_148360514:0.35863995513135871196)69:0.12180186770437934074)6:0.03528813700677958104,(((Bacteria-Granulibacter\_bethesdensis\_114327364:0.67006411406319488222,((Bacteria-Anaeromyxobacter\_sp\_153003237:0.79629294126242344820,(Bacteria-Halothermothrix\_orenii\_89211044:0.51902966978210596238,(Bacteria-Geobacter\_sp\_110600646:0.45986977862481226431,Bacteria-Thermosinus\_carboxydvorans\_121534986:0.22130518662279710651)36:0.07508304166807588942)56:0.07835143184958565099)10:0.05171650635010232450,(((Bacteria-Sulfurovum\_sp\_152993936:0.28493193464934185588,Bacteria-Caminibacter\_mediterraneus\_149194802:0.30206659404698499305)100:0.28753517581314474993,Bacteria-Marinomonas\_sp\_152995154:0.60595885416548878055)74:0.13189773672265919791,(((Bacteria-Prosthecochloris\_vibrioformis\_145220332:0.12654385497090139823,Bacteria-Pelodictyon\_luteolum\_78187601:0.11824005945765125869)100:0.14570135511296267161,Bacteria-Chlorobium\_chlorochromatii\_78188445:0.18723885059875497450)100:0.44226203859302287702,((Bacteria-Hydrogenobaculum\_sp\_156718597:0.50055544701623788661,Bacteria-Leptospira\_borgpetersenii\_116329828:0.68564254769657773103)50:0.23722590800924855947,(((Cyanobacteria-Synechococcus\_elongatus\_PCC\_7942\_81301100:0.00000121823947223981,Cyanobacteria-Synechococcus\_elongatus\_PCC\_6301\_56751818:0.00000121823947223981)100:0.40323605124573497216,(Cyanobacteria-Synechococcus\_sp\_RCC307\_148241383:0.27272151046453618761,(((Cyanobacteria-Synechococcus\_sp\_RS9916\_116074469:0.09499079371051809273,Cyanobacteria-Synechococcus\_sp\_RS9917\_87123156:0.02929988994670923441)38:0.01640169019825607824,(Cyanobacteria-Synechococcus\_sp\_WH\_7803\_148238574:0.06238333206185411178,Cyanobacteria-Synechococcus\_sp\_WH\_7805\_88808099:0.02953094579171497772)91:0.06216322306322596969)73:0.06464519957235609349,((Cyanobacteria-Synechococcus\_sp\_WH\_8102\_33864723:0.04748325150345399787,((Cyanobacteria-Synechococcus\_sp\_CC9902\_78183795:0.02665986687693360641,Cyanobacteria-Synechococcus\_sp\_BL107\_116071595:0.02580930928364224414)99:0.05849132943025232845,Cyanobacteria-Synechococcus\_sp\_CC9605\_78211735:0.07544847618991998295)52:0.01662432352857294571)96:0.05778725729434109476,(Cyanobacteria-Prochlorococcus\_marinus\_str\_MIT\_9313\_33864177:0.00643531627983267348,Cyanobacteria-Prochlorococcus\_marinus\_str\_MIT\_9303\_124024239:0.00310282836696896321)99:0.12424993435589475055)76:0.02684355112297439477)33:0.07391184714678515622,Cyanobacteria-Synechococcus\_sp\_WH\_5701\_87301993:0.16798880490446072011)43:0.06897628867067202851)100:0.48469408760375171097)100:0.22214162805206744133,(((Chlamydia-Chlamydomonas\_repedens\_29839986:0.06257284527090384296,Chlamydia-Chlamydomonas\_repedens\_62184858:0.06299270616582014481)64:0.02000345428018934779)100:0.17172924812152076668,(Chlamydia-Chlamydia\_muridarum\_15835294:0.06531303695538073772,(Chlamydia-Chlamydia\_trachomatis\_76789130:0.00000121823947223981,Chlamydia-Chlamydia\_trachomatis\_15605124:0.00000121823947223981)100:0.07661473825017110773)100:0.21789225062589118176)88:0.10808676432144624646,(Chlamydia-Chlamydomonas\_pneumoniae\_15836057:0.00000121823947223981,(Chlamydia-Chlamydomonas\_pneumoniae\_16752515:0.00000121823947223981,(Chlamydia-Chlamydomonas\_pneumoniae\_33241878:0.00000121823947223981,Chlamydia-Chlamydomonas\_pneumoniae\_15618437:0.00000121823947223981)26:0.00000121823947223981)19:0.00000121823947223981)100:0.30255550719396839821)100:0.68833798446102001378,(Chlamydia-Candidatus\_Proteochlamydia\_46447416:0.47181785095741257674,(Plantae-Arabidopsis\_thaliana\_15232565:0.18440154043059778233,Plantae-Oryza\_sativa\_115444351:0.29061050813060146369)100:0.18777329477161741611,(Plantae-Physcomitrella\_patens\_140682:0.26607877962051534881,Plantae-Physcomitrella\_patens\_149317:0.28533900915786880592)71:0.09314595109915216331)100:0.51876034939207782415)64:0.06009847423315149012)100:0.48486471067213282593)63:0.12776459145156571218)23:0.04688066202726002413)18:0.10660489770929783401)4:0.04098732214385593375)14:0.02904958735832310554)22:0.09008802280546428232,((Bacteria-Acinetobacter\_baumannii\_126641282:0.41310317725887502061,Bacteria-Francisella\_tularensis\_118497807:0.49144808278183471639)72:0.14817703664669346075,Bacteria-Neisseria\_meningitidis\_121635512:0.54812194541615055776)8:0.11877130910893039795)1:0.04374028240398702971,((Bacteria-Nitrosococcus\_oceani\_77166240:0.29459969871940278052,(Bacteria-Alkalilimnicola\_ehrlichei\_114321374:0.19739986401022402429,Bacteria-Halorhodospira\_halophilum\_121998900:0.17945116270718100560)81:0.05365773201532186149)65:0.07782614744630945991,(Bacteria-Xanthomonas\_campestris\_78048669:0.10731317030584686112,Bacteria-Xylella\_fastidiosa\_28198550:0.14039687391370286873)100:0.24706066935140519325,((Bacteria-Chromobacterium\_violaceum\_34498782:0.35453934977066076106,Bacteria-Delftia\_acidovorans\_118731176:0.41079297448366847156)10:0.10415616843557055915,((Bacteria-Dechloromonas\_aromatica\_71909030:0.26131421488567246891,Bacteria-



Azoarcus\_sp.\_56476147:0.26275092167903080220)27:0.05415957912891224135,((Bacteria-Klebsiella\_pneumoniae\_152971565:0.89639734755099420571,Bacteria-Limnobacter\_sp.\_149925780:0.36866349834456119128)10:0.07727059715245490623,((Bacteria-Bordetella\_bronchiseptica\_33603475:0.36241718802832390001,(Bacteria-Ralstonia\_eutropha\_113866420:0.18376790352461389033,(Bacteria-Janthinobacterium\_sp.\_152980996:0.09652131704537683654,Bacteria-Herminimonas\_arsenicoxydans\_134096259:0.05426181985011926251)100:0.17855271346553935885)84:0.07638640267527191385)39:0.07421121596193228087,(Bacteria-Polynucleobacter\_sp.\_145590086:0.40419869577074823974,Bacteria-Burkholderia\_phytofirmans\_118044264:0.22822429014604730946)70:0.04160653213671251793)29:0.05578666395744757284)2:0.02651148229745446672)9:0.08137854642099520697)5:0.11222600721317033123)3:0.06119089944118411006)1:0.08344787537782148712)9:0.06583527725134935560)83:0.13637150083598753580,(Bacteria-Alteromonadales\_bacterium\_119469170:0.17808584670714008857,Bacteria-Pseudalteromonas\_tunicata\_88861159:0.13267565438210107698)100:0.17325534877431028602)61:0.05174713888479474250)64:0.05521782630084864224,Bacteria-Shewanella\_sediminis\_157373870:0.33437382757111300258);

Plantae-Arabidopsis\_thaliana\_15235511

(Chromalveolata-Phytophthora\_sojae\_111707:0.01246258153784937303,((Plantae-Ostreococcus\_lucimarinus\_203:0.66501089057567142060,(((Cyanobacteria-Anabaena\_variabilis\_ATCC\_29413\_75907770:0.08293179511720584485,Cyanobacteria-Nostoc\_punctiforme\_PCC\_73102\_23130092:0.08748013539878335409)100:0.36549511426518793700,((Plantae-Physcomitrella\_patens\_215914:0.31930773545075225028,Plantae-Volvox\_carteri\_64450\_jgi:0.43041335985057960212)96:0.12024428047741932135,((Plantae-Ostreococcus\_tauri\_18425:0.10999490955319916885,Plantae-Ostreococcus\_lucimarinus\_611:0.05015803625092930124)100:0.53940038481901431133,(Plantae-Physcomitrella\_patens\_142921:0.29594698076783437779,(Plantae-Oryza\_sativa\_115451097:0.22522550656229547994,(Plantae-Arabidopsis\_thaliana\_79328347:0.01622880047240846113,Plantae-Arabidopsis\_thaliana\_42570031:0.00247487584770720572)100:0.18877211520183720395)99:0.14447973707578287694)100:0.17548666905379647907)97:0.13045635005323752420)100:0.23405480619709145840)100:0.27630975285531694796,(((Bacteria-Nocardioides\_sp.\_119715897:0.53525063619944635018,Bacteria-Oenococcus\_oeni\_116490441:0.70409374072883346152)100:0.30065308188737432937,(((Bacteria-Serratia\_proteamaculans\_157368458:0.32601615499970931777,Bacteria-Vibrio\_cholerae\_153824990:0.32392839774184611912)100:0.50115005214781049858,Bacteria-Chloroflexus\_aggregans\_118045776:0.54282937098427541667)67:0.09478098849850900842,(((Bacteria-Desulfotomaculum\_reducens\_134299385:0.38869857462293161410,(Cyanobacteria-Nostoc\_sp.\_PCC\_7120\_17158758:0.07635809319327882538,Cyanobacteria-Anabaena\_variabilis\_ATCC\_29413\_75907348:0.13992794047212525621)100:0.56861376750127612389)41:0.08053149149117512506,((Bacteria-Geobacillus\_thermodenitrificans\_138894309:0.27900242915383333120,((Bacteria-Staphylococcus\_aureus\_49482927:0.21712288564999540630,Bacteria-Lactococcus\_lactis\_146322228:0.29448068053190262772)100:0.11186444232909042995,(Bacteria-Bacillus\_coagulans\_124519839:0.09359099418284345939,Bacteria-Streptococcus\_agalactiae\_22537407:0.11069626203553814547)100:0.10829180080052880353)100:0.11625826290158078336)100:0.21426267682299407480,(Bacteria-Francisella\_tularensis\_118497001:0.67768491416153264773,Chlamydia-Candidatus\_Proteochlamydia\_46445921:0.86730352020779155620)48:0.11976013667268184393)28:0.04560058721148928240)44:0.10441741329319596809,(Bacteria-Ralstonia\_solanacearum\_17548540:0.52512376425299145399,(Bacteria-Methylobacillus\_flagellatus\_91776900:0.36425888835202163696,(Cyanobacteria-Synechococcus\_sp.\_WH\_5701\_87302472:0.32587412148101224663,(Bacteria-Polaromonas\_naphthalenivorans\_121606885:0.18053833255604298524,Bacteria-Comamonas\_testosteroni\_118053356:0.48309743024168816383)86:0.09395749958872084973)100:0.20503908992316313697)44:0.07943611482220570841)100:0.31987708180722990159)47:0.06628772714372969943,((Chromalveolata-Phaeodactylum\_tricornutum\_52367:0.40994071491743766522,Chromalveolata-Thalassiosira\_pseudonana\_261657:0.39015174918169043261)100:0.66162223123486707532,(Bacteria-Desulfotomaculum\_hafniense\_89897147:0.42488788173308844609,((Cyanobacteria-Synechocystis\_sp.\_PCC\_6803\_16331908:0.19372149201259544760,(Cyanobacteria-Lyngbya\_sp.\_PCC\_8106\_119486614:0.17914553799363841513,Cyanobacteria-Nostoc\_punctiforme\_PCC\_73102\_23126943:0.22427220494381835958)78:0.05497321958793216501)100:0.19543335055762095509,(Bacteria-Treponema\_denticola\_42526892:0.82764264838565038129,((Bacteria-Petrogona\_mobilis\_145622585:0.01037869665110825387,Bacteria-Caldicellulosiruptor\_saccharolyticus\_146295535:0.00758375433760161057)100:0.23229187730570011183,(((Bacteria-Ruminococcus\_obeum\_153809757:0.19833087971182533638,Bacteria-Dorea\_longicatena\_153855119:0.11455296129776280922)100:0.25565815038445915963,Bacteria-Bacteroides\_capillosus\_154500246:0.24525056386213930915)92:0.09235197551925514170,Bacteria-

Clostridium\_cellulolyticum\_118726401:0.26188165338689151085)99:0.14954241012359045793)98:0.09350993789515349430  
)27:0.06299613466729794831)20:0.09221563711270996944)100:0.54816265294657828822)28:0.09828108444118859033)12:  
0.02294942915166439668)59:0.07561065957926250969,((Bacteria-  
Hyphomonas\_neptunium\_114799122:0.29028401484908145092,((Bacteria-  
Mycobacterium\_sp.\_119855063:0.35498514693541399767,Bacteria-  
Caulobacter\_sp.\_113933097:0.24307899947494299164)36:0.05543955924722877154,((Bacteria-  
Corynebacterium\_glutamicum\_145294191:0.57032518091400230542,(Bacteria-  
Gramella\_forsetii\_120434636:0.39262649013736833359,Bacteria-  
Pedobacter\_sp.\_149280156:0.20990716432487191434)100:0.16515248378063998591)18:0.08047786450512176004,((Bacteria-  
Pseudomonas\_putida\_119857683:0.26140995443999970327,Bacteria-  
Delftia\_acidovorans\_118730278:0.15608337467044886004)93:0.06557730751262784430,((Bacteria-  
Novosphingobium\_aromaticivorans\_87200161:0.16305101157096313358,Bacteria-  
Erythrobacter\_litoralis\_85373712:0.22003787758324713786)59:0.03471502624126940328,((Bacteria-  
Mesorhizobium\_sp.\_110347229:0.09451718724845560582,(Bacteria-  
Parvibaculum\_lavamentivorans\_154253804:0.15474775582533398244,(Bacteria-  
Bradyrhizobium\_sp.\_148258486:0.06751194983223771096,Bacteria-  
Rhodopseudomonas\_palustris\_91976614:0.15410510429237850305)84:0.05030664081166413837)39:0.0269117303554666648  
1)45:0.03207856824497930248,Bacteria-  
Sphingomonas\_sp.\_113473737:0.10550825283991674408)38:0.03054287101079858693)35:0.03477705504345687121)96:0.10  
594688871681474940)12:0.03214759595144974641)47:0.09882332295708988468)100:0.40480593083953614331,(((Chlamy-  
dia-Chlamydia abortus\_62185469:0.04923317839359828141,(Chlamydia-  
Chlamydia caviae\_29840655:0.03314692739108971581,Chlamydia-  
Chlamydia felis\_89897922:0.04911246425659005627)59:0.01394579932500311301)100:0.09740272949467655705,(((Chl  
amydia-Chlamydia pneumoniae\_15836401:0.00000121823947223981,Chlamydia-  
Chlamydia pneumoniae\_33242228:0.00000121823947223981)32:0.00000121823947223981,Chlamydia-  
Chlamydia pneumoniae\_15618777:0.00000121823947223981)16:0.00000121823947223981,Chlamydia-  
Chlamydia pneumoniae\_16752171:0.00000121823947223981)100:0.14738561660424576161)92:0.0715969804065454268  
3,((Chlamydia-Chlamydia trachomatis\_15605460:0.00000121823947223981,Chlamydia-  
Chlamydia trachomatis\_76789467:0.00000121823947223981)100:0.03012149980741188338,Chlamydia-  
Chlamydia muridarum\_15834725:0.02633972736155441516)100:0.12489316995375472630)100:0.66947066790861031738,((  
Plantae-Cyanophora paradoxa\_Contig1441\_4:0.62019717512083694100,Plantae-  
Cyanidioschyzon merolae\_CMS330C:0.78140729351441540196)73:0.16014032840189340590,(((Plantae-  
Ostreococcus lucimarinus\_27426:0.02337545583303713911,Plantae-  
Ostreococcus lucimarinus\_43082:0.00000121823947223981)100:0.69993518298547974243,Plantae-  
Volvox carteri\_117840\_jgi:1.08177568527647838259)81:0.14345585482897768581,((Plantae-  
Physcomitrella patens\_148958:0.19573447183146625017,Plantae-  
Physcomitrella patens\_125638:0.16267238491670027445)100:0.15205510620856721449,(Plantae-  
Arabidopsis thaliana\_15235511:0.20515762921862265578,Plantae-  
Oryza sativa\_115469636:0.17574077517038499963)100:0.16741634328693208444)100:0.46166282184857404536)41:0.09297  
295116822909544)62:0.15466938401472829501)100:0.49423193023439032645,(((Bacteria-  
Listeria welshimeri\_116872028:0.44831884264930615958,Bacteria-  
Lactobacillus casei\_116493695:0.78913803206120758382)99:0.36739722463002721931,((Cyanobacteria-  
Nodularia spumigena\_CCY9414\_119509788:0.11065606698903063254,((Cyanobacteria-  
Anabaena variabilis\_ATCC\_29413\_75910063:0.02922165058579600377,Cyanobacteria-  
Nostoc\_sp.\_PCC\_7120\_17230653:0.04151439933207710237)100:0.06879080034519730047,Cyanobacteria-  
Nostoc punctiforme\_PCC\_73102\_23130381:0.11804540122786683076)75:0.03563856187349884186)100:0.145091108152126  
11367,(Cyanobacteria-Synechocystis\_sp.\_PCC\_6803\_16331905:0.22245545757562260047,Cyanobacteria-  
Lyngbya\_sp.\_PCC\_8106\_119483255:0.24148373678436380052)40:0.05077929644076890903)100:0.32717343842459362113)  
76:0.09233021247834950762,Bacteria-  
Streptomyces coelicolor\_21224766:0.82766147557579528016)80:0.09935826858064079892,Bacteria-  
Roseiflexus\_sp.\_148654633:0.55798606820816665230)58:0.07554207171844172508)29:0.04909502398626779812)62:0.10425  
489423165400227)65:0.11879850020740474748)99:0.32425931084394932213,((Bacteria-  
Psychrobacter\_sp.\_148653417:1.35069724749648889528,Bacteria-  
delta\_proteobacterium\_94266488:0.58628036367585656397)94:0.25987224796241764624,(Bacteria-  
Burkholderia xenovorans\_91777199:0.30886385997356158306,Bacteria-  
Acidovorax\_sp.\_121592455:0.32667570984467125816)100:0.26095071685004583850)56:0.06459931450600697733)98:0.1291  
6310619589083108,((Bacteria-Desulfovibrio vulgaris\_120601982:0.53499883255929481241,Bacteria-  
Deinococcus radiodurans\_15807440:0.50222953273843584654)45:0.06976672359061084072,Bacteria-  
Shewanella\_sp.\_114048146:0.68172474047566722355)82:0.07445746064327415925)62:0.06794119405324357264)93:0.16724  
637940860884178,((Opisthokonta-Saccharomyces cerevisiae\_6320475:0.66850272919853415132,Excavata-  
Trypanosoma brucei\_71754605:0.91764695820109176694)43:0.15094222497109069381,(Excavata-Naegleria gruberi\_275-  
gw1.12.7.1:0.74744372974597783621,Opisthokonta-

Schizosaccharomyces\_pombe\_19112621:0.65467661904730900524)68:0.16631269708413648489)9:0.04084353419705822469  
)10:0.04987687384396571888)16:0.05468905333253711032,((Plantae-  
Physcomitrella\_patens\_192723:0.24998836665623833109,((Plantae-  
Oryza\_sativa\_115444507:0.05566886776681691240,Plantae-  
Oryza\_sativa\_115469412:0.25922744566240457642)100:0.11171845568368790613,Plantae-  
Arabidopsis\_thaliana\_15241582:0.13096655623867828333)100:0.14481103574773854237)100:0.14654997497869401424,Plan  
tae-  
Chlamydomonas\_reinhardtii\_121438:0.47321035450766196773)52:0.08335866302685793205)51:0.12240051390082427873,C  
hromalveolata-Thalassiosira\_pseudonana\_263051:0.66505817017396973156)100:0.56613230958531446380,Chromalveolata-  
Phytophthora\_sojae\_129168:0.00000121823947223981);

Plantae-Arabidopsis\_thaliana\_15236554

(Plantae-Oryza\_sativa\_115462913:0.02030347321143023340,((Plantae-  
Physcomitrella\_patens\_47148:0.31643458539383906292,((Plantae-  
Arabidopsis\_thaliana\_15240108:0.24283398515828519271,Plantae-  
Oryza\_sativa\_115454113:0.53528741062950124796)100:0.41333705658279273898,(((Bacteria-  
Plesiocystis\_pacifica\_149921897:0.89151996604516758893,(Chlamydia-  
Chlamydia\_trachomatis\_15605533:0.00548635165049896935,Chlamydia-  
Chlamydia\_trachomatis\_76789542:0.00000121823947223981)100:1.11657393865327403404)61:0.28409389617738584066,(((  
Bacteria-Magnetococcus\_sp.\_117924129:0.50437548799578935110,Bacteria-  
Mariprofundus\_ferrooxydans\_114777713:0.72652188193795996796)63:0.10790141837985921247,(((Bacteria-  
Dechloromonas\_aromatica\_71909343:0.33017164425633505065,Bacteria-  
Ralstonia\_solanacearum\_17545113:0.32490180642662108701)90:0.13348951733994937618,((Bacteria-  
Nitrosococcus\_oceani\_77164043:0.38601896329189394619,(Bacteria-  
Legionella\_pneumophila\_148358613:0.46745554950142437223,(Bacteria-  
Methylococcus\_capsulatus\_53804648:0.32739779670854657345,Bacteria-  
Pseudomonas\_stutzeri\_146283515:0.39847425740875352940)35:0.07262680012072669777)29:0.08787207389886600439)31:0  
.07902181959038533099,Bacteria-  
Psychrobacter\_sp.\_148653903:0.62681729713547629235)43:0.08135854808294887275)84:0.24535316757355993267,((Bacteri  
a-Anaplasma\_marginale\_56417306:0.43262696925039212381,Bacteria-  
Ehrlichia\_ruminantium\_58578753:0.30854628112121179617)100:0.40740158005619153680,Bacteria-  
Thermosiphon\_melanesiensis\_150020070:0.82366068666404890219)44:0.12359477121302955838)26:0.1028606953103368276  
7)26:0.13904187939224035842,(Chromalveolata-Phytophthora\_sojae\_143144:1.20546248405775369150,(((Bacteria-  
alpha\_proteobacterium\_114769270:0.24099230980948904701,(Bacteria-  
Rhodobacter\_sphaeroides\_126463245:0.18454260956924653514,(Bacteria-  
Jannaschia\_sp.\_89056087:0.10897825726449936190,Bacteria-  
Roseobacter\_denitrificans\_110681037:0.17002086282042569443)99:0.11124643812722785630)86:0.10052311820580354940)  
100:0.38294675769488389916,(Bacteria-Maricaulis\_maris\_114569308:0.31352712693028861324,(Bacteria-  
Caulobacter\_crescentus\_16124740:0.50708828632009128601,Bacteria-  
Hyphomonas\_neptunium\_114797515:0.36053691932724074576)60:0.11722184839324169270)82:0.19690903870617157412)1  
7:0.06482553168617710693,(((Bacteria-Methylobacterium\_sp.\_149118651:0.50345567101070165528,(Bacteria-  
Xanthobacter\_autotrophicus\_154246548:0.20106784312005243631,(Bacteria-  
Bradyrhizobium\_japonicum\_27382552:0.06762513788533354442,(Bacteria-  
Rhodopseudomonas\_palustris\_90422926:0.16134094840032825457,Bacteria-  
Nitrobacter\_winogradskyi\_75676696:0.11662255074838004387)69:0.04665713559597396004)100:0.33049270346707199097)  
89:0.11047100814703320060)90:0.16328052412413507355,(Bacteria-  
Parvibaculum\_lavamentivorans\_154252704:0.37775685485075277681,(((Bacteria-  
Mesorhizobium\_sp.\_110634506:0.14323481319810205115,(Bacteria-  
Brucella\_ovis\_148559338:0.02714547359939447138,Bacteria-  
Ochrobactrum\_anthropi\_153008961:0.03236507816444732927)100:0.09784336444112283482,Bacteria-  
Bartonella\_bacilliformis\_121602891:0.18532837120811332388)94:0.09194690599916616192)61:0.03181530815893735681,((  
Bacteria-Sinorhizobium\_medicae\_150397463:0.17418959848343962271,(Bacteria-  
Rhizobium\_etli\_86358627:0.11477518536983427611,Bacteria-  
Agrobacterium\_tumefaciens\_15889503:0.09523598177110072227)97:0.08425412195927718673)92:0.08484781849695501033,  
(Bacteria-Fulvmarina\_pelagi\_114707023:0.19189493878110785996,Bacteria-  
Aurantimonas\_sp.\_90418284:0.09411584253342919482)100:0.15522018608414364649)22:0.04037672078959722577)58:0.054  
93115833817326793,Bacteria-  
Stappia\_aggregata\_118591923:0.34868355849992077600)56:0.07578769552084557715)36:0.07997935619138767105)21:0.093  
26750259848737290,((Bacteria-Magnetospirillum\_magneticum\_83313447:0.59385238767351111733,(Bacteria-  
Rhodospirillum\_rubrum\_83595075:0.29201399968047303535,(Bacteria-  
Acidiphilium\_cryptum\_148260671:0.17851001099098887104,Bacteria-  
Granulibacter\_bethesdensis\_114328980:0.11412530799891416888)100:0.40671354969348899600)69:0.0771122292570670525

6)53:0.10777307629765871255,(((Bacteria-Novosphingobium\_aromaticivorans\_87200131:0.14822597319445338093,Bacteria-Sphingomonas\_sp.\_94498282:0.16181142548250529445)41:0.06422133361750662073,Bacteria-Sphingopyxis\_alaskensis\_103487102:0.11409128387424297135)56:0.06807858546606825045,Bacteria-Erythrobacter\_sp.\_149184486:0.19890600853814704996)99:0.33215637282669818742)4:0.00059432893944164479)12:0.06716784114760591951)11:0.03724620218499700985,(Bacteria-Candidatus\_Pelagibacter\_71082803:0.17241924269285829885,Bacteria-Psychroflexus\_torquus\_91220193:0.06846452475374879831)100:0.57798430051168936394)25:0.03066046051904691705)36:0.09381892465479378662)13:0.07506565620308067177,(Bacteria-Orientia\_tsutsugamushi\_148284981:0.44168564756816086625,Bacteria-Rickettsia\_akari\_157825998:0.37534423153895335457)100:0.3930550437124520237)53:0.11451212994578217896)74:0.17325714016139731610,(Plantae-Ostreococcus\_tauri\_35604:0.13399787630270701411,Plantae-Ostreococcus\_lucimarinus\_93468:0.29299357109952528511)100:0.65710185542009436066)66:0.07424208539954089969,(Plantae-Volvox\_carteri\_106036\_jgi:0.51243152783657486271,Plantae-Chlamydomonas\_reinhardtii\_186521:0.16136294966814318519)100:0.99652644508374099708)99:0.31473374054248570708)52:0.19045772206257932657)96:0.21689471326087089720,Plantae-Arabidopsis\_thaliana\_15236554:0.20671045593178166699)98:0.17804360593053802919,Plantae-Oryza\_sativa\_115438116:0.00467149677673165190);

Plantae-Arabidopsis\_thaliana\_15237422

(Bacteria-Bdellovibrio\_bacteriovorus\_42523485:0.59109141181568625178,((((Bacteria-Algoriphagus\_sp.\_126648065:0.17699381976750577783,(Bacteria-Psychroflexus\_torquus\_91215537:0.13446376260290116011,Bacteria-Flavobacteria\_bacterium\_89889944:0.17591790823729919202)100:0.16908224870468399614)100:0.41997851991768875290,((Bacteria-Pelotomaculum\_thermopropionicum\_147678074:0.25581172023880160982,Bacteria-Desulfotomaculum\_reducens\_134299916:0.23313974950021079668)78:0.09261064613230178544,(Bacteria-Thermosinus\_carboxydivorans\_121533803:0.21451695523079827854,Bacteria-Moorella\_thermoacetica\_83589800:0.31206985230630818196)51:0.06217144767778709502,(Bacteria-Alkaliphilus\_metaliredigens\_150390514:0.21401370413860829056,Bacteria-Clostridium\_sp.\_106895571:0.22692719214695736274)100:0.15861213179784702798)16:0.03017199498879639258)62:0.05144678942863968596,(Cyanobacteria-Synechococcus\_sp.\_JA-2-3Ba2-13\_86609126:0.23422863709171798385,((Cyanobacteria-Nostoc\_punctiforme\_PCC\_73102\_23124097:0.10127778963451937455,(Cyanobacteria-Nostoc\_sp.\_PCC\_7120\_17230835:0.00246891652589342021,Cyanobacteria-Anabaena\_variabilis\_ATCC\_29413\_75909851:0.0097721612785045470)100:0.07151685837906902876)63:0.03850422548582720095,(Cyanobacteria-Thermosynechococcus\_elongatus\_BP-1\_22299414:0.17084931462344193909,(Cyanobacteria-Synechocystis\_sp.\_PCC\_6803\_16329903:0.19010116372830432319,(Cyanobacteria-Crocospaera\_watsonii\_WH\_8501\_67920030:0.05564772609339342646,Cyanobacteria-Cyanothece\_sp.\_CCY0110\_126657283:0.02825438719494655082)98:0.06739390793692535964)72:0.05937641241940428555,Cyanobacteria-Trichodesmium\_erythraeum\_IMS101\_113474322:0.16969948200421536288)53:0.05222613238384239687)52:0.03084415730434945241)54:0.06659882414044782095,((Cyanobacteria-Synechococcus\_sp.\_WH\_5701\_87301978:0.10856347284747867865,(Cyanobacteria-Synechococcus\_sp.\_RCC307\_148241230:0.09947788166153237466,((Cyanobacteria-Prochlorococcus\_marinus\_str.\_MIT\_9515\_123967030:0.06917626934793023874,((Cyanobacteria-Prochlorococcus\_marinus\_str.\_MIT\_9301\_126697140:0.02252210345545444317,Cyanobacteria-Prochlorococcus\_marinus\_str.\_AS9601\_123969351:0.02285369644540620818)61:0.01923495109414415788,Cyanobacteria-Prochlorococcus\_marinus\_str.\_MIT\_9312\_78780087:0.02849252420286479612)78:0.01716730342914042640)100:0.29796133519817746826,(Cyanobacteria-Synechococcus\_sp.\_RS9917\_87123205:0.10801502774232671356,Cyanobacteria-Synechococcus\_sp.\_RS9916\_116074418:0.04941720968996076574)68:0.02605552831096730887)33:0.02186356442138296177,((Cyanobacteria-Synechococcus\_sp.\_CC9605\_78211677:0.03325272343344303633,Cyanobacteria-Synechococcus\_sp.\_WH\_8102\_33864678:0.02100948613982499616)86:0.03408496279713991994,Cyanobacteria-Synechococcus\_sp.\_BL107\_116071647:0.05303187045558688945)84:0.03236203851070561244)59:0.06287256366040272493)76:0.09226219394987131284)100:0.31130282691396066186,(Cyanobacteria-Synechococcus\_elongatus\_PCC\_6301\_56750993:0.00000121823947223981,Cyanobacteria-Synechococcus\_elongatus\_PCC\_7942\_81299348:0.00000121823947223981)100:0.13826643658074969090)52:0.06004060551460830425)80:0.13690123247518190541)100:0.22258239674241039885)66:0.03712312100525237690)20:0.04338210793414492422,Bacteria-Thermus\_thermophilus\_46198353:0.39615654105288117259)12:0.04904203431843665723,(Bacteria-Hydrogenobaculum\_sp.\_156719562:0.35677659015873286474,(((Chlamydia-Chlamydophila\_pneumoniae\_33242279:0.00000121823947223981,Chlamydia-Chlamydophila\_pneumoniae\_16752120:0.00000121823947223981)30:0.00000121823947223981,(Chlamydia-Chlamydophila\_pneumoniae\_15618825:0.00000121823947223981,Chlamydia-Chlamydophila\_pneumoniae\_15836449:0.00000121823947223981)19:0.00000121823947223981)100:0.0694493819038805998

4,((Chlamydia-Chlamydia\_muridarum\_15834771:0.01497923221892518211,(Chlamydia-Chlamydia\_trachomatis\_15605503:0.00000121823947223981,Chlamydia-Chlamydia\_trachomatis\_76789512:0.00535988011951316155)99:0.00659724575588102862)98:0.08097006746813352474,(Chlamydia-Chlamydoghila\_caviae\_29840610:0.00294905004184562022,Chlamydia-Chlamydoghila\_felis\_89897970:0.01053216784025934327)77:0.00992312523186015746,Chlamydia-Chlamydoghila\_abortus\_62185423:0.02057552725566133556)69:0.03495550836254809196)32:0.02480206048691861037)100:0.40327747714622996789,(Chlamydia-Candidatus\_Protoclamydia\_46446872:0.30898877365627397396,(((Plantae-Ostreococcus\_tauri\_25038:0.03572266067851826571,Plantae-Ostreococcus\_lucimarinus\_35878:0.02667091853697208664)100:0.16028906902165948600,(Plantae-Volvox\_carteri\_83790\_jgi:0.02096629596403008083,Plantae-Chlamydomonas\_reinhardtii\_132552:0.16345753229337933732)100:0.17901407118476722613)99:0.10054112532674817915,(Plantae-Physcomitrella\_patens\_124905:0.00000121823947223981,(Plantae-Physcomitrella\_patens\_220915:0.01236309991886881329,Plantae-Physcomitrella\_patens\_125854:0.05841031767098340405)93:0.01560276167721863678)100:0.08759217357558299333,(Plantae-Arabidopsis\_thaliana\_79329956:0.00302493794685996208,Plantae-Arabidopsis\_thaliana\_15237422:0.00000121823947223981)100:0.09096430088181695073,(Plantae-Oryza\_sativa\_115458608:0.08054300905647809872,Plantae-Oryza\_sativa\_115466908:0.04547314274631285985)85:0.04235098358980774608)73:0.04619186163731715811)87:0.05143761199960728697)100:0.19883723028275993028,(((Plantae-Ostreococcus\_tauri\_13792:0.02885093166410104479,(Plantae-Ostreococcus\_lucimarinus\_13257:0.00000121823947223981,Plantae-Ostreococcus\_lucimarinus\_18112:0.00271230703215534236)100:0.05223670628900257268)100:0.44910751427212430853,(Plantae-Volvox\_carteri\_104947\_jgi:0.06402861272786040947,Plantae-Chlamydomonas\_reinhardtii\_139619:0.0842817251888836506)100:0.22983023051339063203,(Plantae-Physcomitrella\_patens\_230580:0.12858815985017935102,(Plantae-Physcomitrella\_patens\_214865:0.03649558449494917645,(Plantae-Physcomitrella\_patens\_87584:0.02923318402681461536,Plantae-Physcomitrella\_patens\_182892:0.03736939480573478467)93:0.02009316943280988615)92:0.03556035569665448592)85:0.05041976931157626796,(Plantae-Oryza\_sativa\_115473351:0.15960284740479258048,(Plantae-Arabidopsis\_thaliana\_18410739:0.00000121823947223981,Plantae-Arabidopsis\_thaliana\_30699063:0.00000121823947223981)100:0.11929444255956504761)93:0.06581547470711283931)100:0.18339487889101213636)77:0.07439757046119628570)99:0.14025205603915402719,Plantae-Cyanidioschyzon\_merolae\_CMM286C:0.52030210015948519242)30:0.04876289671149334343)34:0.05082998917025143698)45:0.12097289711314070104)100:0.37023355667998114615)23:0.09995697546422332991)85:0.07458138103382901118,(Bacteria-Pelobacter\_carbinolicus\_77919041:0.30225070498889272663,(Bacteria-Stigmatella\_aurantiaca\_115377154:0.11566033584747172080,Bacteria-Myxococcus\_xanthus\_108761812:0.11386454427648762255)100:0.25446779969462329785)94:0.08257640310389161020,Bacteria-Anaeromyxobacter\_dehalogenans\_86159168:0.30460514484269263225)88:0.06920183202798595168)68:0.04520282701006299308,(Bacteria-Xylella\_fastidiosa\_28199381:0.39397769045742642158,((Bacteria-Coxiella\_burnetii\_153207958:0.39340258063800936927,(((Bacteria-Psychromonas\_sp.\_90406891:0.28829848095110122141,(((Bacteria-Vibrionales\_bacterium\_148980542:0.04404288088540373597,Bacteria-Vibrio\_cholerae\_116215506:0.06588650865656331401)100:0.06951022085979519094,Bacteria-Photobacterium\_profundum\_54308390:0.11606316121526305540)100:0.10716995806351682641,(Bacteria-Sodalis\_glossinidius\_85059040:0.11959505997739483529,(Bacteria-Serratia\_proteamaculans\_157370150:0.06564300444227705311,Bacteria-Yersinia\_enterocolitica\_123441943:0.03201861507605703594)41:0.02393940972795189151,(Bacteria-Salmonella\_enterica\_62179715:0.02878193466925983712,(Bacteria-Shigella\_flexneri\_24112501:0.00000121823947223981,Bacteria-Escherichia\_coli\_110641271:0.00000121823947223981)100:0.02911659038215566597,(Bacteria-Enterobacter\_sp.\_146311266:0.02174832170549267918,Bacteria-Klebsiella\_pneumoniae\_152969647:0.01566691638933593103)69:0.01671673407343208378)48:0.00805204062461705242)91:0.04326780368203570620)58:0.02459386896225898914)100:0.09632107379747717468)37:0.03009856132523057795,(Bacteria-Shewanella\_amazonensis\_119775113:0.23132232071236885629,Bacteria-Pseudoalteromonas\_atlantica\_109898437:0.28499663299140387540)29:0.03277673167865877840)29:0.03036286817284339357,Bacteria-Aeromonas\_salmonicida\_145299026:0.18686918951599346128)56:0.04097073855529153458)73:0.06181837882638313575,(Bacteria-marine\_gamma\_119478167:0.26505922263298464792,Bacteria-Chromohalobacter\_salexigens\_92113727:0.21752250106366258220)55:0.06817264220956278931)42:0.06554405884174543950,(Bacteria-Marinobacter\_aquaeolei\_120554783:0.35512060602228284756,Bacteria-Pseudomonas\_putida\_148549004:0.21955538548850664360)65:0.07323313678813681005,(Bacteria-Nitrosococcus\_oceani\_77165140:0.26368946219886579829,Bacteria-

Methylococcus\_capsulatus\_53803736:0.20536110925567907515)96:0.12052186395721306567)13:0.01754952088693003537)2  
3:0.04117015031192367003,Bacteria-  
Marinomonas\_sp.\_152996156:0.31343679665369361675)44:0.02625527367234199369)64:0.06228995781736944987,((Bacteri  
a-Limnobacter\_sp.\_149926453:0.18622612908305094526,(((Bacteria-  
Nitrosospira\_multiformis\_82702205:0.09625242615357675058,Bacteria-  
Nitrosomonas\_europaea\_30249614:0.17549100526638761188)100:0.11238500832488668157,Bacteria-  
Azoarcus\_sp.\_56478544:0.17361424245228790353)95:0.10460506471701047637,((Bacteria-  
Dechloromonas\_aromatica\_71907647:0.21114268506066957709,(Bacteria-  
Methylibium\_petroleiphilum\_124265833:0.18911439032444854469,Bacteria-  
Ralstonia\_solanacearum\_17545773:0.09220337717943938305)81:0.04124914063566992306)66:0.05656846100408211703,Bac  
teria-  
Burkholderia\_phymatum\_118029130:0.12238080199463442777)91:0.07994150789179854666)21:0.02786289895281223589)6  
0:0.07493029168115840355,Bacteria-  
Neisseria\_meningitidis\_121634093:0.31784051436327770412)94:0.10771385951593166752)64:0.05968528986685280729)84:  
0.10459950852686974998)41:0.08449302141840261959,Bacteria-Magnetococcus\_sp.\_117925169:0.35045258190447375890);

Plantae-Arabidopsis\_thaliana\_15237589

(((Plantae-Ostreococcus\_lucimarinus\_26206:1.45340104090238275703,(Plantae-  
Physcomitrella\_patens\_15369:0.76521208984685984422,(Plantae-  
Arabidopsis\_thaliana\_15234590:0.30582997721446447681,(Plantae-  
Oryza\_sativa\_115472751:0.16395644466137396233,Plantae-  
Oryza\_sativa\_115472749:0.10577676427759462319)100:0.21500437824725379676)100:0.37513445926673594233)79:0.23825  
759054980605312)99:0.44032834968399353626,(((Cyanobacteria-  
Lyngbya\_sp.\_PCC\_8106\_119492930:0.12117278853895861734,Cyanobacteria-  
Trichodesmium\_erythraeum\_IMS101\_113475463:0.15384003344840868621)99:0.21086223444315618791,((Cyanobacteria-  
Synechococcus\_elongatus\_PCC\_7942\_81299774:0.00000121823947223981,Cyanobacteria-  
Synechococcus\_elongatus\_PCC\_6301\_56750586:0.00000121823947223981)100:0.66486642268720208548,(Cyanobacteria-  
Cyanosphaera\_sp.\_CCY0110\_126656987:0.05105363410518552747,Cyanobacteria-  
Crocosphaera\_watsonii\_WH\_8501\_67922379:0.12898398888453196931)100:0.43300189264037547421)41:0.07448874964048  
075864)94:0.18738608336244746977,Bacteria-  
Salinibacter\_ruber\_83815205:0.48197043413409046408)85:0.20277501349990165180,((Amoebozoa-  
Entamoeba\_histolytica\_67472180:0.70921755409116704616,Opisthokonta-  
Saccharomyces\_cerevisiae\_6324508:0.68079627999792557969)39:0.08495507530093419912,(((Chromalveolata-  
Alexandrium\_tamarense\_UI-D-GC1-aac-d-12-0-UI.s1\_6:0.33501945767299534662,Excavata-  
Euglena\_gracilis\_109783578\_1:0.14255494598134607620)100:0.54469935396658064608,Opisthokonta-  
Sporobolomyces\_roseus\_31017-  
estExt\_fgenes1\_kg.C\_90003:0.21606189448957777155)16:0.08068493967050860416,(Opisthokonta-  
Ustilago\_maydis\_71006290:0.22825689954676067761,Opisthokonta-  
Cryptococcus\_neoformans\_58259485:0.59450493842994522886)63:0.09578183643253679325)24:0.12298452262745934727,(  
Opisthokonta-Schizosaccharomyces\_pombe\_19075730:0.48533565984431653595,Opisthokonta-  
Magnaporthe\_grisea\_39944600:0.38891348030064742947)27:0.05726148421261940957)34:0.12278893951614444635)50:0.12  
331966427751238358)52:0.08237411987454289208,(((Plantae-  
Ostreococcus\_lucimarinus\_4650:0.06765298642932611461,Plantae-  
Ostreococcus\_tauri\_27888:0.04408407395257035039)100:0.39522932769149843324,((Plantae-  
Arabidopsis\_thaliana\_15239631:0.24119764023298959077,Plantae-  
Oryza\_sativa\_115449335:0.16209877289360771768)96:0.14817712389044468413,(Plantae-  
Physcomitrella\_patens\_191256:0.02440239519247265967,Plantae-  
Physcomitrella\_patens\_162819:0.03949578908804328436)99:0.12831557973980445286)99:0.25277895668261368689)86:0.21  
022128278385646127,((Plantae-Physcomitrella\_patens\_130451:0.20413633254813734474,((Plantae-  
Arabidopsis\_thaliana\_15237567:0.09028451423160728517,((Plantae-  
Arabidopsis\_thaliana\_18424775:0.00255101151606240912,Plantae-  
Arabidopsis\_thaliana\_42573784:0.00451548961458517542)100:0.23214084764215675571,(Plantae-  
Arabidopsis\_thaliana\_15237589:0.12419158374869412875,Plantae-  
Arabidopsis\_thaliana\_42567747:0.19544552593058142631)64:0.03759457703359345843)100:0.14312883752271859938)97:0.  
07919089750148368412,(Plantae-Oryza\_sativa\_115487678:0.08349054712807121859,Plantae-  
Oryza\_sativa\_115487676:0.17558139572121594929)100:0.11364430194481991987)100:0.14523371068061438627)99:0.17213  
887449504314264,((Plantae-Ostreococcus\_tauri\_13112:0.18468937778015614981,Plantae-  
Ostreococcus\_lucimarinus\_4881:0.09004071529300770871)100:0.48686242867125512079,(Plantae-  
Volvox\_carteri\_65837\_jgi:0.10697820010474537455,Plantae-  
Chlamydomonas\_reinhardtii\_146533:0.11813665357022117008)100:0.32598314854278936936)43:0.07025717428051082847)  
33:0.05117459696733066277)66:0.10931390141255098447,(Plantae-  
Chondrus\_crispus\_Contig163\_2:0.73247291961582350339,(Plantae-

Cyanidioschyzon\_merolae\_CM198C:0.57793060726319800402,(Chromalveolata-Aureococcus\_anophagefferens\_70779:0.81012434977244174306,(Chromalveolata-Phaeodactylum\_tricornutum\_41875:0.49317911832080701950,Chromalveolata-Thalassiosira\_pseudonana\_263722:0.6063598878771114778)96:0.21617333972104590956)84:0.17620039527200087592)67:0.06837776701031117454)83:0.18746057605331276075)32:0.08520322793109362525)34:0.08282546450589953202)100:1.75385369745594021929,(Chlamydia-Chlamydia\_trachomatis\_15605507:0.00000121823947223981,Chlamydia-Chlamydia\_trachomatis\_76789516:0.00000121823947223981)100:0.07795904904215761322,Chlamydia-Chlamydia\_muridarum\_15834775:0.11165577515343927395)100:0.36526544848378372787)95:0.42817418002227314311,Chlamydia-Chlamydogadus\_felis\_89897974:0.05717520897506589428)74:0.03614982945106461065,Chlamydia-Chlamydogadus\_caviae\_29840606:0.05427036943543742109,Chlamydia-Chlamydogadus\_abortus\_62185419:0.10180727810348884355);

Plantae-Arabidopsis\_thaliana\_15240411

(((((Bacteria-Frankia\_alni\_111224492:1.23442248381510677468,Bacteria-Ruminococcus\_gnavus\_154505436:0.88314643369781797855)33:0.24229924514543804692,(Bacteria-Orientia\_tsutsugamushi\_148284671:0.59831145018328402152,Bacteria-Ehrlichia\_canis\_73667124:0.58269952676652114754)100:0.67862370150588902096,Bacteria-Corynebacterium\_jeikeium\_68535768:1.20446391170155298056)29:0.16703475293117200917)89:0.27471950130894373654,(Plantae-Arabidopsis\_thaliana\_30690468:0.00000121823947223981,Plantae-Arabidopsis\_thaliana\_15240411:0.00000121823947223981)23:0.00000121823947223981,(Plantae-Arabidopsis\_thaliana\_30690464:0.00000121823947223981,Plantae-Arabidopsis\_thaliana\_42573491:0.00000121823947223981)26:0.00000121823947223981)100:0.39818053259459523785,(Plantae-Oryza\_sativa\_115460648:0.63233159386929471690,Plantae-Oryza\_sativa\_115452527:0.43734440312226102732)96:0.20979931907933715984)95:0.32228647663332693485,Plantae-Physcomitrella\_patens\_64757:0.78034396392036664558)71:0.17017713161299505287)100:0.65418766454384269515,Chlamydia-Candidatus\_Proteochlamydia\_46446795:0.48479199085938756708)100:0.49468618672905378952,Chlamydia-Chlamydogadus\_felis\_89898431:0.06314768129728050294,Chlamydia-Chlamydogadus\_caviae\_29840147:0.00000121823947223981);

Plantae-Arabidopsis\_thaliana\_18395376

((((Bacteria-Psychromonas\_ingrahamii\_119944444:0.47144861409534727370,(Bacteria-Shewanella\_pealeana\_157961015:0.31354687895057592462,Bacteria-Oceanobacter\_sp.\_94500740:0.49813697459514977295)27:0.10634117960313325957,Bacteria-Aeromonas\_salmonicida\_145300348:0.19962852087761179254)16:0.03586764056944039686)27:0.06623337635316201011,(Bacteria-alpha\_proteobacterium\_114771622:0.51739674491496345787,(Bacteria-Photobacterium\_sp.\_89075074:0.27229026956723040298,Bacteria-Vibrio\_alginolyticus\_91227840:0.33510032725292898670)37:0.07699951889551388817,(Bacteria-Yersinia\_pseudotuberculosis\_51595120:0.14466599366734630983,Bacteria-Serratia\_proteamaculans\_157369071:0.12776365753911297918)100:0.28236877357227085916)16:0.05795561248334876736,(Bacteria-Actinobacillus\_succinogenes\_152979684:0.23318153309665623496,Bacteria-Haemophilus\_influenzae\_145631998:0.24635704308745887126)100:0.19071433591741213109)3:0.01625768556658750003,Bacteria-Pseudoalteromonas\_atlantica\_109900156:0.37707344453824653829)7:0.04419127472239695736)3:0.03795446813185249929)15:0.08809970523368308715,(Bacteria-marine\_gamma\_119504834:0.55296628852018092637,(Bacteria-Marinomonas\_sp.\_152995330:0.73246438662503055017,Bacteria-Pseudomonas\_stutzeri\_146281933:0.34426041190899014932)69:0.11632142515462612353)37:0.08398559953337897399,(Plantae-Cyanidioschyzon\_merolae\_CM115C:0.37042741449834254430,(Chromalveolata-Emiliania\_huxleyi\_UI-EH-IJ0-abji-21-0-UI.s1\_4:0.35405640720877740169,Plantae-Galdieria\_sulphuraria\_A4\_36H10\_2:0.35398286442149640152)33:0.08855498159889556298)35:0.05658249749767156611,(Plantae-Gracilaria\_changii\_120463063\_2:0.30252646025450485867,(Chromalveolata-Phaeodactylum\_tricornutum\_21829:0.13554095006663954837,Chromalveolata-Thalassiosira\_pseudonana\_3622:0.14239967105432305150)100:0.20752385322878783014)34:0.09678686195062752295,Chromalveolata-Aureococcus\_anophagefferens\_23670:0.26896315419995686646)14:0.06811843746113280251)56:0.14580050472499317404,(Chlamydia-Candidatus\_Proteochlamydia\_46445961:0.64216421916058841202,(Plantae-Ostreococcus\_lucimarinus\_24843:0.28048512489770338618,(Plantae-Volvox\_carteri\_84386\_jgi:0.01104209535545158487,Plantae-Chlamydomonas\_reinhardtii\_196604:0.08225208633715794249)100:0.24755045255382912561)82:0.09758321771985870030,(Plantae-Oryza\_sativa\_115441507:0.14891086090936575537,(Plantae-Arabidopsis\_thaliana\_18395376:0.14900570697919879315,(Plantae-Physcomitrella\_patens\_213502:0.01221630600365485042,Plantae-Physcomitrella\_patens\_144079:0.03651801208181743724)100:0.19494872189236039928)48:0.01912491871552266312)91:0.1

2394700493611503223)57:0.08569140739900900361)14:0.07047991274916211302)11:0.03106511267586604952,Chromalveo-  
lata-Alexandrium\_tamarensis\_Contig1446\_4:0.33268380529836955040)37:0.05736108295402472107,((Chlamydia-  
Chlamydomonas\_pneumoniae\_15836111:0.00000121823947223981,(Chlamydia-  
Chlamydomonas\_pneumoniae\_16752459:0.00000121823947223981,(Chlamydia-  
Chlamydomonas\_pneumoniae\_15618489:0.00000121823947223981,Chlamydia-  
Chlamydomonas\_pneumoniae\_33241934:0.00000121823947223981)31:0.00000121823947223981)13:0.00000121823947223981  
)100:0.18250762480516549702,((Chlamydia-Chlamydia\_muridarum\_15835361:0.07705333549596465881,(Chlamydia-  
Chlamydia\_trachomatis\_76789198:0.00000121823947223981,Chlamydia-  
Chlamydia\_trachomatis\_15605189:0.00000121823947223981)100:0.08958098912927106583)100:0.33187345338608470469,(  
Chlamydia-Chlamydomonas\_abortus\_62184805:0.07621294460429381412,(Chlamydia-  
Chlamydomonas\_caviae\_29839929:0.08599558715166655265,Chlamydia-  
Chlamydomonas\_felis\_89898652:0.06212968512648057301)80:0.04139012810548826915)100:0.13711397487764470648)72:0.0  
9386554485798757896)100:0.57841728633364197787)97:0.28655719517752487047,(Bacteria-  
Magnetococcus\_sp.\_117925957:0.74375592644928922859,(Bacteria-  
Xanthobacter\_autotrophicus\_154248322:0.57510814967656931351,Bacteria-  
Mariprofundus\_ferroxidans\_114777097:0.65204625880205435706)59:0.07507835564719579635)89:0.283124320991509303  
98,(Bacteria-Desulfotribacterium\_hafniense\_109647497:0.50958581226638388628,(Bacteria-  
Collinsella\_aerofaciens\_139438522:0.94531751787396922637,((Cyanobacteria-  
Prochlorococcus\_marinus\_str\_MIT\_9515\_123965752:0.11569807189710329398,(Cyanobacteria-  
Prochlorococcus\_marinus\_str\_MIT\_9312\_78778839:0.00609806653136689414,(Cyanobacteria-  
Prochlorococcus\_marinus\_str\_AS9601\_123968047:0.03047227160422297243,Cyanobacteria-  
Prochlorococcus\_marinus\_str\_MIT\_9301\_126695817:0.00708798238085806172)98:0.02461495027206177591)96:0.10481166  
644496452134)100:0.41346698407255094709,(((Cyanobacteria-  
Synechococcus\_sp.\_RS9916\_116073467:0.15515577678936515182,(Cyanobacteria-  
Synechococcus\_sp.\_CC9311\_113953866:0.19212779905368865263,((Cyanobacteria-  
Synechococcus\_sp.\_CC9902\_78185308:0.00869122690302375628,Cyanobacteria-  
Synechococcus\_sp.\_BL107\_116072811:0.00646808182770766075)100:0.17939994431720932000,Cyanobacteria-  
Synechococcus\_sp.\_WH\_8102\_33866381:0.09868338597503041598)77:0.04919424670313193165)64:0.022908022582009225  
64)71:0.03333475244186677455,(Cyanobacteria-  
Prochlorococcus\_marinus\_str\_MIT\_9303\_124022365:0.00533602828170379011,Cyanobacteria-  
Prochlorococcus\_marinus\_str\_MIT\_9313\_33863597:0.00949806692912004598)100:0.12449789804643453250)51:0.03391270  
331240450048,Cyanobacteria-  
Synechococcus\_sp.\_RS9917\_87123748:0.09511566873084741081)55:0.05370967269588187987,Cyanobacteria-  
Synechococcus\_sp.\_WH\_5701\_87302092:0.25144322718027622976)63:0.05598774367972630256,(Cyanobacteria-  
Prochlorococcus\_marinus\_str\_MIT\_9211\_84518498:0.21192228639672086588,Cyanobacteria-  
Prochlorococcus\_marinus\_subsp.\_marinus\_str\_CCMP1375\_33239905:0.24176061673945478669)73:0.0809497760320100484  
5)79:0.11631556280020367844)76:0.04531010153742157098,((Cyanobacteria-Synechococcus\_sp.\_JA-3-  
3Ab\_86606172:0.25189325939250728492,(((Cyanobacteria-  
Crocospaera\_watsonii\_WH\_8501\_67924037:0.15419072939119998766,Cyanobacteria-  
Synechocystis\_sp.\_PCC\_6803\_16331009:0.20750171359224875434)42:0.04242817900334203834,(Cyanobacteria-  
Trichodesmium\_erythraeum\_IMS101\_113474465:0.22168414140685591129,Cyanobacteria-  
Lynbya\_sp.\_PCC\_8106\_119483239:0.14142153941866955624)28:0.03826669729622926563)68:0.06487147620823396910,(  
Cyanobacteria-Nodularia\_spumigena\_CCY9414\_119510035:0.07754518593218666378,(Cyanobacteria-  
Nostoc\_sp.\_PCC\_7120\_17232659:0.00301368053339711893,Cyanobacteria-  
Anabaena\_variabilis\_ATCC\_29413\_75908630:0.00780265358076457846)99:0.07400642075071231507)100:0.1473683308857  
9115447)80:0.08113905824561135072,Cyanobacteria-Thermosynechococcus\_elongatus\_BP-  
1\_22298148:0.31360217195721351580)35:0.02776500454140467741)58:0.07623888923388173755,(Cyanobacteria-  
Gloeobacter\_violaceus\_PCC\_7421\_37522360:0.39439976156879807956,(Cyanobacteria-  
Synechococcus\_elongatus\_PCC\_6301\_56750857:0.01116128731629483471,Cyanobacteria-  
Synechococcus\_elongatus\_PCC\_7942\_81299492:0.00000121823947223981)100:0.21402294581877873147)29:0.03653005361  
648018617)73:0.08332738278599680082)99:0.28848841475370468057)67:0.15808651211772714595,(Bacteria-  
Listeria\_welshimeri\_116871619:0.53532656047289606249,(Bacteria-  
Bacillus\_amyloliquefaciens\_154684608:0.32039826171671770272,Bacteria-  
Geobacillus\_thermodenitrificans\_138893760:0.31687559384917202143)54:0.07432544198250469469)100:0.222012125147001  
11034,((Bacteria-Symbiobacterium\_thermophilum\_51894258:0.47850125937747728377,(Bacteria-  
Bacteroides\_capillosus\_154497964:0.60310165424553607849,Bacteria-  
Thermosinus\_carboxydvorans\_121535692:0.29023171357505855861)34:0.07697751144224454500)33:0.14094826819590744  
460,(Bacteria-Syntrophomonas\_wolfei\_114567867:0.52996811674752652976,Bacteria-  
Moorella\_thermoacetica\_83591303:0.43352504227057520048)42:0.12816882846291358100)4:0.04853046505404697009,(((B  
acteria-Pelobacter\_carbinolicus\_77917721:0.26529029715620361385,Bacteria-  
Desulfuromonas\_acetoxidans\_95929124:0.34614357539699119881)96:0.18515899798242507757,Bacteria-  
Geobacter\_uraniumreducens\_148266173:0.31943216972285903843)75:0.15868528851851179673,(Bacteria-



Alkaliphilus\_metalliredigens\_150392188:0.48324431920889987513,(Bacteria-  
Clostridium\_perfringens\_110803205:0.47919478402374743320,(Bacteria-  
Eubacterium\_ventriosum\_154483094:0.40820734493586463554,(Bacteria-  
Dorea\_longicatena\_153856040:0.41965292720029401252,Bacteria-  
Ruminococcus\_gnavus\_154502854:0.18633444519790220983)96:0.12890449242552362574)81:0.13330722767948030572)71:  
0.12935328081743180384)31:0.05967060593065264679)6:0.04289941683126283212,(Bacteria-  
Dehalococcoides\_ethenogenes\_57233576:0.58219853499733631441,(Bacteria-  
Syntrophobacter\_fumaroxidans\_116749072:0.59590265209065618190,(Bacteria-  
Solibacter\_usitatus\_116620981:0.60849793576327859679,(Bacteria-  
delta\_proteobacterium\_94263737:0.53515596172120871721,Bacteria-  
Desulfotalea\_psychrophila\_51244109:0.44257219282377907588)69:0.13426742953171860728)26:0.11710061755990237853)6  
:0.04163118078787234749,(Bacteria-Syntrophus\_aciditrophicus\_85859809:0.45611996147464112239,(Bacteria-  
Lactobacillus\_casei\_116494597:1.17599079642140069701,Bacteria-  
Carboxydotherrmus\_hydrogenoformans\_78043736:0.93378229716059646393)8:0.04940192105388534899,(Bacteria-  
Cytophaga\_hutchinsonii\_110639473:0.41009457293366885500,Bacteria-  
Microscilla\_marina\_124008760:0.35905757867079629575)100:0.44604685213206285432)19:0.07685256378632643326)7:0.06  
344867671712194068)2:0.05037643769996497101)1:0.06690726882114894636)0:0.05093028540628854323)4:0.04963289273  
194793766)3:0.02847546974174226808)4:0.03362293574941853380)2:0.01873425865646077826,(Bacteria-  
Desulfotomaculum\_reducens\_134298065:0.39526410186191218710,Bacteria-  
Pelotomaculum\_thermopropionicum\_147676624:0.36602299450128100711)80:0.14806433648677358450)8:0.06618116192197  
928682)13:0.04583249222349643909)88:0.17718191114326001245,Bacteria-  
Psychrobacter\_sp.\_148653459:0.70758204367197308216)95:0.27724560785222818193)28:0.06195073067410042378,Bacteria-  
Alteromonadales\_bacterium\_119468983:0.48263779465046124928);

Plantae-Arabidopsis\_thaliana\_18396215

((((Cyanobacteria-Nostoc\_punctiforme\_PCC\_73102\_23128764:0.02540840998443057164,(Cyanobacteria-  
Nodularia\_spumigena\_CCY9414\_119513395:0.04693748624034605604,(Cyanobacteria-  
Nostoc\_sp.\_PCC\_7120\_17231883:0.00000121823947223981,Cyanobacteria-  
Anabaena\_variabilis\_ATCC\_29413\_75909491:0.00000121823947223981)100:0.07157307212745864233)54:0.0234143771833  
0478118)93:0.06212514429610464101,(Cyanobacteria-  
Trichodesmium\_erythraeum\_IMS101\_113475683:0.15539775430824781521,(((Cyanobacteria-  
Synechococcus\_sp.\_WH\_5701\_87300686:0.09989752547201567745,(((Cyanobacteria-  
Prochlorococcus\_marinus\_str.\_MIT\_9313\_33864147:0.00000121823947223981,Cyanobacteria-  
Prochlorococcus\_marinus\_str.\_MIT\_9303\_124024202:0.00414179747575596415)100:0.06145940441408788424,(Cyanobacteri  
a-Synechococcus\_sp.\_CC9311\_113955167:0.02179560049938040686,(((Cyanobacteria-  
Synechococcus\_sp.\_WH\_7805\_88808064:0.00829899713397501231,Cyanobacteria-  
Synechococcus\_sp.\_WH\_7803\_148238604:0.00000121823947223981)78:0.01387624601312129578,Cyanobacteria-  
Synechococcus\_sp.\_RS9917\_87123059:0.02351766524235401543)54:0.00610634724521529493,(Cyanobacteria-  
Synechococcus\_sp.\_RCC307\_148243388:0.02116438146653241981,(Cyanobacteria-  
Synechococcus\_sp.\_CC9902\_78183830:0.00857705360368886741,Cyanobacteria-  
Synechococcus\_sp.\_BL107\_116071561:0.00409901212491606444)96:0.02465369429247122809,(Cyanobacteria-  
Synechococcus\_sp.\_WH\_8102\_33864761:0.00421598627739433896,Cyanobacteria-  
Synechococcus\_sp.\_CC9605\_78211771:0.00000121823947223981)99:0.00639730816989434424)97:0.03018682474847673644  
)73:0.02050153578436885934,Cyanobacteria-  
Synechococcus\_sp.\_RS9916\_116075574:0.00711955297964624034)78:0.03197060913172927038)28:0.0087114391016101123  
3)54:0.02952648699433812335)27:0.01206794904115603834,((Cyanobacteria-  
Prochlorococcus\_marinus\_subsp.\_marinus\_str.\_CCMP1375\_33239766:0.04667833385539917751,Cyanobacteria-  
Prochlorococcus\_marinus\_str.\_MIT\_9211\_84518644:0.02972853241877811831)31:0.02651155480725414862,((Cyanobacteria-  
Prochlorococcus\_marinus\_str.\_MIT\_9515\_123965550:0.02481557939306060223,(Cyanobacteria-  
Prochlorococcus\_marinus\_str.\_MIT\_9312\_78778669:0.00417799876902441667,(Cyanobacteria-  
Prochlorococcus\_marinus\_str.\_MIT\_9301\_126695644:0.00410032809879689979,(Cyanobacteria-  
Prochlorococcus\_marinus\_str.\_AS9601\_123967842:0.01240883764269817315,Cyanobacteria-  
Prochlorococcus\_marinus\_subsp.\_pastoris\_str.\_CCMP1986\_33860840:0.00820810815413561788)27:0.00000121823947223981  
)63:0.01233566584379889794)38:0.00000121823947223981)100:0.08901062363596845550,(Cyanobacteria-  
Prochlorococcus\_marinus\_str.\_NATL1A\_124025075:0.00000121823947223981,Cyanobacteria-  
Prochlorococcus\_marinus\_str.\_NATL2A\_72383484:0.00405068427533424123)100:0.04379216006327996819)13:0.003202326  
32416135414)29:0.02018008074927401738)96:0.06897702822831032476)99:0.12829535702449745838,(((Chlamydia-  
Candidatus\_Proteochlamydia\_46446786:0.16337078849605821129,(((Chromalveolata-  
Plasmodium\_falciparum\_86171049:0.61970692758041512338,(((Chromalveolata-  
Phaeodactylum\_tricornutum\_10068:0.04918917661558808163,Chromalveolata-  
Thalassiosira\_pseudonana\_32860:0.08496171824524567651)93:0.07919796982517976480,Chromalveolata-  
Aureococcus\_anophagefferens\_19845:0.13895462801302976841)44:0.02310185586525940679,(((Chromalveolata-

Toxoplasma\_gondii\_122921324:0.00000121823947223981,Chromalveolata-  
Toxoplasma\_gondii\_34555736:0.00000121823947223981)42:0.00000121823947223981,Chromalveolata-  
Toxoplasma\_gondii\_122921325:0.00000121823947223981)83:0.00000121823947223981,(Chromalveolata-  
Toxoplasma\_gondii\_122921416:0.00000121823947223981,Chromalveolata-  
Toxoplasma\_gondii\_122921415:0.00000121823947223981)89:0.00000121823947223981)100:0.21231400470078662379)35:0.  
03325626798020533265,Chromalveolata-  
Isochrysis\_galbana\_ISE00008579\_3:0.17576477359389086619)72:0.04522977928493889660)56:0.07038451240073305415,(((  
Chlamydia-Chlamydophila\_pneumoniae\_15835939:0.00000121823947223981,(Chlamydia-  
Chlamydophila\_pneumoniae\_16752634:0.00000121823947223981,Chlamydia-  
Chlamydophila\_pneumoniae\_15618321:0.00000121823947223981)18:0.00000121823947223981)17:0.00000121823947223981  
,Chlamydia-Chlamydophila\_pneumoniae\_33241753:0.00000121823947223981)100:0.03176415355419537345,(((Chlamydia-  
Chlamydia\_trachomatis\_15604823:0.00000121823947223981,Chlamydia-  
Chlamydia\_trachomatis\_76788818:0.00000121823947223981)100:0.02961182953488699851,Chlamydia-  
Chlamydia\_muridarum\_15834999:0.01295876598059629917)99:0.05929253405135464366,(Chlamydia-  
Chlamydophila\_caviae\_29840151:0.01265364044753804207,Chlamydia-  
Chlamydophila\_felis\_89898427:0.03025589395702240475)91:0.01801872717670233506,Chlamydia-  
Chlamydophila\_abortus\_62185007:0.0565597243319398423997:0.06508756637043974780)85:0.03776495357122770097)100:  
0.20171157171354983650)20:0.02811652168608399713,(((Rhizaria-  
Bigelowiella\_natans\_DR039063\_2:0.25620725527644910846,(Plantae-  
Volvox\_carteri\_83516\_jgi:0.01822610628035757629,Plantae-  
Chlamydomonas\_reinhardtii\_122688:0.14833769446872024922)100:0.11934457256455030527)38:0.04993565459775249626,(  
Plantae-Ostreococcus\_tauri\_28591:0.04881814640159715113,Plantae-  
Ostreococcus\_lucimarinus\_32790:0.05189545094247557250)77:0.09012319412959035603)75:0.05556156337460863709,(((Pla  
ntae-Arabidopsis\_thaliana\_18396215:0.00000121823947223981,Plantae-  
Arabidopsis\_thaliana\_30678246:0.00000121823947223981)100:0.08035770246531336036,(Plantae-  
Oryza\_sativa\_115475922:0.04179305416702477211,Plantae-  
Oryza\_sativa\_115478314:0.03780659648150160729)100:0.04913814936907244524)93:0.05191943259660181109,(Plantae-  
Physcomitrella\_patens\_119545:0.02097883214970002602,Plantae-  
Physcomitrella\_patens\_132935:0.05455306825412724325)99:0.10125980276020535298)49:0.05280653155856844527)39:0.06  
077693332847258767)19:0.03007289280841004067)100:0.93367202953851091696,Cyanobacteria-  
Gloeobacter\_violaceus\_PCC\_7421\_37523757:0.24090518768696242424)71:0.10888549459182697565,(((Bacteria-  
Mariprofundus\_ferrooxydans\_114777289:0.41077748011727549526,(Bacteria-  
Pelobacter\_carbinolicus\_77919640:0.18453849833715627038,Bacteria-  
Desulfuromonas\_acetoxidans\_95931158:0.14465928905010314032)100:0.19117951849248454588)84:0.116172826376604226  
84,(((Bacteria-Desulfovibrio\_desulfuricans\_78356053:0.17293987426097581772,Bacteria-  
Lawsonia\_intracellularis\_94986794:0.25641129229123305056)100:0.20992821410926038039,(((Bacteria-  
Hydrogenobaculum\_sp.\_156718930:0.44308381292970594467,((Bacteria-  
Xanthobacter\_autotrophicus\_154247184:0.08899021576123349042,Bacteria-  
Methylobacterium\_sp.\_149123892:0.16828204094846005434)100:0.32021249546515673234,(((Bacteria-  
Dechloromonas\_aromatica\_71906617:0.47885600089877627950,Bacteria-  
Azoarcus\_sp.\_119898421:0.45323699647875009822)70:0.12864607051564394546,(Bacteria-  
Pseudomonas\_stutzeri\_146281083:0.40394171426392888602,Bacteria-  
Acidovorax\_avenae\_120610730:0.20768416936675748730)59:0.11794035006268234478)20:0.04105760498038270312,Bacteri  
a-  
Polaromonas\_naphthalenivorans\_121583099:0.42617390655410308797)19:0.08008715839716418206)100:0.263647887411173  
89792)26:0.07820060051687605096,Bacteria-  
Marinobacter\_aquaeolei\_120554462:0.48739358138628097183)11:0.05606549440525675221,(((Bacteria-  
Parvibaculum\_lavamentivorans\_154251242:0.18712512240739823111,(((Bacteria-  
Rhodospirillum\_rubrum\_83593956:0.21082055038932612234,Bacteria-  
Stappia\_aggregata\_118591455:0.37886130756792757435)35:0.05299320987899178159,((Bacteria-  
Roseobacter\_denitrificans\_110680382:0.10241314965644765511,(Bacteria-  
Sagittula\_stellata\_126731271:0.10849292099378009258,Bacteria-  
Paracoccus\_denitrificans\_119383609:0.16191479278839909783)28:0.02108542324305436727)21:0.03390228854904950295,B  
acteria-  
Oceanicola\_granulosus\_89068843:0.07694270728322624708)99:0.11745882535330244567)22:0.03113415607887919101,((Ba  
cteria-Fulvimarina\_pelagi\_114707939:0.18152393785070353172,(Bacteria-  
Agrobacterium\_tumefaciens\_15888100:0.0877922304778250688,Bacteria-  
Sinorhizobium\_medicae\_150395736:0.04407704906801849370)78:0.05025921188593035493)82:0.04135879304209685858,(B  
acteria-Mesorhizobium\_sp.\_110633084:0.14051193844729337190,((Bacteria-  
Rhodopseudomonas\_palustris\_39934274:0.03531692871355492785,Bacteria-  
Bradyrhizobium\_japonicum\_27377740:0.09861852607543579452)73:0.06833937435580207664,(Bacteria-  
Bartonella\_bacilliformis\_121602192:0.14153695913375449744,(Bacteria-

Brucella\_ovis\_148560363:0.06104753643965380588,(Bacteria-  
Aurantimonas\_sp.\_90420122:0.08151832197158602467,Bacteria-  
Rhizobium\_leguminosarum\_116250784:0.13665089123149587458)32:0.01439833633565386177)69:0.03142820965915884418  
)88:0.05277328537895614041)40:0.03564079764915382281)30:0.05164538394211808797)39:0.03783898993194863281)8:0.0  
3456693713025703329)47:0.11265609501373421986,(Bacteria-  
Neorickettsia\_sennetsu\_88608759:0.41864681633346945144,Bacteria-  
Rickettsia\_typhi\_51473557:0.37939803076121841885)89:0.14611645541024237405)89:0.11491494483421439698,((Bacteria-  
Caminibacter\_mediterraneus\_149195105:0.24977140438977446513,((Bacteria-  
Helicobacter\_pylori\_108562614:0.26466023624305323736,Bacteria-  
Wolinella\_succinogenes\_34556852:0.15208995923216447888)73:0.07428770334690004695,(Bacteria-  
Campylobacter\_conciscus\_157165165:0.20783752687148918104,Bacteria-  
Thiomicrospira\_denitrificans\_78777945:0.20681786271061863847)39:0.04942443732218210900)12:0.01108542466850900507  
,Bacteria-  
Nitratiruptor\_sp.\_152991231:0.17365031074249559495)51:0.04806496627699624602)51:0.03888669766465757682,(Bacteria-  
Arcobacter\_butzeri\_157738335:0.08311246958133997054,Bacteria-  
Sulfurovum\_sp.\_152992312:0.12505318866504075426)100:0.16095539254956800490)100:0.12430168045168539515)64:0.11  
732900516960656501)4:0.03492023840386650896)8:0.08406188893946466012,(Bacteria-  
Roseiflexus\_castenholzii\_156743345:0.31680546784790902803,Bacteria-  
Herpetosiphon\_aurantiacus\_113941789:0.35386540440437497246)81:0.11341540949648599990)10:0.02437647384829337918  
)25:0.04932625084812038152,((Bacteria-Solibacter\_usitatus\_116626829:0.66876424295153757971,(Bacteria-  
Clostridium\_thermocellum\_125975647:0.37035637792622921882,Bacteria-  
Bacillus\_cereus\_152974732:0.24186995134671498975)55:0.08603860691376270797)49:0.06822893204737276451,((Bacteria-  
Symbiobacterium\_thermophilum\_51894063:0.38798731957477400334,Bacteria-  
Acidobacteria\_bacterium\_94970306:0.40489968834979112033)41:0.10680188692177813858,(Chromalveolata-  
Phytophthora\_sojae\_137179:0.78194449123160780779,(Bacteria-  
Thermus\_thermophilus\_55980273:0.14640245206807839251,Bacteria-  
Deinococcus\_geothermalis\_94984368:0.38734639748929394765)100:0.23934277478989898769)52:0.12734765431030692362)  
11:0.05371562840229358177)12:0.03737829814457056116)70:0.21532432345978200217)82:0.05683301241276633720,(Plant  
ae-Cyanidioschyzon\_merolae\_CMT381C:0.35319921182040470153,(Cyanobacteria-Synechococcus\_sp.\_JA-2-3Ba2-  
13\_86608636:0.04471214140026957828,Cyanobacteria-Synechococcus\_sp.\_JA-3-  
3Ab\_86606338:0.00682148272663900788)100:0.20363200856994465027)54:0.05066815307418634506)64:0.07151179792420  
844783)66:0.06774363298887724205,(Cyanobacteria-Thermosynechococcus\_elongatus\_BP-  
1\_22299236:0.18868652259008844574,(Cyanobacteria-  
Synechococcus\_elongatus\_PCC\_6301\_56751387:0.00408948712054983156,Cyanobacteria-  
Synechococcus\_elongatus\_PCC\_7942\_81298937:0.00000121823947223981)100:0.12656204545728938493)29:0.02617067882  
961570183)51:0.07361557159420491214,Cyanobacteria-  
Lyngbya\_sp.\_PCC\_8106\_119484731:0.10590206647860976596)29:0.03446282396603933540)57:0.02489384414661652625)9  
2:0.07028953732532042253,(Cyanobacteria-  
Crocospaera\_watsonii\_WH\_8501\_67925372:0.05178250662210150818,Cyanobacteria-  
Cyanotheca\_sp.\_CCY0110\_126660445:0.03656608456474170349)100:0.09194920224135406939,Cyanobacteria-  
Synechocystis\_sp.\_PCC\_6803\_16329628:0.18995741883595176902);

Plantae-Arabidopsis\_thaliana\_18396238

(Plantae-Physcomitrella\_patens\_190433:0.15640942236438115653,(Plantae-  
Physcomitrella\_patens\_59338:0.24795282304051152744,((Plantae-  
Oryza\_sativa\_115470080:0.46857360174914158835,Plantae-  
Arabidopsis\_thaliana\_15235543:0.55276826155804759111)100:0.37747075546528852108,((Chlamydia-  
Candidatus\_Protoclamydia\_46446753:1.90303196891456072315,(Bacteria-  
Granulibacter\_bethesdensis\_114326726:0.96142292501717496744,Bacteria-  
Methylobacterium\_extorquens\_153898673:0.89811491112473584852)100:0.96064971849082103628,Bacteria-  
Sinorhizobium\_medicae\_150377140:1.37450964762918270701)87:0.44052746483474425343)100:0.86128985204082031402,((  
Plantae-Arabidopsis\_thaliana\_15237478:0.10352357494798256066,Plantae-  
Arabidopsis\_thaliana\_15232143:0.08524038286161485234)100:0.24003594856780041678,(Plantae-  
Oryza\_sativa\_115474573:0.26890684379749246746,Plantae-  
Arabidopsis\_thaliana\_18396238:0.42874950584178045387)25:0.06680508516101099636)92:0.25556573479354749434)65:0.1  
1939211311018980977)98:0.36048037086754980418,Plantae-  
Physcomitrella\_patens\_16888:0.26371659511798656306)49:0.03984845765614593305)89:0.10411001295498471808,Plantae-  
Physcomitrella\_patens\_151210:0.15673619512293132661);

Plantae-Arabidopsis\_thaliana\_18408421

(Bacteria-Haemophilus\_influenzae\_145629620:0.06653823201336148130,((Bacteria-  
Escherichia\_coli\_110642447:0.02118545810239788954,((Bacteria-

Serratia\_proteamaculans\_157368448:0.03829123025908183486,Bacteria-  
Yersinia\_enterocolitica\_123440604:0.03209746320738906394)93:0.04290337347293807918,Bacteria-  
Klebsiella\_pneumoniae\_152971184:0.03836899174635374082)34:0.02108654205982908592,Bacteria-  
Enterobacter\_sakazakii\_156933153:0.03767943841841138453)49:0.01945635484054130879)98:0.06872090156310543818,((((  
Bacteria-Bacillus\_weihenstephanensis\_89206181:0.23257794606691847838,((Bacteria-  
Clavibacter\_michiganensis\_148271582:0.63691928626787153167,((Bacteria-  
Shigella\_flexneri\_31983644:0.39013501891069990446,Bacteria-  
Streptococcus\_agalactiae\_22537582:0.28393601173917104585)100:0.65903420258654243913,((Bacteria-  
Photobacterium\_profundum\_90414501:0.02971803766137730285,((Bacteria-  
Vibrio\_parahaemolyticus\_153836851:0.05235587909107222715,((Bacteria-  
Citrobacter\_koseri\_157144301:0.00445028582277629675,Bacteria-  
Salmonella\_enterica\_62182278:0.00544477609609505826)99:0.08287704604425116806,Bacteria-  
Aeromonas\_salmonicida\_145298404:0.12256012531519731856)92:0.07407466678307651764)64:0.03826932539852875154)1  
00:0.40855335509100554336,(Bacteria-Staphylococcus\_aureus\_148266646:0.32614436970276561301,((Bacteria-  
Actinomyces\_odontolyticus\_154508774:0.71946979680990563732,Bacteria-  
Listeria\_monocytogenes\_153173750:0.51628866054027966470)25:0.04776013395363205849)70:0.18995821335873971925)10  
0:0.88853870595913175823,((Bacteria-Bacteroides\_thetaiotaomicron\_29345606:1.20240280703199808876,((((Chromalveolata-  
Phaeodactylum\_tricornutum\_43611:0.12724988066883155535,Chromalveolata-  
Thalassiosira\_pseudonana\_22565:0.19631438881616583569)100:0.49214800781393602813,Chromalveolata-  
Aureococcus\_anophagefferens\_71036:0.83756561543665430936)100:0.71496707328919306690,(((Opisthokonta-  
Mus\_musculus\_23346457:0.37597234667887208248,(Opisthokonta-  
Danio\_rerio\_47087636:0.21285387306718642209,Opisthokonta-  
Mus\_musculus\_31560349:0.16864264472495366087)70:0.07411668351738937011)100:0.18914589348062280094,(Opisthoko  
nta-Apis\_mellifera\_66530901:0.34947612263891669748,(Opisthokonta-  
Drosophila\_melanogaster\_24656866:0.00000121823947223981,(Opisthokonta-  
Drosophila\_melanogaster\_45550478:0.00000121823947223981,Opisthokonta-  
Drosophila\_melanogaster\_24656861:0.00000121823947223981)35:0.00000121823947223981)100:0.39634424261535999845)9  
9:0.18115003965919260209)100:0.17968863463687559379,((Plantae-  
Chlamydomonas\_reinhardtii\_144519:0.11462530840594391257,Plantae-  
Volvox\_carteri\_57773\_jgi:0.09874179188240254923)100:0.43434724901742105541,((Plantae-  
Ostreococcus\_lucimarinus\_29537:0.07500620986956044178,Plantae-  
Ostreococcus\_tauri\_21081:0.12767938233270298420)100:0.32415714962264430277,((Plantae-  
Oryza\_sativa\_115447643:0.42714405775676106414,Plantae-  
Arabidopsis\_thaliana\_30684088:0.24658304588852295036)68:0.08025470457868587315,((Plantae-  
Physcomitrella\_patens\_55740:0.11151566347366353993,Plantae-  
Physcomitrella\_patens\_2560:0.06170822126694196219)100:0.24121518783443821055,((Plantae-  
Oryza\_sativa\_115466748:0.41319151344048848928,Plantae-  
Arabidopsis\_thaliana\_30678883:0.28190945987452764587)100:0.27165051086213742870,((Plantae-  
Arabidopsis\_thaliana\_15234973:0.08029528656276516130,Plantae-  
Arabidopsis\_thaliana\_15221441:0.09960356129931847990)100:0.30369591483430274925,((Plantae-  
Oryza\_sativa\_115459830:0.18611712887756531876,Plantae-  
Arabidopsis\_thaliana\_18408421:0.18623263876559847940)54:0.05860304294957225518,Plantae-  
Oryza\_sativa\_115474855:0.25883104351587626901)65:0.04711236215661595422)89:0.07754669538778545534)26:0.0608160  
0221166774678)17:0.03443480104949405568)24:0.07975247288432314730)29:0.07772775084275461432)63:0.125490402584  
31556905)97:0.39935889927630768836,(((Plantae-Ostreococcus\_tauri\_12406:0.60624901770302497273,Plantae-  
Ostreococcus\_lucimarinus\_31082:0.49160331517587307903)100:1.66450182068097141119,((Chromalveolata-  
Tetrahymena\_thermophila\_118394637:0.46457232087311606250,Chromalveolata-  
Tetrahymena\_thermophila\_118354920:0.47862669120732703743)100:0.33141116044511786942,((Chromalveolata-  
Tetrahymena\_thermophila\_118401808:1.02241515201331401030,Chromalveolata-  
Tetrahymena\_thermophila\_118366967:0.50692558850694768857)62:0.13277474336830799584,((Chromalveolata-  
Tetrahymena\_thermophila\_118400994:0.62871284255880632852,Chromalveolata-  
Tetrahymena\_thermophila\_118375659:0.76229833926369827690)100:0.68586797811350652676,((Chromalveolata-  
Paramecium\_tetraurelia\_124426426:0.43379016704517803227,((Chromalveolata-  
Paramecium\_tetraurelia\_124416855:0.00000121823947223981,((Chromalveolata-  
Paramecium\_tetraurelia\_124403291:0.11322397919870355598,Chromalveolata-  
Paramecium\_tetraurelia\_124429506:0.35178678434524918162)93:0.04701885434627032373)100:0.43985016372029517306)1  
00:0.82945638359480711177,(Chromalveolata-Paramecium\_tetraurelia\_124427774:0.04204324704649028271,Chromalveolata-  
Paramecium\_tetraurelia\_124407176:0.00000121823947223981)100:1.13003416330478367868)32:0.11607222797858406105)2  
1:0.08394009736244534281)34:0.09571697333926036666)100:0.47760196243252484027)19:0.06618454002264384517,(Opist  
hokonta-Mus\_musculus\_71143150:0.65259355456303957954,Chromalveolata-  
Phytophthora\_sojae\_139174:1.04281679759789258632)91:0.22846033213182184718)34:0.06976397143262301481)61:0.1972  
8259272483125719)90:0.36666094469618715213,((Plantae-Ostreococcus\_tauri\_19202:0.14581342002739303143,Plantae-

Ostreococcus\_lucimarinus\_94723:0.05414153634382160712)100:1.29925691908956286724,(Bacteria-Pseudomonas\_aeruginosa\_116049513:1.38700284935910400641,(Bacteria-Burkholderia\_pseudomallei\_126443546:0.34770504575109284495,Bacteria-Stigmatella\_aurantiaca\_115377967:0.61698093678029963804)100:1.92723589020778374170)22:0.10375988728374607728)14:0.08174560545389270017)98:0.39689989863947977566)88:0.23426037043579225894,(Plantae-Ostreococcus\_lucimarinus\_30179:1.10074493185965871511,(Chlamydia-Candidatus\_Protoclhamydia\_46446021:0.33469962382897261444,(Chlamydia-Chlamydia\_muridarum\_15835445:0.03354499637832321357,(Chlamydia-Chlamydia\_trachomatis\_76789281:0.00000121823947223981,Chlamydia-Chlamydia\_trachomatis\_15605273:0.00000121823947223981)100:0.02426978307470135238)100:0.10610747564796818576,((Chlamydia-Chlamydophila\_abortus\_62184720:0.02785796132801323516,Chlamydia-Chlamydophila\_caviae\_29839842:0.03188543464404589023)87:0.01649829304436933181,Chlamydia-Chlamydophila\_felis\_89898737:0.01406507340175266844)68:0.04177699895818504094,((Chlamydia-Chlamydophila\_pneumoniae\_16752375:0.00000121823947223981,Chlamydia-Chlamydophila\_pneumoniae\_15618575:0.00000121823947223981)20:0.00000121823947223981,(Chlamydia-Chlamydophila\_pneumoniae\_15836197:0.00000121823947223981,Chlamydia-Chlamydophila\_pneumoniae\_33242022:0.00000121823947223981)18:0.00000121823947223981)100:0.14336174509130297783)30:0.03177862594071571845)100:0.23441915381688721576)82:0.22142153018475543846)98:0.20685140220625289342)60:0.13296284120329773804)77:0.12198062890030626770)57:0.11039091125978231500)74:0.19350928355673233106,((Bacteria-Clostridium\_novyi\_118444722:0.18754914620199283903,Bacteria-Francisella\_tularensis\_110670313:0.70042319051336798807)82:0.14086197078471032751,(Bacteria-Leptospira\_borgpetersenii\_116329394:0.91201115410849409315,Bacteria-Thermosinus\_carboxydvorans\_121535100:0.21785111660871217532)64:0.16974497175706390606)49:0.10105103885511503015)65:0.09198141662149954267)99:0.14975543636322416474,Bacteria-marine\_gamma\_119477676:0.36548095783443029783)89:0.10206144918466816818,Bacteria-Pseudoalteromonas\_atlantica\_109899603:0.20258154343746304082)69:0.06266876424741996132,(Bacteria-Moritella\_sp.\_149909897:0.08728946062824674557,Bacteria-Vibrionales\_bacterium\_148981435:0.07519200173912700402)100:0.09297637096360192310)87:0.11767301580647783477,Bacteria-Chromobacterium\_violaceum\_34495708:0.15877440991538338544)78:0.08925690830861963965)100:0.43103436140234402396,Bacteria-Actinobacillus\_succinogenes\_152978273:0.09487626540058188840);

Plantae-Arabidopsis\_thaliana\_18410414

((((Plantae-Volvox\_carteri\_59132\_jgi:0.18957986950897084966,Plantae-Chlamydomonas\_reinhardtii\_196478:0.09999392261327769149)100:0.45624131567620346273,(Plantae-Ostreococcus\_tauri\_20960:0.17429941720813182937,Plantae-Ostreococcus\_lucimarinus\_88889:0.11860674828263888247)100:0.64832187009451380799)100:0.14149746041913865979,(Plantae-Oryza\_sativa\_115464401:0.32184895924314987914,Plantae-Arabidopsis\_thaliana\_18410414:0.36268909146699757073)100:0.35417147701205520249,Chlamydia-Candidatus\_Protoclhamydia\_46445958:1.07080610454793445641);

Plantae-Arabidopsis\_thaliana\_18418270

((((Chlamydia-Chlamydia\_muridarum\_15835284:0.11286901775690690031,(Chlamydia-Chlamydia\_trachomatis\_15605115:0.00000121823947223981,Chlamydia-Chlamydia\_trachomatis\_76789121:0.00000121823947223981)100:0.10830246368024658288)100:0.28746437055569051822,((Chlamydia-Chlamydophila\_pneumoniae\_15618406:0.00000121823947223981,Chlamydia-Chlamydophila\_pneumoniae\_16752548:0.00000121823947223981)20:0.00000121823947223981,(Chlamydia-Chlamydophila\_pneumoniae\_15836026:0.00000121823947223981,Chlamydia-Chlamydophila\_pneumoniae\_33241846:0.00000121823947223981)20:0.00000121823947223981)100:0.43465143100138114995,((Bacteria-Ralstonia\_pickettii\_153888148:0.60526640268370668352,Bacteria-Limnobacter\_sp.\_149927771:0.47996328660551679235)100:1.06242327643160505701,((Bacteria-Bacillus\_amyloliquefaciens\_154687887:0.55419029302012179361,((Bacteria-Listeria\_welshimeri\_116871680:0.24400577327833186669,(Bacteria-Streptococcus\_thermophilus\_116627354:0.27666688681598916588,Bacteria-Lactobacillus\_reuteri\_92088613:0.18898617026440273081)93:0.07587377365043880550,Bacteria-Leuconostoc\_mesenteroides\_116617192:0.25735449449012010037)97:0.14456430452418317367)80:0.10612141242506721583,(Plantae-Physcomitrella\_patens\_158207:0.34356337768577976943,Bacteria-Geobacillus\_thermodenitrificans\_138894510:0.18327061249746356975)44:0.04982387385064261653)89:0.21445897145701592335)100:0.25056507255135984646,(((Bacteria-Hyphomonas\_neptunium\_114798447:0.23287593294955122314,((Bacteria-Sphingomonas\_sp.\_94495925:0.07343098367184414110,Bacteria-Sphingopyxis\_alaskensis\_103485999:0.01904044337678284515)100:0.05816295180481969446,Bacteria-Erythrobacter\_sp.\_149186438:0.13423610069084146446)100:0.21968679366831342370)45:0.05720927379794367440,(((Bact

eria-Ochrobactrum\_anthropi\_153009246:0.00304721932744037808,Bacteria-  
Brucella\_ovis\_148559151:0.01346026943012510087)100:0.06813354802632920482,(Bacteria-  
Mesorhizobium\_sp.\_110634273:0.07604149724246531128,(Bacteria-  
Sinorhizobium\_medicae\_150396667:0.02582763243016675259,(Bacteria-  
Rhizobium\_etli\_86357503:0.02337920211642816049,Bacteria-  
Agrobacterium\_tumefaciens\_15888903:0.04810837956737772092)47:0.00997903725951900140)99:0.05254369616000410803)  
40:0.01269977465345626354)95:0.03787499766756535075,(Bacteria-  
Fulvamarina\_pelagi\_114707058:0.14720327355068787978,Bacteria-  
Aurantimonas\_sp.\_90419167:0.10064102201326625974)90:0.07014106560769148291)98:0.07638016685821825968,(Bacteria-  
Methylobacterium\_sp.\_149120131:0.11406549455914069546,Bacteria-  
Xanthobacter\_autotrophicus\_154247450:0.09878465085876987628)98:0.07902218361536665625)73:0.0458789920752475377  
5)100:0.57896874442004453432,((Cyanobacteria-Synechococcus\_sp.\_JA-2-3Ba2-  
13\_86608738:0.03516127173559494695,Cyanobacteria-Synechococcus\_sp.\_JA-3-  
3Ab\_86605900:0.04096926311841735113)100:0.13641714058080869898,(((Cyanobacteria-  
Nostoc\_punctiforme\_PCC\_73102\_23128688:0.02813013312242954034,(Cyanobacteria-  
Nodularia\_spumigena\_CCY9414\_119512462:0.03451262388571309930,(Cyanobacteria-  
Anabaena\_variabilis\_ATCC\_29413\_75906242:0.00395355093503886416,Cyanobacteria-  
Nostoc\_sp.\_PCC\_7120\_17230257:0.00452886188780086876)95:0.04843346429051389318)54:0.00796305573241419713)86:0.  
05056009442392113418,(Cyanobacteria-Lyngbya\_sp.\_PCC\_8106\_119486833:0.14698275535155866378,Cyanobacteria-  
Trichodesmium\_erythraeum\_IMS101\_113474811:0.11992170670164060964)85:0.06482162266957666730)81:0.057989449605  
47589705,(Cyanobacteria-Synechocystis\_sp.\_PCC\_6803\_16331407:0.21108740017702731784,Cyanobacteria-  
Thermosynechococcus\_elongatus\_BP-  
1\_22299593:0.13490526294506530181)61:0.04776289229673618547)73:0.08477944057344873052)100:0.4558451882360454  
1771)49:0.08276446361473499547,(((Bacteria-Syntrophus\_aciditrophicus\_85857917:0.51052802473844893782,Bacteria-  
Caldicellulosiruptor\_saccharolyticus\_146295811:0.82201784076075501417)39:0.15610667376105347159,(Bacteria-  
Halothermothrix\_oreni\_89209988:0.37186191229289267124,(Bacteria-  
Dehalococcoides\_ethenogenes\_57234493:0.45040573816028439680,(Bacteria-  
Moorella\_thermoacetica\_83589740:0.22259119593898130107,((Bacteria-  
Desulfotomaculum\_reducens\_134299551:0.17550310147258932347,Bacteria-  
Pelotomaculum\_thermopropionicum\_147678134:0.21976732253639397197)99:0.09775546549026400966,Bacteria-  
Carboxydotherrmus\_hydrogeniformans\_78045045:0.17380665777590273424)89:0.06390275750998379578)87:0.106258773686  
17266117)46:0.05492408018799152525)29:0.03962970816055593620)12:0.06793078444726424747,((Bacteria-  
Syntrophobacter\_fumaroxidans\_116747505:0.34732790052928169677,(Bacteria-  
Hydrogenobaculum\_sp.\_156719834:0.35102841685574742714,Bacteria-  
Desulfobivrio\_desulfuricans\_78357013:0.35526515108919448638)77:0.10423867490385485546)75:0.10196237913547676057,  
(Cyanobacteria-Gloeobacter\_violaceus\_PCC\_7421\_37523677:0.23666004188704267697,(((Cyanobacteria-  
Nostoc\_sp.\_PCC\_7120\_17231819:0.01740227809971516340,Cyanobacteria-  
Anabaena\_variabilis\_ATCC\_29413\_75907500:0.02462924263473174197)100:0.12505096834761558755,Cyanobacteria-  
Lyngbya\_sp.\_PCC\_8106\_119485467:0.21395542985648205447)59:0.04830586689070065498,Cyanobacteria-  
Trichodesmium\_erythraeum\_IMS101\_113474355:0.28006644037084887922)57:0.06065215776167971751)100:0.28796819589  
819228069)25:0.03119565438758615736)46:0.11501974917941086562)53:0.13960689180883412153)100:0.305356460161579  
85683)100:0.75605353189072588282,(Chlamydia-  
Candidatus\_Proteochlamydia\_46446319:0.42159674968331278810,((Plantae-  
Cyanophora\_paradoxa\_Contig1999\_6:0.26402102811614563960,(((Plantae-  
Arabidopsis\_thaliana\_18397344:0.34874849153542636371,Plantae-  
Oryza\_sativa\_115451309:0.23971587250950568415)90:0.11871881145627954934,((Plantae-  
Arabidopsis\_thaliana\_18418270:0.10561601148804122818,Plantae-  
Oryza\_sativa\_115452503:0.06784274787907063065)90:0.06055011781241657204,Plantae-  
Physcomitrella\_patens\_121808:0.15327817658785122812)43:0.05263960734900963861)90:0.09601474839891313562,((Planta  
e-Ostreococcus\_tauri\_22755:0.14357988479963260109,Plantae-  
Ostreococcus\_lucimarinus\_30412:0.02904085644726243920)100:0.28105450486397653975,(Plantae-  
Volvox\_carteri\_81843\_jgi:0.00455270255117826150,Plantae-  
Chlamydomonas\_reinhardtii\_129557:0.05406560458219782095)100:0.17120355905850700995)71:0.07893976310662341456)  
73:0.09672178824793237206,(Plantae-Galdieria\_sulphuraria\_A4\_33D11\_2:0.30116543806236212300,(Plantae-  
Cyanidioschyzon\_merolae\_CMN323C:0.24364224565621231400,(((Chromalveolata-  
Aureococcus\_anophagefferens\_36703:0.23809498795533473592,(Chromalveolata-  
Phaeodactylum\_tricornutum\_22909:0.11928928571552679938,Chromalveolata-  
Thalassiosira\_pseudonana\_31394:0.09415822499347728525)96:0.06938981530520774155)93:0.08644121826098324912,Chro  
malveolata-Pavlova\_lutheri\_Contig338\_2:0.17648650351345862575)48:0.02940724008559220809,Chromalveolata-  
Laminaria\_digitata\_62990747\_2:0.20428412716334504173)61:0.07288140123472465481)48:0.05518410698349311000)48:0.0  
5755281137168213879)34:0.02664353097188303446)33:0.05741503363498230011,Chromalveolata-  
Guillardia\_theta\_57335937:0.35899138540886799120)28:0.03052495186889479101)92:0.18814019699833464672,((Cyanobact

eria-Lyngbya\_sp\_PCC\_8106\_119488916:0.32240503571154860429,Bacteria-  
Beggiatoa\_sp\_153868447:0.44302818981955832678)100:0.39634899006036439228,((Bacteria-  
Desulfotalea\_psychrophila\_51246017:0.44347827828464958522,Bacteria-  
Candidatus\_Desulfococcus\_121542099:0.27461605626297691529)95:0.18291457964671536951,(((Bacteria-  
Parabacteroides\_merdae\_154492519:0.30956465965836943433,(Bacteria-  
Desulfobacterium\_hafniense\_109648263:0.20468179086534643574,(Bacteria-  
Lawsonia\_intracellularis\_94986878:0.41410117604357610244,Bacteria-  
Thermosinus\_carboxydvorans\_121535392:0.09481365820503168118)24:0.02992687889355696157)49:0.05297754312121435  
299)77:0.09201522735382879070,(Bacteria-Bacteroides\_capillosus\_154499894:0.26845924561684997300,(Bacteria-  
Ruminococcus\_obeum\_153813418:0.14910973874028904396,(Bacteria-  
Dorea\_longicatena\_153852917:0.15716351163519687306,(Bacteria-  
Eubacterium\_ventriosum\_154483444:0.08625666668629079770,Bacteria-  
Clostridium\_phytofermentans\_106886313:0.13309938067151955154)92:0.06786035727127107120)53:0.053947341376302276  
88)100:0.19431987158248587022)59:0.05899925967733590793)37:0.02577332942268668534,(Bacteria-  
Leptospira\_interrogans\_24213476:0.31745739153641644448,((Bacteria-  
delta\_proteobacterium\_94264240:0.15049955658835059702,(Bacteria-  
Desulfuromonas\_acetoxidans\_95928626:0.12039808835545773302,(Bacteria-  
Geobacter\_metallireducens\_78221437:0.03991316121051127763,Bacteria-  
Pelobacter\_propionicus\_118581464:0.05304648365561217410)100:0.13321266328566971904)100:0.07385151492721585276)  
100:0.13983369718362939627,((((Cyanobacteria-  
Prochlorococcus\_marinus\_str\_MIT\_9301\_126697029:0.02018770252388078432,(Cyanobacteria-  
Prochlorococcus\_marinus\_str\_AS9601\_123969235:0.01849443900149560366,Cyanobacteria-  
Prochlorococcus\_marinus\_str\_MIT\_9312\_78779976:0.03434500354498570829)60:0.01535654674521491625)98:0.059422560  
20165586489,(Cyanobacteria-Prochlorococcus\_marinus\_str\_MIT\_9515\_123966913:0.07544315290315180278,Cyanobacteria-  
Prochlorococcus\_marinus\_subsp\_pastoris\_str\_CCMP1986\_33862056:0.06408891906468694444)97:0.07470422144668970033  
)100:0.18537332282305374331,(Cyanobacteria-  
Prochlorococcus\_marinus\_str\_NATL1A\_124026646:0.01567209032683201941,Cyanobacteria-  
Prochlorococcus\_marinus\_str\_NATL2A\_72382904:0.00000121823947223981)100:0.13964372243172137877)53:0.073081684  
88589160405,(Cyanobacteria-  
Prochlorococcus\_marinus\_subsp\_marinus\_str\_CCMP1375\_33241104:0.14071267677664894835,Cyanobacteria-  
Prochlorococcus\_marinus\_str\_MIT\_9211\_84519195:0.15256591481074405214)33:0.01632373308435457887)42:0.051394495  
95281309069,(((Cyanobacteria-Synechococcus\_sp\_CC9311\_113953665:0.07109131763280038263,(Cyanobacteria-  
Synechococcus\_sp\_RS9916\_116075700:0.01989190536954008742,(Cyanobacteria-  
Prochlorococcus\_marinus\_str\_MIT\_9303\_124024065:0.00465166904201762092,Cyanobacteria-  
Prochlorococcus\_marinus\_str\_MIT\_9313\_33864058:0.00611533976538845229)100:0.10078966888866287832)91:0.02066429  
813130424981)31:0.01394449819012867631,Cyanobacteria-  
Synechococcus\_sp\_RS9917\_87125031:0.06101175975978519184)57:0.01592884540015874692,(((Cyanobacteria-  
Synechococcus\_sp\_WH\_7805\_88807953:0.02716316126622536631,Cyanobacteria-  
Synechococcus\_sp\_WH\_7803\_148238706:0.00640076461091729741)93:0.01512300182080985461,((Cyanobacteria-  
Synechococcus\_sp\_CC9902\_78185598:0.01893897878584576908,Cyanobacteria-  
Synechococcus\_sp\_BL107\_116072121:0.00000121823947223981)100:0.07150270458340851620,Cyanobacteria-  
Synechococcus\_sp\_CC9605\_78211863:0.02409286176439429800)50:0.01011752069797824255)36:0.00704781700860726296  
,Cyanobacteria-  
Synechococcus\_sp\_WH\_8102\_33866679:0.03145389714278354343)81:0.02484217907952679036,Cyanobacteria-  
Synechococcus\_sp\_RCC307\_148243278:0.08538248035304515926)57:0.02192388750482839044)67:0.037283226372411597  
26,Cyanobacteria-  
Synechococcus\_sp\_WH\_5701\_87301876:0.08157749579407395923)89:0.04251358674225867024)73:0.097490441172695688  
21,((((Cyanobacteria-Anabaena\_variabilis\_ATCC\_29413\_75908571:0.00245151993415336153,Cyanobacteria-  
Nostoc\_sp\_PCC\_7120\_17232595:0.01340962637991552873)100:0.02829081904301637349,Cyanobacteria-  
Nostoc\_punctiforme\_PCC\_73102\_23124300:0.04158792442309919984)60:0.00704675135319387299,Cyanobacteria-  
Nodularia\_spumigena\_CCY9414\_119512643:0.05008254645354308365)78:0.01778307930338187542,(((Cyanobacteria-  
Cyanotheca\_sp\_CCY0110\_126657512:0.01871340883713615288,Cyanobacteria-  
Crocospaera\_watsonii\_WH\_8501\_67924273:0.04027601526937501369)100:0.06693816448466453906,Cyanobacteria-  
Lyngbya\_sp\_PCC\_8106\_119492452:0.06545351579199092107)51:0.01581217472722076453,Cyanobacteria-  
Trichodesmium\_erythraeum\_IMS101\_113476813:0.08512184903681048465)52:0.01743485057434285626)48:0.024867971884  
97471070,Cyanobacteria-  
Synechocystis\_sp\_PCC\_6803\_16331785:0.13429233778580101921)73:0.03776410326642763021,(Cyanobacteria-  
Synechococcus\_elongatus\_PCC\_6301\_56750696:0.00000121823947223981,Cyanobacteria-  
Synechococcus\_elongatus\_PCC\_7942\_81299662:0.00000121823947223981)100:0.08688915080114852085)35:0.02676558616  
371362692,((Cyanobacteria-Synechococcus\_sp\_JA-2-3Ba2-13\_86608889:0.03319244105594772870,Cyanobacteria-  
Synechococcus\_sp\_JA-3-3Ab\_86607082:0.02089857985029158066)100:0.12268415747164117258,Cyanobacteria-  
Thermosynechococcus\_elongatus\_BP-

1\_22299645:0.11322229397739250190)64:0.03215189041027573941)98:0.06082438753904149953)99:0.12760756190197430  
904)59:0.03442984072646353144)38:0.03245678755226725359)14:0.01778812591844788904)100:0.18558674986589926426)  
93:0.13727883681503499913)59:0.09277449672389863344)100:0.43266438287476011171)51:0.11425924130929351885)91:0.  
12805783495200276367,(Chlamydia-Chlamydomonada\_abortus\_62184887:0.12369303747148806261,Chlamydia-  
Chlamydomonada\_caviae\_29840016:0.10984304768429874188)42:0.03012350418388727580,Chlamydia-  
Chlamydomonada\_felis\_89898564:0.06218348185414238755);

Plantae-Arabidopsis\_thaliana\_22328517

((Chlamydia-Chlamydia\_muridarum\_15834932:0.09682261641741785052,((Chlamydia-  
Candidatus\_Proteochlamydia\_46446740:0.51713836569528637277,Plantae-  
Cyanidioschyzon\_merolae\_CMS197C:0.72973414219393917257)56:0.09008500147685889747,((Plantae-  
Physcomitrella\_patens\_177616:0.26792690189846440907,(Plantae-  
Arabidopsis\_thaliana\_22328517:0.14829948140729945494,Plantae-  
Oryza\_sativa\_115479679:0.20725509117328044795)100:0.14751272700191964127)100:0.09966241245877700827,((Plantae-  
Ostreococcus\_tauri\_35733:0.07151037089411566017,Plantae-  
Ostreococcus\_lucimarinus\_19757:0.10888231975996966183)100:0.30373965175526324023,(Plantae-  
Volvox\_carteri\_117715\_jgi:0.11442421127801828684,Plantae-  
Chlamydomonada\_reinhardtii\_132067:0.17421018741813315556)100:0.36280377191555107652)51:0.05544068031091507059)  
100:0.34208029718341287362,((Bacteria-Treponema\_denticola\_42525620:0.79075559141384277329,Bacteria-  
delta\_proteobacterium\_94271193:0.58208873503544500405)21:0.08711038522177860788,((Bacteria-  
Psychromonas\_ingrahamii\_119944654:0.44010087200413061659,Cyanobacteria-  
Synechococcus\_sp.\_CC9605\_78212359:0.39493104283132812737)100:0.18831012407164912648,(Bacteria-  
Burkholderia\_phymatum\_118031470:0.47076275237986925370,Bacteria-  
Syntrophobacter\_fumaroxidans\_116750378:0.32134283375282962636)100:0.22920144220684818270)98:0.0858732480474840  
9923,((Bacteria-Aeromonas\_hydrophila\_117621011:0.62666106104903673835,((Bacteria-  
Acidobacteria\_bacterium\_94970322:0.30973167697787229447,(Bacteria-  
Solibacter\_usitatus\_116622006:0.24736611024673477166,Cyanobacteria-  
Synechococcus\_sp.\_WH\_5701\_87303008:0.30459292035796403653)84:0.06785674136669887779)91:0.062834757823813772  
17,(Bacteria-Pelobacter\_propionicus\_118578861:0.21832543456348452171,Bacteria-  
Geobacter\_bemidjiensis\_145618532:0.24268004339808599279)100:0.10337734404296768098)99:0.10702163647644051536)4  
6:0.05462665113503403780,Bacteria-  
Photobacterium\_profundum\_90412499:0.59771179244148842091)45:0.07236791752772575581,((Cyanobacteria-  
Lyngbya\_sp.\_PCC\_8106\_119483335:0.28488858961427704353,Cyanobacteria-  
Trichodesmium\_erythraeum\_IMS101\_113475562:0.28537067750264138999)99:0.09264374793949309295,(Cyanobacteria-  
Synechococcus\_sp.\_PCC\_6803\_16329290:0.28485703773312365250,(Cyanobacteria-  
Crocosphaera\_watsonii\_WH\_8501\_67920688:0.07882102656861975087,Cyanobacteria-  
Cyanosphaera\_sp.\_CCY0110\_126658778:0.06048014805142547246)100:0.19956889609035521893)71:0.0547324245313932089  
6)90:0.07315970604559743351,((Cyanobacteria-  
Prochlorococcus\_marinus\_subsp.\_marinus\_str.\_CCMP1375\_33240852:0.23911632134611138234,Cyanobacteria-  
Prochlorococcus\_marinus\_str.\_MIT\_9211\_84517554:0.24559837955188137948)100:0.22157719085943561321,((Cyanobacteri  
a-Prochlorococcus\_marinus\_str.\_MIT\_9313\_33863664:0.02242411223707175064,Cyanobacteria-  
Prochlorococcus\_marinus\_str.\_MIT\_9303\_124022279:0.01295606355130923294)100:0.18882239594879535183,((Cyanobacte  
ria-Synechococcus\_sp.\_CC9605\_78213610:0.10090439033938292113,(Cyanobacteria-  
Synechococcus\_sp.\_BL107\_116071209:0.02541219863554435021,Cyanobacteria-  
Synechococcus\_sp.\_CC9902\_78184154:0.01680197939972263160)100:0.08757362297846467414)100:0.167101359121056280  
98,((Cyanobacteria-Synechococcus\_sp.\_RS9917\_87123691:0.09985371665579598210,Cyanobacteria-  
Synechococcus\_sp.\_RS9916\_116073589:0.12583326114230414250)75:0.04947376124242333639,(Cyanobacteria-  
Synechococcus\_sp.\_CC9311\_113954322:0.17052572646646416143,(Cyanobacteria-  
Synechococcus\_sp.\_WH\_7805\_88807466:0.07801173414236844961,Cyanobacteria-  
Synechococcus\_sp.\_WH\_7803\_148240266:0.04633954748994115885)100:0.09278556996576912963)83:0.0387061281708409  
7268)94:0.07440430485197437049)58:0.04587296392501443582,(Cyanobacteria-  
Synechococcus\_sp.\_WH\_5701\_87303116:0.23782315301597650725,Cyanobacteria-  
Synechococcus\_sp.\_RCC307\_148241578:0.29109613844542364669)83:0.14168016914410228035)53:0.081085609873184694  
15)56:0.09896426887984292875)100:0.77269077365574767580,(Cyanobacteria-  
Synechococcus\_elongatus\_PCC\_6301\_56751427:0.00000121823947223981,Cyanobacteria-  
Synechococcus\_elongatus\_PCC\_7942\_81298897:0.00000121823947223981)100:0.20895029130233208625)56:0.19809774917  
360373214)37:0.06257739944540693933)99:0.17988455324187777040)93:0.12125832946612218055,(Bacteria-  
Methylococcus\_capsulatus\_53802413:0.71697945272329077770,((Bacteria-  
Thermosiphon\_melanesiensis\_150020446:0.09429645502720343520,Bacteria-  
Thermotoga\_lettingae\_157363006:0.17205375812083709142)100:0.18862683369114735532,Bacteria-  
Petrogona\_mobilis\_145622245:0.34697036056770985679)100:0.30593197037785507808,(Bacteria-  
Chloroflexus\_aggregans\_118048461:0.37833079225432691972,((Bacteria-



Rubrobacter\_xylanophilus\_108803168:0.26778107545742912965,(Bacteria-  
Rhodoferrax\_ferrireducens\_89900942:0.43353396233443064478,(Bacteria-  
Magnetococcus\_sp.\_117924812:0.39217850256177783086,Bacteria-  
Rhodospirillum\_rubrum\_83592941:0.35717151010444148085)64:0.07601532325904374054,(Bacteria-  
Magnetospirillum\_magneticum\_83312163:0.44077352226152188841,(((Bacteria-  
Methylobacterium\_chloromethanicum\_156452274:0.24523329429911908117,(Bacteria-  
Fulvimarina\_pelagi\_114704731:0.29710240353187195028,(Bacteria-  
Rhodopseudomonas\_palustris\_90422739:0.21570817626974314596,(Bacteria-  
Aurantimonas\_sp.\_90420728:0.14883051301266037036,Bacteria-  
Bradyrhizobium\_sp.\_146341960:0.12815986319023531248)100:0.12095068284934420988)57:0.04838421714042327737)26:0.  
02973556034533418602)42:0.04113840338918148265,Bacteria-  
Pseudomonas\_fluorescens\_70730249:0.26576202235525414608)68:0.06087615190584589470,Bacteria-  
Granulibacter\_bethedensis\_114328836:0.26169537199630871216)96:0.11689792797936326973,(Bacteria-  
Rhodobacter\_sphaeroides\_77463006:0.45692267769935274169,(Bacteria-  
Saccharophagus\_degradans\_90020635:0.54522708298785260705,Bacteria-  
Enterobacter\_sakazakii\_156936659:0.44737045393168961560)58:0.09820357653473278658)54:0.06069262095238171090)99:  
0.09838184010552264436)17:0.02344832321355207194)70:0.05875997921190359574)57:0.05713569578555008355)31:0.035  
22298141542960087,(((Cyanobacteria-  
Nodularia\_spumigena\_CCY9414\_119509674:0.17934818317200043603,((Cyanobacteria-  
Trichodesmium\_erythraeum\_IMS101\_113476935:0.16541842510471263528,Cyanobacteria-  
Lyngbya\_sp.\_PCC\_8106\_119493471:0.17659577427411252137)65:0.03749206097885779410,(Cyanobacteria-  
Nostoc\_punctiforme\_PCC\_73102\_23126243:0.09155731208554300504,Cyanobacteria-  
Nodularia\_spumigena\_CCY9414\_119513193:0.11746297928559026880)100:0.12698063591515781900)51:0.03224578795812  
566012)100:0.22430669021945595643,(Bacteria-Pedobacter\_sp.\_149278115:0.38726751810607956683,(Bacteria-  
Nitrosospira\_multiformis\_82702530:0.31552759226958271288,Bacteria-  
Nitrosococcus\_oceani\_77165217:0.23751772103728877039)53:0.04151568660063206795)28:0.03092478302516859720)66:0.0  
655517941791103032,(Bacteria-Streptomyces\_coelicolor\_21225613:0.30144191289571242720,(Bacteria-  
Actinomyces\_odontolyticus\_154508931:0.32366599134422890938,Bacteria-  
Bifidobacterium\_adolescentis\_119025701:0.32957890745100798524)85:0.05199607240325909707)94:0.062081003894757715  
02,(Bacteria-Thermobifida\_fusca\_72162290:0.33101978671519516340,(Bacteria-  
Mycobacterium\_smegmatis\_118473311:0.19243885555626052963,(Bacteria-  
Arthrobacter\_sp.\_116671455:0.13673509205266734523,Bacteria-  
Clavibacter\_michiganensis\_148272612:0.18737428340294862150)100:0.10529141658532185921)93:0.0722407556721101906  
7)42:0.03465056924498094437)67:0.09269960237628849242)39:0.07299078700676436826,(Bacteria-  
Acidothermus\_cellulolyticus\_117927889:0.51103004230776938321,(Bacteria-  
Deinococcus\_geothermalis\_94984648:0.42571875794269742332,(Bacteria-  
Anaeromyxobacter\_sp.\_153003973:0.35112599748725803472,(Bacteria-  
Myxococcus\_xanthus\_108757366:0.10413010047559373428,Bacteria-  
Stigmatella\_aurantiaca\_115372407:0.14044553178802762772)100:0.20317713362561534707)100:0.15733769014547452358)3  
4:0.04326214034547581910)18:0.03777828058171038561)48:0.08662611946626894155)32:0.05442251040899646897,Bacteri  
a-  
Salinibacter\_ruber\_83815924:0.55803127277879216450)63:0.05415846980359188129)100:0.38522958144638369538)28:0.075  
19403986920401850)6:0.03976369276432961675)3:0.04091971338653641738)32:0.06418584401041463328,((Bacteria-  
Beggiatoa\_sp.\_153871798:0.33216904681013798006,(Cyanobacteria-  
Synechocystis\_sp.\_PCC\_6803\_16330244:0.21716035412097203783,Cyanobacteria-  
Trichodesmium\_erythraeum\_IMS101\_113478340:0.13215401547247820901)100:0.15201608516364475965)99:0.12615541308  
265856846,(Bacteria-Clostridium\_beijerinckii\_150017328:0.28322930144103564132,Bacteria-  
Ruminococcus\_obeum\_153812634:0.43625460623152073625)100:0.32397568726396985817)100:0.23780181023474628033)1  
00:0.18579567782822906108)88:0.10673566899359779314)100:0.62075841741698822851,(((Chlamydia-  
Chlamydophila\_felis\_89898407:0.09109908455616430589,Chlamydia-  
Chlamydophila\_abortus\_62185023:0.10707205546629995629)71:0.03269484575927184694,Chlamydia-  
Chlamydophila\_caviae\_29840170:0.07983957524983777143)99:0.12399690480648815905,(Chlamydia-  
Chlamydophila\_pneumoniae\_33241733:0.00000121823947223981,((Chlamydia-  
Chlamydophila\_pneumoniae\_15618303:0.00000121823947223981,Chlamydia-  
Chlamydophila\_pneumoniae\_15835921:0.00000121823947223981)45:0.00000121823947223981,Chlamydia-  
Chlamydophila\_pneumoniae\_16752650:0.00000121823947223981)92:0.00000121823947223981)100:0.3317384699194211861  
2)88:0.09865224701190196399)100:0.23140292742944290616)100:0.05458428945791760772,Chlamydia-  
Chlamydia\_trachomatis\_15604761:0.00000121823947223981,Chlamydia-  
Chlamydia\_trachomatis\_76788755:0.00167643673321496889);

Plantae-Arabidopsis\_thaliana\_30684861

((Chlamydia-Chlamydomonas\_pneumoniae\_15618895:0.00000121823947223981,Chlamydia-Chlamydomonas\_pneumoniae\_33242355:0.00000121823947223981)33:0.00000121823947223981,Chlamydia-Chlamydomonas\_pneumoniae\_15836518:0.00000121823947223981)41:0.00000121823947223981,((Chlamydia-Chlamydomonas\_pneumoniae\_29840531:0.08797980277130081073,Chlamydia-Chlamydomonas\_pneumoniae\_89898047:0.06734921044525934986)100:0.16214734336762226530,(((Chromalveolata-Emiliania\_huxleyi\_UI-EH-HG2-abg-k-20-0-UI.sl\_5:1.05013942533947446378,(Chromalveolata-Thalassiosira\_pseudonana\_10198:0.59458770985072884052,Chromalveolata-Phaeodactylum\_tricornutum\_42440:0.53739599934672388493)99:0.52008558906697144320,(Plantae-Volvox\_carteri\_88325\_jgi:0.54978483521434007297,(Plantae-Ostreococcus\_tauri\_36724:0.95156428099240564222,(Plantae-Arabidopsis\_thaliana\_30684861:0.13778282402493893799,Plantae-Oryza\_sativa\_115464835:0.24588353370923513030)92:0.11087408932981095144,Plantae-Physcomitrella\_patens\_57897:0.41257598023834402001)97:0.24956336461793302006)10:0.06004125519887337781)16:0.05793230564278831207,(((Bacteria-Desulfotobacterium\_hafniense\_109645426:0.45481459854429928669,Bacteria-Desulfuromonas\_acetoxidans\_95928571:0.76937300288097121292)20:0.10022050845923717588,(Bacteria-Geobacter\_bemidjensis\_145620126:0.48351281410256807813,Bacteria-Pelobacter\_propionicus\_118579003:0.34603716829511910191)57:0.12496269208722662891,(Bacteria-Desulfotomaculum\_reducens\_134298946:0.37176262920324332217,Bacteria-Pelotomaculum\_thermopropionicum\_147677534:0.40578611761513433409)44:0.09615977638925296556)9:0.01753274956351632413)6:0.04383498713179669742,(((Bacteria-Thermosinus\_carboxydivorans\_121534492:0.71395432192844321406,Bacteria-Halothermothrix\_orenii\_89211509:0.40515370368332259687)2:0.07968726846456515578,(((Bacteria-Pediococcus\_pentosaceus\_116492413:0.35875463377736416248,Bacteria-Lactobacillus\_plantarum\_28378064:0.41000612522868318255)50:0.13355824405973040769,(Bacteria-Bacillus\_sp.\_126651273:0.30065977879278327212,(Bacteria-Listeria\_monocytogenes\_153202577:0.34968511170620486528,(Bacteria-Geobacillus\_thermodenitrificans\_138896384:0.35937560621437875108,Bacteria-Staphylococcus\_saprophyticus\_73662312:0.32585229983483354754)70:0.09329653035543561401)55:0.09070942268094538130)25:0.04319734502445263941)26:0.09179237427529483850,(Bacteria-Lactococcus\_lactis\_15674247:0.35872362541777547129,Bacteria-Streptococcus\_agalactiae\_22537547:0.36802679053576248247)84:0.11148109541011821944)11:0.06691099530508218263,(Bacteria-Clostridium\_difficile\_145954058:0.37315116484370630667,(Bacteria-Dorea\_longicatena\_153854162:0.41440707858218767123,Bacteria-Ruminococcus\_gnavus\_154503156:0.23704826749800914087)100:0.38062937942200603114)39:0.04793040540934627447)10:0.05221834417146267726)7:0.07550787539244536994,Bacteria-Carboxydotherrnus\_hydrogeniformans\_78043668:0.46965701206575499738)0:0.08517141981787766658,(Bacteria-Neisseria\_meningitidis\_15793917:0.41865365671878235210,Bacteria-Salinibacter\_ruber\_83814943:0.44699092916752225513)25:0.07395873668496914799)0:0.03946559292130174396)4:0.06127265410008530394,(Bacteria-Desulfovibrio\_desulfuricans\_78355142:0.54784843878020039742,Bacteria-Lawsonia\_intracellularis\_94986639:0.63430017007573824550)24:0.12220359540962519307)10:0.03342948619266872951,(Bacteria-Halorhodospira\_halophila\_121998449:0.68154094414078547626,Bacteria-Alkalilimnicola\_ehrlichei\_114320671:0.40182890108037089272)73:0.27607060875189987081)25:0.05850704749396330034)5:0.0998754889986277606)3:0.01720635547464643977)10:0.07982332791532907590,Plantae-Cyanidioschyzon\_merolae\_CMS370C:0.71009015268464348303)74:0.15017693855678998505,Chlamydia-Candidatus\_Protochlamydia\_46447254:0.55074590648402055315)100:0.37095491376136385808,((Chlamydia-Chlamydia\_trachomatis\_15605565:0.00000121823947223981,Chlamydia-Chlamydia\_trachomatis\_76789575:0.00000121823947223981)100:0.13632454961403084326,Chlamydia-Chlamydia\_muridarum\_15834837:0.04298300105777667218)95:0.10854787153905078034)71:0.16745557084900150602)100:0.31385074673566087933,Chlamydia-Chlamydomonas\_pneumoniae\_16752040:0.00000121823947223981);

Plantae-Arabidopsis\_thaliana\_30687613

(Plantae-Arabidopsis\_thaliana\_30687613:0.00000121823947223981,(((Excavata-Naegleria\_gruberi\_51690-fgeneshHS\_pg.scaffold\_47000084:1.30539753047465478808,((Chlamydia-Chlamydomonas\_pneumoniae\_15836443:0.00000121823947223981,((Chlamydia-Chlamydomonas\_pneumoniae\_15618819:0.00000121823947223981,Chlamydia-Chlamydomonas\_pneumoniae\_16752126:0.00000121823947223981)17:0.00000121823947223981,Chlamydia-Chlamydomonas\_pneumoniae\_33242273:0.00000121823947223981)23:0.00000121823947223981)100:0.16685475895384285772,((Chlamydia-Chlamydomonas\_pneumoniae\_29840615:0.06505688146614632683,(Chlamydia-Chlamydomonas\_pneumoniae\_62185427:0.08649672199412412887,Chlamydia-Chlamydomonas\_pneumoniae\_89897965:0.09667730167734163438)63:0.01096222303828774981)98:0.12307292230342928296,(Chlamydia-Chlamydia\_muridarum\_15834767:0.04911290580163828190,(Chlamydia-Chlamydia\_trachomatis\_76789508:0.00332571878601896917,Chlamydia-Chlamydia\_trachomatis\_15605499:0.00655776008668350341)100:0.05711449526290978546)100:0.25240598072208847436)3

7:0.06555197530768411274)100:0.50273245211473938099,Chlamydia-  
Candidatus\_Protoclhamydia\_46446877:0.35737121291623452635)65:0.19698835925479360465)72:0.22075285777713166135,  
((Bacteria-Thermus\_thermophilus\_46198512:0.68914191227555643415,Bacteria-  
Deinococcus\_geothermalis\_94984967:0.65788194232322017019)100:0.32118399806311881406,((Bacteria-  
Halorhodospira\_halophila\_121997464:0.50978080356625932179,((Bacteria-  
Methylococcus\_capsulatus\_53804021:0.34663370593696479771,Bacteria-  
Thiomicrospira\_crunogena\_78485429:0.69110282250899079948)39:0.11418171894247730602,(((Bacteria-  
Hahella\_chejuensis\_83648043:0.40959911328688375365,Bacteria-  
Marinobacter\_sp.\_126666950:0.39415252333323375078)41:0.12499410420961262758,(Bacteria-  
marine\_gamma\_90416480:0.60137757150294601782,((Bacteria-  
Psychromonas\_ingrahamii\_119946845:0.33745271114075908736,(Bacteria-  
alpha\_proteobacterium\_114773230:0.40331734064532598349,(Bacteria-  
Alteromonadales\_bacterium\_119468155:0.35428241225089818212,(Bacteria-  
Shewanella\_frigidimarina\_114564473:0.29568923807575220319,Bacteria-  
Pseudoalteromonas\_atlantica\_109900276:0.22603944778435872132)45:0.08841757715163119091)21:0.0556989975832629796  
7)7:0.03648626748718213769)34:0.09164169008057541921,(Bacteria-  
Pseudomonas\_fluorescens\_70734069:0.26054443050083481159,Bacteria-  
Oceanobacter\_sp.\_94500523:0.36935884884324754474)40:0.07722778028531206151)28:0.05502457887657324215)16:0.0493  
0240887472566585)22:0.05095493599829694492,((Bacteria-  
Polynucleobacter\_sp.\_145589940:0.65823936066319410632,((Bacteria-  
Neisseria\_meningitidis\_121634738:0.59267854480094361858,Bacteria-  
Chromobacterium\_violaceum\_34498844:0.34254192186661147623)31:0.09511437614911935623,((Bacteria-  
Ralstonia\_metallidurans\_94311841:0.22828212394586089307,Bacteria-  
Burkholderia\_pseudomallei\_76809606:0.23223632124696821921)64:0.06605039502551447728,(Bacteria-  
Bordetella\_bronchiseptica\_33603033:0.30415437747082985087,((Bacteria-  
Polaromonas\_sp.\_91789072:0.23475884787180964497,Bacteria-  
Rhodoferrax\_ferrireducens\_89900327:0.20537639328012174955)94:0.10340805745871306520,(Bacteria-  
Comamonas\_testosteroni\_118052499:0.25589900774746282552,Bacteria-  
Verminephrobacter\_eiseniae\_121611143:0.16853923262258349580)89:0.06984194384848027570)71:0.0539707327246545590  
1,Bacteria-  
Methylibium\_petroleiphilum\_124267223:0.27423331857646121579)100:0.17053445226455957173)39:0.040272901850603802  
51)74:0.06682110139815866656)20:0.10214954386133784370)43:0.08397817202900800804,(Bacteria-  
Nitrosomonas\_eutropha\_114330407:0.37011900233192174259,Bacteria-  
Nitrospira\_multiformis\_82701227:0.34686670274273567749)100:0.20782428771286165503)37:0.12577631514517717548)1  
7:0.07995130265694429250,Bacteria-  
Coxiella\_burnetii\_95927868:0.56327332186288270321)14:0.04664562331160519715,Bacteria-  
Nitrosococcus\_oceani\_77166049:0.47944967108203589978)10:0.04207775094055126591)80:0.09996578259476324169,(Bacte-  
ria-Xylella\_fastidiosa\_28198004:0.34072749462624746242,(Bacteria-  
Xanthomonas\_oryzae\_58582570:0.20118151129253558640,Bacteria-  
Stenotrophomonas\_maltophilia\_119877720:0.20807944460265009878)89:0.15191476661287728334)100:0.1914541695373703  
5004)66:0.04886502636165327568)100:0.21880863154226651290,(((Bacteria-  
Chloroflexus\_aggregans\_118047175:0.45122554539576770205,Bacteria-  
Roseiflexus\_sp.\_148657440:0.21028502934116505285)100:0.43799604114302065350,(Bacteria-  
delta\_proteobacterium\_94264315:0.78637015196100468195,(Bacteria-  
Desulfitobacterium\_hafniense\_89894333:0.77592808598915941065,(((Bacteria-  
Bacillus\_amyloliquefaciens\_154686146:0.36125687134675132928,Bacteria-  
Geobacillus\_thermodenitrificans\_138894831:0.23826059231303217678)98:0.21699478770738087063,(Bacteria-  
Clostridium\_novyi\_118444282:0.58242652835967267944,(Bacteria-  
Carboxydotherrus\_hydrogenoformans\_78043010:0.33802186987852134159,Bacteria-  
Thermoanaerobacter\_ethanolicus\_114843646:0.45058458318250027563)70:0.10411217293023290742)68:0.098787628493786  
52788)78:0.10958148460573507998,Bacteria-  
Pelotomaculum\_thermopropionicum\_147677679:0.57181443855631974849)71:0.07688055595318266100)77:0.1248392861512  
8224437)19:0.04628067244733394953)37:0.09664088185403409137,((Bacteria-  
Pelobacter\_propionicus\_118581368:0.38932914865853429642,Bacteria-  
Geobacter\_bemidjiensis\_145621179:0.35452531929545849643)100:0.22631779856114672689,(Bacteria-  
Candidatus\_Desulfococcus\_121541057:0.56865184937905122187,Bacteria-  
Syntrophobacter\_fumaroxidans\_116749353:0.49342652167447409450)73:0.08477563871652184224)46:0.11605059128953101  
877)33:0.10247398034568140635,(Bacteria-Acidobacteria\_bacterium\_94971585:0.86708479042129060765,(Bacteria-  
Myxococcus\_xanthus\_108761579:0.45936095521179232115,Bacteria-  
Anaeromyxobacter\_dehalogenans\_86157937:0.43523951096058344223)89:0.17691807085939964539)29:0.0785148569803003  
9040)59:0.08903878027485981339)56:0.09558625085873269367)99:0.27438244468977118773)84:0.20926797950170941687,  
(Plantae-Cyanidioschyzon\_merolae\_CMS475C:0.54836248447823865426,Chromalveolata-

Aureococcus\_anophagefferens\_61466:0.89302376160154361973)72:0.09024240087375463848)75:0.13835649337842323425,(  
Plantae-Volvox\_carteri\_90025\_jgi:0.78709821006630076301,(Plantae-  
Ostreococcus\_tauri\_33635:0.46949189148772391134,Plantae-  
Ostreococcus\_lucimarinus\_3723:0.18177615428149709875)100:0.56559970760469768791)59:0.11192256116321368242)56:0.  
06705862916778110305,(Plantae-Physcomitrella\_patens\_165772:0.29080727697141967036,(Plantae-  
Physcomitrella\_patens\_77322:0.14745099002119144149,(Plantae-  
Physcomitrella\_patens\_67435:0.17097712682166330000,(Plantae-  
Physcomitrella\_patens\_172286:0.16057595793870002576,Plantae-  
Physcomitrella\_patens\_95404:0.14340573164872560952)91:0.06084445779635179463)46:0.02928896368877680068)95:0.160  
88261689822536127,(Plantae-Physcomitrella\_patens\_231686:0.04217568634454531284,Plantae-  
Physcomitrella\_patens\_85626:0.22284311315308355517)100:0.53557303573803227703)86:0.12105063874742216790)91:0.19  
372094227224501140)100:0.21633800964203350747,Plantae-  
Oryza\_sativa\_115470104:0.26467229837404399051)100:0.26320330991227453010,Plantae-  
Arabidopsis\_thaliana\_22326902:0.00000121823947223981);

Plantae-Arabidopsis\_thaliana\_30687794

((((Cyanobacteria-Synechococcus\_sp.\_JA-2-3Ba2-13\_86607697:0.06672605904341068206,Cyanobacteria-  
Synechococcus\_sp.\_JA-3-3Ab\_86605480:0.06707299933037530471)100:0.28398737029398346543,((Cyanobacteria-  
Synechococcus\_elongatus\_PCC\_7942\_81299819:0.00000121823947223981,Cyanobacteria-  
Synechococcus\_elongatus\_PCC\_6301\_56750544:0.00000121823947223981)100:0.35603793521343712891,(Cyanobacteria-  
Prochlorococcus\_marinus\_str\_MIT\_9211\_84517829:0.84927867258801270633,((Cyanobacteria-  
Gloeobacter\_violaceus\_PCC\_7421\_37523966:0.42748615628831720947,Cyanobacteria-Thermosynechococcus\_elongatus\_BP-  
1\_22298198:0.33784628433101321354)38:0.08935776527260155810,((Cyanobacteria-  
Nostoc\_punctiforme\_PCC\_73102\_23125432:0.09801074014677642332,(Cyanobacteria-  
Nodularia\_spumigena\_CCY9414\_119513289:0.07345674749333316877,(Cyanobacteria-  
Nostoc\_sp.\_PCC\_7120\_17231365:0.01607507784996152836,Cyanobacteria-  
Anabaena\_variabilis\_ATCC\_29413\_75908041:0.02530957014534982938)98:0.10688733979681691588)69:0.05302336429727  
112083)97:0.22090194766162327134,((Cyanobacteria-  
Synechocystis\_sp.\_PCC\_6803\_16331284:0.32073049371448475453,(Cyanobacteria-  
Cyanotheca\_sp.\_CCY0110\_126659748:0.13395399469950314275,Cyanobacteria-  
Crocospaera\_watsonii\_WH\_8501\_67920373:0.04614848721779248736)100:0.15156947997130923445)85:0.11527831154724  
631213,Cyanobacteria-  
Trichodesmium\_erythraeum\_IMS101\_113475036:0.32197103364316986829)40:0.05854284551947368936)41:0.089952601275  
44908724)17:0.01945813359474423201)16:0.05278420805315253012)34:0.06228708867909880931)98:0.18687697933118813  
109,(((Bacteria-Hydrogenobaculum\_sp.\_156718477:0.60617477635622118992,Bacteria-  
Pedobacter\_sp.\_149280291:0.71162649812352440915)80:0.26236293510688057928,(Bacteria-  
Carboxydotherrmus\_hydrogenoformans\_78045168:0.37464870190504906411,Bacteria-  
Thermosinus\_carboxydvorans\_121535833:0.32082485919929332185)18:0.06507324313575518770)3:0.042387005311050621  
19,((Bacteria-Pelotomaculum\_thermopropionicum\_147677969:0.37614061719822006191,(Bacteria-  
Symbiobacterium\_thermophilum\_51892921:0.27144290336518833717,Bacteria-  
delta\_proteobacterium\_94263642:0.49940877504415465138)54:0.10410801377420154934)19:0.08767355766113610338,((Ba  
cteria-Caldicellulosiruptor\_saccharolyticus\_146296765:0.37686825284932773394,(((Plantae-  
Volvox\_carteri\_93239\_jgi:0.50966725633003651108,(((Chlamydia-  
Chlamydia\_trachomatis\_76789463:0.00000121823947223981,Chlamydia-  
Chlamydia\_trachomatis\_15605456:0.00000121823947223981)100:0.05917166432742073517,((Chlamydia-  
Chlamydophila\_abortus\_62185473:0.01957853503592776531,Chlamydia-  
Chlamydophila\_felis\_89897918:0.00582109705324843595)99:0.05921012212154695004,(Chlamydia-  
Chlamydophila\_pneumoniae\_15618773:0.00398557893782571036,((Chlamydia-  
Chlamydophila\_pneumoniae\_15836397:0.00000121823947223981,Chlamydia-  
Chlamydophila\_pneumoniae\_33242224:0.00000121823947223981)13:0.00000121823947223981,Chlamydia-  
Chlamydophila\_pneumoniae\_16752175:0.00000121823947223981)79:0.00000121823947223981)100:0.1146053106278395461  
4)77:0.09688107697678438601)100:0.51952501016903951392,Chlamydia-  
Candidatus\_Protoclhamydia\_46445794:0.44992856639214362513)59:0.13159770900772016500,(((Plantae-  
Oryza\_sativa\_115450787:0.41395680206253282485,(Plantae-  
Arabidopsis\_thaliana\_15229266:0.05455977798698625342,Plantae-  
Arabidopsis\_thaliana\_30687794:0.02573280824674500228)96:0.12321846019189032495)99:0.24240035139120669205,Plantae  
-Physcomitrella\_patens\_164744:0.29687943130465760389)98:0.13282854600156943081,(Plantae-  
Ostreococcus\_lucimarinus\_10314:0.09552341660247407051,Plantae-  
Ostreococcus\_tauri\_6904:0.04297731989140891884)100:0.51447115223272710249)84:0.11045788097740420752)43:0.086948  
47642380082453)95:0.27087909254417569249,Bacteria-  
Treponema\_denticola\_42526387:0.76874601225503880197)70:0.14375543212747901589,(Cyanobacteria-  
Prochlorococcus\_marinus\_subsp.\_pastoris\_str.\_CCMP1986\_33861215:0.08480802621665828323,(Cyanobacteria-

Prochlorococcus\_marinus\_str\_MIT\_9301\_126696606:0.03833746032974448548,Cyanobacteria-  
Prochlorococcus\_marinus\_str\_AS9601\_123968794:0.02031923998846420568)45:0.03887754212644547319)100:0.835967718  
67038144332)42:0.16666699613897778542,Bacteria-  
Clostridium\_botulinum\_148379772:0.40477292902087291804)10:0.08439143064698211016)26:0.16883588635864507643,((B  
acteria-Lactobacillus\_salivarius\_90961915:0.26630514425408530199,(Bacteria-  
Bacillus\_sp.\_89099642:0.41622191153753285153,Bacteria-  
Streptococcus\_thermophilus\_116628203:0.45090767846940288388)100:0.56256477424421724720)36:0.051214690334088201  
76,Bacteria-  
Leuconostoc\_mesenteroides\_116618395:0.46959599149747516256)38:0.07643183417892188136)6:0.08059532357317224227,  
((Bacteria-Leifsonia\_xyli\_50954353:0.10167807478304610735,(Bacteria-  
Clavibacter\_michiganensis\_148273158:0.12365198717670278228,Bacteria-  
marine\_actinobacterium\_88855489:0.21685001069649717520)61:0.04290007822585183844)100:0.37344918514583047564,(B  
acteria-Propionibacterium\_acnes\_50842867:0.36803304022592520095,(((Bacteria-  
Arthrobacter\_aurescens\_119962911:0.30164171726462235545,(Bacteria-  
Salinispora\_tropica\_145594471:0.39060095387749427243,(Bacteria-  
Rhodococcus\_sp.\_111017942:0.20278937128635080023,(Bacteria-  
Corynebacterium\_jeikeium\_68535954:0.36656161863259251188,Bacteria-  
Mycobacterium\_vanbaalenii\_120404251:0.16412961617097440725)69:0.07045171887641403508)92:0.0913975407099247017  
0)47:0.06392223061431305531)38:0.05089492409773543891,Bacteria-  
Frankia\_alni\_111221683:0.37169073982962302916)37:0.03936070371068154522,Bacteria-  
Thermobifida\_fusca\_72161610:0.30749799859879123343)31:0.04684689096890026078,Bacteria-  
Actinomyces\_odontolyticus\_154508819:0.36653123518237906708)67:0.11452579815463194424,Bacteria-  
Nocardioides\_sp.\_119716723:0.25456796487754096425)31:0.05721165725482278697)58:0.13985722027964392344)99:0.265  
16169832672320528)1:0.07845148650820300829)0:0.04291473371307147344)2:0.03993104180234685607,(Bacteria-  
Desulfuromonas\_acetoxidans\_95931320:0.53781506200024953301,(Bacteria-  
Bacteroides\_capillosus\_154497957:0.65470207845257177848,(Bacteria-  
Pelobacter\_propionicus\_118580486:0.26859146197938238432,Bacteria-  
Geobacter\_metalireducens\_78222432:0.24886929869310248087)78:0.05718470358171234141)64:0.14336696051341918379)  
12:0.05173105263630679157)1:0.06390118593232387012,(Bacteria-  
Desulfitobacterium\_hafniense\_89895026:0.44315540777495737723,(((Bacteria-  
Sphingomonas\_wittichii\_148555617:0.17979092908700630704,Bacteria-  
Erythrobacter\_litoralis\_85374350:0.26454098220646615758)100:0.25622515716146199161,(Bacteria-  
Methylobacterium\_sp.\_149125635:0.27527281714020263026,(Bacteria-  
Mesorhizobium\_sp.\_110632789:0.24726152570785586704,(Bacteria-  
Nitrobacter\_hamburgensis\_92118637:0.07389969655053447994,Bacteria-  
Bradyrhizobium\_sp.\_148253231:0.07833582981535655576)100:0.13998391310271346422)40:0.06970080612180128143)74:0.  
10155631322757467661,Bacteria-  
Rhodospirillum\_rubrum\_83591991:0.28623360970837619099)51:0.12165363387178845800)39:0.06983882968227904386,((C  
hromalveolata-Tetrahymena\_thermophila\_118369895:0.67981011585594663948,Excavata-Naegleria\_gruberi\_61621-  
fgeneshNG\_pg.scaffold\_1000555:0.63989030962986293005)88:0.20296881622050833016,Chromalveolata-  
Phytophthora\_sojae\_143343:0.65832629306083267906)31:0.11507353373445845801)100:0.34432821231790439187,((Bacteria  
-Azorcas\_sp.\_119898401:0.3571416614818274105,Bacteria-  
Chromobacterium\_violaceum\_34498841:0.32727883816017450114)77:0.10153125082307991323,((Bacteria-  
Thiomicrospira\_crunogena\_78485572:0.35795578747533662867,(Bacteria-  
alpha\_proteobacterium\_114772921:0.15324797086400018808,Bacteria-  
Pseudoalteromonas\_atlantica\_109899133:0.09782664387984042753)100:0.16593935017346539418)60:0.076076267237360190  
03,(Bacteria-Pseudomonas\_aeruginosa\_152987584:0.28174853929893767246,(Bacteria-  
Saccharophagus\_degradans\_90021367:0.32359281159302799580,Bacteria-  
Chromohalobacter\_salexigens\_92112979:0.28870656869627120411)28:0.04462711595205517967)50:0.0706526871353740926  
2)69:0.09331507664035902649)100:0.38320047671944434953)77:0.18653342618348719983)17:0.02988835328378612946)8:  
0.10756352454448069034,Bacteria-  
Aster\_yellows\_85057763:0.83904456855834275153)60:0.09806549191649578667)99:0.33010483463015227734,Bacteria-  
Lawsonia\_intracellularis\_94987310:0.46376205059111441642,Bacteria-  
Desulfovibrio\_desulfuricans\_78357001:0.36900693739070578037);

Plantae-Arabidopsis\_thaliana\_30688378

((Bacteria-Pseudomonas\_mendocina\_146305392:0.21363176200131248073,((((((Bacteria-  
Photobacterium\_sp.\_89075910:0.09855076091712013098,(Bacteria-  
Vibrionales\_bacterium\_148979387:0.03948190879146549342,Bacteria-  
Vibrio\_vulnificus\_27364078:0.02446905051846398615)99:0.06681475742224354808)100:0.12784331662059314483,(Bacteria  
-Actinobacillus\_pleurpneumoniae\_126208199:0.21594354676952853822,Bacteria-  
Haemophilus\_ducreyi\_33152441:0.21787548070571138847)100:0.17233133816968843055)91:0.06193628175937360147,(Bact

eria-Aeromonas\_salmonicida\_145297591:0.17711612997251685586,Bacteria-  
Moritella\_sp.\_149907766:0.18741213790542679551)44:0.02467545631569239423)92:0.06492779797763173488,((Bacteria-  
Shewanella\_frigidimarina\_114561752:0.16640976337682744646,(Bacteria-  
Pseudoalteromonas\_tunicata\_88858520:0.09867783567234802988,Bacteria-  
Alteromonadales\_bacterium\_119468107:0.08559674810687797897)100:0.09940576581001608902)72:0.048275054663182423  
44,Bacteria-  
Psychromonas\_ingrahamii\_119943967:0.13472679309553686755)92:0.05796401915515805164)96:0.12600064398176163971,(  
Bacteria-Legionella\_pneumophila\_148360770:0.75042551572606153165,((((Chlamydia-  
Chlamydia\_trachomatis\_76789432:0.00254675213807268371,Chlamydia-  
Chlamydia\_trachomatis\_15605425:0.00507805266924921377)100:0.05880597452154263938,Chlamydia-  
Chlamydia\_muridarum\_15834689:0.08750113131524621390)100:0.21947974510273929316,((Chlamydia-  
Chlamydophila\_felis\_89898751:0.02931880903162939825,(Chlamydia-  
Chlamydophila\_abortus\_62184708:0.03839870142701905242,Chlamydia-  
Chlamydophila\_caviae\_29839828:0.03398044674414053140)64:0.01750666999057030188)100:0.08791585152500398792,(((C  
hlamydia-Chlamydophila\_pneumoniae\_16752361:0.00000121823947223981,Chlamydia-  
Chlamydophila\_pneumoniae\_15618590:0.00000121823947223981)25:0.00000121823947223981,Chlamydia-  
Chlamydophila\_pneumoniae\_33242038:0.00000121823947223981)79:0.00000121823947223981,Chlamydia-  
Chlamydophila\_pneumoniae\_15836212:0.00501546538293586811)100:0.10960880371141847045)100:0.207528059151667138  
02)100:0.53453198220300068844,(Chlamydia-Candidatus\_Protorchlamydia\_46445733:0.32950003876438821449,(Plantae-  
Physcomitrella\_patens\_144831:0.13964379495938350484,(Plantae-  
Oryza\_sativa\_115447039:0.10568591948758930543,(Plantae-  
Arabidopsis\_thaliana\_30688383:0.00000121823947223981,Plantae-  
Arabidopsis\_thaliana\_30688378:0.00000121823947223981)100:0.07665326284023651904)100:0.15513396445285082548)100:  
0.55850039162135245441)88:0.09032321003832297079)93:0.16996593398705034383,((Plantae-  
Cyanidioschyzon\_merolae\_CMT476C:1.86053621442967198618,((Bacteria-  
Psychrobacter\_sp.\_148652597:0.25772018146142833261,Bacteria-  
Neisseria\_meningitidis\_121635484:0.21060923381404403343)81:0.05178778415074051372,(Bacteria-  
Campylobacter\_hominis\_154148399:0.30163577929885682094,(Bacteria-  
Mycobacterium\_bovis\_121638161:0.17027611185324620369,Bacteria-  
Corynebacterium\_jeikeium\_68535688:0.30391281656925528409)66:0.06597001678075233022)56:0.07568082299841370764)  
100:0.56853918974614858772,(Bacteria-Sulfurovum\_sp.\_152993850:0.25868933667280102906,(((Bacteria-  
alpha\_proteobacterium\_114769509:0.20732980381179980101,((Bacteria-  
Rhodobacterales\_bacterium\_126724755:0.09494102079438646036,(Bacteria-  
Silicibacter\_sp.\_99080449:0.09847820072792946855,(Bacteria-  
Sagittula\_stellata\_126730938:0.12416572444955417676,Bacteria-  
Paracoccus\_denitrificans\_119383417:0.18452058890133563041)82:0.05648419221018816799)72:0.03429565127342097675)9  
6:0.08031816483495941850,Bacteria-  
Roseobacter\_sp.\_126739952:0.10310251612167931068)85:0.04317939774741043346,(Bacteria-  
Rhodobacter\_sphaeroides\_126461611:0.17797146201793864750,Bacteria-  
Roseovarius\_sp.\_114763997:0.21514524502795867589)79:0.05406436508863177171)72:0.03180110089286147107)44:0.0246  
7529028685680817,(Bacteria-Stappia\_aggregata\_118588885:0.15621778963926308270,Bacteria-  
Mesorhizobium\_sp.\_110633686:0.28044130558440183432)56:0.04804209506848602235)67:0.05275920754187488765,Bacteri  
a-Hyphomonas\_neptunium\_114799704:0.19215581873262957413)81:0.08763012374305238772,(Bacteria-  
Rhodospirillum\_rubrum\_83593369:0.31876102434401187846,Bacteria-  
Aurantimonas\_sp.\_90419406:0.37367885846704784747)97:0.16033277021297911991)71:0.16607348728979162700,((Bacteri  
a-Thiomicrospira\_denitrificans\_78776703:0.29345540096740635461,Bacteria-  
Marinobacter\_algicola\_149377695:0.30381860018219980502)22:0.05171786573009929527,Bacteria-  
Wolinella\_succinogenes\_34558163:0.35756799830809238294)14:0.04285850480089947734,Bacteria-  
Nitratiruptor\_sp.\_152990317:0.21921626690568690732)24:0.05886010635795650703)34:0.09015859914353697990)100:0.393  
63864157830102952)72:0.12241770788681191617)49:0.08091349499698823056,((((Chromalveolata-  
Aureococcus\_anophagefferens\_10532:0.22012624850858616976,Chromalveolata-  
Aureococcus\_anophagefferens\_10551:0.13188761711994109738)100:0.36827347852741010303,(Plantae-  
Ostreococcus\_tauri\_8163:0.17376322188156098636,(Plantae-  
Ostreococcus\_lucimarinus\_36108:0.00467879340868943353,Plantae-  
Ostreococcus\_lucimarinus\_42057:0.01478033779969834156)100:0.12504737718757574783)100:0.25508325752924643215)10  
0:0.29259569581460853627,(((Excavata-Trypanosoma\_brucei\_115503937:0.01019038697345296847,Excavata-  
Trypanosoma\_brucei\_115503941:0.00636282327435390253)100:0.23604741392641107045,((Excavata-  
Trypanosoma\_cruzi\_71419198:0.00000121823947223981,Excavata-  
Trypanosoma\_cruzi\_71419196:0.00000121823947223981)99:0.00376643673536886364,(Excavata-  
Trypanosoma\_cruzi\_71654882:0.00237349975526313572,Excavata-  
Trypanosoma\_cruzi\_71654884:0.00000121823947223981)99:0.01295874995914064395)100:0.15479168350679023414)100:0.  
41903250491843274661,(((Plantae-Chlamydomonas\_reinhardtii\_196237:0.00579163391126812782,(Plantae-

Chlamydomonas\_reinhardtii\_196335:0.00000121823947223981,Plantae-  
Chlamydomonas\_reinhardtii\_118310:0.00000121823947223981)100:0.00847959984109306064)100:0.10923888151418438552,  
Plantae-Chlamydomonas\_reinhardtii\_196472:0.11036251939750843509)97:0.08119522059336510555,((Plantae-  
Chlamydomonas\_reinhardtii\_196438:0.02707563498922218453,Plantae-  
Chlamydomonas\_reinhardtii\_196439:0.03028211131362041481)85:0.06039777033791528249,(Plantae-  
Volvox\_carteri\_79831\_jgi:0.11507408312754370538,Plantae-  
Volvox\_carteri\_79832\_jgi:0.14770333684875258662)48:0.03678787614793641719)41:0.03881046411513481426)100:0.29814  
376331331104986,((Plantae-Chlamydomonas\_reinhardtii\_196464:0.01056791109007469698,Plantae-  
Chlamydomonas\_reinhardtii\_196465:0.02802743063694704273)100:0.63627984309288487808,(Plantae-  
Volvox\_carteri\_70155\_jgi:0.14211543186411215722,(Plantae-  
Chlamydomonas\_reinhardtii\_196333:0.19922656243680098020,((Plantae-  
Chlamydomonas\_reinhardtii\_181195:1.09865224733939470525,Plantae-  
Chlamydomonas\_reinhardtii\_196306:0.00000121823947223981)100:0.16732878911348625373,Plantae-  
Volvox\_carteri\_105976\_jgi:0.25120192509504984946)73:0.05352519952243587481)40:0.02257202065173777653)100:0.2340  
4101816924899326)36:0.04248176635107886456)83:0.13118438318227720885)94:0.13565761056683428576)84:0.137282244  
95426080698,((Opisthokonta-Magnaporthe\_grisea\_39973343:0.73215740289568886912,(Opisthokonta-  
Magnaporthe\_grisea\_39942536:0.45491278573361437765,((Opisthokonta-  
Cryptococcus\_neoformans\_58261344:0.26668776991531106813,Opisthokonta-Sporobolomyces\_roseus\_9234-  
e\_gw1.1.322.1:0.23930181814111037286)100:0.15342403150863531680,Opisthokonta-  
Ustilago\_maydis\_71018783:0.27152518446029011434)100:0.11585720816704657421)100:0.18846704267892838702)100:0.36  
760675340882054130,(Chromalveolata-Thalassiosira\_pseudonana\_261260:0.40445076918355743478,(Chromalveolata-  
Phaeodactylum\_tricornutum\_23830:0.34777871216856948156,Chromalveolata-  
Thalassiosira\_pseudonana\_36201:0.30188525660132259354)99:0.16008704420924407819)100:0.23661667518953566347)50:0  
.06728169309843008705)69:0.10214932486882279117,((Excavata-Naegleria\_gruberi\_55679-  
estExt\_fgeneshHS\_pm.C\_100012:0.68432863786440090159,Excavata-  
Euglena\_gracilis\_109789009\_2:1.05735900851638420228)59:0.19627915246877422617,(((Opisthokonta-  
Danio\_riero\_117606240:0.26970864140102068784,Opisthokonta-  
Mus\_musculus\_30794520:0.07246239697156639514)100:0.07806981766494031083,(Opisthokonta-  
Mus\_musculus\_7657579:0.11060589231202253013,((Opisthokonta-  
Danio\_riero\_125824283:1.12893786056507217097,Opisthokonta-  
Danio\_riero\_47085961:0.00000121823947223981)100:0.11444860457541548848,Opisthokonta-  
Danio\_riero\_47086851:0.06187847153520493332)100:0.08569496031869963670)98:0.08944352152720365379)99:0.18088134  
634082969621,(Opisthokonta-Apis\_mellifera\_48099304:0.34134633877720155226,Opisthokonta-  
Drosophila\_melanogaster\_21356511:0.25224836925843358015)100:0.16161574406071027576)100:0.44400488956186201506)  
23:0.07268294488306221990)91:0.27375252029751390159,(((Bacteria-  
Thermosiphon\_melanesiensis\_150021785:0.35112082650405790352,Bacteria-  
Fervidobacterium\_nodosum\_154249188:0.35235472801534184484)91:0.11766422692719895327,Bacteria-  
Thermotoga\_lettingae\_157363424:0.33147296817986282580)100:0.30047752864925553196,Bacteria-  
Desulfovibrio\_desulfuricans\_78358819:0.58745446135575574154)97:0.15618008927241050499,((Cyanobacteria-  
Nostoc\_punctiforme\_PCC\_73102\_23126971:0.10296285896204283861,((Cyanobacteria-  
Anabaena\_variabilis\_ATCC\_29413\_75906380:0.03090961553941280748,Cyanobacteria-  
Nostoc\_sp\_PCC\_7120\_17229828:0.03129127425385798411)80:0.09232206315101339211,Cyanobacteria-  
Nodularia\_spumigena\_CCY9414\_119512007:0.12504530433202049045)36:0.05428701267584411239)100:0.80026601851458  
267767,(Plantae-Galdieria\_sulphuraria\_Contig393\_6:0.62482623048762164775,Plantae-  
Cyanidioschyzon\_merolae\_CMS220C:0.55018947889662239703)100:0.32725120773780319583)37:0.11294437914101676523  
)28:0.09128527818386514281)12:0.06648225595843496039)85:0.14640095422599538888)95:0.20720441389036234336,(Bact  
eria-Magnetococcus\_sp\_117923545:0.22393267153065948838,Bacteria-  
Desulfotalea\_psychrophila\_51246480:0.22018728501463544212)100:0.11616504924808331023)48:0.06815165486594006172,  
Bacteria-  
Candidatus\_Ruthia\_118602176:0.36345461048452304409)16:0.00876291086874031108)2:0.05044704062789685112)6:0.0318  
1890752937226174,(Bacteria-Coxiella\_burnetii\_154706571:0.39191956091884888602,(Bacteria-  
Alkalilimnicola\_ehrlichei\_114321973:0.16993228587596015400,Bacteria-  
Halorhodospira\_halophila\_121997844:0.31931333946639495203)100:0.24517110894729476911)17:0.06597633057829511982  
)39:0.07078568154103791199,(Bacteria-Chromohalobacter\_salaxigens\_92112844:0.25442751862868651092,Bacteria-  
Oceanospirillum\_sp\_89095476:0.15434186310550404575)74:0.09167334484188985333)25:0.02504507050171548774)28:0.04  
816218954134945246,Bacteria-marine\_gamma\_119505430:0.31561033904905316794,Bacteria-  
Alcanivorax\_borkumensis\_110835166:0.23496996228811378726);

Plantae-Arabidopsis\_thaliana\_30691669

((Chromalveolata-Thalassiosira\_pseudonana\_39062:1.00629010661898865564,Chromalveolata-  
Phaeodactylum\_tricornutum\_49741:0.41842327761947395448)99:0.48954070611875522001,((Bacteria-  
Francisella\_tularensis\_118497361:1.17555152972337517703,(((Bacteria-

Symbiobacterium\_thermophilum\_51892235:0.72960850802181842489,(Bacteria-  
Salinibacter\_ruber\_83816316:0.89426194977730577573,((Cyanobacteria-Synechococcus\_sp.\_JA-2-3Ba2-  
13\_86610253:0.04223618328943880978,Cyanobacteria-Synechococcus\_sp.\_JA-3-  
3Ab\_86605012:0.07162533065358779594)100:0.24414769362709648481,Cyanobacteria-  
Gloeobacter\_violaceus\_PCC\_7421\_37523750:0.37741983839279347190)98:0.31996094582042389209,(Bacteria-  
Acidobacteria\_bacterium\_94968032:0.55572687834136180740,(Bacteria-  
Acidothermus\_cellulolyticus\_117927294:0.42552197700432364824,Bacteria-  
Kineococcus\_radiotolerans\_152964880:0.44996977605165727754)96:0.24061360211682270016)33:0.10137755836007822374)  
100:0.54893669051642424161)20:0.11053776145768633155)12:0.14981302032309104511,((Bacteria-  
Propionibacterium\_acnes\_50842892:1.14484327888339731949,((Bacteria-  
Thermosinus\_carboxydvorans\_121534244:0.57702270705083547053,((Bacteria-  
Streptococcus\_pyogenes\_15674507:0.36930691381141489416,Bacteria-  
Lactococcus\_lactis\_15672589:0.43654638381137789160)98:0.23299417362100510731,(((Bacteria-  
Bacillus\_anthraxis\_47530101:0.35359244477590090483,Bacteria-  
Geobacillus\_thermodenitrificans\_138896271:0.32941066590981155082)80:0.13557949521894671618,(Bacteria-  
Staphylococcus\_saprophyticus\_73662967:0.64712631082215699152,Bacteria-  
Listeria\_monocytogenes\_153174298:0.47406936365309587655)18:0.06408995543297524300)30:0.08212365173903397875,((  
Bacteria-Pediococcus\_pentosaceus\_116492486:0.66382818035260604539,(Bacteria-  
Leuconostoc\_mesenteroides\_116618817:0.22701875499365606337,Bacteria-  
Oenococcus\_oeni\_116490953:0.32396495223503091188)98:0.25948574721249251240)43:0.06842821843300329887,Bacteria-  
Lactobacillus\_sakei\_81428990:0.44903872106397946240)37:0.10652512694222419920)36:0.15454571708468906044,(Bacteri  
a-Aster\_yellows\_85057856:0.93260659426281200535,Bacteria-  
Mycoplasma\_mycoides\_42561043:0.55150174913450267233)89:0.34872674281900534199)37:0.04592830668525778315)94:0  
.33109881591162881875,(Bacteria-Thermoanaerobacter\_ethanolicus\_114844162:0.67361161979914863096,((Bacteria-  
Halothermothrix\_oreni\_89211290:0.84178350052728700970,Bacteria-  
Alkaliphilus\_metalliredigens\_150389425:0.52848360096795432561)25:0.18839453290047747380,Bacteria-  
Clostridium\_thermocellum\_125973737:0.41706649386745736630)12:0.05860925317509126792)13:0.08138979131394716293)  
4:0.02244234980425836509)4:0.07686276988165489932,(Bacteria-  
Desulfotobacterium\_hafniense\_109647669:0.70935206303894360325,(Bacteria-  
Pelotomaculum\_thermopropionicum\_147678286:0.52937054544058304018,Bacteria-  
Desulfotomaculum\_reducens\_134299475:0.41512878205055236958)84:0.14662344677880079225)22:0.1390808694075097995  
4)1:0.10557101268897527147,(Chlamydia-Candidatus\_Protoclamydia\_46447426:0.92156331319143691694,(((Bacteria-  
Sphingomonas\_sp.\_94495543:0.18217964218994481262,(Bacteria-  
Novosphingobium\_aromaticivorans\_87200913:0.15662890590418379611,Bacteria-  
Erythrobacter\_litoralis\_85373248:0.07384122506423942967)100:0.22978541718055103815)100:0.44604897880129246168,(Ba  
cteria-Stappia\_aggregata\_118589655:0.32931118923083141370,(Bacteria-  
Mesorhizobium\_sp.\_110636002:0.12629663791298056941,(Bacteria-  
Ochrobactrum\_anthropi\_153007507:0.17485140805562840449,Bacteria-  
Sinorhizobium\_medicae\_150395253:0.22847506348804819121)85:0.09549287582971827115)72:0.10926316638464639297)10  
0:0.25315084353899774960)93:0.18466976986122193849,Bacteria-  
Chloroflexus\_aggregans\_118047421:0.42198382666346351266)98:0.29788893535797283940)31:0.10595086761432440103)3:  
0.01095278045943741396)2:0.09732996278831225478,(((Bacteria-  
Carboxydotherrnus\_hydrogeniformans\_78042655:0.72028239122530113292,Bacteria-  
Solibacter\_usitatus\_116624472:0.80869627823101664088)17:0.12767930923015197164,Bacteria-  
Bacteroides\_capillosus\_154500974:0.73676011678354114132)9:0.14192493273122722131,((Chromalveolata-  
Phaeodactylum\_tricornutum\_49451:1.14967336750889836949,(((Bacteria-  
Clavibacter\_michiganensis\_148272114:0.40240265561523097526,(Bacteria-  
Ruminococcus\_obeum\_153810011:0.17477175999785565796,Bacteria-  
Dorea\_longicatena\_153855701:0.25747499283874347720)100:0.46630412019465800055)100:0.32275216370466430771,(Bact  
eria-Mycobacterium\_vanbaalenii\_120405985:0.46691806516974215802,Bacteria-  
Saccharopolyspora\_erythraea\_134097236:0.15066509400041186439)98:0.25384226147245153582)85:0.209025040515264881  
60,Bacteria-  
Caulobacter\_sp.\_113932427:0.76678943172657476612)78:0.26970454412538463762)100:0.53440015619337144503,((Chrom  
alveolata-Karenia\_brevis\_Kb\_CAGO\_R\_113A2\_5:1.05093196904105523615,Chromalveolata-  
Karenia\_brevis\_Contig3917\_5:1.19692268496635101371)92:0.32244442152635216514,((Plantae-  
Chlamydomonas\_reinhardtii\_108655:0.38703630202269662108,Plantae-  
Volvox\_carteri\_99057\_jgi:0.22738406357961757354)100:0.34779958741244931808,(Plantae-  
Arabidopsis\_thaliana\_30691669:0.29573182301575756670,Plantae-  
Oryza\_sativa\_115454647:0.41250981659806373880)100:0.37033113788287053136)55:0.11041002788898843234,(Plantae-  
Ostreococcus\_tauri\_34264:0.30779389684984098663,Plantae-  
Ostreococcus\_lucimarinus\_87970:0.18495135486275460224)100:0.57595711166689678162)91:0.15925519714087962853)60:0  
.11780070882323498416,Chlamydia-



Candidatus\_Protoclamydia\_46445775:0.57494225216356176222)96:0.31280392100797094201)29:0.05078220366216251030)  
5:0.10263535166475198923)0:0.04594825262515587344)3:0.10244389417896207495,(Bacteria-  
Moorella\_thermoacetica\_83590588:0.70320778075898771053,((Bacteria-  
Nitrosomonas\_europaea\_30248779:0.37288464954391359329,Bacteria-  
Nitrosospira\_multiformis\_82702991:0.42125200677919505399)99:0.27458646247920293071,Bacteria-  
Azoarcus\_sp\_119898184:0.35612484356745172098)99:0.49888039469057116060,((Cyanobacteria-  
Thermosynechococcus\_elongatus\_BP-1\_22299511:0.43633732215937720555,((Cyanobacteria-  
Synechococcus\_elongatus\_PCC\_6301\_56750360:0.00000121823947223981,Cyanobacteria-  
Synechococcus\_elongatus\_PCC\_7942\_81300008:0.00000121823947223981)100:0.29646373318512297956,((Cyanobacteria-  
Gloeobacter\_violaceus\_PCC\_7421\_37520123:0.63664193544652336598,Cyanobacteria-Synechococcus\_sp\_JA-3-  
3Ab\_86605783:0.3830443539422545071)83:0.14612846097921897148,((Cyanobacteria-  
Cyanothece\_sp\_CCY0110\_126656411:0.09667707751094833935,Cyanobacteria-  
Crocosphaera\_watsonii\_WH\_8501\_67925525:0.12891681451025902017)100:0.30657104562070797149,(Cyanobacteria-  
Lyngbya\_sp\_PCC\_8106\_119493555:0.22388376313547622698,(Cyanobacteria-  
Trichodesmium\_erythraeum\_IMS101\_113476712:0.38799497190661957902,(Cyanobacteria-  
Nodularia\_spumigena\_CCY9414\_119513673:0.08918929201710205923,(Cyanobacteria-  
Nostoc\_punctiforme\_PCC\_73102\_23124776:0.09387945187762782029,(Cyanobacteria-  
Anabaena\_variabilis\_ATCC\_29413\_75907658:0.03443398066835195309,Cyanobacteria-  
Nostoc\_sp\_PCC\_7120\_17227671:0.01414980405669547317)98:0.10260591778166291976)48:0.01085040361032947945)99:0.  
20280357371779494935)65:0.04570921502689470617)59:0.06092482816396885964)81:0.10620141132024704667)27:0.04778  
290932111091405)72:0.12430369712964216278)75:0.08415066254420985881,Cyanobacteria-  
Synechocystis\_sp\_PCC\_6803\_16330947:0.42659666416943398115)92:0.12076188596887604820,((Cyanobacteria-  
Prochlorococcus\_marinus\_str\_MIT\_9211\_84517586:0.35188017615647504410,(Cyanobacteria-  
Prochlorococcus\_marinus\_str\_MIT\_9303\_124023679:0.01230165780105957861,Cyanobacteria-  
Prochlorococcus\_marinus\_str\_MIT\_9313\_33862607:0.01399508479101467355)100:0.18158394259549093253)50:0.05699753  
632774577639,((Cyanobacteria-Synechococcus\_sp\_BL107\_116072328:0.00999830485272037821,Cyanobacteria-  
Synechococcus\_sp\_CC9902\_78185098:0.02544555266516766376)100:0.17885650380226636447,Cyanobacteria-  
Synechococcus\_sp\_WH\_8102\_33866165:0.15848641243488834074)99:0.13204480732879306237)69:0.117747143339491849  
86,(Cyanobacteria-Prochlorococcus\_marinus\_str\_MIT\_9515\_123966693:0.11542609295354341881,Cyanobacteria-  
Prochlorococcus\_marinus\_str\_MIT\_9312\_78779779:0.12611672877298429896)100:0.57777596473583170411)100:0.4522181  
0706935205992)99:0.15838701958105746992)15:0.08904453592310360155)6:0.05312112441128374191)41:0.1863225905755  
2416626)74:0.18643928786078389770,Bacteria-  
Roseiflexus\_sp\_148655189:0.39138070609766395513)41:0.11761923555797794416,Bacteria-  
Herpetosiphon\_aurantiacus\_113938219:0.51808026243504312625);

#### Plantae-Arabidopsis\_thaliana\_30697049

(Bacteria-Rhodococcus\_sp\_111023207:0.26954128731445242684,((Bacteria-  
Actinomyces\_odontolyticus\_154507745:0.25544888619693628673,Bacteria-  
Corynebacterium\_glutamicum\_19553579:0.36378628746957447637)70:0.11334927681437731439,(Bacteria-  
Streptomyces\_avermitilis\_29829979:0.08698818084586261434,(Bacteria-  
Frankia\_alni\_111224976:0.15462580990860316787,(Bacteria-  
Thermobifida\_fusca\_72160496:0.08260304668793524985,Bacteria-  
Saccharopolyspora\_erythraea\_134100212:0.10046207544738200435)31:0.02230911303592901865)29:0.041402964206110136  
34)45:0.04743105732380006878)41:0.05097735526708448844,((Bacteria-  
Arthrobacter\_aurescens\_119962447:0.15438994842265998941,(Bacteria-  
Mycobacterium\_ulcerans\_118619609:0.12634069366214575880,Bacteria-  
Nocardioides\_sp\_119717800:0.05328539218544626338)63:0.02418785085502070387)89:0.06791509036615815675,Bacteria-  
Propionibacterium\_acnes\_50843200:0.18383086648748611647)99:0.08202765289635809143,((Bacteria-  
Coxiella\_burnetii\_153208837:0.21420834196092017332,(Bacteria-  
Legionella\_pneumophila\_148359893:0.26789489915545294796,Bacteria-  
Rickettsiella\_grylli\_94493367:0.30038661263181137828)68:0.07044873315215723075)62:0.07322134730577398165,Bacteria-  
Leptospira\_borgpetersenii\_116328112:0.29206224652800671926)81:0.09310128937015266226,((Plantae-  
Ostreococcus\_tauri\_34202:0.08371569765623629311,Plantae-  
Ostreococcus\_lucimarinus\_42336:0.02380223280568109431)100:0.17885704174424976731,(Plantae-  
Volvox\_carteri\_76573\_jgi:0.02389741212884383126,(Plantae-  
Chlamydomonas\_reinhardtii\_192083:0.00000121823947223981,Plantae-  
Chlamydomonas\_reinhardtii\_80866:0.00000121823947223981)100:0.02392483454571408749)100:0.23415969412304282748,(  
Plantae-Oryza\_sativa\_115477843:0.07238806404546845041,(Plantae-  
Arabidopsis\_thaliana\_42573724:0.00000121823947223981,(Plantae-  
Arabidopsis\_thaliana\_30697051:0.00000121823947223981,Plantae-  
Arabidopsis\_thaliana\_30697049:0.00000121823947223981)100:0.00000121823947223981)100:0.05368049613764808159)93:0.  
.06174140163066667991,(Plantae-Physcomitrella\_patens\_93518:0.05245094329542387274,(Plantae-

Physcomitrella\_patens\_77520:0.01852637974181954930,Plantae-  
Physcomitrella\_patens\_74635:0.01727973175478444631)63:0.01792837180631134258)93:0.09163382924177340683)91:0.083  
71034233787695567)45:0.03799231938093408645)95:0.34023293099146234564,(Chlamydia-  
Candidatus\_Protoclamydia\_46447406:0.27166977387573304492,((Chlamydia-  
Chlamydia\_muridarum\_15835270:0.03750331502686102270,(Chlamydia-  
Chlamydia\_trachomatis\_15605100:0.00000121823947223981,Chlamydia-  
Chlamydia\_trachomatis\_76789106:0.00306061955492072926)100:0.02986305494617023590)84:0.06432692111687671188,(((  
Chlamydia-Chlamydomonada\_pneumoniae\_15836559:0.00000121823947223981,Chlamydia-  
Chlamydomonada\_pneumoniae\_33242398:0.00000121823947223981)12:0.00000121823947223981,(Chlamydia-  
Chlamydomonada\_pneumoniae\_15618936:0.00000121823947223981,Chlamydia-  
Chlamydomonada\_pneumoniae\_16751997:0.00000121823947223981)13:0.00000121823947223981)100:0.0978909711479981209  
4,(Chlamydia-Chlamydomonada\_abortus\_62185314:0.00625008682481718349,(Chlamydia-  
Chlamydomonada\_felis\_89898089:0.03545572177015206272,Chlamydia-  
Chlamydomonada\_caviae\_29840491:0.04064646350735189040)82:0.02614301933731567537)96:0.09303229338134870463)79:0.  
04708092152764903338)100:0.50726454940785059566)79:0.09214751199325797726)75:0.13749756593737028076,Bacteria-  
Magnetococcus\_sp.\_117924121:0.41179452038678188153)18:0.05834596972230360334)44:0.18981163501835893181,(Amoe  
bozoa-Hartmannella\_vermiformis\_Contig900\_1:0.24748289225722838736,((((Excavata-  
Trichomonas\_vaginalis\_123431031:0.19379546675936573652,Excavata-  
Trichomonas\_vaginalis\_123448526:0.16045600908079180047)95:0.15454057933729312135,((Excavata-  
Trichomonas\_vaginalis\_123398810:0.12346305374301029534,(Excavata-  
Trichomonas\_vaginalis\_123428711:0.09906014569959374627,(Excavata-  
Trichomonas\_vaginalis\_123438067:0.01716010899157103392,(Excavata-  
Trichomonas\_vaginalis\_123404233:0.02079985956716734127,Excavata-  
Trichomonas\_vaginalis\_123407394:0.01747251675807407617)55:0.00998749880268716590)78:0.02283936416833731373,((E  
xcavata-Trichomonas\_vaginalis\_123431390:0.00619368243221045216,Excavata-  
Trichomonas\_vaginalis\_123431388:0.00000121823947223981)100:0.05406331170128867575,Excavata-  
Trichomonas\_vaginalis\_123369283:0.02391036228386695522)53:0.01220305032106345708)74:0.05368348803823506932)50:  
0.04781040006588388458)100:0.41343095757940917512,((Cyanobacteria-  
Nodularia\_spumigena\_CCY9414\_119509419:0.00000121823947223981,Cyanobacteria-  
Nostoc\_punctiforme\_PCC\_73102\_23126205:0.17838469602391748836)100:1.39400681882674581935,Cyanobacteria-  
Nostoc\_punctiforme\_PCC\_73102\_23125612:1.58208945300840886361)97:1.09533192124691636238)35:0.1925414831970948  
2595)33:0.12120205078698076395,(Excavata-Giardia\_lambliia\_157435221:0.00000121823947223981,Excavata-  
Giardia\_lambliia\_159113785:0.00000121823947223981)100:0.70411913678266402350)21:0.11689789213782735000,(((Excava  
ta-Malawimonas\_jakobiformis\_Contig704\_3:0.36284037428165699657,((Chromalveolata-  
Tetrahymena\_thermophila\_118383251:0.35166757921741076398,(Chromalveolata-  
Paramecium\_tetraurelia\_124401717:0.00000121823947223981,(Chromalveolata-  
Paramecium\_tetraurelia\_124424507:0.01755403557491340763,Chromalveolata-  
Paramecium\_tetraurelia\_124396669:0.15223064171649175469)99:0.03652499558932743168)99:0.29237176318723784307)97:  
0.23119241777750057509,(Amoebozoa-Entamoeba\_histolytica\_67482981:0.63743002339351795271,(((Amoebozoa-  
Entamoeba\_histolytica\_67469755:0.00000121823947223981,Amoebozoa-  
Entamoeba\_histolytica\_67464753:0.00000121823947223981)32:0.00000121823947223981,Amoebozoa-  
Entamoeba\_histolytica\_67469777:0.00000121823947223981)100:0.02618335940898701419,Amoebozoa-  
Entamoeba\_histolytica\_67480659:0.00640222680434992392)100:0.35768835978575275192)89:0.28809761491861851646,Exc  
avata-  
Euglena\_gracilis\_Contig1722\_3:0.56061634404105142870)8:0.08228770431176357647)3:0.04516457636698956168)2:0.0510  
4614835839981629,(((Plantae-Physcomitrella\_patens\_195276:0.09621671102359186101,((Plantae-  
Oryza\_sativa\_115482534:0.05457330648623415909,Plantae-  
Arabidopsis\_thaliana\_15219721:0.03850920669607321017,Plantae-  
Arabidopsis\_thaliana\_15239843:0.01818368590165811427)88:0.02803088077906777317)57:0.03242205062692736506,(Planta  
e-Oryza\_sativa\_115459790:0.23844968723958515078,Plantae-  
Arabidopsis\_thaliana\_15241923:0.21869015212185366481)55:0.06151346972203061703)44:0.02718273609648394831)92:0.0  
7315074261231063746,((Plantae-Ostreococcus\_lucimarinus\_87414:0.09071924378962076263,Plantae-  
Ostreococcus\_tauri\_4610:0.16354171582919674321)100:0.32351492031847206565,(Plantae-  
Volvox\_carteri\_109769\_jgi:0.05338958280728389044,(Plantae-  
Chlamydomonas\_reinhardtii\_118222:0.00000121823947223981,Plantae-  
Chlamydomonas\_reinhardtii\_158129:0.00000121823947223981)100:0.08230808728982398625)100:0.15293705469109447614  
)74:0.08103652322363837091)73:0.17880517520670721754,(Excavata-  
Jakoba\_libera\_Contig382\_3:0.34366381462701572902,((((Chromalveolata-  
Paramecium\_tetraurelia\_124398937:0.50921475974365415507,((Chromalveolata-  
Paramecium\_tetraurelia\_124414336:0.01084029211729969737,Chromalveolata-  
Paramecium\_tetraurelia\_124409410:0.02559586469974904632)100:0.57500629595618080181,Chromalveolata-  
Tetrahymena\_thermophila\_118363871:0.36956781303371644132)96:0.18240615135015963988,Chromalveolata-

Tetrahymena\_thermophila\_118362698:0.25523245898129770515)55:0.03405057671148571663)95:0.22430881413763420484,(Chromalveolata-Thalassiosira\_pseudonana\_41425:0.72753578535516016945,Chromalveolata-Phytophthora\_sojae\_109232:0.38406531035187246870)19:0.10171491769813516270)4:0.04229649888394183127,((Chromalveolata-Isochrysis\_galbana\_Contig990\_2:0.31556843115165134073,(Plantae-Porphyr\_a\_zezoensis\_Contig147\_1:0.43055914084834040478,(Plantae-Galdieria\_sulphuraria\_HET\_42B11\_3:0.28944195385918730645,Plantae-Cyanidioschyzon\_merolae\_CMT611C:0.44070208277646027994)60:0.08172849776951193745)53:0.08481015993475798931)38:0.08515408969275950479,((Excavata-Trypanosoma\_brucei\_74025248:0.09284419636753474259,(Excavata-Trypanosoma\_cruzi\_71405868:0.00000121823947223981,Excavata-Trypanosoma\_cruzi\_71411668:0.02488075723718237431)100:0.32028156789206857491)100:0.40456226327346750393,(Chromalveolata-Pavlova\_lutheri\_Contig469\_1:0.00000121823947223981,Chromalveolata-Pavlova\_lutheri\_PLE00001528\_1:0.05644149911742422920)99:0.49167722072689312718)13:0.07228704506481985204)11:0.05411682544322539423)9:0.04330726549580108525,(Opisthokonta-Danio\_riero\_115529401:0.70565387056882356021,Opisthokonta-Mus\_musculus\_40254153:0.73115467814221557497)100:1.14303509301995509517)7:0.02847432099701051322)5:0.02866703084225760353)2:0.02972427036447304605,(((Opisthokonta-Apis\_mellifera\_66506786:0.20430035332103507750,Opisthokonta-Drosophila\_melanogaster\_24583394:0.15668618743736287269)95:0.14715975530831956752,(Opisthokonta-Mus\_musculus\_31982178:0.12575298388038988473,(Opisthokonta-Danio\_riero\_41053939:0.14814398944337323072,Opisthokonta-Danio\_riero\_41053921:0.07689564473581039783)88:0.05696963655041471786)99:0.11330321651543807937)85:0.11042026241539694420,(Amoebozoa-Acanthamoeba\_castellanii\_Contig362\_3:0.25464769542577891936,((Excavata-Malawimonas\_californiana\_Contig208\_1:0.30031977360067968474,(Excavata-Malawimonas\_jakobiformis\_Contig1102\_1:0.02208512472057182208,Excavata-Malawimonas\_jakobiformis\_Contig1448\_3:0.02711477183341675160)93:0.09650344953468760478)100:0.17893612053856142174,Amoebozoa-Hartmannella\_vermiformis\_Contig1413\_1:0.34410128648636362225)44:0.07154876291570842761)6:0.05319638706703931630)4:0.04322837445047359589,(Amoebozoa-Acanthamoeba\_castellanii\_Contig1063\_2:0.38974981495958138655,Excavata-Naegleria\_gruberi\_83065-estExt\_fgeneshNG\_pm.C\_150011:0.22098085850115176121)18:0.08494081708590495161)2:0.02571346534068047820)0:0.01682876690993876517)9:0.08250765855195150988,Rhizaria-Reticulomyxa\_filosa\_EE664964\_4:0.39205538608763762509)24:0.02833184885802074449)32:0.06896774592858997965,((((Bacteria-Azoarcus\_sp\_56479267:0.23394563608189120063,Bacteria-Chromobacterium\_violaceum\_34496517:0.05990630092970310183)54:0.04351658772400360947,((Bacteria-Xylella\_fastidios\_a\_28198404:0.11793064999717803309,(Bacteria-Stenotrophomonas\_maltophilia\_119879233:0.03066290941044075985,Bacteria-Xanthomonas\_oryzae\_58580594:0.03130235874121916478)86:0.02870645108990083766)99:0.05972773571267514514,Opisthokonta-Apis\_mellifera\_66557775:0.24481805019869365414)72:0.05673682770299486033)21:0.02425558188627079462,((Bacteria-Bordetella\_bronchiseptica\_33602659:0.13289622584366009295,(Bacteria-Polynucleobacter\_sp\_145588941:0.08503265184589015035,((Bacteria-Ralstonia\_pickettii\_153887608:0.06178763330143214466,((Bacteria-Methylibium\_petroleiphilum\_124267359:0.04808948897925909016,(Bacteria-Rhodoferrax\_ferrireducens\_89900592:0.07606233256845935931,(Bacteria-Verminephrobacter\_eiseniae\_121611270:0.10703811536095265977,Bacteria-Polaromonas\_sp\_91789449:0.00000121823947223981)78:0.02073327670359154801)92:0.04577418381086270638)76:0.02448817545348611763,(Bacteria-Acidovorax\_avenae\_120610880:0.01488262007756183287,(Bacteria-Comamonas\_testosteroni\_118050993:0.01817755268714634637,Bacteria-Delftia\_acidovorans\_118732119:0.02985764423744473317)100:0.04318629385224369288)92:0.03599210850494088954)89:0.04554672253173984442)68:0.03774381030375807689,(Bacteria-Janthinobacterium\_sp\_152980043:0.02277702411949962535,Bacteria-Hermineimonas\_arsenicoydans\_134094986:0.01785586538373707538)100:0.05585650618884058921)46:0.03702867156032590978)38:0.02391106150755131776)75:0.05047978143699610731,(Bacteria-Limnobacter\_sp\_149926167:0.13492969488524389488,(Bacteria-Xanthobacter\_autotrophicus\_154245617:0.25101531874272953182,Bacteria-Burkholderia\_phytofirmans\_118036548:0.05946607423187577623)75:0.03789001502477941374)56:0.03901143441846210286)14:0.01977047423262588699)83:0.11592436901928457327,(Bacteria-Nitrosomonas\_eutropha\_114331619:0.30861781517571451605,Bacteria-Nitrosospira\_multiformis\_82701993:0.21850077605399567671)96:0.08566749192601270935)73:0.06778837819903107964,((Bacteria-Thermus\_thermophilus\_46198476:0.23274461666819196148,Bacteria-Deinococcus\_geothermalis\_94986260:0.15538473633711746835)49:0.03893087659052595073,((Bacteria-Halorhodospira\_halophila\_121997621:0.17605549478029661192,Bacteria-

Alkalilimnicola\_ehrlichei\_114319648:0.11757957454493699057)61:0.04376378977039738216,(((Bacteria-  
Psychrobacter\_cryohalolentis\_93006868:0.15087782677896285910,((Bacteria-  
Saccharophagus\_degradans\_90021304:0.13235495361225610433,Bacteria-  
Alcanivorax\_borkumensis\_110834109:0.08932689870349048988)49:0.04189048297601399157,Bacteria-  
marine\_gamma\_119503152:0.17483582448013940125)42:0.03235072724081115847)27:0.02153802883062925014,Bacteria-  
Desulfotalea\_psychrophila\_51244513:0.45938889223328255307)40:0.03163511239855926888,(Bacteria-  
Methylococcus\_capsulatus\_53805062:0.37560771990999142211,Bacteria-  
Oceanospirillum\_sp\_89095300:0.38497579302629170162)64:0.12172269783972868018)14:0.01064429453258698872)18:0.04  
279006539520975594,((Plantae-Cyanophora\_paradoxa\_Contig541\_5:0.28181934175689721256,Amoebozoa-  
Acanthamoeba\_castellanii\_Contig914\_2:0.54118679680931314202)74:0.25050027560234172652,(((Plantae-  
Galdieria\_sulphuraria\_A4\_12H05\_3:0.43929480368533918577,((((((Plantae-  
Chondrus\_crispus\_Contig256\_2:0.11073348167324396918,Plantae-  
Gracilaria\_changii\_Contig518\_4:0.06505255024790258800)89:0.07973426711216621832,Plantae-  
Porphyra\_zezoensis\_Contig542\_2:0.16784592977344281461)81:0.07201615315462844835,Plantae-  
Porphyra\_zezoensis\_Contig321\_2:0.27120079142919867321)78:0.11506472895004221657,Plantae-  
Cyanidioschyzon\_merolae\_CMP193C:0.24466063070663934820)43:0.06552628833231206873,Plantae-  
Chondrus\_crispus\_Contig317\_1:0.20197716076951738318)57:0.07363154559007042965,Plantae-  
Porphyra\_zezoensis\_AV437295\_1:0.18262228660740847941)73:0.02970170960968150295,Amoebozoa-  
Acanthamoeba\_castellanii\_Contig971\_1:0.31944105641882641899)32:0.05711049993401617897)20:0.0807814008692773755  
1,((Excavata-Naegleria\_gruberi\_31160-e\_gw1.8.144.1:0.39644554501800094437,Excavata-Naegleria\_gruberi\_60960-  
fgeneshNG\_pm.scaffold\_70000001:0.32324442318880580727)34:0.09578253399203888463,((Excavata-  
Malawimonas\_jakobiformis\_Contig1332\_2:0.15976360689203317200,(Plantae-  
Porphyra\_zezoensis\_AU195687\_1:4.74988470624374325979,Excavata-  
Malawimonas\_californiana\_110030533\_3:0.00000121823947223981)11:0.19163597654016670258)11:0.233861199858103885  
33,((Excavata-Jakoba\_bahamiensis\_Contig14\_3:0.48791236740582105691,Excavata-  
Jakoba\_libera\_Contig518\_3:0.14894355423548766293)98:0.17788094723446298828,(Rhizaria-  
Reticulomyxa\_filosa\_EE664753\_5:0.43265464443357326552,(Chromalveolata-  
Tetrahyena\_thermophila\_118346673:0.21941125838520544877,((Chromalveolata-  
Paramecium\_tetraurelia\_124392513:0.00124694160901298165,Chromalveolata-  
Paramecium\_tetraurelia\_124418922:0.11244336755927747395)100:0.07766635915396410961,Chromalveolata-  
Paramecium\_tetraurelia\_124391972:0.00000121823947223981)100:0.29655324505450408878)88:0.08047974688641859609)3  
6:0.06600749286404428151)17:0.01193047364202728944)8:0.06098733573312454387)2:0.03806558218075224709)0:0.01515  
040496022437670,Plantae-  
Glaucocestis\_nostochinearum\_Contig579\_1:0.28677389271936154502)0:0.00000121823947223981)2:0.084852535159247233  
22)2:0.03556081228016452073)3:0.03016024548699093935)5:0.05410211346224129414)10:0.02850097009689400718)13:0.0  
6860734962660189340)94:0.08205684258815251764)89:0.07481591386523032960)38:0.0538999866658464554,Bacteria-  
Rubrobacter\_xylanophilus\_108804129:0.36110948988743912791);

Plantae-Arabidopsis\_thaliana\_42563306

(((Bacteria-Cytophaga\_hutchinsonii\_110638646:0.74571960964810812822,((((Bacteria-  
Lactobacillus\_casei\_116495592:0.07402353056880323079,Bacteria-  
Pediococcus\_pentosaceus\_116493438:0.12065510695494599536)90:0.12948012210924284004,(Bacteria-  
Oenococcus\_oeni\_116490407:0.66252156819998497816,Bacteria-  
Leuconostoc\_mesenteroides\_116618953:0.2220867352220540031)19:0.04570576842392530537)25:0.0902822698940178580  
7,Bacteria-Streptococcus\_mutans\_24379074:0.31029182040683489507)20:0.04797302138512623410,(Bacteria-  
Neisseria\_meningitidis\_15794692:0.27178315476500558567,Bacteria-  
Listeria\_monocytogenes\_153175470:0.16204601393115411478)48:0.07710287344794797271)12:0.06329695363907199279,(B  
acteria-Staphylococcus\_haemolyticus\_70725637:0.47164335580526822733,((((Opisthokonta-  
Drosophila\_melanogaster\_85725270:0.00000121823947223981,Opisthokonta-  
Drosophila\_melanogaster\_24650981:0.00000121823947223981)34:0.00000121823947223981,Opisthokonta-  
Drosophila\_melanogaster\_85725272:0.00000121823947223981)100:0.07331388311924832979,Opisthokonta-  
Apis\_mellifera\_66550890:0.19227031365590077638)74:0.07854943313924009352,Opisthokonta-  
Drosophila\_melanogaster\_24646216:0.15107746601520438690)100:0.35612569534494264989,(((Bacteria-  
Nitrosomonas\_europaea\_30249740:0.22469369625381735434,Bacteria-  
Chlorobium\_phaeobacteroides\_119356462:0.20693486511044065224)33:0.05699803589839209927,Bacteria-  
Alcanivorax\_borkumensis\_110834630:0.23508665681556806248)36:0.03617671580864570413,(((Bacteria-  
Treponema\_denticola\_42527203:0.21889469300260300244,Bacteria-  
Clostridium\_phytofermentans\_106885052:0.21733351955170293612)92:0.16296070418647312650,(((Bacteria-  
Klebsiella\_pneumoniae\_152969325:0.01380082572983078529,(Bacteria-  
Yersinia\_pestis\_45440859:0.07378300892372072206,Bacteria-  
Enterobacter\_sp\_146310904:0.03167612414610425364)54:0.00918594450411409739)70:0.02597212996679712158,Bacteria-  
Salmonella\_enterica\_16759697:0.00000121823947223981)40:0.01506274521181573053,(Bacteria-

Shigella\_boydii\_82543175:0.00000121823947223981,Bacteria-  
Escherichia\_coli\_157155502:0.00506400687972225275)92:0.01024572777482796182,Bacteria-  
Citrobacter\_koseri\_157146620:0.01535598709502820208)42:0.00000121823947223981)100:0.16370278691089690248)29:0.1  
0461272658424262960,(((((((Chromalveolata-Phytophthora\_sojae\_108887:0.29901231971929292941,Chromalveolata-  
Phytophthora\_sojae\_108482:0.16917546226039725799)48:0.06163175296668376574,Rhizaria-  
Bigelowiella\_natans\_DR040394\_3:0.18680294620580134568)40:0.04090815395754641287,(Chromalveolata-  
Phaeodactylum\_tricornutum\_33839:0.15243436638631943647,Chromalveolata-  
Thalassiosira\_pseudonana\_27850:0.12513197606060411093)98:0.17451143904663457551)45:0.05209387583376126618,(Chro  
malveolata-Phaeodactylum\_tricornutum\_17086:0.16583447767658823779,Chromalveolata-  
Thalassiosira\_pseudonana\_28350:0.22480954830786445409)91:0.08797143643742859342)66:0.08181035892196494852,(Chro  
malveolata-Toxoplasma\_gondii\_92399533:0.16462430461118596203,Chromalveolata-  
Plasmodium\_falciparum\_124804024:0.15854730808881700721)99:0.15717211509974912675)20:0.05362996532873295225,(E  
xcavata-Naegleria\_gruberi\_35141-estExt\_gwp\_gwl.C\_40123:0.21621103566841573529,Amoebozoa-  
Acanthamoeba\_castellanii\_Contig316\_3:0.19635264154088372113)12:0.02909814804315494219)2:0.02528654104245429621,  
Bacteria-Borrelia\_garinii\_51598913:0.34506025623759012388)0:0.01291504702078752863,Bacteria-  
Thermoanaerobacter\_ethanolicus\_114844470:0.20153817780006649807)1:0.00000121823947223981)3:0.06427968241682466  
277)4:0.07778596788856152744,(Chromalveolata-Phytophthora\_sojae\_157951:1.78540968212313422292,Chromalveolata-  
Thalassiosira\_pseudonana\_17651:0.44698561477398301989)7:0.39387798260532480565,(((Bacteria-  
Actinomyces\_odontolyticus\_154508490:0.21474462423105333819,((Bacteria-  
Corynebacterium\_jekium\_68537006:0.24030671637437114874,Bacteria-  
Mycobacterium\_smeigmatis\_118471051:0.15327851590353414046)48:0.05786370277869509748,(Bacteria-  
Rhodococcus\_sp.\_111019063:0.14125109637896066106,(Bacteria-  
Saccharopolyspora\_erythraea\_134103393:0.05982311256265924332,(Bacteria-  
Streptomyces\_avermitilis\_29830522:0.16923089325030807317,Bacteria-  
Frankia\_sp.\_86739183:0.19300990418843563812)48:0.07664340274668084152)41:0.08044289520611168365)13:0.015664867  
91240480694)15:0.06850103477528070306)13:0.03085593132649268322,Bacteria-  
Propionibacterium\_acnes\_50841849:0.28287306596025607597)28:0.05219969174245660259,(Bacteria-  
Tropheryma\_whipplei\_28493622:0.48360749714692280454,Bacteria-  
Nitratiruptor\_sp.\_152990666:0.53458527751299567132)39:0.12621390420663353149)62:0.14725121088987058737)1:0.06153  
411752547125607)1:0.03446189467094527142)2:0.07342767023935359294)0:0.00846278692296353365)1:0.03175856525032  
464545,(Bacteria-Desulfovibrio\_vulgaris\_46581339:0.43168437574593104822,Chromalveolata-  
Aureococcus\_anophagefferens\_14005:0.50741907464567614916)35:0.15912443203380544077)8:0.13355191816114217462)15  
:0.11746851883671627359,(((Bacteria-Myxococcus\_xanthus\_108762943:0.47323809708562747378,(Bacteria-  
Parvibaculum\_lavamentivorans\_154254001:0.21484463673729109479,(((Opisthokonta-Sporobolomyces\_roseus\_12139-  
e\_gwl\_4.676.1:0.29050142663701988832,Opisthokonta-  
Ustilago\_maydis\_71022513:0.26740217678493349851)61:0.11252265804130802407,Opisthokonta-  
Schizosaccharomyces\_pombe\_19115801:0.27450837295849145336)36:0.09209407469706175353,(Bacteria-  
Stappia\_aggregata\_118590507:0.26320167941338923345,((Bacteria-  
Methylobacterium\_chloromethanicum\_156450008:0.28997458194965458622,(((Bacteria-  
Mesorhizobium\_sp.\_110635917:0.25557838548125250133,(Bacteria-  
Bartonella\_bacilliformis\_121602512:0.35325969564330644834,(Bacteria-  
Ochrobactrum\_anthropi\_153008660:0.02589239349261963224,Bacteria-  
Brucella\_ovis\_148558100:0.02733161056885962531)87:0.02760104985029088187)65:0.03954844264688067712)41:0.039352  
41653266863260,(Bacteria-Aurantimonas\_sp.\_90420658:0.13403200001173209976,Bacteria-  
Fulvimarina\_pelagi\_114705033:0.22286919365940630056)53:0.06214044732291201800)37:0.01708905318412380289,(Bacter  
ia-Rhizobium\_etli\_86355829:0.08908941365317381289,Bacteria-  
Sinorhizobium\_medicae\_150398561:0.05240695615582870864)100:0.16106251845336752582)71:0.07648396144773368655)6  
0:0.04922390972760716521,(Bacteria-Bradyrhizobium\_sp.\_146337326:0.07325609463822609080,(Bacteria-  
Nitrobacter\_hamburgensis\_92115791:0.13837999193150465893,Bacteria-  
Rhodopseudomonas\_palustris\_90421860:0.07293087622615671006)83:0.03887759929366417511)89:0.1203647612476904382  
7)66:0.10759221699271409589)68:0.04326826552342563637)28:0.07195141279318165162)100:0.24636356738226380947)40  
:0.08662246981042130700,Bacteria-  
Pseudoalteromonas\_atlantica\_109898907:0.71590876363133582050)32:0.03702740540476123776,(Cyanobacteria-  
Gloeobacter\_violaceus\_PCC\_7421\_37521444:0.68196367400537249992,(Cyanobacteria-  
Gloeobacter\_violaceus\_PCC\_7421\_37521165:0.26396085919252121332,Cyanobacteria-  
Cyanotheca\_sp.\_CCY0110\_126660142:0.22639067568288456789)100:0.37662202111764220280)7:0.05349551095937061379)  
15:0.08018311446021707256)85:0.31439225995094871591,((Chlamydia-  
Chlamydophila\_pneumoniae\_15836396:0.00511188029789079110,((Chlamydia-  
Chlamydophila\_pneumoniae\_33242223:0.00000121823947223981,Chlamydia-  
Chlamydophila\_pneumoniae\_15618772:0.00000121823947223981)37:0.00000121823947223981,Chlamydia-  
Chlamydophila\_pneumoniae\_16752176:0.00000121823947223981)61:0.00000121823947223981)100:0.1083363834795755265  
0,((Chlamydia-Chlamydophila\_felis\_89897917:0.02010236211879717905,(Chlamydia-

Chlamydomonada\_abortus\_62185474:0.05455294433710617535,Chlamydia-  
Chlamydomonada\_caviae\_29840659:0.06103568877801975046)27:0.01043603530089079814)98:0.10863685427751854085,(Chla-  
mydia-Chlamydia\_muridarum\_15834720:0.05188530228108870906,(Chlamydia-  
Chlamydia\_trachomatis\_15605455:0.00000121823947223981,Chlamydia-  
Chlamydia\_trachomatis\_76789462:0.00000121823947223981)100:0.05493554911927019807)86:0.10654289280523768224)23:  
0.01889775017620376474)97:0.40352109604939789822)46:0.02321846860401242940,Chlamydia-  
Candidatus\_Proteochlamydia\_46445795:0.28346984817713705151)99:0.25209026061770145599,(Plantae-  
Oryza\_sativa\_115448715:0.07214536406906355004,(Plantae-  
Arabidopsis\_thaliana\_42563306:0.10918049267574343741,Plantae-  
Arabidopsis\_thaliana\_18395083:0.01911942972398899057)73:0.03444524166706939422)64:0.03255425373127491390,Plantae  
-Physcomitrella\_patens\_130367:0.19787975861845366610);

Plantae-Arabidopsis\_thaliana\_42565237

(Chromalveolata-Phaeodactylum\_tricornutum\_47290:0.34152919394495162564,(Chromalveolata-  
Phaeodactylum\_tricornutum\_44055:0.95271387889918479619,(Chlamydia-  
Candidatus\_Proteochlamydia\_46447632:0.69359612361918365764,(Bacteria-  
Geobacter\_lovleyi\_118746507:0.65442028957446385373,(Bacteria-  
Lactococcus\_lactis\_125625220:0.96194363194432563891,Bacteria-  
Alkaliphilus\_metalliredigens\_150391752:0.40321798597096575323)39:0.14219237658763467236,Bacteria-  
Leptospira\_borgpetersenii\_116330374:1.07411587877184566686)79:0.34067002824936926109)100:1.10023884843271768652,  
(Plantae-Volvox\_carteri\_41894\_jgi:1.06945273665824647225,(Plantae-  
Arabidopsis\_thaliana\_42565237:0.26029680203216709611,Plantae-  
Oryza\_sativa\_115441879:0.18019732725013840047)100:0.19728885615446642432,Plantae-  
Physcomitrella\_patens\_12476:0.32833235083920692121)91:0.16807624259941653100)56:0.11696457071197216560,Plantae-  
Ostreococcus\_lucimarinus\_24318:1.13958298946834690746)43:0.06314004813302181995)51:0.11804192217291262224)89:0.  
27149475894526869935)100:0.46707084436994178445,Chromalveolata-  
Thalassiosira\_pseudonana\_22499:0.30945465669579114154);

Plantae-Arabidopsis\_thaliana\_42573275

(Plantae-Arabidopsis\_thaliana\_42571387:0.00000121823947223981,(Plantae-  
Arabidopsis\_thaliana\_30690721:0.09965413760414761069,Plantae-  
Arabidopsis\_thaliana\_30690718:0.04369681644756376326)94:0.12484573190855233205,(Plantae-  
Arabidopsis\_thaliana\_30681012:0.00490719908498091217,(Plantae-  
Arabidopsis\_thaliana\_15223003:0.00000121823947223981,Plantae-  
Arabidopsis\_thaliana\_30680348:0.00000121823947223981)93:0.00000121823947223981)98:0.00000121823947223981,(Planta  
e-Oryza\_sativa\_115445445:0.51327194493731742586,(Plantae-  
Chlamydomonada\_reinhardtii\_184947:0.09241428906044540925,Plantae-  
Volvox\_carteri\_57561\_jgi:0.06240046567344433720)100:0.40644742126317451314,(Plantae-  
Physcomitrella\_patens\_17202:0.26284567370357997396,(Bacteria-  
Coxiella\_burnetii\_95926268:0.84015897779089565578,(Chlamydia-  
Chlamydia\_trachomatis\_76789051:0.00990798765098578962,Chlamydia-  
Chlamydia\_trachomatis\_15605050:0.00000121823947223981)97:0.12348541359549242147,Chlamydia-  
Chlamydia\_muridarum\_15835220:0.13459947972603389377)100:0.67964406274546784736,(Chlamydia-  
Chlamydomonada\_caviae\_29840323:0.04963035427680887596,Chlamydia-  
Chlamydomonada\_felis\_89898244:0.03367252079861638575)100:0.41239433844530848372)100:0.47644168939807757246)100:  
0.28120461990085754422,(Plantae-Ostreococcus\_tauri\_19960:0.20384843195120580517,Plantae-  
Ostreococcus\_lucimarinus\_6627:0.18633783263658251772)100:0.43044873047130266519)73:0.05766759435403657347)76:0.  
09634993364842300845)100:0.32634506093523413250)99:0.18278387110720609177)100:0.12516149466726569917)100:0.05  
036588438322806005,Plantae-Arabidopsis\_thaliana\_42573275:0.00632030907275514357);

Plantae-Arabidopsis\_thaliana\_42573371

(Plantae-Physcomitrella\_patens\_130288:0.15561103289878525091,(Bacteria-  
Magnetococcus\_sp\_117925780:0.72294899061622519554,(Bacteria-  
Paracoccus\_denitrificans\_119385429:0.13358962430206333671,Bacteria-  
alpha\_proteobacterium\_114769823:0.35203273503811954859)65:0.06360088980344873189,(Bacteria-  
Roseobacter\_denitrificans\_110677715:0.28728360537468200508,Bacteria-  
Silicibacter\_sp\_99078433:0.12839904121879430754)42:0.05184309605630278706,(Bacteria-  
Oceanicola\_granulosus\_89070052:0.16920738531570397867,Bacteria-  
Sagittula\_stellata\_126732700:0.14279236034392236987)19:0.02659467887493660240)27:0.03766726863714606188,Bacteria-  
Roseovarius\_sp\_149201317:0.19427314875183437914)52:0.04408117866750572988)82:0.08780917002712713970,Bacteria-  
Jannaschia\_sp\_89052599:0.38288049538314655740)99:0.29617985468172203234)36:0.07276681439553572828,(Bacteria-  
Xanthobacter\_autotrophicus\_154248069:0.40188852117534140662,(Bacteria-

Solibacter\_usitatus\_116620283:0.24502620784983614177,Bacteria-  
Acidiphilium\_cryptum\_148259679:0.54860776204958439095)47:0.06549883401658887494)86:0.16488897912380851007,(((  
Bacteria-Maricaulis\_maris\_114569716:0.73628417412767166450,(Bacteria-  
Sphingomonas\_wittichii\_148553167:0.21755904348901536349,(Bacteria-  
Sphingopyxis\_alaskensis\_103486768:0.15573139637078958764,(Bacteria-  
Erythrobacter\_sp.\_149184573:0.28141502247966321271,Bacteria-  
Novosphingobium\_aromaticivorans\_87199937:0.25901174384979019916)52:0.02921218878776942265)87:0.10945753647715  
014689)96:0.22665998466865075467)18:0.02014642238327119667,Bacteria-  
Hyphomonas\_neptunium\_114797544:0.51618873669500819901)54:0.06117586377119555580,(Plantae-  
Ostreococcus\_tauri\_6912:0.25312615945879302082,Plantae-  
Ostreococcus\_lucimarinus\_8182:0.10198962811834798303)100:0.61811515362124347384)40:0.08263771616220511040,(((Ba  
cteria-Rhodopseudomonas\_palustris\_90421758:0.08578285394573988143,(Bacteria-  
Bradyrhizobium\_sp.\_146337509:0.06056366555825030973,Bacteria-  
Nitrobacter\_hamburgensis\_92119051:0.20565949345952211358)99:0.13822406838223075254)100:0.24804811603294221745,(  
Bacteria-Methylobacterium\_sp.\_149121730:0.22844552343318821896,Bacteria-  
Bordetella\_bronchiseptica\_33599395:0.38203848070759899302)63:0.07727950093467679527)96:0.13982680282603901500,(B  
acteria-Stappia\_aggregata\_118592049:0.51967659151000544782,(((Bacteria-  
Rhizobium\_etli\_86359681:0.12503314138722704252,Bacteria-  
Agrobacterium\_tumefaciens\_15889755:0.13830242006638993058)89:0.05600628761146698303,Bacteria-  
Sinorhizobium\_medicale\_150398377:0.09699786792820926096)85:0.09429047411982004190,(Bacteria-  
Mesorhizobium\_sp.\_110635552:0.12903495388011987366,Bacteria-  
Ochrobactrum\_anthropi\_153008408:0.16940278126827620908)43:0.03983106301703009944)58:0.06890045566201770388,(B  
acteria-Fulvamarina\_pelagi\_114705845:0.26258149571911831854,Bacteria-  
Aurantimonas\_sp.\_90421028:0.14988931042143696648)96:0.10547211515391546888)29:0.05564133368425496634,Bacteria-  
Bartonella\_bacilliformis\_121601926:0.26604161377660046073)98:0.15386715573614759278)23:0.04269141349292665533)95  
:0.17268650278488589800)34:0.09429048667801814831)25:0.08202146237771361370,(Bacteria-  
Parvibaculum\_lavamentivorans\_154253501:0.62537528982102907893,(((Excavata-  
Jakoba\_libera\_Contig148\_1:0.69173313460204477465,((Opisthokonta-  
Magnaporthe\_grisea\_39945258:0.79592664139997526540,(Chromalveolata-  
Paramecium\_tetraurelia\_124426827:0.0000121823947223981,((Chromalveolata-  
Paramecium\_tetraurelia\_124410881:0.01856064797712060968,Chromalveolata-  
Paramecium\_tetraurelia\_124429701:0.05150255628139407960)97:0.07874278861536984642,(Chromalveolata-  
Paramecium\_tetraurelia\_124390987:0.06051444386002048648,((Chromalveolata-  
Paramecium\_tetraurelia\_124390937:0.05314636713832138898,Chromalveolata-  
Paramecium\_tetraurelia\_124403883:0.07524460060895186986)89:0.03629634240203735707,Chromalveolata-  
Paramecium\_tetraurelia\_124401814:0.04391288823261182278)99:0.13308356440051838376)33:0.07928557756026465009)33:  
0.05813151185644862412)98:0.52637364337963565841)100:0.95330535911953884209,(Bacteria-  
Desulfotobacterium\_hafniense\_89894274:0.38113359230796867161,(Bacteria-  
Wolinella\_succinogenes\_34556729:0.31736644631650101633,Bacteria-  
Caminibacter\_mediatlanticus\_149194049:0.38248946269044659108)65:0.09779853114984186913)100:0.281503116629519822  
83,(((Plantae-Glaucocystis\_nostochinearum\_Contig1080\_1:0.47535244173766799669,Chlamydia-  
Candidatus\_Proteochlamydia\_46446564:0.45100684643274968622)100:0.37110737814028177395,(Bacteria-  
Pseudomonas\_aeruginosa\_116053823:0.50539382576422053894,((Cyanobacteria-  
Synechococcus\_elongatus\_PCC\_7942\_81300256:0.0000121823947223981,Cyanobacteria-  
Synechococcus\_elongatus\_PCC\_6301\_56750119:0.00414074717136988981)100:0.20854458474133161228,((Cyanobacteria-  
Synechocystis\_sp.\_PCC\_6803\_16330758:0.13252933925275467431,((Cyanobacteria-  
Cyanotheca\_sp.\_CCY0110\_126658594:0.03861451416032900957,Cyanobacteria-  
Cyanotheca\_sp.\_CCY0110\_126658699:0.10908040661381583625)71:0.02311368936881630365,Cyanobacteria-  
Crocosphaera\_watsonii\_WH\_8501\_67923261:0.02252090343181326060)79:0.03127317179410203651)85:0.081497091001712  
11029,Cyanobacteria-  
Nostoc\_punctiforme\_PCC\_73102\_23128982:0.15663386049404254274)36:0.04805181469264865196)92:0.1150139724486760  
6062,Cyanobacteria-  
Anabaena\_variabilis\_ATCC\_29413\_75908384:0.26493617470581670714)99:0.17167251851440090693)93:0.19616801372603  
667741)87:0.16881112878232498731,(Bacteria-Arcobacter\_butzleri\_157736514:0.26892396878205859778,Chlamydia-  
Candidatus\_Proteochlamydia\_46446692:0.61194639203927325699)49:0.11798060691366446529,(Bacteria-  
Nitratiruptor\_sp.\_152990078:0.29816910620197228932,Excavata-  
Malawimonas\_californiana\_Contig11\_2:0.67810052867647585551)29:0.06414974088208970360)96:0.22506607912811152361  
)53:0.05796334448572122017)62:0.08401589870684411654)74:0.17356517444585264909)43:0.12881922935593273505,(((Ba  
cteria-Desulfobrevibrio\_vulgaris\_46580187:0.31424608263727399349,(Bacteria-  
Bdellovibrio\_bacteriovorus\_42523716:0.67054972905898480029,(Bacteria-  
Ralstonia\_metallicurans\_94311016:0.39585284729476521992,Bacteria-  
Methylococcus\_capsulatus\_53804236:0.72932495539340425061)30:0.0437600099967930710)7:0.04810909804325881611,Ba

acteria-

Lawsonia\_intracellaris\_94986910:0.63074678471585976514)15:0.03530621922430558085)19:0.07913259769113771547,(Bacteria-Pelobacter\_carbinolicus\_77919584:0.33869941705857142811,Bacteria-Geobacter\_lovleyi\_118746697:0.29006382478554176840)23:0.0467329604333222127,Bacteria-Desulfuromonas\_acetoxidans\_95931147:0.30616218038335463181)5:0.02263713507839801645)23:0.03621031946247991323,Bacteria-marine\_gamma\_119475057:0.81361925721371242126)31:0.09766629363505491268)10:0.07262149275372910273,(Bacteria-Psychromonas\_sp.\_90408545:0.51133524465210811183,Bacteria-Coxiella\_burnetii\_154705747:0.72917211447256946588)25:0.09120379269785360010)4:0.07312705787014260606)3:0.00000121823947223981)8:0.12279874759534535611)100:0.38492601941148785194,(((Plantae-Arabidopsis\_thaliana\_30696223:0.00803752847037786204,Plantae-Arabidopsis\_thaliana\_79320225:0.00000121823947223981)66:0.00000121823947223981,Plantae-Arabidopsis\_thaliana\_30696219:0.01908711930629697004)100:0.48005246483644536948,(Plantae-Arabidopsis\_thaliana\_79326253:0.00401055872759721599,Plantae-Arabidopsis\_thaliana\_18418245:0.00000121823947223981)100:0.24660174743104343320,Plantae-Oryza\_sativa\_115479631:0.24868063507149881786)52:0.03133831760797286398)99:0.36904186798046506590,(Plantae-Oryza\_sativa\_115438793:0.40075373462797819757,(Plantae-Arabidopsis\_thaliana\_15220853:0.14621227638349557076,(Plantae-Arabidopsis\_thaliana\_15223141:0.00000121823947223981,(Plantae-Arabidopsis\_thaliana\_42572057:0.00000121823947223981,Plantae-Arabidopsis\_thaliana\_30698715:0.00000121823947223981)33:0.00000121823947223981)100:0.09161512858767549561)99:0.17753802904649695904,(((Plantae-Arabidopsis\_thaliana\_79327881:0.00000121823947223981,Plantae-Arabidopsis\_thaliana\_79327873:0.00835957168366795178)59:0.00000121823947223981,(Plantae-Arabidopsis\_thaliana\_42573371:0.00000121823947223981,Plantae-Arabidopsis\_thaliana\_30685030:0.00000121823947223981)67:0.00000121823947223981)99:0.03320697211177443126,(Plantae-Arabidopsis\_thaliana\_79295433:0.03964940278400410495,(Plantae-Arabidopsis\_thaliana\_30678347:0.00000121823947223981,(Plantae-Arabidopsis\_thaliana\_30678350:0.00000121823947223981,Plantae-Arabidopsis\_thaliana\_30678353:0.00000121823947223981)27:0.00000121823947223981)95:0.00000121823947223981)94:0.05900746426971138076)100:0.16556016541124052299)86:0.1249808550555804609)84:0.16561767681007563691,(Plantae-Physcomitrella\_patens\_205864:0.16950143353395050183,Plantae-Physcomitrella\_patens\_162454:0.10771061149221833331)100:0.36772104629164398260)35:0.04490140841366047769)71:0.18765846101532637769)99:0.20173688700015024455,Plantae-Physcomitrella\_patens\_147703:0.31061355874891777296)76:0.06737760204312501222,Plantae-Physcomitrella\_patens\_123406:0.15367015059478159045);

Plantae-Chlamydomonas\_reinhardtii\_104193

(Cyanobacteria-Cyanothece\_sp.\_CCY0110\_126658167:0.06825500980045920429,(((Cyanobacteria-Nostoc\_sp.\_PCC\_7120\_17228722:0.01205630852563517597,Cyanobacteria-Anabaena\_variabilis\_ATCC\_29413\_75906868:0.01583521251112155262)97:0.01833548008834672352,(Cyanobacteria-Nodularia\_spumigena\_CCY9414\_119509215:0.05366903712111954078,Cyanobacteria-Nostoc\_punctiforme\_PCC\_73102\_23130352:0.03731931054360528716)42:0.00668387104419814696)100:0.08780551874821448943,(Cyanobacteria-Thermosynechococcus\_elongatus\_BP-1\_22298534:0.10930303387252081337,((Bacteria-Prosthecochloris\_vibrioformis\_145219156:0.04733748722683246701,(Bacteria-Pelodictyon\_luteolum\_78186164:0.07916317931282931819,Bacteria-Chlorobium\_phaeobacteroides\_119358060:0.19576701636332677348)75:0.05474044510736555957)100:0.50178095710415870911,(((Chlamydia-Candidatus\_Protoclhamydia\_46447621:1.16991085293136665157,((Chlamydia-Candidatus\_Protoclhamydia\_46447213:0.63551342894129780881,(Plantae-Ostreococcus\_tauri\_10633:0.23089778000282901171,Plantae-Ostreococcus\_lucimarinus\_31136:0.09832583542072138860)100:0.57003376249287907029,(Plantae-Chlamydomonas\_reinhardtii\_104193:0.30468449541285258508,Plantae-Volvox\_carteri\_108215\_jgi:0.21940800228216100765)100:0.25811468879567117662)100:0.26535528426780302658)99:0.35814892966481892689,(Bacteria-Marinomonas\_sp.\_152997627:0.78369919172557933607,(Bacteria-Psychrobacter\_sp.\_148654121:0.59025747546271634114,(Bacteria-Alcanivorax\_borkumensis\_110835023:0.43366052195557247551,((Bacteria-Ralstonia\_eutropha\_73541045:0.12805629193434961421,Bacteria-Burkholderia\_phytofirmans\_118044115:0.1321777051779097675)100:0.53467859605574730164,(Bacteria-Delftia\_acidovorans\_118729031:0.21765234568106889279,Bacteria-Acidovorax\_avenae\_120609942:0.12340203083271560069)100:0.15748583373907051874,Bacteria-Polaromonas\_naphthalenivorans\_121604209:0.22388901285814627462)100:0.17195089304227115234)84:0.15224665037083340291,(Bacteria-Shewanella\_denitrificans\_91793740:0.67375372291582869000,Bacteria-marine\_gamma\_119504827:0.71080329394531249765)14:0.06647818577003902774)29:0.11300006847936368282)48:0.15298



823288108859275)90:0.21431855869996810360)100:0.46952175281178853972,(Bacteria-Desulfuromonas\_ acetoxidans\_95931069:1.26425217687355062601)43:0.11002433528065330703)100:0.31607388181411721906,(Bacteria-Herpetosiphon\_ aurantiacus\_113940803:0.22814177529892171181,(Bacteria-Roseiflexus\_sp.\_148655022:0.15815889759622275834,(Bacteria-Chloroflexus\_ aggregans\_118047790:0.22321047221984283149)74:0.08806659182583756462)100:0.48810228386710519111)90:0.16648277969064184667)17:0.03903838609645404051,(Bacteria-Saccharopolyspora\_ erythraea\_134103510:0.87138781116199104382)10:0.04236182968162195694,(Bacteria-Anaeromyxobacter\_sp.\_153006747:0.72145394718088207142,(Bacteria-Treponema\_ denticola\_42528231:0.93027393256217705275,(Bacteria-Geobacter\_ bemidjensis\_145618691:0.38486562630378684524,(Bacteria-Pelobacter\_ carbinolicus\_77919588:0.50423913470314130070)92:0.17988801967670833837)20:0.03768375038305546432)14:0.09788338492079197428,(((Bacteria-Dechloromonas\_ aromatica\_71909277:0.34976299779481895280,(Bacteria-Hahella\_ chejuensis\_83648649:0.39536951778399320734)100:0.29053064289128638364,(Bacteria-Sphingomonas\_ wittichii\_148553172:0.40265105278913299047,(Bacteria-Rhodobacter\_ sphaeroides\_126462226:0.24553499547496440703,(Bacteria-Roseobacter\_ denitrificans\_110679975:0.34389842521249847085,(Bacteria-Silicibacter\_sp.\_99081204:0.22157678754714374425)82:0.07561444271836682829,(Bacteria-Paracoccus\_ denitrificans\_119386836:0.45291427587194726945,(Bacteria-Roseovarius\_sp.\_114762893:0.11176152006391681937,(Bacteria-Sagittula\_ stellata\_126731334:0.11466600934260579026)99:0.08474724374294387297)37:0.05045319501596661621)99:0.15519767921812158140)67:0.09094427056918014118,(Bacteria-Methylobacterium\_ chloromethanicum\_156449364:0.45086964891693404045,(Bacteria-Ochrobactrum\_ anthropi\_153009400:0.42368588200042534009,(Bacteria-Aurantimonas\_sp.\_90419633:0.40093764951730520574)94:0.16849006306851641024)80:0.09670609464643914466)100:0.33428465584668087818)98:0.17468007016009354238)98:0.25918679961707835613,(Bacteria-delta\_proteobacterium\_94266587:0.92820852252944774374)1:0.03101341242125732478,(Bacteria-Moorella\_ thermoacetica\_83589019:0.56389673115279770332,(((Bacteria-Caldicellulosiruptor\_ saccharolyticus\_146295635:0.78295608467838195832,(Bacteria-Carboxydotherrmus\_ hydrogenoformans\_78044326:0.30672099215066678246)11:0.11967231556087867816,(Bacteria-Desulfotomaculum\_ reducens\_134298050:0.31384301057240820976,(Bacteria-Pelotomaculum\_ thermopropionicum\_147676594:0.23475684817638045598)43:0.05200873504569256123)8:0.07362264680806250572,(((Bacteria-Thermosinus\_ carboxydovorans\_121535055:0.29658709850469472391,(((Bacteria-Alkaliphilus\_ metalliredigens\_150392209:0.28009213127456561443,(Bacteria-Clostridium\_ difficile\_126701180:0.31672558470646494655,(Bacteria-Thermoanaerobacter\_ ethanolicus\_114843410:0.26863363689672614676)48:0.05825035781620388486)90:0.08656188161577296758,(Bacteria-Ruminococcus\_ torques\_153815945:0.22570677394354041190,(Bacteria-Dorea\_ longicatena\_153853506:0.1467372096853135909)100:0.25095302917422024347)75:0.10814147538041442298)25:0.05325072330710769325,(Bacteria-Symbiobacterium\_ thermophilum\_51894293:0.51825985107974315014,(Bacteria-Bacillus\_sp.\_126653300:0.13327701629996044352,(Bacteria-Lactobacillus\_ brevis\_116333187:0.50775536032259693808,(Bacteria-Listeria\_ welshimeri\_116871611:0.12733122813421085540)83:0.11186662314798716256)100:0.42439885817205563745)32:0.10979488575773400927)16:0.04198625198472247244)14:0.07755088465631516936)19:0.0830662342323726322)1:0.02217298469497267638)1:0.05595814399103027359)47:0.11574910212601376147)100:0.50587940733714198416,(Cyanobacteria-Synechococcus\_sp.\_JA-2-3Ba2-13\_86609094:0.18812354076065163078)54:0.10764327985079905070)52:0.04158375519825259492)70:0.05572041112191995077,(Cyanobacteria-Lyngbya\_sp.\_PCC\_8106\_119486469:0.18450532910954361987)95:0.07229941572680512185,(Cyanobacteria-Synechocystis\_sp.\_PCC\_6803\_16331567:0.21219157691640291863)100:0.10740116367117155671,(Cyanobacteria-Crocospaera\_ watsonii\_WH\_8501\_67924974:0.06683644606227977236);

Plantae-Chlamydomonas\_ reinhardtii\_139405

((Bacteria-Saccharopolyspora\_ erythraea\_134101758:0.37673833554219932074,(Bacteria-Thermobifida\_ fusca\_72162442:0.29343200148379378067,(((Bacteria-Roseiflexus\_sp.\_148656197:0.41196510397812818871,(Bacteria-Candidatus\_ Desulfococcus\_121541644:0.74898747062233062000,(Bacteria-Anaeromyxobacter\_ dehalogenans\_86157471:0.58941096489265643044)28:0.05632323142631570634)48:0.09884213763850956125,(((Bacteria-Pedobacter\_sp.\_149275976:0.34161856339362273172,(Bacteria-Cytophaga\_ hutchinsonii\_110637940:0.28351988297825903018)27:0.03610178416519307931,(Bacteria-Microscilla\_ marina\_124002514:0.38187732479145453102)22:0.04740676001211944351,(((Bacteria-Desulfuromonas\_ acetoxidans\_95929912:0.18324950844089263335,(Bacteria-Bacteroides\_ caccae\_153807144:0.13866791283576704319,(Bacteria-Parabacteroides\_ distasonis\_150009644:0.11825387634302750306)97:0.08064301727138974141)95:0.08984739636825415932,

((Bacteria-Flavobacterium\_johnsoniae\_146298313:0.15552941091020192066,Bacteria-Flavobacteria\_bacterium\_89889440:0.30721891551689284316)100:0.12144344341684246147,(Bacteria-unidentified\_eubacterium\_149371964:0.16449430441522380764,Bacteria-Gramella\_forsetii\_120434482:0.16918290896667670387)90:0.05774047669220284951)92:0.07474480903684375954)64:0.04524582266612631881)25:0.04981587034372766259,Bacteria-Algoriphagus\_sp.\_126645189:0.21570245953804395578)100:0.31513764490592166556,((Chromalveolata-Phytophthora\_sojae\_124508:0.58360473857182393331,(Excavata-Naegleria\_gruberi\_75743-fgeneshNG\_pg.scaffold\_84000052:0.61610043258329438842,(Opisthokonta-Apis\_mellifera\_66529862:0.53642056448404329405,Opisthokonta-Drosophila\_melanogaster\_20130383:0.31593210172346808395)100:0.41729975106802280616)92:0.14646083235511353493)93:0.12777406466202098634,(((Chlamydia-Chlamydia\_muridarum\_15834952:0.07900959204166853322,(Chlamydia-Chlamydia\_trachomatis\_15604781:0.00000121823947223981,Chlamydia-Chlamydia\_trachomatis\_76788775:0.0024576367493383879)100:0.06294776464235349311)100:0.18379629161599339571,(((Chlamydia-Chlamydia\_pneumoniae\_33241703:0.00000121823947223981,Chlamydia-Chlamydia\_pneumoniae\_16752679:0.00000121823947223981)54:0.00000121823947223981,Chlamydia-Chlamydia\_pneumoniae\_15618276:0.00247534638026705896)59:0.00000121823947223981,Chlamydia-Chlamydia\_pneumoniae\_15835894:0.00247915831819011919)100:0.26632264762956869841,(Chlamydia-Chlamydia\_pneumoniae\_62185046:0.06392626358809498643,(Chlamydia-Chlamydia\_pneumoniae\_89898384:0.09116440202215184141,Chlamydia-Chlamydia\_pneumoniae\_29840193:0.07645104664389383575)68:0.03683029345224593520)99:0.13151733368357845788)91:0.12214419015883486164)100:0.65394635780442844641,(Chlamydia-Candidatus\_Protoclamydia\_46446803:0.37391748802002988672,(((Plantae-Chlamydomonas\_reinhardtii\_139405:0.07571051401325484820,Plantae-Volvox\_carteri\_83275\_jgi:0.06625724818795990234)100:0.22159457657125741781,(((Plantae-Ostreococcus\_lucimarinus\_36202:0.36274282247423245140,Plantae-Ostreococcus\_tauri\_15385:0.38266792558155909854)75:0.10279851448540978931,(((Plantae-Oryza\_sativa\_115436768:0.18595602604582367468,Plantae-Arabidopsis\_thaliana\_15232946:0.20800849256209519300)97:0.10829535332297797467,Plantae-Physcomitrella\_patens\_62167:0.22506668285492004156)99:0.13308055595481135813)48:0.04737390342660465631)99:0.12465171412370484871,Plantae-Cyanidioschyzon\_merolae\_CMQ275C:0.42445701878243352612)89:0.07867285237234430961)100:0.17757232206271941766)90:0.10953718386196957535)87:0.08307993333544186343)22:0.05230780585672085981)90:0.10108371562795821774,(((Bacteria-Geobacillus\_thermodenitrificans\_138896346:0.19489921102264093355,Bacteria-Bacillus\_cereus\_152977028:0.1738772779174559545)54:0.04695238718209549661,((Bacteria-Lactococcus\_lactis\_125623269:0.16048610858067158258,Bacteria-Streptococcus\_pyogenes\_15674319:0.15380067189661861260)100:0.38535978323257452649,(((Bacteria-Lactobacillus\_gasseri\_116628855:0.20381073846091657398,Bacteria-Leuconostoc\_mesenteroides\_116619116:0.42252876977223030597)100:0.15863567054327554207,Bacteria-Listeria\_welshimeri\_116873028:0.24518626830270809358)100:0.08388294827292092082,Bacteria-Staphylococcus\_saprophyticus\_73662343:0.36261461295859953591)97:0.07366322550918499856)55:0.03333804137200781920)34:0.06173163726216262387,Bacteria-Desulfotobacterium\_hafniense\_109647650:0.40259254568064856139)64:0.07514289781448102445,((Bacteria-Psychromonas\_sp.\_90407450:0.21382375800481112638,((Bacteria-marine\_gamma\_119502753:0.32517630087011251128,(Bacteria-Oceanospirillum\_sp.\_89095105:0.16891408553095080269,Bacteria-Oceanobacter\_sp.\_94502122:0.17816903838105624391)51:0.02699936071836281024)49:0.03548703723923325726,Bacteria-Marinomonas\_sp.\_152995102:0.25752998560574041909)94:0.10789865906003974494)100:0.17160090770394212378,(((Bacteria-Sodalis\_glossinidius\_85059426:0.12212224548517520983,(Bacteria-Yersinia\_pseudotuberculosis\_153948792:0.03887763127984072975,Bacteria-Serratia\_proteamaculans\_157370459:0.07103224279401640362)73:0.01967791330129379720)85:0.03068061685390450002,(((Bacteria-Shigella\_sonnei\_74312035:0.00000121823947223981,Bacteria-Escherichia\_coli\_15802051:0.00000121823947223981)100:0.02840761241829359643,Bacteria-Salmonella\_enterica\_16760464:0.00700321016219394334)67:0.01413741623180944477,((Bacteria-Klebsiella\_pneumoniae\_152970527:0.01204356056366379102,Bacteria-Citrobacter\_koseri\_157145898:0.01349684696850844516)36:0.00546383457302799819,Bacteria-Enterobacter\_sakazakii\_156934169:0.03626465502296627452)38:0.00841100610423431774)83:0.04236593775324004607)100:0.11519916497790358423,(Bacteria-Vibrio\_angustum\_90577965:0.00111459564801568334,Bacteria-Photobacterium\_sp.\_89076033:0.02497914225496796273)100:0.20804580702812414117)99:0.11166955493225012852,((Bacteria-Chromobacterium\_violaceum\_34498527:0.16799908378433328626,Bacteria-Dechloromonas\_aromatica\_71908788:0.15956224837431706720)82:0.09467069698615879214,Bacteria-Neisseria\_meningitidis\_15677671:0.25068433988589783334)49:0.04419399145402747725)51:0.06094691309737498147)100:0.27326615286404420946)85:0.06568061873839217690)100:0.19976901566311144887)68:0.05910002487070996346)84:0.06

753955671189229570,(((Bacteria-Clavibacter\_michiganensis\_148273171:0.25980771557431414642,Bacteria-Arthrobacter\_aurescens\_119960707:0.17173807386202008529)98:0.16094430761618089276,(Bacteria-Actinomyces\_odontolyticus\_154509115:0.30348026828647839404,Bacteria-Bifidobacterium\_adolescentis\_154488639:0.50588681445364513944)74:0.09003141643948722739)74:0.08066502651426316062,Bacteria-Streptomyces\_avermitilis\_29833001:0.16956219438793604382)87:0.08481710853126794847,Bacteria-Nocardioides\_sp.\_119716211:0.33018995341914536557);

Plantae-Chlamydomonas\_reinhardtii\_155606

(Bacteria-Ralstonia\_eutropha\_73542207:0.12002709172980793872,(((Bacteria-Rhodospirillum\_rubrum\_119900860:0.11689334269063432481,Bacteria-Polaromonas\_naphthalenivorans\_121604633:0.11200987903843655225)100:0.16782649671817773118,Bacteria-Polynucleobacter\_sp.\_145588803:0.15645032067118255781)63:0.05889323789995537517,(((Bacteria-Nitratiruptor\_sp.\_152990309:0.57169009804870274394,(((Bacteria-Dorea\_longicatena\_153853240:0.09021290018809877131,Bacteria-Ruminococcus\_obeum\_153812754:0.17475966259795480684)100:0.23046153099308319678,Bacteria-Clostridium\_difficile\_126698375:0.38986153904307635498)80:0.09660917020010532930,(((Chromalveolata-Aureococcus\_anophagefferens\_14447:0.61205163933036776935,(Chromalveolata-Thalassiosira\_pseudonana\_34698:0.20277436580712665526,Chromalveolata-Phaeodactylum\_tricornutum\_13791:0.15489989821730881792)100:0.35131866123348098885)92:0.23015188355539351051,(Plantae-Cyanidioschyzon\_merolae\_CMQ012C:1.21253683804141809688,(Plantae-Volvox\_carteri\_120889\_jgi:0.16207150121947361265,Plantae-Chlamydomonas\_reinhardtii\_155606:0.02642021793998287210)100:0.45486808551719676297,(Plantae-Physcomitrella\_patens\_74110:0.24369479138092864368,(Plantae-Oryza\_sativa\_115464935:0.25749540799366049670,Plantae-Arabidopsis\_thaliana\_18400953:0.10502002140538994890)100:0.42774453861230216090)98:0.24962691153114069387,(Plantae-Ostreococcus\_tauri\_32784:0.24670619197491508445,Plantae-Ostreococcus\_lucimarinus\_31615:0.06951524047271036288)100:0.42413018123195811437)33:0.05577035551997758245)70:0.18803664605945025201)55:0.09102573976162051106)81:0.17402749558897012694,(Chlamydia-Candidatus\_Proteochlamydia\_46446962:0.28933712441839404272,((Chlamydia-Chlamydophila\_pneumoniae\_33241926:0.0000121823947223981,((Chlamydia-Chlamydophila\_pneumoniae\_15618484:0.0000121823947223981,Chlamydia-Chlamydophila\_pneumoniae\_15836104:0.0000121823947223981)28:0.0000121823947223981,Chlamydia-Chlamydophila\_pneumoniae\_16752465:0.0000121823947223981)19:0.0000121823947223981)99:0.06943985166831251332,(Chlamydia-Chlamydia\_muridarum\_15835357:0.01544973360270749350,(Chlamydia-Chlamydia\_trachomatis\_15605184:0.00855745650215312612,Chlamydia-Chlamydia\_trachomatis\_76789193:0.0000121823947223981)98:0.01057927530901202513)100:0.08919909898033856477,(Chlamydia-Chlamydophila\_caviae\_29839936:0.03419371535137689933,Chlamydia-Chlamydophila\_abortus\_62184810:0.03954097846598216004)45:0.01628079887864936418,Chlamydia-Chlamydophila\_felis\_89898645:0.05179450452983178771)69:0.04143122164786104678)87:0.09639737163463399372)98:0.32774060304922508768)92:0.14487622958862142464)90:0.32599586241951750143,(((Bacteria-Roseovarius\_sp.\_114762980:0.05269170319049649998,(Bacteria-Dinoroseobacter\_shibae\_118734753:0.03534498076352769053,(Bacteria-Rhodobacterales\_bacterium\_126727914:0.09580548614221770509,((Bacteria-alpha\_proteobacterium\_114771672:0.20514942023210219757,Bacteria-Jannaschia\_sp.\_89055871:0.09299735597403335774)52:0.03460538248615783324,Bacteria-Oceanicola\_granulosus\_89071234:0.07245453636964062361)12:0.01835312479321055470)29:0.03702518351631740173)60:0.04933783067567026198,Bacteria-Roseobacter\_sp.\_149914396:0.07064247113291546865)51:0.04348509632945464498)100:0.15057970210425425384,(((Bacteria-Nitrobacter\_hamburgensis\_92118985:0.08920028293750946469,(Bacteria-Bradyrhizobium\_japonicum\_27376645:0.06334888746984651542,Bacteria-Rhodopseudomonas\_palustris\_115526759:0.08326321131727680569)52:0.01788981773168135322)100:0.12795228916599746261,(Bacteria-Methylobacterium\_sp.\_149124304:0.18532062900096912816,Bacteria-Xanthobacter\_autotrophicus\_154246991:0.10234006669440925963)77:0.05363428099197331544)56:0.04486594939352527706,Bacteria-Parvibaculum\_lavamentivorans\_154252561:0.24737915396088877573)97:0.14729358099345840616,(((Bacteria-Ochrobactrum\_anthropi\_153008531:0.08905077337884818867,Bacteria-Bartonella\_bacilliformis\_121602842:0.15134999060343273802)28:0.02123940771371084571,Bacteria-Mesorhizobium\_sp.\_110635521:0.07339706320165960418)47:0.02734950698152237292,(Bacteria-Aurantimonas\_sp.\_90418962:0.15014648353444121076,(Bacteria-Sinorhizobium\_medicae\_150397839:0.03810989144907962756,(Bacteria-Agrobacterium\_tumefaciens\_15891221:0.06998633509954672871,Bacteria-Rhizobium\_leguminosarum\_116253722:0.08589561886863739115)38:0.01981159096945931189)73:0.06048071397034363028)42:0.01990886189899582215)94:0.09134040698155190818)84:0.08537884473065641966)100:0.31543697082441068957,(Bacteria-Bacillus\_subtilis\_16079834:0.27407910869862117664,Bacteria-

Geobacillus\_thermodenitrificans\_138896161:0.20000395993709960130)85:0.12311986112632597457,((Bacteria-  
Leuconostoc\_mesenteroides\_116618556:0.17733433115377611466,Bacteria-  
Oenococcus\_oeni\_116490816:0.12064690698052762952)100:0.19185410411072409409,Bacteria-  
Lactobacillus\_acidophilus\_58337048:0.29420598866684205541)97:0.17905004469117247190)66:0.09644661126907344562)1  
3:0.02122383543296823064)10:0.04452979429572453962)44:0.06622468713777901472)18:0.04980963049883913724,(Bacter  
ia-delta\_proteobacterium\_94264072:0.39206797458310199689,(Bacteria-  
Geobacter\_bemidjiensis\_145620538:0.33691282383933451872,((Bacteria-  
Myxococcus\_xanthus\_108761477:0.27547811375397673883,Bacteria-  
Anaeromyxobacter\_sp.\_153003533:0.26026464052918629744)100:0.31187841090320156390,((Bacteria-  
Petrotoga\_mobilis\_145622827:0.23708515584437933610,(Bacteria-  
Thermosiphon\_melanesiensis\_150020877:0.10633745417023938995,Bacteria-  
Fervidobacterium\_nodosum\_154249785:0.14309001574593685491)100:0.18545640564121132488)100:0.18403052788462526  
124,(((Bacteria-Frankia\_sp.\_86740074:0.25372504293521397356,Bacteria-  
Acidothermus\_cellulolyticus\_117928553:0.15649071162385533307)60:0.07313462820760281702,(Bacteria-  
Salinispora\_arenicola\_119881213:0.12609585577189488803,(Bacteria-  
Mycobacterium\_smegmatis\_118467795:0.14130291380663614897,Bacteria-  
Thermobifida\_fusca\_72162495:0.09562943288794556462)39:0.03085312665313836786)25:0.01035169940904161548)35:0.04  
088232348755105328,Bacteria-  
Leifsonia\_xyli\_50954745:0.23331118232294623116)99:0.44288311357547721636)37:0.06595040357007352083)22:0.0486931  
7247929583203)12:0.04229280978763352156)10:0.02526998987301152036)65:0.06706350520444957775,Bacteria-  
Magnetococcus\_sp.\_117923793:0.31220555690723167386)64:0.04431183567145597496,(Bacteria-  
Methylococcus\_capsulatus\_53804482:0.27249000372040682594,Bacteria-  
Pseudomonas\_putida\_119859094:0.26844028199169384097)77:0.08060871179104714401)100:0.18909992716924919898)46:0  
.03825472659003174847,Bacteria-Bordetella\_bronchiseptica\_33600856:0.22312992907458584213);

Plantae-Chlamydomonas\_reinhardtii\_196649

(((Bacteria-Algoriphagus\_sp.\_126646068:0.15575604660265945922,(Bacteria-  
Flavobacterium\_psychrophilum\_150024270:0.14796761571776068100,(Bacteria-  
Gramella\_forsetii\_120437698:0.09574000104277471945,Bacteria-  
Psychroflexus\_torquis\_91215426:0.13280915447875490942)97:0.07020617432347621423)94:0.10021655536697728073)63:0.  
05296117993942617286,(Bacteria-Cytophaga\_hutchinsonii\_110636534:0.19909470170729670624,(Bacteria-  
Flavobacteria\_bacterium\_126662278:0.33018079713062153946,Bacteria-  
Microscilla\_marina\_124008182:0.13911099243720165264)74:0.06984458628979485495)29:0.02409252045202556897)23:0.02  
511397875388277079,(((Bacteria-Symbiobacterium\_thermophilum\_51892185:0.19098186152271809379,(((Bacteria-  
Actinobacillus\_pleuronemum\_126207739:0.20361478919077966032,((Bacteria-  
Serratia\_proteamaculans\_157368330:0.08689535653442635732,Bacteria-  
Enterobacter\_sakazakii\_156935949:0.01699264189751282031)68:0.02028855493542333979,Bacteria-  
Sodalis\_glossinidius\_85057995:0.09987009083466447112)72:0.01627529362924208869)100:0.12298292589452806955,Bacter  
ia-Deinococcus\_geothermalis\_94984937:0.12751111945786594570)94:0.07132054123216727270,(((Bacteria-  
Chromohalobacter\_salexigens\_92115375:0.19601754642317395505,(Bacteria-  
Stenotrophomonas\_maltophilia\_119876252:0.11286803472829394501,Bacteria-  
Pseudomonas\_putida\_126357451:0.12890991294770323683)38:0.03916065536348765919)43:0.03588274643190552532,(Bact  
eria-Bordetella\_bronchiseptica\_33599841:0.21654244364303890102,Bacteria-  
Delftia\_acidovorans\_118732644:0.14945603357625278362)20:0.04229829942675721738)37:0.03625386086256694729,Bacteri  
a-  
Aeromonas\_hydrophila\_117621382:0.15996267716272433157)96:0.08076122264139121154)81:0.05449699976967482123,((E  
xcavata-Naegleria\_gruberi\_69926-fgenesHNG\_pg.scaffold\_37000082:0.79200530515320299862,Bacteria-  
Lactococcus\_lactis\_116511268:0.30957329149564355442)5:0.02177437859093940206,(((Chlamydia-  
Chlamydia\_trachomatis\_76789016:0.00000121823947223981,Chlamydia-  
Chlamydia\_trachomatis\_15605015:0.00000121823947223981)100:0.53075244196666493401,(Chromalveolata-  
Phytophthora\_sojae\_109207:0.22107618959944419501,(Chromalveolata-  
Aureococcus\_anophagefferens\_59085:0.33167926729989805068,Plantae-  
Galdieria\_sulphuraria\_HET\_2D8\_1:0.33057111784468867777)86:0.13167834705424180664)65:0.08074832964420923520)100  
:0.30331490417505663215,(Bacteria-Borrelia\_burgdorferi\_15594498:0.65128658957394025553,Bacteria-  
Thermus\_thermophilus\_46198497:0.18361527785099310273)63:0.13666837890834079849)14:0.03469724902483240642)4:0.0  
5924328743506868805)5:0.03405343516668986326)3:0.05138251999150016819,(((Chromalveolata-  
Aureococcus\_anophagefferens\_6356:0.51254697646805280620,((Chromalveolata-  
Isochrysis\_galbana\_Contig1364\_3:0.10618233816330516217,(Chromalveolata-  
Karenia\_brevis\_Kb\_AUAO\_R\_45G22\_4:0.05071757569150456973,Chromalveolata-  
Karenia\_brevis\_Contig4287\_5:0.20135304123669414689)88:0.06562077290453725842)100:0.21048615229555833750,Chrom  
alveolata-  
Pavlova\_lutheri\_PLE00008434\_5:0.19521548631102719762)35:0.04677477770140254371)21:0.09107810395660648206,((Bac

teria-Chloroflexus aggregans\_118047452:0.17942406036972377570,((Plantae-  
Cyanidioschyzon merolae\_CMT028C:0.68887522778399135071,Bacteria-  
Clostridium difficile\_126699235:0.22936225125871836927)16:0.09999539556051023625,Bacteria-  
Lactobacillus sakei\_81428506:0.35828893554437135638)17:0.12038799518188057769)5:0.03334345419174688380,((Plantae  
-Porphyra yezoensis\_Contig2003\_2:0.24829382072036640383,(Plantae-  
Galdieria sulphuraria\_Contig577\_1:0.16205831852840624219,Plantae-  
Cyanidioschyzon merolae\_CMN023C:0.15561498665705986166)83:0.06504241320228314194)56:0.04690222534648424979,(  
Plantae-Chlamydomonas reinhardtii\_53941:0.05815831289560240841,Plantae-  
Volvox carteri\_108150\_jgi:0.0683134915906917911)98:0.17853061115744320309)52:0.03819163794488018154,((Chromalv  
eolata-Phaeodactylum tricorutum\_12583:0.08520030662823217804,Chromalveolata-  
Thalassiosira pseudonana\_32874:0.03432356119821358686)100:0.44049604233391814745,((Plantae-  
Chlamydomonas reinhardtii\_196647:0.00000121823947223981,Plantae-  
Chlamydomonas reinhardtii\_196649:0.00000121823947223981)100:0.29786325801819196757,Plantae-  
Volvox carteri\_72831\_jgi:0.35772469027329006908)100:0.48049772008803154355,(Plantae-  
Chlamydomonas reinhardtii\_115390:0.29723820788339061494,(Plantae-  
Volvox carteri\_91989\_jgi:0.36076035064062889068,Plantae-  
Chlamydomonas reinhardtii\_114882:0.00501517444038986331)92:0.32730391485454263245)97:0.34834931390833667741)5  
0:0.08690916885712866857)8:0.04829525022152209718)18:0.09142517440345258872)1:0.01379917342989368974)2:0.01853  
942519111505260,Bacteria-Salinibacter ruber\_83816288:0.41805360138541336479)1:0.01735246099070226339,((Bacteria-  
Herpetosiphon aurantiacus\_113942066:0.45965311855197737989,Chromalveolata-  
Emiliana huxleyi\_Contig23\_6:0.75457790172312921850)4:0.02478074325008397527,(Bacteria-  
Roseiflexus\_sp.\_148657343:0.21489060915260474460,(Bacteria-  
Acidobacteria\_bacterium\_94970720:0.19010555133902998226,((Cyanobacteria-  
Trichodesmium erythraeum\_IMS101\_113477925:0.34214056695028710608,Cyanobacteria-  
Nostoc punctiforme\_PCC\_73102\_23126478:0.13409593924081308902)39:0.05487547166265345500,((Cyanobacteria-  
Crocospaera watsonii\_WH\_8501\_67920506:0.34453517342581357896,Bacteria-  
Rhodospseudomonas palustris\_115522220:0.44302678335520517816)12:0.03298749944323655509,(Cyanobacteria-  
Gloeobacter violaceus\_PCC\_7421\_37520251:0.18609206109757744918,((Cyanobacteria-  
Anabaena variabilis\_ATCC\_29413\_75907667:0.02580554924236232867,((Cyanobacteria-  
Nostoc punctiforme\_PCC\_73102\_53688908:0.09500906666368788556,Cyanobacteria-  
Nodularia spumigena\_CCY9414\_119510926:0.09383341101107575688)98:0.09877985614074462350,Cyanobacteria-  
Nostoc\_sp.\_PCC\_7120\_17227566:0.00000121823947223981)24:0.00311366950611134327)97:0.13805665279842593840,Cyan  
obacteria-Thermosynechococcus elongatus\_BP-  
1\_22297580:0.44454757391206756179)14:0.05136948959634868306)11:0.04753614316817034863)3:0.025782945529603751  
30)9:0.04256043892658664674)17:0.06328966452008680244)6:0.02596392694171790333)2:0.04685169510057847486)3:0.03  
233294219424972388)28:0.06565425948743766615,((Excavata-  
Jakoba bahamiensis\_109793011\_2:0.33742110228461907884,Excavata-  
Malawimonas californiana\_Contig63\_3:0.40389842487582855446)100:0.20449445574300584294,((Bacteria-  
Methylibium petroleiphilum\_124267667:0.04719757332269441247,(Bacteria-  
Dechloromonas aromatica\_71908825:0.14342864381362760429,(Bacteria-  
Acidovorax avenae\_120611237:0.01460309994602879829,Bacteria-  
Verminephrobacter eiseniae\_121611788:0.06540001026227849901)99:0.08205356340401029347)45:0.0356983453956859694  
8)100:0.22042096387593534956,Bacteria-  
Shewanella loihica\_127512762:0.15897682672168791940)85:0.09662480106639011190,((Bacteria-  
Roseobacter denitrificans\_110679070:0.12182431380799403631,Bacteria-  
alpha\_proteobacterium\_114771855:0.12220122915156426957)100:0.38615842900488833722,(Plantae-  
Arabidopsis thaliana\_I5241373:0.33208615761826504320,Plantae-  
Volvox carteri\_109532\_jgi:0.20734160926765388133)98:0.16126741858519472173)47:0.08889110191227519997)63:0.06482  
500369804222728)100:0.23437232213936223801,(Bacteria-  
Dichelobacter nodosus\_146328771:0.36117248151729558492,((Bacteria-  
Vibrio vulnificus\_27364653:0.10647237262489958609,Bacteria-  
Vibrionales\_bacterium\_148977227:0.13540179474461280784)95:0.09854990151478337790,Bacteria-  
Photobacterium\_sp.\_89073346:0.31139365224539328203)82:0.04995645977048478875)99:0.16648153555222330868)26:0.04  
090497253298213537)1:0.02485245288796085819)7:0.05014159309643249907,((Bacteria-  
Pedobacter\_sp.\_149277715:0.33681518758920270251,(Bacteria-  
Xanthomonas oryzae\_58582451:0.22309296628265667950,(Bacteria-  
Xylella fastidiosa\_28198774:0.18670863306578891483,(Cyanobacteria-  
Synechococcus\_sp.\_RS9917\_87124639:0.31420074740088499432,Cyanobacteria-  
Synechococcus\_sp.\_WH\_5701\_87301174:0.35089662558423495575)14:0.05840121199526431689)12:0.039539134447100367  
23)20:0.04313594154049504165)4:0.02982855714536089553,(Bacteria-  
Wolinella succinogenes\_34558145:0.16599335960281746960,Bacteria-  
Caulobacter crescentus\_16126021:0.29372113657618037497)49:0.08485746198360256953)13:0.07873305995461761519,Bact

eria-

Hyphomonas\_neptunium\_114798697:0.15146090126771336037)40:0.13344198117771918777)70:0.05879896406264115832,(  
Bacteria-Alkalilimnicola\_ehrlichei\_114320262:0.18413603381655768709,Bacteria-  
Halorhodospira\_halophila\_121998934:0.14914624673342477545)97:0.09575217498134919181,Bacteria-  
Thiomicrospira\_crunogena\_78484582:0.19304202848175625040);

Plantae-Chlamydomonas\_reinhardtii\_503

((Bacteria-Halothermothrix\_oreni\_89210654:0.34831690857568275987,(((Bacteria-  
Thermosinus\_carboxydvorans\_121534014:0.40117679951692586382,Bacteria-  
Caldicellulosiruptor\_saccharolyticus\_146295820:0.40496183295933019242)65:0.08320177093086948694,(Bacteria-  
Desulfotomaculum\_reducens\_134299316:0.36946119919657954833,Bacteria-  
Bacillus\_cereus\_42784071:0.44297918359022470103)25:0.05481261198587542016)35:0.05958697188658354515,(((Bacteria-  
Bacteroides\_capillosus\_154500435:0.67143902285021661580,(Bacteria-  
Ruminococcus\_obeum\_153810465:0.13355459251350737526,(Bacteria-  
Eubacterium\_ventriosum\_154483643:0.15861422353133533547,(Bacteria-  
Dorea\_longicatena\_153853052:0.11287727783627912737,Bacteria-  
Clostridium\_phytofermentans\_106885561:0.26591728759846827712)37:0.03761827343996564793)47:0.041281734615911717  
94)100:0.23593848542804274349)87:0.17235317879856074108,(((Chlamydia-  
Candidatus\_Protoclamydia\_46447230:0.64163089758488056624,(Plantae-  
Ostreococcus\_lucimarinus\_48511:0.45416846067857735703,Plantae-  
Chlamydomonas\_reinhardtii\_185710:0.31948132717157706750)100:0.44104958845280356483)100:0.60901219663262040616,  
(((Bacteria-Roseiflexus\_castenholzii\_156742747:0.55634449853890632909,Bacteria-  
Psychromonas\_ingrahamii\_119946006:0.72958680789435703673)76:0.17355621378032592972,(Bacteria-  
Solibacter\_usitatus\_116619448:0.48938523488721064059,Bacteria-  
Acidobacteria\_bacterium\_94970376:0.50498392493820754012)75:0.11844797950908288187)33:0.06151990922079473428,(((  
Bacteria-Stigmatella\_aurantiaca\_115374944:0.16850586602246625523,Bacteria-  
Myxococcus\_xanthus\_108760408:0.18734490355256042116)100:0.39305807652080626546,(((Bacteria-  
Desulfuromonas\_acetoxidans\_95930377:0.37774004536226707396,Bacteria-  
Thiomicrospira\_crunogena\_78484857:0.37251505162434755958)100:0.29526353956430123615,Bacteria-  
Nitrosococcus\_oceani\_77164289:0.49719277315823406926)73:0.09402041565859942107,(Bacteria-  
Halorhodospira\_halophila\_121997895:0.26385425299998610527,Bacteria-  
Alkalilimnicola\_ehrlichei\_114320117:0.21147155245912033217)100:0.38623684944367175920,Bacteria-  
Methylococcus\_capsulatus\_53804456:0.42361059410706586315)25:0.03674047031690754611)39:0.07883187315811837625,((  
Bacteria-Beggiatoa\_sp.\_153876592:0.53071780762713194335,(Bacteria-  
Nitrosomonas\_eutropha\_114330623:0.43531828172770181684,Bacteria-  
Methylobacillus\_flagellatus\_91775825:0.43324459012114263645)75:0.12531777192590037862,Bacteria-  
Azoarcus\_sp.\_56479379:0.49931460544841593796)65:0.06209609190975688697)51:0.08464022631503050065,(((Bacteria-  
Burkholderia\_xenovorans\_91778822:0.36353382030390163360,Bacteria-  
Ralstonia\_solanacearum\_17548463:0.42976262400181403089)100:0.38154288306350253590,(((Bacteria-  
Fulvimarina\_pelagi\_114705952:0.58419684480533828896,(Bacteria-  
Rhizobium\_leguminosarum\_116253854:0.16590599203388867178,Bacteria-  
Agrobacterium\_tumefaciens\_15890897:0.18147608849769156225)100:0.22896202286639288914)91:0.1229454362036675602  
0,(Bacteria-Sagittula\_stellata\_126728011:0.37807629406959081253,Bacteria-  
Roseobacter\_denitrificans\_110680078:0.26229175089836104240)100:0.18717116968338190497)55:0.11127499978029847805,  
(Bacteria-Bradyrhizobium\_japonicum\_27381570:0.36883575641639998466,(Bacteria-  
Rhodospseudomonas\_palustris\_39933459:0.26645933425659340532,Bacteria-  
Acidiphilium\_cryptum\_148259152:0.47765751678017809301)51:0.05747762118453695473)90:0.13770219644692283101)99:  
0.18677071342496687212,(Bacteria-Polaromonas\_naphthalenivorans\_121604016:0.44542700544353314163,(Bacteria-  
Yersinia\_enterocolitica\_123444184:0.35033819270499805265,Bacteria-  
Actinobacillus\_pleuropneumoniae\_126207833:0.49628545905646376246)100:0.24260626585384378884)88:0.1201102846550  
8594154)29:0.04861882685115313102)17:0.03030663131039865177,Bacteria-  
Rhodospirillum\_rubrum\_83593580:0.62120960361143962025)7:0.04240154278635720198,(Bacteria-  
Xanthomonas\_campestris\_78046007:1.01313158075658726887,Bacteria-  
Magnetospirillum\_magneticum\_83311210:0.47799940565590226527)10:0.09042783462690998086)22:0.053109795540230528  
29)47:0.08546726922689563966)96:0.22399479218015108661)18:0.08313668235555285446,(Bacteria-  
Anaeromyxobacter\_sp.\_153003016:0.39908287529603664323,(((Plantae-  
Chlamydomonas\_reinhardtii\_112896:1.08085587099091262608,(((Plantae-  
Volvox\_carteri\_72820\_jei:0.03624867844632156944,Plantae-  
Chlamydomonas\_reinhardtii\_503:0.04706311164605241765)100:0.22987152508862587763,(Plantae-  
Ostreococcus\_tauri\_28387:0.08137131838220253155,Plantae-  
Ostreococcus\_lucimarinus\_49880:0.01967319645392744815)100:0.27028779118670975823)100:0.13304528581812136157,((P  
lantae-Arabidopsis\_thaliana\_15223331:0.16489529294081650690,(Plantae-

Oryza\_sativa\_115466210:0.20729319701987394819,Plantae-  
Oryza\_sativa\_115471703:0.22037075344039233626)49:0.03632799992236265818)85:0.06528043415176397468,(Plantae-  
Physcomitrella\_patens\_120571:0.04717653408134966225,Plantae-  
Physcomitrella\_patens\_70198:0.06783649822973052135)100:0.19328586377719966793)100:0.16720718802992284857)61:0.0  
5610414331069329269)52:0.05760834790203648442,(Cyanobacteria-  
Crocospaera\_watsonii\_WH\_8501\_67924488:0.48507824751678352282,Chromalveolata-  
Guillardia\_theta\_57335306:0.77343471280454301198)55:0.07057284022913362653)100:0.36431511544157213489,(((Plantae-  
Ostreococcus\_lucimarinus\_2524:0.25973671645088963755,Plantae-  
Ostreococcus\_tauri\_27007:0.06766158104560743292)100:0.24366149453186816687,(((Plantae-  
Oryza\_sativa\_115482170:0.16237091727226110605,(Plantae-  
Arabidopsis\_thaliana\_15232051:0.11230420444202507402,(Plantae-  
Oryza\_sativa\_115467234:0.11629914529782223176,Plantae-  
Oryza\_sativa\_115448649:0.10138025528326408131)99:0.09564631359563958990)39:0.04136551683118586814)100:0.102605  
24713028251753,(Plantae-Physcomitrella\_patens\_202950:0.04176670782835284479,(Plantae-  
Physcomitrella\_patens\_177976:0.06102117475509648281,Plantae-  
Physcomitrella\_patens\_222462:0.03628309612438367082)35:0.01090984171310534386)100:0.17490018850323213462)82:0.0  
9477153823851139358,(Plantae-Chlamydomonas\_reinhardtii\_162226:0.00000121823947223981,Plantae-  
Chlamydomonas\_reinhardtii\_109372:0.00000121823947223981)100:0.06969980708597257879,Plantae-  
Volvox\_carteri\_103172\_jgi:0.03863044480039982270)100:0.22097949418781742681)37:0.07109663420469217177)100:0.281  
18849863363448716,(Plantae-Chlamydomonas\_reinhardtii\_106158:0.53143453809817653433,(Plantae-  
Ostreococcus\_tauri\_8953:0.05694794929934261785,Plantae-  
Ostreococcus\_lucimarinus\_41777:0.06626489655744181861)100:0.25112201770639619447,(((Plantae-  
Arabidopsis\_thaliana\_15237934:0.16912118603432754749,Plantae-  
Oryza\_sativa\_115466564:0.16577028932944273820)98:0.11344937734677418284,(Plantae-  
Physcomitrella\_patens\_200110:0.00000121823947223981,Plantae-  
Physcomitrella\_patens\_200113:0.00000121823947223981)100:0.19711691098678693623)89:0.10175670448823818937)100:0.  
12704132484587804530)88:0.12005443729089129712)100:0.13825417506694906433)100:0.40747495184870147211)33:0.089  
55141179287880171)14:0.06997710302914640634)29:0.08320798662868557349,Bacteria-  
Desulfovibrio\_vulgaris\_46580649:0.92089981623897432250)35:0.05461137703869503590)44:0.06516903381400621087,(Cya  
nobacteria-Crocospaera\_watsonii\_WH\_8501\_67925328:0.33921337875287882468,(Cyanobacteria-  
Prochlorococcus\_marinus\_str\_MIT\_9211\_84517893:0.14946652329608453580,(Cyanobacteria-  
Synechococcus\_sp\_RS9916\_116074565:0.05036889282309751220,(Cyanobacteria-  
Synechococcus\_sp\_WH\_7805\_88808387:0.02219486633158112426,Cyanobacteria-  
Synechococcus\_sp\_WH\_7803\_148239362:0.01860677076255752571)99:0.03830488591611434790)97:0.03992244576256100  
130)100:0.23548210033887320702,Cyanobacteria-  
Synechococcus\_elongatus\_PCC\_7942\_81301327:0.16891485040866585643)89:0.13701824623320865704)100:0.54059361907  
757630394)89:0.21267638156179172193)8:0.04411372052441931563,(Bacteria-  
Collinsella\_aerofaciens\_139436881:0.51226521347251330329,(Bacteria-  
Lactococcus\_lactis\_15672681:0.47855039828467332841,Bacteria-  
Lactobacillus\_plantarum\_28376995:0.52431905018944791053)100:0.15613709255962371358)53:0.07927024337980775881)1  
3:0.07743520890489888342)50:0.12804921710306893523)100:0.43289618558426212758,(Bacteria-  
Thermosipho\_melanesiensis\_150019985:0.22127714254375036029,Bacteria-  
Fervidobacterium\_nodosum\_154249003:0.25854061474961687050)94:0.10359575191297025476,Bacteria-  
Thermotoga\_petrophila\_148269177:0.18741728540471236375);

Plantae-Cyanidioschyzon\_merolae\_CMO211C

(((Bacteria-Alkaliphilus\_metallireidgens\_150392425:0.16011133435855798290,(((Bacteria-  
Desulfotobacterium\_hafniense\_109647925:0.34238547066474583902,(Bacteria-  
Caldicellulosiruptor\_saccharolyticus\_146296542:0.44220540040780770275,(((Cyanobacteria-  
Synechococcus\_sp\_RCC307\_148241898:0.26294766638714772711,(((Cyanobacteria-  
Prochlorococcus\_marinus\_str\_NATL1A\_124025652:0.00348741284277507028,Cyanobacteria-  
Prochlorococcus\_marinus\_str\_NATL2A\_72382116:0.01366284719298549270)100:0.41768846951051380456,(Cyanobacteria-  
Prochlorococcus\_marinus\_str\_MIT\_9211\_84518235:0.15587949855640192975,(((Cyanobacteria-  
Prochlorococcus\_marinus\_str\_AS9601\_123968458:0.02159676893156325245,Cyanobacteria-  
Prochlorococcus\_marinus\_str\_MIT\_9301\_126696261:0.00000121823947223981)64:0.02551421479444889936,Cyanobacteria-  
Prochlorococcus\_marinus\_str\_MIT\_9312\_78779248:0.00000121823947223981)100:0.77408127580655283762,Cyanobacteria-  
Prochlorococcus\_marinus\_subsp\_marinus\_str\_CCMP1375\_33240211:0.13861440678646597124)26:0.1763703289113728311  
9)18:0.12293345629326032920)32:0.09829543583279055918,(Cyanobacteria-  
Synechococcus\_sp\_RS9916\_116074639:0.12953512990610518973,(Cyanobacteria-  
Synechococcus\_sp\_CC9311\_113954920:0.11253352815373739160,(((Cyanobacteria-  
Synechococcus\_sp\_BL107\_116070734:0.14011981356333574888,Cyanobacteria-  
Synechococcus\_sp\_CC9605\_78212714:0.04646914808815328507)30:0.01402098769486279442,(Cyanobacteria-

Synechococcus\_sp\_WH\_8102\_33865582:0.14232414310729971096,Cyanobacteria-  
Synechococcus\_sp\_CC9902\_78184860:0.10711466228247666643)36:0.02300624226685270626)80:0.08438337874070170330  
,(Cyanobacteria-Synechococcus\_sp\_RS9917\_87124265:0.09160476561145111662,(Cyanobacteria-  
Synechococcus\_sp\_WH\_7805\_88808447:0.04789640966192963700,Cyanobacteria-  
Synechococcus\_sp\_WH\_7803\_148239421:0.01173541667244351432)75:0.04023051580419601675)89:0.06608095943018631  
180)28:0.03922133340651318828)25:0.03459611960026173078)80:0.11062613862209577653,(Cyanobacteria-  
Prochlorococcus\_marinus\_str\_MIT\_9303\_124023305:0.00982038214515238740,Cyanobacteria-  
Prochlorococcus\_marinus\_str\_MIT\_9313\_33862905:0.01478887761258880669)99:0.18509125458999406422)49:0.042902377  
57816767195)41:0.17083439570618083603)94:0.36469459565012990465,(((Bacteria-  
Thermus\_thermophilus\_55980197:0.61293258489926094601,Bacteria-  
Anaeromyxobacter\_sp\_153003131:0.47209000466988304545)27:0.03836102500839477097,(Bacteria-  
Desulfuromonas\_acetoxidans\_95931032:0.56713590383273293494,(Plantae-  
Ostreococcus\_lucimarinus\_34446:0.82717821809530300836,(((Bacteria-  
Algoriphagus\_sp\_126645751:0.12437902048408934486,Bacteria-  
Flavobacterium\_johnsoniae\_146301237:0.14936567591091581830)91:0.09916949409094409640,Bacteria-  
unidentified\_eubacterium\_149372591:0.18424491498668271738)39:0.04193564553701406572,(Bacteria-  
Psychroflexus\_torquis\_91215704:0.25651098958502382974,(Bacteria-  
Gramella\_forsetii\_120435456:0.14317755129671180803,Bacteria-  
Flavobacteria\_bacterium\_89891453:0.24899258346547673004)49:0.06791006431926535636)35:0.04416028684586571079,(Ba  
cteria-Parabacteroides\_distasonis\_150008694:0.07656820608462885924,Bacteria-  
Bacteroides\_thetaiotaomicron\_29346972:0.27605857194858218762)93:0.15929232059555442635)18:0.0515443774528881598  
6)40:0.04903474694238520865,Bacteria-  
Pedobacter\_sp\_149279619:0.28880940258383436259)52:0.07451424780445185803,Bacteria-  
Cytophaga\_hutchinsonii\_110639170:0.30573262833887904222)85:0.32161911674761334279)39:0.08849953801637923390,(B  
acteria-Acidobacteria\_bacterium\_94967055:0.71244319214981055577,(Bacteria-  
Pelobacter\_propionicus\_118582011:0.23381827694206888668,Bacteria-  
Geobacter\_bemidjiensis\_145617559:0.21902442225116489083)92:0.13764331940164362122)40:0.09616598005810413075)15  
:0.06004554559884989207)15:0.10944432400688089424)11:0.11465229954540066826,(((Bacteria-  
Chromobacterium\_violaceum\_34495972:0.14236027666091455313,Bacteria-  
Neisseria\_meningitidis\_15677847:0.25435884045879358917)91:0.12270406653706109057,(Bacteria-  
Nitrosomonas\_eutropha\_114331598:0.39879805521043637517,(Bacteria-  
Polaromonas\_sp\_91787849:0.38290225435764618789,(Bacteria-  
Ralstonia\_solanacearum\_17546914:0.10504326388289758620,Bacteria-  
Hermineimonas\_arsenicoydans\_134093811:0.19845896493093467816)42:0.02943637679866331971)21:0.0209792094648524  
2952,Bacteria-  
Burkholderia\_mallei\_100263801:0.10933319186442541637)34:0.09493462412273680207)48:0.13562864689846851340)56:0.1  
2824773615490714374,(Bacteria-Legionella\_pneumophila\_148358907:0.53622343725858701013,(Bacteria-  
Beggiatoa\_sp\_153875294:0.35728630594127508413,Bacteria-  
marine\_gamma\_119477458:0.29346671424122700023)77:0.12521636564066437880)93:0.14709201594664902957)99:0.23677  
196485265544768)1:0.03672108604472445331)17:0.08672929715820207330,((Chlamydia-  
Candidatus\_Proteochlamydia\_46447342:0.37173050804871604624,(Chromalveolata-  
Phaeodactylum\_tricornutum\_45238:0.35340635729239672225,Chromalveolata-  
Aureococcus\_anophagefferens\_59907:0.62490666231858993385)92:0.28408597405957386473)93:0.21242593804040860173,P  
lantae-  
Cyanidioschyzon\_merolae\_CMO211C:0.52432946366816490791)97:0.25526931632401500538)24:0.09416678988008989060,(  
Bacteria-Thermotoga\_lettingae\_157364139:0.75094919517465252845,Bacteria-  
Syntrophomonas\_wolfei\_114567973:0.49356317337289590252)15:0.03418533578537009260)28:0.07049598482517585585)35  
:0.09001821388718955763)13:0.07940263875955021200,Bacteria-  
Carboxydotherrus\_hydrogenofomans\_78045158:0.20762070659355921776)10:0.04397554750673934865,(Bacteria-  
Clostridium\_thermocellum\_125974811:0.28225696123357146838,(Bacteria-  
Desulfotomaculum\_reducens\_134301122:0.3587805833358653353,Bacteria-  
Pelotomaculum\_thermopropionicum\_147679192:0.20482507277433806281)49:0.06921036275864422826,(Bacteria-  
Halothermothrix\_oreni\_89210925:0.30546834071385803311,Bacteria-  
Thermosinus\_carboxydvorans\_121533966:0.20125785557839290241)65:0.07826399181468080002)25:0.04594328339597877  
897)12:0.04203906042003188043)17:0.06216908043181513382,(Bacteria-  
Staphylococcus\_haemolyticus\_70725024:0.28039006943027167118,(((Bacteria-  
Lactococcus\_lactis\_30024073:0.41689118693469484622,(Bacteria-  
Oenococcus\_oeni\_118587245:0.37417259262775076634,(Bacteria-  
Streptococcus\_thermophilus\_116628680:0.13171740688573263522,Bacteria-  
Leuconostoc\_mesenteroides\_116619018:0.12217308954985908742)96:0.10554892549002442559)35:0.0559391565097751078  
4,(Bacteria-Lactobacillus\_delbrueckii\_104773351:0.16570197412363310563,Bacteria-  
Pediococcus\_pentosaceus\_116493557:0.15328607866499133205)42:0.04205821741534690461)37:0.03264191840913173437)5



2:0.12871033787830282735,Bacteria-  
Listeria\_monocytogenes\_153165323:0.09923058749693522418)26:0.06436507651185681411,Bacteria-  
Bacillus\_pumilus\_157694418:0.07774096991336482132)30:0.06700660801893863761)23:0.10325124386295690682)25:0.044  
87221353285297809)59:0.05711412075930479698,Bacteria-  
Ruminococcus\_obeum\_153812746:0.25495283135036195254)36:0.02919858421285811273,(Bacteria-  
Dorea\_longicatena\_153853186:0.08452707072257709120,Bacteria-  
Bifidobacterium\_adolescentis\_119025480:0.19929856685874250410)37:0.03852162626054670552,Bacteria-  
Eubacterium\_ventriosum\_154483673:0.14930700791711035147);

#### Plantae-Cyanidioschyzon\_merolae\_CM313C

((Bacteria-Sagittula\_stellata\_126729314:0.09875640091427689837,(Bacteria-  
Silicibacter\_sp.\_99080410:0.05531968267835998820,Bacteria-  
Roseobacter\_sp.\_126738727:0.06449492615587248956)100:0.06409821871367760160)99:0.07430575491570107216,(((Bacteri  
a-Granulibacter\_bethesdensis\_114327031:0.31029437427399086946,(Bacteria-  
Salinibacter\_ruber\_83814939:0.44180148808848890285,(Bacteria-  
delta\_proteobacterium\_94263231:0.42593515243740293075,Bacteria-  
Syntrophobacter\_fumaroxidans\_116747980:0.35685419778308435923)93:0.11879243137987315071)97:0.11566284227561304  
809,(Bacteria-Helicobacter\_pylori\_15611489:0.83059154280799540881,(Bacteria-  
Petrogla\_mobilis\_145622188:0.77911598956587213571,(Bacteria-  
Psychrobacter\_sp.\_148653878:1.34959908086905366886,(((Bacteria-  
Borrelia\_burgdorferi\_15594593:0.60654422560176712853,Bacteria-  
Treponema\_denticola\_42528139:0.56283336979189702021)54:0.10548138738745099774,(((Bacteria-  
Anaeromyxobacter\_dehalogenans\_86158477:0.99651278667891229901,(((Bacteria-  
Bacillus\_subtilis\_16078219:0.20251538634617063939,Bacteria-  
Geobacillus\_thermodenitrificans\_138894374:0.13595890916035524576)76:0.06311948347505652590,Bacteria-  
Staphylococcus\_haemolyticus\_70726958:0.48055702746560274852)88:0.07827305222354996594,(Bacteria-  
Listeria\_monocytogenes\_153175453:0.26401972675792434453,(Bacteria-  
Streptococcus\_pneumoniae\_148992885:0.15550993971661636328,Bacteria-  
Lactococcus\_lactis\_125624692:0.30138655199381775285)100:0.29512156344867157554,(((Bacteria-  
Pediococcus\_pentosaceus\_116493361:0.86027398281548173031,Bacteria-  
Oenococcus\_oeni\_116491177:0.32357486393308920736)59:0.08951046426521337696,Bacteria-  
Leuconostoc\_mesenteroides\_116617560:0.32425473992573022874)66:0.07336901250195182467,Bacteria-  
Lactobacillus\_plantarum\_28378823:0.39589080340636134681)33:0.05794209391990419455)100:0.14347117545742626987)8  
9:0.09376892329475179644)94:0.12025061193907360391,(Bacteria-  
Eubacterium\_ventriosum\_154484570:0.36203124095156363760,Bacteria-  
Bacteroides\_capillosus\_154496475:0.45051529097446696426)95:0.16183762955461231114,(Bacteria-  
Thermosinus\_carboxydvorans\_121535192:0.44044959921107551537,(((Bacteria-  
Desulfotomaculum\_reducens\_134300296:0.54428240482408152268,Bacteria-  
Desulfitobacterium\_hafniense\_89894637:0.36456349934851106642)20:0.03237183314890552943,(Bacteria-  
Syntrophomonas\_wolfei\_114567434:0.35370341894143375594,(Bacteria-  
Thermoanaerobacter\_ethanolicus\_114845101:0.26354205013318776629,Bacteria-  
Clostridium\_thermocellum\_125974937:0.27756633299400085280)51:0.05127004459203819697)37:0.05469459810143258160)  
28:0.03145615157225715997,Bacteria-  
Halothermothrix\_oreni\_89209725:0.33905056150238038759)19:0.02036081698999543318)49:0.03486199748686655969)72:0  
.06768098149295932731)31:0.05711904316060973513,(((Bacteria-  
Chloroflexus\_aggregans\_118045798:0.29327620808907806094,Bacteria-  
Roseiflexus\_sp.\_148655405:0.22238344773390492093)99:0.15871526358651219524,(Bacteria-  
Deinococcus\_geothermalis\_94985188:1.01350464515492033613,Bacteria-  
Herpetosiphon\_aurantiacus\_113939858:0.42508863861132129003)42:0.08947335961459633447)53:0.12331198391902693789,  
Bacteria-  
Symbiobacterium\_thermophilum\_51891875:0.25401313363519362198)37:0.08799426514281584455)15:0.0473907706664969  
3276)16:0.07307484735596110614,Bacteria-  
Alkaliphilus\_metalliredigens\_150391496:0.50803203521113771135)40:0.08272986893230142857,(Plantae-  
Cyanidioschyzon\_merolae\_CM313C:0.48609834524497125274,(Plantae-  
Porphyra\_zeoensis\_AU188724\_1:0.68396300510337326717,(Chlamydia-  
Candidatus\_Protochlamydia\_46446812:0.42677413565085509095,(((Chlamydia-  
Chlamydophila\_pneumoniae\_33241472:0.00000121823947223981,Chlamydia-  
Chlamydophila\_pneumoniae\_15618060:0.00000121823947223981)27:0.00000121823947223981,Chlamydia-  
Chlamydophila\_pneumoniae\_15835671:0.00000121823947223981)15:0.00000121823947223981,Chlamydia-  
Chlamydophila\_pneumoniae\_16752907:0.00000121823947223981)100:0.15604204885248038059,((Chlamydia-  
Chlamydophila\_felis\_89898174:0.06151249573918710772,(Chlamydia-  
Chlamydophila\_abortus\_62185225:0.08542347200831854059,Chlamydia-

Chlamydomydia\_caviae\_29840399:0.04939893807188608377)99:0.05484670629533869995)100:0.09662203645327899215,(Chlamydia-Chlamydia\_muridarum\_15835007:0.04685053050286965698,(Chlamydia-Chlamydia\_trachomatis\_76788827:0.00371715201284112578,Chlamydia-Chlamydia\_trachomatis\_15604831:0.00576264968194992698)100:0.08825675130318515194)100:0.21899523853347188651)83:0.08201432699132746307)100:0.49493658916110955248)58:0.07802662702904668290)25:0.03759120008003925123)61:0.14915794694026304756)54:0.13439907046991045325)30:0.06651481483214967405,Bacteria-Mycoplasma\_capricolum\_83319855:1.27932760406907330974)56:0.13227039240112656304)100:0.55076001533050877867)84:0.17791341203760852041,(Bacteria-Thermus\_thermophilus\_46199470:0.67481512790503861421,(Bacteria-Pelobacter\_propionicus\_118579806:0.38348528598248277088,Bacteria-Geobacter\_metallireducens\_78222509:0.19804070196801065729)100:0.37080396076459731791)87:0.11406204823762801370)74:0.10861130750161955560)99:0.09709506390150415833)100:0.39054439447078775904)100:0.12252332922364828072,(Bacteria-Parvibaculum\_lavamentivorans\_154252499:0.22508774178880514016,(Bacteria-Stappia\_aggregata\_118588384:0.23645328189050585088,(Bacteria-Sinorhizobium\_medicae\_150397882:0.11698836808679199950,(Bacteria-Rhizobium\_leguminosarum\_116253806:0.08366520937235608080,Bacteria-Agrobacterium\_tumefaciens\_17937470:0.09653377748110909817)95:0.05460383163854092697)100:0.1315651459754518248)8)99:0.08534463000432271351)99:0.09071101393640473853)100:0.21288255495592753319,(Bacteria-Paracoccus\_denitrificans\_119384569:0.17270411400703553073,Bacteria-Rhodobacter\_sphaeroides\_146277609:0.11281443061204574074)81:0.03786287543596083410)62:0.02773060022259357660,Bacteria-Oceanicola\_granulosus\_89070420:0.12160970667222667507);

Plantae-Oryza\_sativa\_115438861  
(((Chromalveolata-Emiliania\_huxleyi\_UI-EH-IJ0-abt-n-11-0-UI.sl\_6:0.23047447664383410859,(Plantae-Physcomitrella\_patens\_140664:0.02510167706613995048,Plantae-Physcomitrella\_patens\_196617:0.03937882086530785503)100:0.13161882115260878368,(Plantae-Arabidopsis\_thaliana\_15220099:0.03633138319337018279,Plantae-Arabidopsis\_thaliana\_15218214:0.03759808791518301496)100:0.16054541206434394529,(Plantae-Oryza\_sativa\_115444955:0.10520507061220525646,Plantae-Oryza\_sativa\_115438861:0.07235542107288762959)100:0.07360655384795977696)99:0.08070197677895336874)100:0.11246192990200001849,(Plantae-Chlamydomonas\_reinhardtii\_188027:0.60706545823268909245,(Plantae-Volvox\_carteri\_79605\_jgi:0.02751830574544889690,Plantae-Chlamydomonas\_reinhardtii\_195230:0.03064408364440703719)100:0.14723808151102366071)73:0.10138763192405389479)98:0.15418658924048336822,(Plantae-Chlamydomonas\_reinhardtii\_115246:0.23721849602259090228,Plantae-Volvox\_carteri\_89266\_jgi:0.15712927260768996818)100:0.72623847456782064658,(Plantae-Ostreococcus\_lucimarinus\_2522:0.07484343232009735281,Plantae-Ostreococcus\_tauri\_24503:0.11944858495866868264)100:0.6952071336433097672)100:0.66281010400739415189,(Chlamydia-Candidatus\_Proteochlamydia\_46445875:0.43205993724195596029,(Chlamydia-Candidatus\_Proteochlamydia\_46445874:0.41262106058993525126,(Chlamydia-Candidatus\_Proteochlamydia\_46446977:1.33066800497786985602,(Chlamydia-Chlamydia\_muridarum\_15835396:0.14228083741485542113,(Chlamydia-Chlamydia\_trachomatis\_76789232:0.00000121823947223981,Chlamydia-Chlamydia\_trachomatis\_15605223:0.00000121823947223981)100:0.08840374243529418308)100:0.24375810850095402937,(Chlamydia-Chlamydomydia\_abortus\_62184770:0.04130185571638444325,(Chlamydia-Chlamydomydia\_felis\_89898687:0.11645769769931092752,Chlamydia-Chlamydomydia\_caviae\_29839894:0.02797599771027259319)74:0.02254506666869851919)95:0.08749796740704897380,(Chlamydia-Chlamydomydia\_pneumoniae\_15618524:0.00000121823947223981,Chlamydia-Chlamydomydia\_pneumoniae\_16752426:0.00000121823947223981)21:0.00000121823947223981,Chlamydia-Chlamydomydia\_pneumoniae\_33241969:0.00000121823947223981)21:0.00000121823947223981,Chlamydia-Chlamydomydia\_pneumoniae\_15836146:0.00000121823947223981)100:0.17097429511661627055)82:0.0693365705459209752)4)100:0.75737344764938407948)58:0.13769011855403465172)61:0.09663761345211796527)97:0.26471770030979352439)63:0.11389391366327271393,Chlamydia-Candidatus\_Proteochlamydia\_46445884:0.32104912368399474154)21:0.05417297868706313219,(Chlamydia-Chlamydia\_trachomatis\_76788778:0.00409350316437316012,Chlamydia-Chlamydia\_trachomatis\_15604784:0.00000121823947223981)100:0.01520013300026723004,Chlamydia-Chlamydia\_muridarum\_15834955:0.02253969283366556720)100:0.07223361776511226517,(Chlamydia-Chlamydomydia\_felis\_89898380:0.04582876383242573404,(Chlamydia-Chlamydomydia\_abortus\_62185050:0.02026952478092169593,Chlamydia-Chlamydomydia\_caviae\_29840197:0.01540499926200294446)98:0.03722087180702916137)97:0.04345721492223079269,(Chlamydia-Chlamydomydia\_pneumoniae\_15835884:0.00201447081706041062,(Chlamydia-Chlamydomydia\_pneumoniae\_15618266:0.00000121823947223981,Chlamydia-Chlamydomydia\_pneumoniae\_33241692:0.00000121823947223981)40:0.00000121823947223981,Chlamydia-Chlamydomydia\_pneumoniae\_16752690:0.00000121823947223981)60:0.00000121823947223981)100:0.1317072127891931177

0)54:0.05426092173968377619)100:0.28186568744895734717)34:0.05490038257173490699,((Chromalveolata-  
Thalassiosira\_pseudonana\_25177:1.05642639474183308579,(Chromalveolata-  
Phaeodactylum\_tricornutum\_11615:0.15388176241357928720,Chromalveolata-  
Thalassiosira\_pseudonana\_9045:0.30989513674205493299)100:0.52837950759014329360)100:0.39190386786453640378,((Ba  
cteria-Orientia\_tsutsugamushi\_148284316:0.38310941384333457860,Bacteria-  
Rickettsia\_bellii\_157826528:0.27032246624782257927)100:0.41081347251992927916,Bacteria-  
Lawsonia\_intracellularis\_94986452:0.66312243019526861953)100:0.20157235930296837911)76:0.09898199743431317088)95  
:0.19993246569471120888)61:0.06790442189931639172,Plantae-  
Glaucocystis\_nostochinearum\_Contig953\_3:0.33496349324974500350)47:0.04371767975286375979)31:0.0746748153267146  
8858,((Plantae-Porphyras\_zezoensis\_Contig1958\_1:0.22113323445235028020,Plantae-  
Gracilaria\_changii\_120459344\_1:0.28444416922683490867)69:0.07334718390212209560,((Plantae-  
Galdieria\_sulphuraria\_HET\_12D10\_2:0.37241535572500050755,((Plantae-  
Porphyra\_zezoensis\_Contig1219\_3:0.43782171857972268514,Plantae-  
Cyanidioschyzon\_merolae\_CMI040C:0.18261184801349383822)26:0.00560019816958707596)16:0.00399076128583467776,P  
lantae-  
Galdieria\_sulphuraria\_HET\_38E05\_1:0.20270386334174386733)52:0.08505492033999483004)36:0.06111064436651941767)4  
7:0.08411117606973374239,(Excavata-Euglena\_gracilis\_Contig2104\_2:0.24360180320882615645,Chromalveolata-  
Aureococcus\_anophagefferens\_27252:0.40246033105123357743)58:0.09724568416473272636)99:0.15879662947800185502,C  
hromalveolata-Phaeodactylum\_tricornutum\_49533:0.22502553471482278358,Chromalveolata-  
Thalassiosira\_pseudonana\_36429:0.14583568106563904454);

Plantae-Oryza\_sativa\_115452347

((Plantae-Arabidopsis\_thaliana\_15226817:0.08871496284263542809,((Plantae-  
Arabidopsis\_thaliana\_30694529:0.00000121823947223981,Plantae-  
Arabidopsis\_thaliana\_18410591:0.00000121823947223981)29:0.00000121823947223981,Plantae-  
Arabidopsis\_thaliana\_30694526:0.00000121823947223981)100:0.12198439455420173605)100:0.30881007330819687517,(((P  
lantae-Oryza\_sativa\_115438550:0.46287557917256993978,((Plantae-  
Arabidopsis\_thaliana\_42572443:0.00000121823947223981,Plantae-  
Arabidopsis\_thaliana\_15232459:0.00000121823947223981)100:0.48362869181231726845)98:0.23792449794267844787,((Plan  
tae-Physcomitrella\_patens\_46799:0.11803969040486304853,Plantae-  
Physcomitrella\_patens\_44234:0.00922220511361430267)99:0.41248635631238234067,((((Plantae-  
Oryza\_sativa\_115448765:1.27325821758301405140,((Plantae-  
Arabidopsis\_thaliana\_18411885:0.00000121823947223981,Plantae-  
Arabidopsis\_thaliana\_42572157:0.10635215512468224053)99:0.37370912741604278562,Plantae-  
Arabidopsis\_thaliana\_18395106:0.23308085192513683381)88:0.34965275794778710727)37:0.18508472559920777223,(((Plan  
tae-Oryza\_sativa\_115441383:0.28270134432996196772,((Plantae-  
Arabidopsis\_thaliana\_18395177:0.06505637343108161552,((Plantae-  
Arabidopsis\_thaliana\_42571597:0.05534878506854476465,Plantae-  
Arabidopsis\_thaliana\_42571595:0.06802518344024294228)52:0.02292271712897111721)100:0.64116461192044404971,((Plant  
ae-Arabidopsis\_thaliana\_42571735:0.00000121823947223981,Plantae-  
Arabidopsis\_thaliana\_42562492:0.01225853217848552404)99:0.69458111042279180314)41:0.25847053203630310225)34:0.2  
3918466726422149549,(Plantae-Arabidopsis\_thaliana\_15226439:1.13535777149765926275,Plantae-  
Oryza\_sativa\_115442349:0.64709125427474201153)32:0.16396013984117122075)15:0.20212056725055979611,(((Plantae-  
Arabidopsis\_thaliana\_18394923:0.13121019064098576878,Plantae-  
Arabidopsis\_thaliana\_22330665:0.18650182647164317840)58:0.13415099756755685667,((Plantae-  
Oryza\_sativa\_115469006:0.57639345166008504329,Plantae-  
Oryza\_sativa\_115448273:0.35602942726762415449)46:0.11986238016440194099)48:0.22353394401833076577,((Plantae-  
Physcomitrella\_patens\_17452:0.00000121823947223981,((Plantae-  
Physcomitrella\_patens\_19427:0.01398158940077614230,((Plantae-  
Arabidopsis\_thaliana\_79315018:0.00000121823947223981,Plantae-  
Arabidopsis\_thaliana\_15232579:0.03713110608739571966)100:0.91825675664149397637,Plantae-  
Oryza\_sativa\_115452347:0.52302215609760038806)97:0.43287319527206125080)50:0.10884362939804749504)55:0.2010132  
7512763744743)14:0.18564401274813166487)14:0.14498470545916095076)77:0.45967741618736335241,((Plantae-  
Arabidopsis\_thaliana\_15238805:0.85821039419788147651,Plantae-  
Arabidopsis\_thaliana\_15238826:0.93778079273122572079)93:1.05914585599396726678,(((Opisthokonta-  
Danio\_rerio\_125851554:0.02980189131636820990,Opisthokonta-  
Danio\_rerio\_35902819:0.17659353712169906236)97:0.57993429407839980350,Opisthokonta-  
Danio\_rerio\_47086303:0.53108928281152267825)33:0.11638999889645408603,(Opisthokonta-  
Danio\_rerio\_90093320:0.50533955704532662612,Opisthokonta-  
Apis\_mellifera\_66517026:0.74602879066100524774)33:0.08879067449667261969)99:0.75195923742586523453)19:0.155680  
83216125708224)40:0.35375201509016718227,Plantae-  
Arabidopsis\_thaliana\_15231350:1.93575901510326642274)81:0.64768853521033042941,(((Opisthokonta-

Danio\_riero\_113673508:0.18546320578394076550,((Opisthokonta-  
Mus\_musculus\_94388214:0.02638418185370853750,Opisthokonta-  
Mus\_musculus\_94388216:0.00000121823947223981)53:0.02418739691030184075,((Opisthokonta-  
Mus\_musculus\_82957134:0.03435727126657848324,((Opisthokonta-  
Mus\_musculus\_82957130:0.01836434252966131705,Opisthokonta-  
Mus\_musculus\_94383817:0.00000121823947223981)100:0.16742226031647447493,Opisthokonta-  
Mus\_musculus\_82918359:0.01127177657403180197)38:0.01021801430391905061)9:0.01071116074347117607,Opisthokonta-  
Mus\_musculus\_94400771:0.00610558640163008908)15:0.00051387157079053111)89:0.05422716230551461597,(((Opisthoko  
nta-Mus\_musculus\_94388212:0.02469933371499502539,(Opisthokonta-  
Mus\_musculus\_94371445:0.00000121823947223981,(Opisthokonta-  
Mus\_musculus\_94383812:0.00000121823947223981,(Opisthokonta-  
Mus\_musculus\_82957137:0.01846133652712166756,Opisthokonta-  
Mus\_musculus\_82918361:0.00000121823947223981)48:0.00638074935114063373)25:0.00612910137401890230)16:0.000001  
21823947223981)79:0.01252126100144676860,Opisthokonta-  
Mus\_musculus\_94371441:0.00000121823947223981)90:0.04865890719009709209,((Opisthokonta-  
Mus\_musculus\_94400769:0.00000121823947223981,(Opisthokonta-  
Mus\_musculus\_94400767:0.00000121823947223981,Opisthokonta-  
Mus\_musculus\_94400765:0.00000121823947223981)38:0.00000121823947223981)90:0.01231623497945024716,((((Opisthok  
onta-Mus\_musculus\_94388210:0.01850498581802377182,(Opisthokonta-  
Mus\_musculus\_94398611:0.00000121823947223981,Opisthokonta-  
Mus\_musculus\_51769129:0.00000121823947223981)98:0.01226463351323901427)26:0.00000121823947223981,Opisthokonta  
-Mus\_musculus\_31559916:0.00000121823947223981)0:0.00000121823947223981,(Opisthokonta-  
Mus\_musculus\_94371439:0.00000121823947223981,(Opisthokonta-  
Mus\_musculus\_37674277:0.00000121823947223981,Opisthokonta-  
Mus\_musculus\_94371443:0.00000121823947223981)11:0.00000121823947223981)0:0.00000121823947223981)0:0.00000121  
823947223981,Opisthokonta-  
Mus\_musculus\_82801284:0.00000121823947223981)13:0.00000121823947223981,(Opisthokonta-  
Mus\_musculus\_82918363:0.00000121823947223981,Opisthokonta-  
Mus\_musculus\_82918357:0.00613626106404713354)72:0.00612056572175310749)42:0.00000121823947223981)46:0.013198  
41820039201891)20:0.01605043283049284800)95:0.13848056993028581840)100:0.53272472014100646920,(((Opisthokonta-  
Apis\_mellifera\_110762180:0.38218200216233916278,((Opisthokonta-  
Drosophila\_melanogaster\_24582366:0.00000121823947223981,Opisthokonta-  
Drosophila\_melanogaster\_24582368:0.00000121823947223981)33:0.00000121823947223981,Opisthokonta-  
Drosophila\_melanogaster\_17136728:0.00000121823947223981)100:0.39385911240002347000)100:0.43305163772485699702,  
(Opisthokonta-Mus\_musculus\_18875324:0.00000121823947223981,(Opisthokonta-  
Danio\_riero\_125828935:0.47640126914017877358,Opisthokonta-  
Danio\_riero\_125828898:0.50018201641506709887)100:1.04541006518286594407)100:0.73082402826222969683)94:0.369637  
03298930811192,(((Opisthokonta-Danio\_riero\_125826898:0.10568739970639355608,Opisthokonta-  
Mus\_musculus\_6671602:0.33070424535859760384)92:0.09337352721694769375,(Opisthokonta-  
Mus\_musculus\_7710036:0.08552802186750134428,Opisthokonta-  
Danio\_riero\_47087353:0.18416181120430030749)100:0.28442964486475896813)96:0.07701179411001930764,((Opisthokonta  
-Danio\_riero\_67972636:0.11188913859113763793,Opisthokonta-  
Danio\_riero\_47086935:0.24582123271215433613)43:0.02370811608050448285,Opisthokonta-  
Mus\_musculus\_6754222:0.26085578372181994489)48:0.09654706824292320910)100:0.70288456455500991638,(Opisthokont  
a-Schizosaccharomyces\_pombe\_19111886:0.93061157915029124599,((Opisthokonta-  
Drosophila\_melanogaster\_17864096:0.05468827384392714597,Opisthokonta-  
Drosophila\_melanogaster\_28571891:0.00000121823947223981)100:0.71577666838440723307,((Opisthokonta-  
Mus\_musculus\_17157989:0.07234153821099742476,((Opisthokonta-  
Danio\_riero\_68380500:0.03199038236941911806,Opisthokonta-  
Danio\_riero\_41056104:0.00000121823947223981)81:0.07685722310364519194,((Opisthokonta-  
Danio\_riero\_47086453:0.00000121823947223981,Opisthokonta-  
Danio\_riero\_125828089:1.03847281524669132757)95:0.08348304246139412466,Opisthokonta-  
Mus\_musculus\_6678940:0.37751099009845728860)48:0.04432733343792558123)46:0.04775214300950151453)72:0.1215822  
8226047158860,Opisthokonta-  
Drosophila\_melanogaster\_62484464:0.41059631209698010945)85:0.22387340103706379613)96:0.27845479592838073835)41  
:0.06762430789925967523)28:0.12954833726741254996)32:0.14036127183705671140)64:0.08655009133723511050,(((Planta  
e-Cyanidioschyzon\_merolae\_CMR392C:1.84924695365251667845,(((Plantae-  
Physcomitrella\_patens\_115524:0.00000121823947223981,Plantae-  
Physcomitrella\_patens\_115456:0.00000121823947223981)100:0.04386176968298083345,(Plantae-  
Physcomitrella\_patens\_113207:0.18885889129457530955,Plantae-  
Physcomitrella\_patens\_139747:0.07048846463509099436)68:0.05213726536921092780)99:0.51612264717051703489,(Plantae  
-Arabidopsis\_thaliana\_15220810:0.65292537488481383612,Plantae-

Oryza\_sativa\_115445085:0.31307631591272788718)60:0.13127979695197936061)76:0.19650601865545186397)19:0.03798743835980054190,((Plantae-Oryza\_sativa\_115482462:0.37857669263342874633,(Plantae-Arabidopsis\_thaliana\_22328624:0.23422224359206372801,Plantae-Arabidopsis\_thaliana\_15226106:0.28373465698878957975)71:0.12641479973883559818)94:0.18446778308215663889,(((Plantae-Arabidopsis\_thaliana\_42573682:0.00000121823947223981,Plantae-Arabidopsis\_thaliana\_18423760:0.00000121823947223981)32:0.00000121823947223981,Plantae-Arabidopsis\_thaliana\_30696616:0.00000121823947223981)100:0.12425411146604761758,(Plantae-Arabidopsis\_thaliana\_18416794:0.03758129734856704290,Plantae-Arabidopsis\_thaliana\_79325275:0.13592695655859313164)98:0.11703459560943997586)99:0.21304567519273970300,(((Plantae-Arabidopsis\_thaliana\_18422817:0.00000121823947223981,Plantae-Arabidopsis\_thaliana\_30695248:0.00000121823947223981)100:0.41799235142394775000,(Plantae-Arabidopsis\_thaliana\_18398061:0.00000121823947223981,Plantae-Arabidopsis\_thaliana\_30680456:0.00000121823947223981)100:0.24438539421519214767)18:0.04186507117616029838,(Plantae-Oryza\_sativa\_115473043:0.35926494308039308434,Plantae-Oryza\_sativa\_115486383:0.15439089346409037851)42:0.06180950857604069343)27:0.08312880870732244909)62:0.11463973536204256909,((Plantae-Physcomitrella\_patens\_119381:0.00000121823947223981,Plantae-Physcomitrella\_patens\_119432:0.00000121823947223981)100:0.06220510430466007906,Plantae-Physcomitrella\_patens\_19879:0.00000121823947223981)100:1.10880609335487423373)57:0.13419902421695412142)63:0.19606597267271452800)14:0.08425208929294016047,Chromalveolata-Phytophthora\_sojae\_133840:0.58131387030202785748)42:0.04318400827880421827)88:0.36297606803003640286,(((Plantae-Physcomitrella\_patens\_19797:0.30475519142882651069,(Plantae-Oryza\_sativa\_115489714:0.33338752783636660393,(Plantae-Arabidopsis\_thaliana\_15235002:0.01452149470785730687,Plantae-Arabidopsis\_thaliana\_30692258:0.04738503792282666022)93:0.10347924030437280485,(Plantae-Arabidopsis\_thaliana\_30692254:0.06748049826844781940,Plantae-Arabidopsis\_thaliana\_30692256:0.00000121823947223981)78:0.04523785713191716407)100:0.21860187538514400107)56:0.17813005148787222631)38:0.12717860576631218050,(Plantae-Physcomitrella\_patens\_118845:0.37258555558135791896,Plantae-Arabidopsis\_thaliana\_15231557:1.43312770535005662431)89:0.22369897072280961470)94:0.32723600048699813536,((Plantae-Arabidopsis\_thaliana\_30682622:0.00000121823947223981,Plantae-Arabidopsis\_thaliana\_15236359:0.00000121823947223981)100:0.42191383313324187787,((Amoebozoa-Acanthamoeba\_castellanii\_Contig272\_3:1.28409210584016642009,Plantae-Glaucocystis\_nostochinearum\_Contig208\_2:1.03022202150932318254)66:0.63942629872180856143,(Plantae-Arabidopsis\_thaliana\_15221187:0.73010506819226161923,(Plantae-Oryza\_sativa\_115473215:1.07529535933197872843,Plantae-Oryza\_sativa\_115488680:0.19436564029646499763)67:0.25824601511149386512)62:0.20894750972913397891)4:0.00000121823947223981,((Plantae-Arabidopsis\_thaliana\_15229525:0.00000121823947223981,Plantae-Arabidopsis\_thaliana\_30687226:0.00000121823947223981)100:0.38417308976645209162,Plantae-Oryza\_sativa\_115441831:0.72864049650707862771)10:0.08571753990857734762,(Plantae-Physcomitrella\_patens\_208328:0.61738219278582040506,Plantae-Physcomitrella\_patens\_37877:0.57049312051470557616)88:0.44730857868152285040)9:0.11302062620923720992)17:0.10723554245530877993)16:0.11487063685296840243)57:0.32653823543865079237,(Chlamydia-Candidatus\_Proteochlamydia\_46446527:1.73281370359313036111,Plantae-Physcomitrella\_patens\_228226:1.58489720616420592947)68:0.40561494164297073883,(Excavata-Malawimonas\_jakobiformis\_Contig1132\_3:1.84187636714956082251,Plantae-Porphyr\_a\_yezoensis\_Contig824\_2:1.38289456049889003530)57:0.32369566069105781825)7:0.17530107898999894300)80:0.46671048137059123473)79:0.35513829776414829187)55:0.51129419010054155681,(Plantae-Physcomitrella\_patens\_8989:0.00000121823947223981,Plantae-Physcomitrella\_patens\_44443:0.08579957083343298097)100:0.26080783985188005225)45:0.21643213293932725416)16:0.05557768829139853040)39:0.28795879953191233502,Plantae-Oryza\_sativa\_115460844:0.70183059329811348093)30:0.22094279660103297025,(Plantae-Arabidopsis\_thaliana\_30681615:0.00000121823947223981,Plantae-Arabidopsis\_thaliana\_18399877:0.00000121823947223981)100:1.89369357097448487437)86:0.05374086624744971868,Plantae-Oryza\_sativa\_115435828:0.35898776957963013379);

Plantae-Oryza\_sativa\_115460026

(Chlamydia-Candidatus\_Proteochlamydia\_46447393:0.78822149303898536576,(((Chromalveolata-Aureococcus\_anophagefferens\_59136:0.29871843293187966273,Chromalveolata-Phaeodactylum\_tricornutum\_15852:0.36266127921881013974)100:0.29426638483818501335,(Chromalveolata-Alexandrium\_tamarense\_Contig43\_6:0.43248677020223269540,(((Opisthokonta-Mus\_musculus\_8393066:0.16202440118942573744,Opisthokonta-Danio\_rerio\_125821778:0.15487010655483884891)71:0.13884250039346157646,(((Opisthokonta-

Saccharomyces\_cerevisiae\_6323681:0.90538199512116734891,Opisthokonta-  
Magnaporthe\_grisea\_39939918:0.34635488149270249325)78:0.21976876321067304043,(Plantae-  
Cyanophora\_paradoxa\_CP\_aaw\_i17\_6:0.00000121823947223981,Plantae-  
Cyanophora\_paradoxa\_CP\_aar\_m06\_6:0.00000121823947223981)100:0.54839677805237019292)100:0.433534088604869416  
45,((Plantae-Physcomitrella\_patens\_37064:0.64816170836250031062,(Plantae-  
Oryza\_sativa\_115460026:0.20130746145170352879,((Plantae-  
Physcomitrella\_patens\_204256:0.04749619798042505753,Plantae-  
Physcomitrella\_patens\_154825:0.07744291358249806578)100:0.34495003491281905905,((Plantae-  
Arabidopsis\_thaliana\_79317821:0.00000121823947223981,Plantae-  
Arabidopsis\_thaliana\_18391404:0.00000121823947223981)26:0.00000121823947223981,Plantae-  
Arabidopsis\_thaliana\_79317794:0.00000121823947223981)100:0.17783885195725127049)95:0.09414615791006121504)93:0.  
19251243899174702578)92:0.19899969481657253656,(Plantae-  
Ostreococcus\_lucimarinus\_5907:0.17703616408160888218,Plantae-  
Ostreococcus\_tauri\_37994:0.53120516342137169552)99:0.38426649405797008718)72:0.13926441230035263574)93:0.273278  
64945334517932)56:0.06949785289300761115,(Opisthokonta-  
Apis\_mellifera\_110776824:0.35165248399846227301,Opisthokonta-  
Drosophila\_melanogaster\_24652342:0.33429343980617842735)56:0.10594267648772591472)100:0.48547833607106893883)3  
6:0.06146652548560953278)31:0.11755407222632564823,((Plantae-  
Physcomitrella\_patens\_176592:0.09736285669221975136,Plantae-  
Physcomitrella\_patens\_162557:0.08049757175458470415)97:0.12025172661635682991,((Plantae-  
Cyanophora\_paradoxa\_Contig1919\_6:0.41643275510497951286,Plantae-  
Oryza\_sativa\_115453035:0.10522366058406303069)30:0.06737818762171222942,Plantae-  
Arabidopsis\_thaliana\_15223944:0.17621884872605211858)31:0.09199167346092515518)33:0.13046005757493076005,((Plant  
ae-Ostreococcus\_tauri\_22592:0.05990146714630699420,Plantae-  
Ostreococcus\_lucimarinus\_28559:0.06755136136905699751)99:0.22810012668443474526,((Plantae-  
Arabidopsis\_thaliana\_18401659:0.04025943731863500935,Plantae-  
Oryza\_sativa\_115477837:0.07859994989661880926)95:0.12300790278584931847,(Plantae-  
Physcomitrella\_patens\_63006:0.00708296836881524162,Plantae-  
Physcomitrella\_patens\_85183:0.02237370251872236593)87:0.08554617899262730030)92:0.11629429210499139802)90:0.127  
20769739636783591)56:0.15725695810200365776)33:0.10434207804143109943,Amoebozoa-  
Acanthamoeba\_castellanii\_Contig405\_3:0.31320801677883108871)25:0.07241561224412659814,Plantae-  
Glaucozystis\_nostochinearum\_Contig554\_2:0.32689024382027653814);

Plantae-Oryza\_sativa\_115463187

((Cyanobacteria-Synechococcus\_sp.\_RCC307\_148241893:0.39244421335794216210,(((Cyanobacteria-  
Prochlorococcus\_marinus\_str.\_MIT\_9515\_123966418:0.04199189717745591827,(Cyanobacteria-  
Prochlorococcus\_marinus\_subsp.\_pastoris\_str.\_CCMP1986\_33861650:0.07801596512250348614,(Cyanobacteria-  
Prochlorococcus\_marinus\_str.\_AS9601\_123968733:0.03005126059024704199,(Cyanobacteria-  
Prochlorococcus\_marinus\_str.\_MIT\_9301\_126696539:0.04749142780554165000,Cyanobacteria-  
Prochlorococcus\_marinus\_str.\_MIT\_9312\_78779488:0.02939140185121569271)57:0.01431387012727610222)100:0.19579978  
853480611845)26:0.02886209180664987481)100:0.66912042659423531799,(Cyanobacteria-  
Prochlorococcus\_marinus\_str.\_NATL2A\_72382493:0.01109260382765148503,Cyanobacteria-  
Prochlorococcus\_marinus\_str.\_NATL1A\_124026192:0.01338448629752304712)100:0.36077881153582302964)29:0.17421788  
190215620196,(Cyanobacteria-Prochlorococcus\_marinus\_str.\_MIT\_9211\_84517841:0.26088558069350548108,Cyanobacteria-  
Prochlorococcus\_marinus\_subsp.\_marinus\_str.\_CCMP1375\_33240551:0.37389193419538552243)56:0.0391001069390305225  
3)18:0.10444997183018484010,(Cyanobacteria-  
Prochlorococcus\_marinus\_str.\_MIT\_9303\_124022704:0.02738009930418877635,Cyanobacteria-  
Prochlorococcus\_marinus\_str.\_MIT\_9313\_33863326:0.01639141562587607959)100:0.30224951255425652752)37:0.16759864  
775709998330,((Cyanobacteria-Synechococcus\_sp.\_WH\_7805\_88808907:0.05647917608321376126,Cyanobacteria-  
Synechococcus\_sp.\_WH\_7803\_148239865:0.06800683869133990200)100:0.18551099511057089764,((Cyanobacteria-  
Synechococcus\_sp.\_CC9311\_113953749:0.29802810877124286115,(Cyanobacteria-  
Synechococcus\_sp.\_WH\_8102\_33865466:0.12746007499219977332,((Cyanobacteria-  
Synechococcus\_sp.\_BL107\_116072462:0.06470748885826323182,Cyanobacteria-  
Synechococcus\_sp.\_CC9902\_78184968:0.08487786700366398152)100:0.12873078117376954288,Cyanobacteria-  
Synechococcus\_sp.\_CC9605\_78213160:0.12874823269826901617)46:0.01078587971714741779)87:0.06504476323539405691  
71:0.04965747455297725432,(Cyanobacteria-  
Synechococcus\_sp.\_RS9917\_87124746:0.22032713141487580977,Cyanobacteria-  
Synechococcus\_sp.\_RS9916\_116073039:0.15211194630887786561)90:0.06304648686361989662)65:0.0524761646303435400  
1)84:0.08686911340191072473)25:0.06592538671367657865)39:0.12465501941510484518,((Chromalveolata-  
Thalassiosira\_pseudonana\_268136:0.88238859657180235274,Chromalveolata-  
Phaeodactylum\_tricornutum\_26565:0.74214375662802589684)82:0.32918642075670689895,((((Bacteria-  
Brucella\_ovis\_148558612:0.22018060342174616828,Bacteria-

Bartonella\_bacilliformis\_121602233:0.32164868059868612082)97:0.17437898017030059594,(Bacteria-  
Agrobacterium\_tumefaciens\_15890494:0.13704736704618381005,(Bacteria-  
Sinorhizobium\_medicae\_150397980:0.14423756785019498095,Bacteria-  
Rhizobium\_etli\_86359228:0.10337979244520358046)82:0.05247748575795290610)99:0.12583291807883803526)56:0.066162  
54438241279956,(Bacteria-Maricaulis\_maris\_114570227:0.43241941725818716646,(((Bacteria-  
Novosphingobium\_aromaticivorans\_146275644:0.22616324346754257402,Bacteria-  
Sphingomonas\_wittichii\_148556561:0.21095585984322734463)42:0.10470403949251910758,Bacteria-  
Caulobacter\_crescentus\_16125312:0.31627364327239698705)67:0.08376883913203950205,Bacteria-  
Erythrobacter\_litoralis\_85374502:0.20711553721376738113)83:0.07535793214152161634,((Bacteria-  
Paracoccus\_denitrificans\_119383602:0.15826888088521412490,Bacteria-  
Dinoroseobacter\_shibae\_118735313:0.18741732310671291306)56:0.04852384557617404892,((Bacteria-  
Oceanicola\_granulosus\_89069926:0.22808876670688935095,(Bacteria-  
Sagittula\_stellata\_126730032:0.11535819475781181054,(Bacteria-  
Roseovarius\_sp.\_149200958:0.12367574137084848263,(Bacteria-  
Silicibacter\_sp.\_99078405:0.11965498463167710541,Bacteria-  
Roseobacter\_sp.\_126740971:0.10380659214442396199)100:0.13143071681282375573)38:0.02023108633407772611)85:0.052  
944791940632771105)48:0.04660142881872744725,Bacteria-  
Rhodobacterales\_bacterium\_126724596:0.29156476877113535195)22:0.01499344044084153019)100:0.1501426843704718738  
8)78:0.08245268599327816583)47:0.06398751372381611402)17:0.02758593040473476463,(Bacteria-  
Acidovorax\_avenae\_120611219:0.46845608897405666138,(Bacteria-  
Rhodoferrax\_ferrireducens\_89900746:0.23626130273001316739,Bacteria-  
Polaromonas\_sp.\_91788797:0.18273708663280441300)86:0.08923641673042775890)92:0.17812956696431714310)24:0.05312  
910417115626616,(((Bacteria-Candidatus\_Pelagibacter\_91763202:0.88830155643768016205,(Chromalveolata-  
Phytophthora\_sojae\_138769:1.11974374607640791979,(Plantae-  
Physcomitrella\_patens\_14245:1.19862203602285588566,Chlamydia-  
Chlamydomonada\_felis\_89898803:0.94087286936588232500)100:0.74059813951522857067,Chromalveolata-  
Phytophthora\_sojae\_156743:2.09272068596494476012)77:0.33500878448215765104)43:0.14580816775506177940)13:0.1704  
0733861877563338,((Plantae-Arabidopsis\_thaliana\_18405495:0.16306491233331207868,Plantae-  
Oryza\_sativa\_115463187:0.09428201284814177741)98:0.12933034951554264746,(Plantae-  
Physcomitrella\_patens\_23028:0.17339526522140880083,Plantae-  
Physcomitrella\_patens\_149438:0.07196372596768679797)100:0.14784217314047135017)100:0.47445497688776028244,Bacte-  
ria-  
Methylophilales\_bacterium\_118594988:0.38378484422208014593)9:0.01788872390898912576)0:0.07984910007031048584,((  
Bacteria-Fulvimarina\_pelagi\_114706561:0.29699978953987571373,Bacteria-  
Aurantimonas\_sp.\_90420453:0.30192655707297555434)100:0.47079226642010413295,(((Cyanobacteria-  
Anabaena\_variabilis\_ATCC\_29413\_75909037:0.02549617248317801593,Cyanobacteria-  
Nostoc\_sp.\_PCC\_7120\_17227880:0.01828760117083517989)100:0.10425518804940911433,(Cyanobacteria-  
Nodularia\_spumigena\_CCY9414\_119512665:0.12029538496139993708,Cyanobacteria-  
Nostoc\_punctiforme\_PCC\_73102\_23126099:0.13797994838666621797)93:0.04962665219996909710)95:0.0923456053666410  
0650,(((Cyanobacteria-Synechococcus\_elongatus\_PCC\_7942\_81300701:0.00000121823947223981,Cyanobacteria-  
Synechococcus\_elongatus\_PCC\_6301\_56752212:0.00000121823947223981)100:0.75638472488573282870,Cyanobacteria-  
Synechocystis\_sp.\_PCC\_6803\_16331326:0.43794891041598682513)44:0.25034762504729002330,(Cyanobacteria-  
Cyanosphaera\_sp.\_CCY0110\_126660557:0.04671551285180221280,Cyanobacteria-  
Crocospaera\_watsonii\_WH\_8501\_67920027:0.17522728074372667662)100:0.18162511129774169816)15:0.05649396453794  
499479)16:0.13573940771867365473)4:0.04339531848235149425)2:0.03155263637869933080,((Bacteria-  
Pseudomonas\_stutzeri\_146282054:0.14206663909587841088,Bacteria-  
Chromohalobacter\_salexigens\_92112223:0.12738327964841644757)99:0.16064565989770690502,((Bacteria-  
Limnobacter\_sp.\_149928068:0.35026789313149053751,((Bacteria-  
Francisella\_tularensis\_110670639:0.21674906766994606055,(((Bacteria-  
Oceanospirillum\_sp.\_89095287:0.18131807603682870145,(Bacteria-  
Psychrobacter\_cryohalolentis\_93005241:0.27520224711570295817,(Bacteria-  
Moritella\_sp.\_149909254:0.01650672629820057816,Bacteria-  
Psychromonas\_sp.\_90408848:0.08592411017966775089)100:0.13379587429197509207)66:0.06653398085090732328)29:0.02  
476945703394052220,(Bacteria-Shewanella\_loihica\_127512709:0.13962624599696121797,(Bacteria-  
Marinomonas\_sp.\_152996554:0.11910540955361630100,Bacteria-  
Alteromonadales\_bacterium\_119471951:0.19285566969506803825)12:0.01465207914705830838)53:0.0494629195208504401  
9)33:0.03586629190086929042,(Bacteria-Hahella\_chejuensis\_83643417:0.18580490499086060874,((Bacteria-  
alpha\_proteobacterium\_114772438:0.13049494449757023662,Bacteria-  
Pseudoalteromonas\_atlantica\_109897289:0.09411434624028604257)99:0.11300465123725175753,(Bacteria-  
Vibrio\_cholerae\_121590743:0.16504156455824176009,(Bacteria-  
Photobacterium\_profundum\_90413309:0.11592643093599343251,Bacteria-  
Vibrionales\_bacterium\_148975250:0.08647686675800081435)75:0.04306735238647844966)85:0.05490693033501362758)75:

0.05136112821773113069)23:0.01343586764076101780)23:0.02991926535237659709,((Bacteria-marine\_gamma\_119476504:0.22390454899774397957,Bacteria-Oceanobacter\_sp.\_94499154:0.10896463502474014462)62:0.04158972469073236172,(Bacteria-Marinobacter\_aquaeolei\_120555922:0.19863253840034414410,Bacteria-Alcanivorax\_borkumensis\_110834114:0.28347241535797773615)17:0.05403143191414891411)20:0.03611290822755493929)3:0.01920177433755913474)75:0.10883824307955254629,Bacteria-Saccharophagus\_degradans\_90020959:0.17278288321552678908)27:0.02298807423072613682)19:0.06144318227813677646,Bacteria-Methylobacillus\_flagellatus\_91776671:0.22000059206450800486)4:0.02800489934038208339)13:0.07205663255747929430)3:0.06472361068184327715)1:0.04766413206371511446,(Bacteria-Deinococcus\_radiodurans\_15806120:0.36056852507098158256,Bacteria-Acinetobacter\_baumannii\_126642739:0.33025295043378999349)92:0.26588764355910898818)29:0.12324045731173732809)28:0.10774076427219232699,Cyanobacteria-Synechococcus\_sp.\_WH\_5701\_87303426:0.42631268716390302576);

Plantae-Oryza\_sativa\_115470767

((((Bacteria-Thermus\_thermophilus\_55981108:0.67174961713697178833,(((Cyanobacteria-Crocospaera\_watsonii\_WH\_8501\_67921975:0.18891335094025052399,Cyanobacteria-Nostoc\_sp.\_PCC\_7120\_17231888:0.00271010936252192181,Cyanobacteria-Anabaena\_variabilis\_ATCC\_29413\_75909486:0.00231102126622733306)100:0.17145229299238248788)100:0.55734948403041795206,(Bacteria-Carboxydotherrmus\_hydrogenoformans\_78044607:0.34249151985222608952,(Bacteria-Symbiobacterium\_thermophilum\_51892669:0.36833028827791858273,(Bacteria-Thermoanaerobacter\_ethanolicus\_114843672:0.25358063124653662523,(Bacteria-Clostridium\_difficile\_126698917:0.30708742564980595624,Bacteria-Alkaliphilus\_metaliredigens\_150388828:0.37557834851459859227)98:0.09233096500903718862)84:0.07399274143251892422,(Bacteria-Bacillus\_amyloliquefaciens\_154686086:0.17676188922002858406,(Bacteria-Staphylococcus\_haemolyticus\_70726640:0.35823558506526176348,Bacteria-Listeria\_welshimeri\_116872762:0.22779866511461710488)89:0.06863100155405069125)100:0.18241891703705739869,Bacteria-Halothermothrix\_orenii\_89209752:0.41338364684234091273)29:0.03969266790695510222)46:0.04981403974332196394)16:0.02485269622217069554)90:0.08490979690019735682)81:0.06130744275021392242,Bacteria-Roseiflexus\_castenholzii\_156743526:0.52610553535019100035)70:0.05942522155750567386)95:0.11885033496695750210,(((Plantae-Oryza\_sativa\_115470767:0.14381111842233954001,Plantae-Arabidopsis\_thaliana\_30678905:0.21055066878864081570)100:0.44467059973466865896,((Chromalveolata-Phaeodactylum\_tricornutum\_20608:0.28950054351117882057,Chromalveolata-Thalassiosira\_pseudonana\_268644:0.23695385034379690126)100:0.50897450935737253985,(Plantae-Ostreococcus\_lucimarinus\_34347:0.12333550667612915019,Plantae-Ostreococcus\_tauri\_8234:0.10836589540456373348)100:0.69724497109939298500)46:0.07165117216698098368)65:0.07713463146438666318,(Plantae-Cyanidioschyzon\_merolae\_CMH146C:0.79394139927205820140,(Chlamydia-Candidatus\_Protoclamydia\_46446277:0.34409854758790670015,(Chlamydia-Chlamydia\_muridarum\_15834850:0.03402197604718684709,(Chlamydia-Chlamydia\_trachomatis\_76789587:0.00475302746983388008,Chlamydia-Chlamydia\_trachomatis\_15605577:0.00159380734999843327)100:0.06686720577882356020)100:0.17219505510398067094,((Chlamydia-Chlamydophila\_pneumoniae\_15618907:0.00000121823947223981,(Chlamydia-Chlamydophila\_pneumoniae\_16752027:0.00000121823947223981,Chlamydia-Chlamydophila\_pneumoniae\_15836530:0.00000121823947223981)35:0.00000121823947223981)72:0.00160959260776999619,Chlamydia-Chlamydophila\_pneumoniae\_33242368:0.00000121823947223981)100:0.20223000578081035128,(Chlamydia-Chlamydophila\_felis\_89898059:0.02699215918218582713,(Chlamydia-Chlamydophila\_caviae\_29840519:0.04932852983216146764,Chlamydia-Chlamydophila\_abortus\_62185343:0.04795694025095856988)49:0.01187614918527076999)100:0.12990980154160189364)100:0.09576295811393453761)100:0.31019662105429418597)98:0.12730940471836102446)66:0.07682732181167699348)100:0.29069426035207468484)47:0.05030305280196544632,(Bacteria-Treponema\_denticola\_42526551:0.71164048078437036615,Bacteria-Anaeromyxobacter\_dehalogenans\_86157534:0.51394550026910557072)51:0.09651091753414334229)31:0.02329686188900648852,(Bacteria-Magnetococcus\_sp.\_117926996:0.43719467044967436076,(((Bacteria-Novosphingobium\_aromaticivorans\_87200495:0.11568392502383499643,(Bacteria-Sphingomonas\_wittichii\_148556711:0.12401506349918139938,Bacteria-Sphingopyxis\_alaskensis\_103486036:0.08563566314462769946)51:0.05192686815385648413)100:0.29228674287188816105,(Bacteria-Rhodobacter\_sphaeroides\_126463534:0.08124477034851775026,Bacteria-Paracoccus\_denitrificans\_119385483:0.09804481509643002413)100:0.22838625223940792197,(Bacteria-Acidiphilium\_cryptum\_148259386:0.33886220792983146044,(Bacteria-Parvibaculum\_lavamentivorans\_154254063:0.21392924546487751547,(Bacteria-Xanthobacter\_autotrophicus\_154244245:0.14309470685512121202,(Bacteria-



Methylobacterium\_chloromethanicum\_156448768:0.15941126887952794533,(Bacteria-  
Nitrobacter\_hamburgensis\_92115668:0.05281834908797536365,(Bacteria-  
Rhodospseudomonas\_palustris\_91974709:0.05387696479011178097,Bacteria-  
Bradyrhizobium\_japonicum\_27375890:0.03109584381018016749)75:0.02672600107922738083)100:0.1568128919194186066  
1)79:0.04069576261666615902,(((Bacteria-Fulvamarina\_pelagi\_114705224:0.08526932789697382054,Bacteria-  
Aurantimonas\_sp.\_90420519:0.07438287007046809340)100:0.04783900841539606708,(((Bacteria-  
Bartonella\_bacilliformis\_121602640:0.22004836909318456484,(Bacteria-  
Brucella\_ovis\_148559480:0.03843896640821546640,Bacteria-  
Ochrobactrum\_anthropi\_153008079:0.03087249935424353497)99:0.03427087231444421456)17:0.01146480919353291307,Ba  
cteria-Mesorhizobium\_sp.\_110636259:0.09376562794161261150)36:0.02534746034388667482,((Bacteria-  
Agrobacterium\_tumefaciens\_15887437:0.03917423230772128229,Bacteria-  
Rhizobium\_leguminosarum\_116249886:0.04635385024939367438)100:0.02994818031949327691,Bacteria-  
Sinorhizobium\_medicae\_150398632:0.05371926103561236454)100:0.06149979092004122933)40:0.01912918477848045071)1  
00:0.07324247236804311278,Bacteria-  
Stappia\_aggregata\_118590504:0.17496964576920123746)80:0.03089598365958282772)31:0.03231310267089725075)96:0.056  
24641866497724629)80:0.05984157770127314369)41:0.04565750976704874287)58:0.05072118323987200722)100:0.1468906  
4699656337321,(((Bacteria-Ralstonia\_eutropha\_113867066:0.08662440385849115576,Bacteria-  
Polynucleobacter\_sp.\_145589238:0.17079739555845338539)100:0.06990484168931654363,Bacteria-  
Burkholderia\_xenovorans\_91782608:0.12483355233616848234)99:0.06418904977246314703,(Bacteria-  
Bordetella\_bronchiseptica\_33602856:0.17595390039765454460,(Bacteria-  
Janthinobacterium\_sp.\_152979779:0.02769440118316077171,Bacteria-  
Hermiinimonas\_arsenicoydans\_134095034:0.03044805177290103859)100:0.13525158834986000800)82:0.046272288042795  
74781)100:0.19297824375016978116,((Bacteria-Haemophilus\_influenzae\_16272192:0.31039810449413768323,Bacteria-  
Saccharophagus\_degradans\_90022349:0.35232715573761697048)82:0.08621208270993339917,(((Bacteria-  
Beggiatoa\_sp.\_153864819:0.23058200659297697910,Bacteria-  
Methylococcus\_capsulatus\_53804618:0.21898176902127827748)88:0.07492474283450119288,Bacteria-  
Nitrosococcus\_oceani\_77165581:0.32099362700688882644)27:0.03239416980347233771,(Bacteria-  
Alkalilimnicola\_ehrlichei\_114321093:0.13810596221230123093,Bacteria-  
Halorhodospira\_halophila\_121998524:0.17932035781500807459)100:0.10260699430067353466)51:0.06250173075197637540  
)43:0.05272540869886695875)99:0.13595782797316427470)49:0.05536259919244219951)100:0.15063595882464506093,Bac  
teria-Chlorobium\_chlorochromatii\_78189646:0.69198522741288603921);

Plantae-Oryza\_sativa\_115474235

(Bacteria-Frankia\_alni\_111222491:0.71990046672226171154,(((Bacteria-  
Carboxydotherrus\_hydrogeniformans\_78043171:0.35450921029975734911,(Bacteria-  
Pelotomaculum\_thermopropionicum\_147677725:0.30897499942282780072,Bacteria-  
Desulfotomaculum\_reducens\_134299650:0.24571193084714018640)92:0.12101913597897122343)97:0.2367093740213372654  
6,(((Plantae-Ostreococcus\_tauri\_9971:0.38050263556420260702,Plantae-  
Ostreococcus\_lucimarinus\_29883:0.22135231442772396182)100:1.92407384803687997454,((Chlamydia-  
Candidatus\_Protoclamydia\_46446032:0.56417122709910638712,(Plantae-  
Physcomitrella\_patens\_109660:0.36185574454241747899,(Plantae-  
Oryza\_sativa\_115474235:0.19714897014951313081,(Plantae-  
Arabidopsis\_thaliana\_18398265:0.00000121823947223981,Plantae-  
Arabidopsis\_thaliana\_42572325:0.00000121823947223981)26:0.00000121823947223981,Plantae-  
Arabidopsis\_thaliana\_42572327:0.00000121823947223981)100:0.18076874981241183860)93:0.09595113721435770404)98:0.  
26575582121379892619)100:0.84303349660788073905,(Bacteria-  
Syntrophus\_aciditrophicus\_85858828:0.53726308711829451337,Bacteria-  
Cytophaga\_hutchinsonii\_110637336:0.79315249824066624829)86:0.18794587191143169447)74:0.20935521567721529501)10  
:0.08608680056445651430,(((Chlamydia-Chlamydophila\_pneumoniae\_15618814:0.00000121823947223981,Chlamydia-  
Chlamydophila\_pneumoniae\_16752131:0.00000121823947223981)23:0.00000121823947223981,Chlamydia-  
Chlamydophila\_pneumoniae\_15836438:0.00000121823947223981)47:0.00000121823947223981,Chlamydia-  
Chlamydophila\_pneumoniae\_33242268:0.00267920730169324576)100:1.09101629868527316702,(Bacteria-  
Tropheryma\_whipplei\_28493472:1.02123757931467551430,(Plantae-  
Volvox\_carteri\_108127\_jgi:2.40853115292260433478,(((Bacteria-  
Thermobifida\_fusca\_72161037:0.32978238038913165742,Bacteria-  
Nocardioides\_sp.\_119717515:0.27377165209926157541)40:0.04874445391408709083,Bacteria-  
Acidothermus\_cellulolyticus\_117928793:0.41337950981116389215)53:0.06802100528980573046,((Bacteria-  
Mycobacterium\_vanbaalenii\_120403135:0.22242658172355087021,Bacteria-  
Corynebacterium\_glutamicum\_145295462:0.50913942192415262422)96:0.14870259711255950918,Bacteria-  
Salinispora\_tropica\_145593823:0.27561028344484589381)86:0.08938854494089125413)77:0.17044358171369503041,(Bacteri  
a-Clavibacter\_michiganensis\_148272526:0.45570465838107854228,Bacteria-  
Bifidobacterium\_adolescentis\_119025204:0.47969881195616215219)30:0.10028938805806615620)58:0.207650653650517158

51,((((Bacteria-Prosthecochloris\_vibrioformis\_145219530:0.28772431884572041705,Bacteria-Chlorobium\_phaeobacteroides\_119357463:0.27481354710628669302)100:0.41047391321989479263,((Bacteria-Lactococcus\_lactis\_116511200:0.22681982111407336666,Bacteria-Streptococcus\_mutans\_24379077:0.19818422806538910086)100:0.56917203412140937591,(Bacteria-Geobacillus\_thermodenitrificans\_138893874:0.44805496944470496468,(Bacteria-Herpetosiphon\_aurantiacus\_113941000:0.36175979172480993151,(((Cyanobacteria-Prochlorococcus\_marinus\_subsp.\_marinus\_str.\_CCMP1375\_33240829:0.26370560176891250093,Cyanobacteria-Prochlorococcus\_marinus\_str.\_MIT\_9211\_84517578:0.28974264828026358165)32:0.09392032476517098161,(Cyanobacteria-Synechococcus\_sp.\_RS9916\_116073344:0.19065321322631195722,(Cyanobacteria-Prochlorococcus\_marinus\_str.\_MIT\_9303\_124023693:0.18852085636274143465,(Cyanobacteria-Synechococcus\_sp.\_WH\_5701\_87302973:0.25315393589468848656,Cyanobacteria-Synechococcus\_sp.\_WH\_8102\_33866175:0.22212323852872867258)81:0.08724634575919967827)49:0.04036257187869030788)86:0.19060952419500945543)58:0.16817843191182654805,Cyanobacteria-Prochlorococcus\_marinus\_str.\_AS9601\_123969037:0.63868239189870967820)100:0.31543999013799028930,Bacteria-Microscilla\_marina\_124009981:0.69053198838009455240)29:0.07822056853786421571)15:0.06111224182197464577)13:0.09597651646781155121)12:0.03618855295382991666)6:0.05312537980383272990,(Bacteria-Alkaliphilus\_metalliredigens\_150392272:0.29026018374210138528,Bacteria-Clostridium\_sp.\_106893883:0.24766938243772573802)100:0.22836768285748837437)6:0.05062596114926629781,((((Bacteria-Pseudomonas\_fluorescens\_70732508:0.20482963280834812214,(((Bacteria-Candidatus\_Blochmannia\_33519925:0.58863854815030780543,Bacteria-Baumannia\_cicadellinicola\_94676718:0.18996046361957322213)85:0.09748189642098098462,(Bacteria-Serratia\_proteamaculans\_157369610:0.06669753303444196646,Bacteria-Yersinia\_enterocolitica\_123443414:0.12977813658999565183)80:0.04016554531299375980)47:0.01378677541307849093,(Bacteria-Enterobacter\_sakazakii\_156935075:0.06415668421025043366,(Bacteria-Salmonella\_enterica\_16759358:0.03111657679711026664,(Bacteria-Escherichia\_coli\_124528906:0.00000121823947223981,Bacteria-Shigella\_dysenteriae\_82775721:0.00747079010115343691)100:0.04877949164472526050,Bacteria-Citrobacter\_koseri\_157147020:0.02417027846735252464)40:0.01882459698269554546)99:0.05254645531745543580,Bacteria-Klebsiella\_pneumoniae\_152968896:0.04542203296190773509)100:0.09143886521754557295)94:0.06827895831173694252)75:0.04334428386192125393)82:0.04449676350638968880,(Bacteria-Chromobacterium\_violaceum\_34497927:0.20561355127697900080,(Bacteria-Stenotrophomonas\_maltophilia\_119876202:0.11446856299960968262,Bacteria-Xanthomonas\_campestris\_78045802:0.15427853916521475086)100:0.11224800875132286138)74:0.05257043565382341077)99:0.22775715794277331949,(Bacteria-Bdellovibrio\_bacteriovorus\_42522180:0.47553228821131809934,Bacteria-Lactobacillus\_brevis\_116333877:0.62315294622161654381)66:0.10995351331596911471)32:0.04178467310371975635,(Bacteria-Aeromonas\_hydrophila\_117619780:1.24389760769666235518,Bacteria-Coxiella\_burnetii\_153208936:0.45667009066124614192)36:0.14372798583083915003)22:0.10989179661608967919,Bacteria-Legionella\_pneumophila\_148358653:0.80631211867369279034)29:0.15680052545907038897)3:0.02181610241610616036,(Bacteria-Treponema\_denticola\_42527886:0.54207849162427634848,Bacteria-Borrelia\_afzelii\_111115023:0.86606840896194614565)40:0.15838532992939580168)1:0.03848846901308733415)3:0.05664504790218485158,(Bacteria-Desulfotobacterium\_hafniense\_109647094:0.13061834858431853323,Bacteria-Streptomyces\_coelicolor\_21222011:0.15132127431762237846)100:0.83819238011948093980)10:0.03234267204154604725)5:0.07075719540306157906)9:0.03153479266740121661)35:0.13268209391708454814)27:0.05819610231788893695,Bacteria-Bacillus\_cereus\_30020677:0.93911575409545489102)45:0.13399850136100463494)56:0.18873018810014033364,Bacteria-Feravidobacterium\_nodosum\_154250263:0.68822770474256700357)97:0.50424479552219647616,Bacteria-Propionibacterium\_acnes\_50843773:0.57511524275823600050);

Plantae-Oryza\_sativa\_115476574

(Chromalveolata-Thalassiosira\_pseudonana\_18741:0.00000121823947223981,((Chromalveolata-Phytophthora\_sojae\_138165:0.39438456482963807348,(Chlamydia-Candidatus\_Protoclamydia\_46447472:0.58663934484741031561,(Excavata-Naegleria\_gruberi\_3696-gwl.17.131.1:0.56192861117724213216,(Bacteria-Mycoplasma\_genitalium\_12045126:2.61641875628180686775,(((Chlamydia-Chlamydophila\_pneumoniae\_33241975:0.00000121823947223981,Chlamydia-Chlamydophila\_pneumoniae\_15836150:0.00000121823947223981)22:0.00000121823947223981,(Chlamydia-Chlamydophila\_pneumoniae\_15618528:0.00000121823947223981,Chlamydia-Chlamydophila\_pneumoniae\_16752422:0.00000121823947223981)28:0.00000121823947223981)100:0.25716486548789668776,((Chlamydia-Chlamydia\_muridarum\_15835400:0.09487732348593913567,(Chlamydia-Chlamydia\_trachomatis\_15605228:0.00000121823947223981,Chlamydia-Chlamydia\_trachomatis\_76789236:0.00000121823947223981)100:0.21093646716412628450)98:0.33131377763597658070,(Chlamydia-Chlamydophila\_caviae\_29839890:0.05007631492247521798,(Chlamydia-

Chlamydomonada abortus\_62184766:0.07082435995534572259,Chlamydia-  
Chlamydomonada felis\_89898691:0.10163685826509374910)61:0.01828698835725073996)89:0.18589736233036860402)29:0.05  
978850433960048588)70:0.28048077542819249697)82:0.26388013272451099622)76:0.21333048516382666082)52:0.1082138  
6500981333700,(Chromalveolata-Aureococcus\_anophagefferens\_25163:0.89687064732822319169,((Plantae-  
Physcomitrella\_patens\_196421:0.26059966160191466722,((Amoebozoa-  
Acanthamoeba\_castellanii\_EC100974\_1:0.59214594166194467473,(Plantae-  
Ostreococcus\_tauri\_19448:0.43078898013915478682,Plantae-  
Ostreococcus\_lucimarinus\_34954:0.23864978112004087141)99:0.55520633782489103858)59:0.26539210657187478626,(Plant  
ae-Volvox\_carteri\_103956\_jgi:0.14814790956195025839,Plantae-  
Chlamydomonas\_reinhardtii\_116449:0.19813030870117062654)100:0.40577408996129654684)25:0.17611095826970224465)  
18:0.08391804515321076019,(Plantae-Arabidopsis\_thaliana\_15228560:0.29509303153010746357,Plantae-  
Oryza\_sativa\_115476574:0.40078700356398183624)48:0.15436985445888101731)9:0.07924764511816116686)39:0.09939978  
399215429472)31:0.07253417213292533139)100:0.37226413155113935449,Chromalveolata-  
Phaeodactylum\_tricornutum\_12459:0.49603932214760959596)100:0.34120870679042369922,Chromalveolata-  
Thalassiosira\_pseudonana\_36995:0.00000121823947223981);

Plantae-Oryza\_sativa\_115483650

((Plantae-Oryza\_sativa\_115483650:0.17588687136955932777,((Plantae-  
Volvox\_carteri\_81121\_jgi:0.07150385539209132280,Plantae-  
Chlamydomonas\_reinhardtii\_130292:0.10981883837095350598)100:0.42578019785021120613,(((Chromalveolata-  
Plasmodium\_falciparum\_124513124:1.16300291785902532027,(((Chlamydia-  
Chlamydomonada felis\_89898011:0.04427992865052023802,Chlamydia-  
Chlamydomonada abortus\_62185386:0.04383372055034895354)80:0.02450328418793887991,Chlamydia-  
Chlamydomonada caviae\_29840568:0.03324615520311596101)100:0.12296038705614797948,((Chlamydia-  
Chlamydomonada pneumoniae\_15618865:0.00000121823947223981,Chlamydia-  
Chlamydomonada pneumoniae\_15836491:0.00000121823947223981)27:0.00000121823947223981,Chlamydia-  
Chlamydomonada pneumoniae\_33242326:0.00000121823947223981)16:0.00000121823947223981,Chlamydia-  
Chlamydomonada pneumoniae\_16752074:0.00000121823947223981)100:0.15079405828794806288)94:0.0659278040257992858  
9,((Chromalveolata-Emiliania\_huxleyi\_Contig713\_4:5.11295226738724384319,(Chlamydia-  
Chlamydia\_trachomatis\_15605541:0.00299713203145520043,Chlamydia-  
Chlamydia\_trachomatis\_76789550:0.00000121823947223981)99:0.00000121823947223981)16:0.06490251567342009142,Chla  
mydia-  
Chlamydia\_muridarum\_15834812:0.02447246182372898177)16:0.11679461042829521189)20:0.34597337933284844080)10:0.  
19084477475576722139,(Chromalveolata-Aureococcus\_anophagefferens\_3183:0.64848742269031556251,(Chromalveolata-  
Phaeodactylum\_tricornutum\_3262:0.28145628265308147986,Chromalveolata-  
Thalassiosira\_pseudonana\_263714:0.22350776130134741848)97:0.41755133267170413403)23:0.09742855396757832409,Chla  
mydia-  
Candidatus\_Proteochlamydia\_46446952:0.48284171105267847945)29:0.06619194118988205866)50:0.13793402065230170317,  
(Plantae-Gracilaria\_changii\_120462693\_4:0.46297052090093471222,Plantae-  
Cyanidioschyzon\_merolae\_CMJ027C:0.51997274318420239059)95:0.29077336162873373970)96:0.17697534546161303171,(  
Plantae-Ostreococcus\_lucimarinus\_30035:0.19062594011099556757,Plantae-  
Ostreococcus\_tauri\_15515:0.2244242775927412115)99:0.49246147161474757015)95:0.18287085808564265688)97:0.244888  
44601977916016,Plantae-  
Physcomitrella\_patens\_216994:0.35301044851518176282)100:0.15824981223074108261)100:0.21622227155734660697,Plant  
ae-Arabidopsis\_thaliana\_15222600:0.00000121823947223981,Plantae-  
Arabidopsis\_thaliana\_30692655:0.00000121823947223981);

Plantae-Ostreococcus\_lucimarinus\_31465

((Chlamydia-Chlamydia\_muridarum\_15834836:0.09339975341008771581,(((Plantae-  
Cyanidioschyzon\_merolae\_CML043C:0.97731558116961736449,((Plantae-  
Arabidopsis\_thaliana\_15217683:0.76799590534159478672,Plantae-  
Arabidopsis\_thaliana\_15222150:1.25642629122455984358)69:0.21978149666746757407,Plantae-  
Physcomitrella\_patens\_162062:0.71225743852059297812)68:0.33466603831060698360,Plantae-  
Oryza\_sativa\_115461911:0.92118814268906090703)67:0.42492432280352360197)100:2.32461450772293254374,(((Chlamydia-  
Chlamydomonada pneumoniae\_15836517:0.00000121823947223981,Chlamydia-  
Chlamydomonada pneumoniae\_16752041:0.00000121823947223981)25:0.00000121823947223981,Chlamydia-  
Chlamydomonada pneumoniae\_33242354:0.00000121823947223981)25:0.00000121823947223981,Chlamydia-  
Chlamydomonada pneumoniae\_15618894:0.00000121823947223981)99:0.20453946719844337543)33:0.18261785207692052269  
,((Chlamydia-Chlamydomonada abortus\_62185355:0.12505578731910019230,Chlamydia-  
Chlamydomonada caviae\_29840532:0.06521437744445113260)57:0.05225892072518905501,Chlamydia-  
Chlamydomonada felis\_89898046:0.11928205227070079464)50:0.09928023483904174773)24:0.05636796131469919841,((Chro  
malveolata-Phaeodactylum\_tricornutum\_43446:1.09295055296153886815,(Plantae-

Ostreococcus\_tauri\_32641:0.29000985979903426415,Plantae-  
Ostreococcus\_lucimarinus\_31465:0.19760702602810564787)100:0.81049112324942762520)85:0.35940735347168834002,Plan  
tae-  
Ostreococcus\_tauri\_33167:1.01811423507933018762)92:0.81753838258854361065)100:0.18015244543780792319)100:0.0947  
8160204123786681,Chlamydia-Chlamydia\_trachomatis\_76789574:0.00000121823947223981,Chlamydia-  
Chlamydia\_trachomatis\_15605564:0.00000121823947223981);

Plantae-Ostreococcus\_tauri\_18978

((((Cyanobacteria-Gloeobacter\_violaceus\_PCC\_7421\_37520371:0.39293393018078770496,Cyanobacteria-  
Thermosynechococcus\_elongatus\_BP-1\_22297624:0.21871993868222217028)26:0.04390937062054067058,(((Cyanobacteria-  
Trichodesmium\_erythraeum\_IMS101\_113476080:0.17326183463666922080,Cyanobacteria-  
Lyngbya\_sp.\_PCC\_8106\_119484717:0.10713516362069719356)95:0.09347766161114749728,(((Cyanobacteria-  
Cyanosphaera\_watsonii\_WH\_8501\_67920270:0.04011016438438030907)100:0.17817427350480091741,Cyanobacteria-  
Synechocystis\_sp.\_PCC\_6803\_16331965:0.18165399794023515123)90:0.09211556709952632704,(Cyanobacteria-  
Synechococcus\_elongatus\_PCC\_6301\_56751072:0.00000121823947223981,Cyanobacteria-  
Synechococcus\_elongatus\_PCC\_7942\_81299266:0.00000121823947223981)100:0.15860280264215811941)17:0.03734676744  
522014841,Cyanobacteria-  
Anabaena\_variabilis\_ATCC\_29413\_75909959:0.14731720936539341449)19:0.03950699004556953303)35:0.06297662772290  
188449,(((Bacteria-Anaeromyxobacter\_dehalogenans\_86157853:0.33843396977434714312,Bacteria-  
Myxococcus\_xanthus\_108761817:0.58625660561410630756)100:0.47194172015364066475,(((Chromalveolata-  
Aureococcus\_anophagefferens\_21140:0.34851573869769270075,(Plantae-  
Cyanidioschyzon\_merolae\_CMM013C:0.29392545294687200119,(Plantae-  
Ostreococcus\_lucimarinus\_42734:0.20349312785880546706,Plantae-  
Ostreococcus\_tauri\_18978:0.13942506132701648625)100:0.35863875891117247274)39:0.05891824141299967926)56:0.07540  
320163837810341,(Chromalveolata-Thalassiosira\_pseudonana\_36917:0.21580010177660025050,(Chromalveolata-  
Thalassiosira\_pseudonana\_1283:0.31254645019767707259,Chromalveolata-  
Phaeodactylum\_tricornutum\_24792:0.21087052382065149536)70:0.079265503422709033075)100:0.12741441402948339157)88  
:0.10207062167783192974,(Chlamydia-Candidatus\_Protochlamydia\_46446428:0.33042461993420368938,(Chlamydia-  
Chlamydia\_muridarum\_15835083:0.13667034986616721781,(((Chlamydia-  
Chlamydophila\_pneumoniae\_33241558:0.00000121823947223981,Chlamydia-  
Chlamydophila\_pneumoniae\_15618143:0.00000121823947223981)7:0.00000121823947223981,Chlamydia-  
Chlamydophila\_pneumoniae\_15835754:0.00000121823947223981)25:0.00000121823947223981,Chlamydia-  
Chlamydophila\_pneumoniae\_16752821:0.00000121823947223981)100:0.17315041365893862890,(Chlamydia-  
Chlamydophila\_caviae\_29840339:0.03429658998681517357,(Chlamydia-  
Chlamydophila\_abortus\_62185176:0.05589202601248773744,Chlamydia-  
Chlamydophila\_felis\_89898226:0.04311018211161270902)38:0.01336713248775750137)64:0.04745928672889750816)90:0.09  
004155818991942117)100:0.53300772528624984492)52:0.09896967190288009919)100:0.60161861037568609145,Bacteria-  
Thermotoga\_petrophila\_148270361:0.66326459416379979217)26:0.05850406901193302978)16:0.08239361639977153817,(Ba  
cteria-Dehalococcoides\_sp.\_147668701:0.62338291566842818359,(Bacteria-  
Herpetosiphon\_aurantiacus\_113938472:0.49931432233313999269,(Bacteria-  
Halothermothrix\_oreni\_89211718:0.30869893589536145928,(((Bacteria-  
Desulfotomaculum\_reducens\_134299523:0.21810176724457486230,Bacteria-  
Pelotomaculum\_thermopropionicum\_147677367:0.15640285234004408510)65:0.06011420616823744123,Bacteria-  
Moorella\_thermoacetica\_83590530:0.32868206925269760621)64:0.06196706314171749469,(Bacteria-  
Desulfitobacterium\_hafniense\_89895209:0.23897139851934531829,Bacteria-  
Thermosinus\_carboxydvorans\_121535583:0.21322213601555065066)15:0.03369210255289135231)17:0.03745529251159074  
313,(Bacteria-Thermoanaerobacter\_ethanolicus\_114844820:0.24484552542198409486,(Bacteria-  
Clostridium\_difficile\_126700418:0.11126136700613127595,Bacteria-  
Alkaliphilus\_metalliredigens\_150390106:0.13885424824334682836)86:0.06696240453330844222,(((Bacteria-  
Bacillus\_subtilis\_16079824:0.08635388710553076885,Bacteria-  
Geobacillus\_thermodenitrificans\_138896155:0.11108722619651449637)87:0.04096103742909298906,(((Bacteria-  
Streptococcus\_gordonii\_157150691:0.06121503183539143272,Bacteria-  
Lactococcus\_lactis\_116510984:0.11734213991932729293)100:0.08637074754366312612,(Bacteria-  
Pediococcus\_pentosaceus\_116493017:0.12217310668634071003,Bacteria-  
Lactobacillus\_casei\_116494315:0.17070192426850258616)76:0.04059560118154880576)100:0.12147349867305595739,Bacter  
ia-  
Listeria\_monocytogenes\_153166979:0.06398977052390678044)88:0.06678178565285075585)97:0.08906746284467263741,Ba  
cteria-  
Staphylococcus\_saprophyticus\_73662429:0.21090686146079090646)99:0.11982831575468599894)39:0.044542976231858738  
56)18:0.04098895389850593790,(Bacteria-  
Caldicellulosiruptor\_saccharolyticus\_146295324:0.33380154596128891464,Bacteria-

Symbiobacterium\_thermophilum\_51892304:0.28262444374050427198)28:0.09635710915179156177)3:0.01136329816667950438)26:0.04187813879964322888)67:0.10362637874702315677,(Bacteria-Acidobacteria\_bacterium\_94967175:0.58448749799314803077,(Bacteria-Desulfovibrio\_desulfuricans\_78357885:0.60933062975881002732,Bacteria-Stigmatella\_aurantiaca\_115379882:0.41416463581863044441)26:0.08760815003406945134)23:0.07073161174245568006,(((Bacteria-Magnetococcus\_sp.\_117923915:0.36976018719744585539,(Bacteria-Erythrobacter\_litoralis\_85373948:0.29969382263145499801,(Bacteria-Rhodobacterales\_bacterium\_126726306:0.14031165286621685717,(((Bacteria-Silicibacter\_sp.\_99080611:0.07380189124693480041,Bacteria-Roseobacter\_sp.\_126735583:0.09156504027867928830)64:0.02386924405210730585,Bacteria-Roseovarius\_sp.\_149202809:0.13895658314436459824)38:0.03153690738901929885,(Bacteria-Sagittula\_stellata\_126729583:0.14851459399392580307,Bacteria-Paracoccus\_denitrificans\_119384626:0.12917014903242415857)47:0.03914997927129240662)42:0.05589684235341548652)100:0.12803363138621701167)100:0.29239127002811587941)61:0.09281433037857450552,(((Bacteria-Pseudomonas\_syringae\_66044476:0.18091151472187816385,Bacteria-Marinobacter\_algicola\_149375024:0.15976335241624772809)36:0.02803235036099648719,Bacteria-Psychrobacter\_sp.\_148653724:0.35986245981304171293)68:0.06921399453685761483,(Bacteria-Thiomicrospira\_crunigena\_78485677:0.25415113325775195996,(Bacteria-Beggiatoa\_sp.\_153875174:0.20392492649810459171,Bacteria-Methylococcus\_capsulatus\_53805144:0.28479782323087782236)42:0.05603045109816904429)35:0.03910290180819098876)38:0.07393623586149360161,Bacteria-Halorhodospira\_halophila\_121998478:0.24109667492353145657)100:0.25777290319850554301)32:0.09393452448559649892,(Bacteria-Mariprofundus\_ferrooxydans\_114777994:0.44017485133369405048,Bacteria-Desulfuromonas\_acetoxidans\_95929300:0.24086999685473259314)7:0.05905506591659890475)11:0.05974593828791495420,(Bacteria-delta\_proteobacterium\_94263087:0.45053162867139162628,((Bacteria-Pelobacter\_propionicus\_118580220:0.22532610198918440192,Bacteria-Geobacter\_lovleyi\_118744126:0.25379912189157149971)97:0.13264717695618902238,Bacteria-Syntrophus\_aciditrophicus\_85860047:0.57526599254013310869)19:0.06073050387678822354)15:0.06402371059492424632)8:0.04525532808413595259)50:0.10603993850176145208)37:0.08861968354045718366)9:0.01564676431459196063)25:0.08028222817113192522)55:0.12569662033135853285,Bacteria-Rubrobacter\_xylanophilus\_108804169:0.61351508643651808672)77:0.09288315615691232485,Bacteria-Thermus\_thermophilus\_46199978:0.44954925518992966404)100:0.22797101903719785287,((((Cyanobacteria-Synechococcus\_sp.\_CC9902\_78183849:0.00699252464264535443,Cyanobacteria-Synechococcus\_sp.\_BL107\_116071540:0.01712121619916786436)100:0.07569586730964400489,(Cyanobacteria-Synechococcus\_sp.\_CC9605\_78211790:0.04792490800763465897,Cyanobacteria-Synechococcus\_sp.\_WH\_8102\_33864780:0.05817302638034517470)97:0.04010324033546866507)99:0.07206624861490923406,((Cyanobacteria-Prochlorococcus\_marinus\_str.\_MIT\_9303\_124024179:0.00226029290327897214,Cyanobacteria-Prochlorococcus\_marinus\_str.\_MIT\_9313\_33864129:0.00953603763896866685)100:0.09226837664142471807,((Cyanobacteria-Prochlorococcus\_marinus\_str.\_NATL1A\_124025063:0.00881640539092576510,Cyanobacteria-Prochlorococcus\_marinus\_str.\_NATL2A\_72383473:0.00569271774856764789)100:0.18778081750779013204,(Cyanobacteria-Prochlorococcus\_marinus\_subsp.\_marinus\_str.\_CCMP1375\_33239755:0.21217612055046033981,(Cyanobacteria-Prochlorococcus\_marinus\_str.\_MIT\_9515\_123965539:0.10512039074014695172,(Cyanobacteria-Prochlorococcus\_marinus\_str.\_AS9601\_123967830:0.01391457890948992297,Cyanobacteria-Prochlorococcus\_marinus\_str.\_MIT\_9301\_126695632:0.02965455951994204475)100:0.05702191830336936218)100:0.33555833773260285158)60:0.04355814951584106864)96:0.12397210163828230323)80:0.09316984169417534545)25:0.01458545207185867228,(Cyanobacteria-Synechococcus\_sp.\_CC9311\_113953818:0.09316115935334695619,((Cyanobacteria-Synechococcus\_sp.\_WH\_7803\_148238624:0.02539798930266220361,Cyanobacteria-Synechococcus\_sp.\_WH\_7805\_88808038:0.02105651103073242006)100:0.08893128442652190047,Cyanobacteria-Synechococcus\_sp.\_RS9917\_87125118:0.05789818216254626060)47:0.03260963697667216415)61:0.02235945026272818936)41:0.04449515671674351275,Cyanobacteria-Synechococcus\_sp.\_WH\_5701\_87301968:0.15738387334114620209)100:0.14175272409641795357,Cyanobacteria-Synechococcus\_sp.\_RCC307\_148243410:0.17974677890409521130)100:0.18126327316754167751)55:0.09363020904327822025)30:0.04422022325643615998)100:0.29150097560569054878,Cyanobacteria-Synechococcus\_sp.\_JA-3-3Ab\_86607442:0.09007656040629970218,Cyanobacteria-Synechococcus\_sp.\_JA-2-3Ba2-13\_86608004:0.01460359306670292075);

Plantae-Ostreococcus\_tauri\_21840

((((((Bacteria-Candidatus\_Desulfococcus\_121542771:0.50580432965369548359,(Bacteria-Syntrophobacter\_fumaroxidans\_116751069:0.45729688522538841644,Bacteria-delta\_proteobacterium\_94265985:0.68532283050959719173)54:0.13505840544102884482,(Bacteria-Desulfotalea\_psychrophila\_51246587:0.67656163295012927694,(Bacteria-Desulfuromonas\_acetoxidans\_95930458:0.63540511545487410316,Bacteria-

Pelobacter\_carbinolicus\_77919601:0.38636400153873967644)60:0.08994947640615481854)40:0.08633518439079701512)62:0.10830307440435128774)86:0.14454590812974424385,(((Bacteria-Dehalococcoides\_ethenogenes\_57234783:0.96958475852956305108,((Bacteria-Listeria\_monocytogenes\_153172836:0.31873851549886539347,(Bacteria-Bacillus\_sp.\_126654250:0.21339656452581898249,Bacteria-Geobacillus\_thermodenitrificans\_138893718:0.14727293969188853806)73:0.05676168791357853044)56:0.07528911327871984360,(Bacteria-Staphylococcus\_haemolyticus\_70727515:0.33543867227020546240,Bacteria-Streptococcus\_mutans\_24380339:0.60090623634419515486)51:0.12703007758340578714)89:0.18897645546915017856)23:0.07882281554604111951,(((Bacteria-Clostridium\_beijerinckii\_150015284:0.39086097809105846412,Bacteria-Caldicellulosiruptor\_saccharolyticus\_146297223:0.38764927380264940782)51:0.07647588868369288584,Bacteria-Thermoanaerobacter\_ethanolicus\_114844602:0.5770311169784104817)30:0.09925963754962570385,(Bacteria-Carboxydotherrhus\_hydrogenoformans\_78044899:0.62236188646600598684,(Bacteria-Pelotomaculum\_thermopropionicum\_147676431:0.40326888787841702610,Bacteria-Desulfotomaculum\_reducens\_134297973:0.36272955891870090062)65:0.09758886906518764170)35:0.08776457002792746598)3:0.02370495335361340328,Bacteria-Syntrophomonas\_wolfei\_114565639:0.50542495637270834496)7:0.06370386093326410593)15:0.08904898744134433219,(((Cyanobacteria-Gloeobacter\_violaceus\_PCC\_7421\_37519671:0.32074370156623149830,Cyanobacteria-Lyngbya\_sp.\_PCC\_8106\_119485100:0.36640097704202789775)99:0.15939734263731838992,((Cyanobacteria-Synechococcus\_sp.\_RCC307\_148242413:0.36909496337479713590,Cyanobacteria-Synechococcus\_sp.\_WH\_5701\_87302769:0.20664979388876356103)98:0.08487849343006849401,(((Cyanobacteria-Prochlorococcus\_marinus\_str\_MIT\_9313\_33862893:0.02140898116587524810,Cyanobacteria-Prochlorococcus\_marinus\_str\_MIT\_9303\_124023320:0.01814102207658989732)100:0.15272302320479921867,(((Cyanobacteria-Prochlorococcus\_marinus\_str\_NATL1A\_124025655:0.01143750686827168031,Cyanobacteria-Prochlorococcus\_marinus\_str\_NATL2A\_72382119:0.01058864319700243868)100:0.32136389502894013859,((Cyanobacteria-Prochlorococcus\_marinus\_str\_MIT\_9312\_78779251:0.01376529449014437557,(Cyanobacteria-Prochlorococcus\_marinus\_str\_AS9601\_123968461:0.02258911526621447743,Cyanobacteria-Prochlorococcus\_marinus\_str\_MIT\_9301\_126696264:0.03122623575575363131)93:0.00751681236199532119)100:0.10960110914538991056,(Cyanobacteria-Prochlorococcus\_marinus\_str\_MIT\_9515\_123966248:0.04159570339838733477,Cyanobacteria-Prochlorococcus\_marinus\_subsp\_pastoris\_str\_CCMP1986\_33861489:0.07323491428278591786)100:0.15883412589892642597)100:0.38247823473245595727)96:0.22900773907347302116,(Cyanobacteria-Prochlorococcus\_marinus\_str\_MIT\_9211\_84518232:0.17303137464864407069,Cyanobacteria-Prochlorococcus\_marinus\_subsp\_marinus\_str\_CCMP1375\_33240214:0.24873417377522860638)60:0.05661544772131020531)78:0.12247556777162706132)40:0.03410798696884049380,((Cyanobacteria-Synechococcus\_sp.\_CC9311\_113955450:0.16719226473438031366,Cyanobacteria-Synechococcus\_sp.\_RS9917\_87124271:0.09591458408731375063)91:0.03762373995521550718,(Cyanobacteria-Synechococcus\_sp.\_WH\_7803\_148239701:0.09754601469968866845,Cyanobacteria-Synechococcus\_sp.\_WH\_7805\_88808455:0.10562038494492301255)99:0.13644709010789549120)96:0.10641658763711765723)34:0.03557255572731609500,(Cyanobacteria-Synechococcus\_sp.\_WH\_8102\_33865587:0.13451784349492013071,((Cyanobacteria-Synechococcus\_sp.\_CC9902\_78184855:0.04527988298414252488,Cyanobacteria-Synechococcus\_sp.\_BL107\_116070729:0.02849048796983612991)100:0.12379257893099687715,Cyanobacteria-Synechococcus\_sp.\_CC9605\_78212719:0.11302549084352898900)45:0.03941248648391498799)88:0.05252948334178433182)64:0.12667186155937851244)100:0.44392061804960036842)72:0.13151750935283246235,(((Bacteria-Streptomyces\_coelicolor\_21221586:0.35756711743049401919,((Bacteria-marine\_actinobacterium\_88856862:0.12351366251748431557,(Bacteria-Clavibacter\_michiganensis\_148273551:0.15041241463475199525,Bacteria-Leifsonia\_xyli\_50955321:0.13061150165862348005)56:0.02864165299431507133)100:0.19400724439862035431,Bacteria-Arthrobacter\_aureoscens\_119960939:0.37742815411766006406)100:0.20073981828456680110)84:0.09374359821886843469,Bacteria-Nocardioides\_sp.\_119718075:0.46122598634581268850)100:0.38211728909589659509,Bacteria-Acidobacteria\_bacterium\_94971567:0.98124624125228399052)31:0.11015679484271953537)9:0.08351544055248498466)5:0.07329131447291850621,Bacteria-Desulfitobacterium\_hafniense\_109647798:0.62318194604832555239)6:0.06924907450159699385)20:0.10152409616242666357,((Bacteria-Francisella\_tularensis\_110669898:0.80086783939436723134,(((Bacteria-Ralstonia\_pickettii\_121529190:0.20133671980147566094,Bacteria-Burkholderia\_xenovorans\_91781714:0.30514701479684980256)44:0.05927161222464966128,(Bacteria-Herminimonas\_arsenicoxydans\_134096052:0.06047797748221732383,Bacteria-Janthinobacterium\_sp.\_152980074:0.07527345939197145619)100:0.30035779974866877451)43:0.05625648065892469712,(Bacteria-Polaromonas\_naphthalenivorans\_121603809:0.28662747980258751479,Bacteria-Comamonas\_testosteroni\_118052186:0.21105684619447345751)99:0.32016414253030522907)38:0.07233124639714712256,Bacteria-Bordetella\_bronchiseptica\_33599889:0.36947078599635330143)70:0.13723609142080681056,((Bacteria-Pseudomonas\_syringae\_71737559:0.37414937630649008904,((Bacteria-

Shewanella putrefaciens\_146291903:0.36356578769406705520,(Bacteria-  
Aeromonas\_salmonicida\_145298190:0.29194511611555007402,Bacteria-  
Pseudoalteromonas\_tunicata\_88861341:0.45498763258640162466)22:0.03208079875524270236)39:0.04867937318368160265,  
((Bacteria-Hahella\_chejuensis\_83644564:0.36194336754197720118,Bacteria-  
Marinobacter\_algicola\_149377998:0.30854528791040580771)61:0.13195441913860342376,(Bacteria-  
Klebsiella\_pneumoniae\_152970784:0.28542007461253837697,(Bacteria-  
Haemophilus\_somnus\_113461140:0.20590224713573532234,Bacteria-  
Actinobacillus\_succinogenes\_152979409:0.14617664174342423489)99:0.10314581772368348889,Bacteria-  
Photobacterium\_profundum\_90412787:0.30437623369829985842)71:0.06572043350720080390)74:0.04958085207212831191)  
30:0.05639270311216848519)26:0.04924448074787884932)35:0.07476972781447245586,(Bacteria-  
Alkalilimnicola\_ehrlichei\_114319444:0.38447718296670646554,Bacteria-  
Methylococcus\_capsulatus\_53804650:0.43358261414262544431)16:0.06004612554152993775)56:0.07653165285716197197)9  
8:0.35649264760873400348)71:0.13496298711335599774,(Bacteria-  
Mariprofundus\_ferrooxydans\_114777711:0.86798601813777853664,Bacteria-  
Magnetococcus\_sp.\_117924127:0.55093953360104630512)58:0.18050525446607301738)69:0.09174854235373090805)44:0.1  
8350785676940264968,Bacteria-  
Parabacteroides\_merdae\_154492215:1.06547468201954775857)95:0.29709505110820549900,(((Chlamydia-  
Candidatus\_Protoclhamydia\_46447223:0.44921766561080794800,(Plantae-  
Gracilaria\_changii\_120463315\_2:0.37083443146026595638,Plantae-  
Cyanidioschyzon\_merolae\_CMS444C:0.61824056561239670859)21:0.02263565118511486757)62:0.13485445926638431335,(  
Chromalveolata-Phaeodactylum\_tricornutum\_51700:0.22602676629827855859,Chromalveolata-  
Thalassiosira\_pseudonana\_31907:0.15686252627009036886)100:0.29697232093384340335)45:0.04790055995429806646,(Pla  
ntae-Physcomitrella\_patens\_190580:0.18773310521669753226,(Plantae-  
Arabidopsis\_thaliana\_15225820:0.14415777880428071178,Plantae-  
Oryza\_sativa\_115440529:0.09944200235971600854)53:0.07017749654344011823)100:0.20218945913073016474,(Plantae-  
Ostreococcus\_lucimarinus\_4287:0.05213456444895723380,Plantae-  
Ostreococcus\_tauri\_21840:0.08033420933287499510)99:0.08329626807719568704,Plantae-  
Chlamydomonas\_reinhardtii\_137673:0.30359840380890551481)99:0.16619447265233358579)99:0.16741160004036145792)5  
5:0.10230775830196663090,Chromalveolata-  
Aureococcus\_anophagefferens\_65516:0.87422770944854388819)90:0.14929111412709844542)100:0.67308853931310064223,  
(((Chlamydia-Chlamydia\_trachomatis\_15605538:0.00404898169859768155,Chlamydia-  
Chlamydia\_trachomatis\_76789547:0.00217559110076925378)100:0.13435708006937135961,Chlamydia-  
Chlamydia\_muridarum\_15834807:0.14272277342418571155)100:0.46001705091069894360,(Chlamydia-  
Chlamydophila\_caviae\_29840572:0.03841739282171486441,(Chlamydia-  
Chlamydophila\_felis\_89898006:0.08001616830047572626,Chlamydia-  
Chlamydophila\_abortus\_62185389:0.11495450980610819047)76:0.04427373394204736634)99:0.25418537735695362345)85:0  
.19058786548442960274)100:0.24699119325640550571,Chlamydia-  
Chlamydophila\_pneumoniae\_33242322:0.00000121823947223981,Chlamydia-  
Chlamydophila\_pneumoniae\_15836487:0.00000121823947223981);

Plantae-Ostreococcus\_tauri\_31283

(((Chromalveolata-Aureococcus\_anophagefferens\_6675:0.85203265156447327566,(Plantae-  
Cyanophora\_paradoxa\_Contig299\_5:0.57218442224666288265,(((Chlamydia-  
Chlamydia\_muridarum\_15835243:0.04687978548083194391,(Chlamydia-  
Chlamydia\_trachomatis\_76789075:0.00000121823947223981,Chlamydia-  
Chlamydia\_trachomatis\_15605072:0.00000121823947223981)100:0.04482649177031228921)100:1.53198524721926387926,(E  
xcavata-Trypanosoma\_cruzi\_71663480:0.36193474545110981833,Excavata-  
Trypanosoma\_brucei\_74025836:0.46173491336111033290)97:0.53253713018251824796)79:0.17131890605544786155,Plantae

-  
Gracilaria\_changii\_Contig101\_3:1.02246356512522473814)29:0.05874593306059323200)72:0.14817464271407104759)18:0.1  
2382927978239226252,(Chromalveolata-Isochrysis\_galbana\_Contig924\_2:1.62338249018437474902,Plantae-  
Cyanidioschyzon\_merolae\_CMB088C:0.15122287865648995075)62:0.28113559468836613053)14:0.05428537195469642501,(  
Plantae-Physcomitrella\_patens\_181169:0.32766760369412328835,(Plantae-  
Arabidopsis\_thaliana\_22328154:0.27505612098752674211,(Plantae-  
Oryza\_sativa\_115455047:0.44120194940417073459,(Plantae-  
Arabidopsis\_thaliana\_42568283:0.26094914338486341343,Plantae-  
Oryza\_sativa\_115485855:0.26617594482524764565)46:0.03670945223099039006)41:0.01843419449599981164)70:0.0899633  
7085552512380,Plantae-  
Oryza\_sativa\_115451707:0.27399184956375616240)88:0.09998131379382058093)71:0.10925314915144369865)35:0.2050457  
0076162234593,(Plantae-Volvox\_carteri\_88280\_jgi:0.19110328273624857531,Plantae-  
Chlamydomonas\_reinhardtii\_123186:0.05659878113698368907)100:0.41140691028497994308)20:0.09309560024514033916,

Chromalveolata-Phaeodactylum\_tricornutum\_5720:0.68832653779179286957)98:0.39666526354851938674,Plantae-Ostreococcus\_tauri\_31283:0.15136325762946944984,Plantae-Ostreococcus\_lucimarinus\_29918:0.13829880922374471197);

Plantae-Ostreococcus\_tauri\_37113

(Bacteria-Thiomicrospira\_crunogena\_78486478:0.70001517611978636424,(Bacteria-Desulfovibrio\_vulgaris\_120601318:0.59765588696877280928,(((Chlamydia-Chlamydophila\_abortus\_62185185:0.08135156024156894872,(Chlamydia-Chlamydophila\_felis\_89898215:0.03382340629683759647,Chlamydia-Chlamydophila\_caviae\_29840354:0.03922467246425751647)62:0.01511453150795305858)100:0.15686560291286688607,(((Chlamydia-Chlamydophila\_pneumoniae\_15835770:0.00000121823947223981,Chlamydia-Chlamydophila\_pneumoniae\_15618159:0.00000121823947223981)20:0.00000121823947223981,Chlamydia-Chlamydophila\_pneumoniae\_16752803:0.00000121823947223981)21:0.00000121823947223981,Chlamydia-Chlamydophila\_pneumoniae\_33241576:0.00000121823947223981)100:0.22204366049162535535)100:0.62555671200161488965,(((Plantae-Oryza\_sativa\_115465429:0.13925877668355529648,Plantae-Arabidopsis\_thaliana\_30695393:0.06258397151319997076)69:0.08241921346245760505,Plantae-Physcomitrella\_patens\_154565:0.18488831689583162809)92:0.22851388485651796811,(Plantae-Ostreococcus\_tauri\_37113:0.36482070329131716102,Plantae-Ostreococcus\_lucimarinus\_27757:0.17290245718026803212)100:1.04694272074952765550)98:0.16625564619966884394)99:0.20303648383192782201,Bacteria-Parabacteroides\_distasonis\_150007177:0.43808515576337214714)58:0.07750752973525382172)93:0.14681323984527344662,Bacteria-Saccharophagus\_degradans\_90021703:0.48231988085753468853);

Plantae-Ostreococcus\_tauri\_8662

(Bacteria-Bradyrhizobium\_sp\_148257427:0.18830442920055975864,(((Bacteria-Bruceella\_ovis\_148559451:0.02561471497346131179,Bacteria-Ochrobactrum\_anthropi\_153009066:0.03576570522629236859)100:0.41943904701710404970,Bacteria-Parvibaculum\_lavamentivorans\_154252855:0.26636390271310439459)67:0.09737711252267608475,(Bacteria-Methylobacterium\_sp\_149126077:0.25268511364403067887,(Bacteria-Magnetococcus\_sp\_117924071:0.45772855017366781416,(((Bacteria-Lawsonia\_intracellularis\_94987539:0.42399666508409711296,Bacteria-Desulfovibrio\_vulgaris\_120601783:0.30741764404826976698)100:0.35016980638814920734,(((Bacteria-Chlorobium\_chlorochromatii\_78188031:0.73557126098905800671,(Chlamydia-Candidatus\_Protoclamydia\_46445945:0.54393669157648005807,(Plantae-Ostreococcus\_tauri\_8662:0.13154848376700092882,Plantae-Ostreococcus\_lucimarinus\_33240:0.10196415445367824903)100:0.34353969069628714772,(Plantae-Physcomitrella\_patens\_43703:0.32744130855985609241,(Plantae-Oryza\_sativa\_115444103:0.24520569070820524837,Plantae-Arabidopsis\_thaliana\_15238896:0.26666422791418198379)100:0.30347374071173299770)95:0.13247732322162297791,Planta e-Volvox\_carteri\_97159\_jgi:0.40463708107246698642)88:0.15998729220921753535)97:0.13394748264162953388)100:0.25917187940504876620)33:0.10005426850793520954,(Bacteria-Carboxydotherrus\_hydrogenoformans\_78043538:0.33461148407271290584,(((Bacteria-Symbiobacterium\_thermophilum\_51892339:0.32315853449993481306,(((Bacteria-Clostridium\_difficile\_126700272:0.21729846120089046924,Bacteria-Alkaliphilus\_metalliredigens\_150390647:0.23888295661388697644)91:0.10261740866761664970,(Bacteria-Thermoanaerobacter\_ethanolicus\_114844128:0.23713079660971730922,(Bacteria-Eubacterium\_ventriosum\_154485082:0.13924137754317317262,(Bacteria-Dorea\_longicatena\_153854700:0.13446768708633621836,Bacteria-Ruminococcus\_obeum\_153809802:0.14572820558666005342)89:0.04714852280729148193)100:0.27695895548458898672)21:0.03189089615552404000)31:0.05584869469067176018,(Bacteria-Caldicellulosiruptor\_saccharolyticus\_146295951:0.50601172060226862204,Bacteria-Thermosinus\_carboxydvorans\_121535927:0.31011291640825450200)41:0.09347100199745787819)30:0.05386936612261301188,(((Bacteria-Desulfotomaculum\_reducens\_134298535:0.25508591430115984400,(((Bacteria-Bacillus\_pumilus\_157692188:0.16727017541836272652,(Bacteria-Geobacillus\_thermodenitrificans\_138894646:0.21141603185405652421,(((Bacteria-Streptococcus\_thermophilus\_116628390:0.16177987910699889729,Bacteria-Lactococcus\_lactis\_125624479:0.16089838705167677779)100:0.13203877422120449681,Bacteria-Staphylococcus\_haemolyticus\_70726737:0.27700223653455691153)42:0.05923774646800541305,(Bacteria-Listeria\_monocytogenes\_153175268:0.15482300715607855146,(Bacteria-Pediococcus\_pentosaceus\_116492952:0.14632060252381340337,(Bacteria-Oenococcus\_oeni\_116491168:0.53031448015175175481,Bacteria-Lactobacillus\_salivarius\_90962030:0.12436112504046190064)88:0.06885833851706314734)92:0.13139743584601851212)21:0.02641755000356947602)40:0.06841300235274973274)12:0.02710771999947868618)100:0.26433442415349311938,Bacteria



-  
Desulfitobacterium\_hafniense\_109645973:0.34780725804099604792)36:0.08356065982786746449)20:0.069938788517229219  
52,(Bacteria-Pelotomaculum\_thermopropionicum\_147678204:0.27807779927582926272,Bacteria-  
Moorella\_thermoacetica\_83589686:0.45868806836417602701)34:0.08137662304285063486)0:0.05080407203568686192)5:0.0  
7554162728410106220)2:0.02366744425507467942,(Bacteria-  
Bacteroides\_capillosus\_154500741:0.42025151505049107570,(Bacteria-  
Arthrobacter\_sp.\_116670123:0.33028412767809556261,Bacteria-  
Mycobacterium\_ulcerans\_118618804:0.48655004459776535208)100:0.38207668371068542745)8:0.03955804509511984257)1  
2:0.04734604076561860914)56:0.08514658351523093915)16:0.05820284244196003570,(Bacteria-  
Pelobacter\_propionicus\_118581697:0.25735569043375644549,Bacteria-  
Geobacter\_bemidjiensis\_145619002:0.23474239531312826590)100:0.20738901428056030762)18:0.03927716004997061638,((  
Bacteria-Syntrophus\_aciditrophicus\_85858517:0.49489663273416878431,(Bacteria-  
Dehalococcoides\_sp.\_147668966:0.49500915141159024246,(Bacteria-  
Herpetosiphon\_aurantiacus\_113940985:0.46055103613187881040,Bacteria-  
Roseiflexus\_sp.\_148657877:0.28180993079869276485)72:0.05456687998023467684)71:0.07367151286678083610)20:0.04926  
363861883172740,Bacteria-  
Syntrophobacter\_fumaroxidans\_116750882:0.61445000765568658085)3:0.02458698224754185188)5:0.0369649908387999631  
7)66:0.10444425758223803424,(Bacteria-Methylococcus\_capsulatus\_53803411:0.42431592905480391975,(Bacteria-  
Nitrosococcus\_oceani\_77166320:0.38519544689560331063,(((Bacteria-  
Oceanospirillum\_sp.\_89095267:0.24726403065902205491,Bacteria-  
Marinomonas\_sp.\_152996635:0.28674569095837926236)100:0.15348151463868545119,(Bacteria-  
Saccharophagus\_degradans\_90020487:0.35074055406267423685,Bacteria-  
Oceanobacter\_sp.\_94501904:0.23915904676412380603)73:0.09985932427529956024)71:0.07035300917707913715,Bacteria-  
Pseudomonas\_aeruginosa\_107099995:0.23585054505439728700)85:0.10779609812988259765)48:0.07320996046409400382)1  
00:0.23529520068582029935)47:0.03341801244317009478)100:0.30046887773932312582)25:0.04214765026090690897)100:  
0.22019251949052939810,Bacteria-Rhodopseudomonas\_palustris\_90423689:0.17940765660077634402);

#### Plantae-Physcomitrella\_patens\_218794

(Chlamydia-Chlamydophila\_pneumoniae\_15835695:0.00000121823947223981,((Chlamydia-  
Chlamydophila\_pneumoniae\_16752883:0.00000121823947223981,(((Chromalveolata-  
Plasmodium\_falciparum\_124804314:1.20835944402427086786,(Excavata-  
Euglena\_gracilis\_Contig2354\_1:0.65776072851010347620,(Plantae-  
Physcomitrella\_patens\_218994:0.02840593516292887893,Plantae-  
Physcomitrella\_patens\_55781:0.07329692330673313883)100:0.13779040653901267199,(Plantae-  
Oryza\_sativa\_115476012:0.21690635052098250490,(Plantae-Oryza\_sativa\_115467858:0.02719337114943972192,Plantae-  
Oryza\_sativa\_115448277:0.05328965741988367366)80:0.03447890622746425937,(Plantae-  
Arabidopsis\_thaliana\_15223082:0.02935045022377573420,Plantae-  
Arabidopsis\_thaliana\_15218074:0.04970177054475031359)100:0.09478282791516762229)91:0.07498586477095083025)100:0  
.12243104718999257841)100:0.25592669895784081469)95:0.10913495811223823673)39:0.10343280211110286726,(((Excav  
ata-Trichomonas\_vaginalis\_123420894:1.21909879107291274636,(Bacteria-  
Stigmatella\_aurantiaca\_115378537:0.61376593628079045839,((Excavata-  
Jakoba\_libera\_Contig381\_2:0.48645606345440328688,Excavata-Naegleria\_gruberi\_35679-  
estExt\_gwp\_gw1.C\_90072:0.43084175631161658604)40:0.18858554331968882534,Bacteria-  
Thermotoga\_petrophila\_148269759:0.40694584305908954036)40:0.23846108349969244444)62:0.22345168435925846784)10  
0:0.58008323827338348355,(((Bacteria-Rubrobacter\_xylanophilus\_108804902:0.65232478864045095879,(Bacteria-  
Pelotomaculum\_thermopropionicum\_147677721:0.28811780114510043838,Bacteria-  
Carboxydotherrmus\_hydrogenoformans\_78043322:0.52091615886288977766)99:0.29916111925108168634)98:0.310801525469  
29201707,(Bacteria-Thermoanaerobacter\_ethanolicus\_114845141:0.39380387353847357002,(Bacteria-  
Algoriphagus\_sp.\_126649002:0.38232757011217027854,Bacteria-  
Flavobacteria\_bacterium\_89891192:0.37520191820463227872)96:0.20113624446856398498)100:0.27562260361882839899)9  
6:0.29922671031084568938,((Bacteria-Frankia\_sp.\_86741530:0.24675822594304100410,Bacteria-  
Kineococcus\_radiotolerans\_152968217:0.23659070153296457573)100:0.40526649529022990004,(Amoebozoa-  
Entamoeba\_histolytica\_67482265:0.01351768071770072591,Amoebozoa-  
Entamoeba\_histolytica\_67476240:0.01345232844176335110)100:0.64913031306954738220)100:0.76811374983616564904)95  
:0.31585570453958761172)100:0.58457613375038830483,Plantae-  
Glaucozystis\_nostochinearum\_Contig1177\_1:0.68810681518361138664)38:0.26096913477782046620,((Chlamydia-  
Candidatus\_Protochlamydia\_46446514:0.36774782867225425109,(Chromalveolata-  
Plasmodium\_falciparum\_124506857:0.69936245261267904194,(Bacteria-  
Candidatus\_Desulfococcus\_121542302:0.68379366537588248676,Bacteria-  
Syntrophobacter\_fumaroxidans\_116750796:0.57847041543877475434)83:0.16517140621590609140,((Chlamydia-  
Chlamydophila\_felis\_89898202:0.03178775445954938605,(Chlamydia-  
Chlamydophila\_abortus\_62185197:0.02137145226229079931,Chlamydia-

Chlamydomonada\_caviae\_29840366:0.02299196847978217037)89:0.01337380207862569684)100:0.07461998652903611973,((Chlamydia-Chlamydia\_trachomatis\_15604925:0.00000121823947223981,Chlamydia-Chlamydia\_trachomatis\_76788927:0.00431462692513677384)99:0.04367052235165817808,Chlamydia-Chlamydia\_muridarum\_15835095:0.05127556433343457426)100:0.17623073118569523854)99:0.06843159391452642570,(Chlamydia-Chlamydomonada\_pneumoniae\_15835743:0.00000121823947223981,(Chlamydia-Chlamydomonada\_pneumoniae\_16752833:0.00000121823947223981,(Chlamydia-Chlamydomonada\_pneumoniae\_33241547:0.00000121823947223981,Chlamydia-Chlamydomonada\_pneumoniae\_15618132:0.00000121823947223981)17:0.00000121823947223981)14:0.00000121823947223981)100:0.11696917454467022079)100:0.50340852439963656995)15:0.03727220110849934626)10:0.03492382689511989297)2:0.04779708589352683890,(((Excavata-Euglena\_gracilis\_109786964\_3:0.00000121823947223981,Excavata-Euglena\_gracilis\_109785016\_3:0.00090564044648994819)73:0.42792717051502787706,Chromalveolata-Paramecium\_tetraurelia\_124429824:0.32376913961006664744)47:0.13008438762506582820,(((Plantae-Porphyraceae-Porphyraceae\_Porphyraceae\_Contig890\_1:0.19224285512545297161,Plantae-Cyanidioschyzon\_merolae\_CMH052C:0.33147141815533232023)43:0.08972070520682014216,(Plantae-Galdieria\_sulphuraria\_Contig417\_1:0.12946655498172079946,Plantae-Galdieria\_sulphuraria\_Contig132\_3:0.17244675509608620168)98:0.10798556065223262335)38:0.05402253198857343008,Plantae-Porphyraceae\_Porphyraceae\_AV434269\_2:0.26013547243401208275)81:0.10558727632981135258,(Plantae-Oryza\_sativa\_115467370:0.07175210634280602962,(Plantae-Arabidopsis\_thaliana\_15221156:0.07384059582093772944,Plantae-Arabidopsis\_thaliana\_30679628:0.08382321595916689128)77:0.03884561183910403837)93:0.07607022823313240589,(Plantae-Physcomitrella\_patens\_188815:0.09286380994341331130,(Plantae-Physcomitrella\_patens\_107676:0.06041498389452922696,Plantae-Physcomitrella\_patens\_218794:0.02214676552498514445)99:0.07113571985159253264)99:0.09551418830081596922)99:0.28378067995053007921)15:0.06461995072742353352)6:0.04378403467608589505,(Plantae-Gracilaria\_changii\_120463673\_3:0.63268836420419916067,(Excavata-Giardia\_lamblia\_159114566:0.00000121823947223981,Excavata-Giardia\_lamblia\_157435613:0.00892185987353322912)100:0.47697965499317424021)53:0.09941846340149131100,(Rhizaria-Reticulomyxa\_filosa\_EE664370\_3:0.94057023501206393767,(Amoebozoa-Entamoeba\_histolytica\_67474879:0.37863747550124970953,(Bacteria-Parabacteroides\_distasonis\_150008153:0.08643206896319155508,Bacteria-Bacteroides\_vulgatus\_150004823:0.06574193839386427429)100:0.19999722323774454802)57:0.07282860170087231133,(Bacteria-Treponema\_denticola\_42527058:0.23801612506535121949,Bacteria-Borrelia\_garinii\_51598283:0.38541136189984648297)27:0.05860673777964019865)49:0.05808589775835382857)9:0.02799115924378565295)5:0.05149992633840592277)7:0.03692221734310761200)2:0.02824074580174385993)10:0.03241012234332533298)100:0.58518529528823415298,(Chlamydia-Chlamydia\_muridarum\_15835097:0.05409221692176190144,(Chlamydia-Chlamydia\_trachomatis\_15604927:0.00200440026545794028,Chlamydia-Chlamydia\_trachomatis\_76788929:0.01086427552752633127)100:0.04111449695160136059)100:0.13427136625720703655)68:0.09014046601054108432,(Chlamydia-Chlamydomonada\_abortus\_62185199:0.03713148852215986812,(Chlamydia-Chlamydomonada\_caviae\_29840368:0.01879302003410709965,Chlamydia-Chlamydomonada\_felis\_89898200:0.03911749406847455507)73:0.02109761020470437773)99:0.07997213384312837348)100:0.13618133009352834106)10:0.00000121823947223981,Chlamydia-Chlamydomonada\_pneumoniae\_15618084:0.00000121823947223981)12:0.00000121823947223981,Chlamydia-Chlamydomonada\_pneumoniae\_33241496:0.00000121823947223981);

Plantae-Physcomitrella\_patens\_219372

(((Bacteria-Petrogona\_mobilis\_145621604:0.47080870913021899415,(Bacteria-Alkaliphilus\_metalliredigens\_150388901:0.33136722162371573530,Bacteria-Thermoanaerobacter\_ethanolicus\_114843849:0.42937605994712368940)45:0.04886530893105391071,Bacteria-Clostridium\_thermocellum\_125973390:0.3237885366551993180)57:0.07799405634370656926)46:0.10186032292350613582,(((Cyanobacteria-Cyanobacteria\_sp.\_CCY0110\_126656374:0.73276719849006766161,Bacteria-Syntrophomonas\_wolfei\_114565915:0.85506296731785436105)16:0.16592627356213923706,(((Bacteria-Arthrobacter\_sp.\_116670755:0.33596287196402596642,(Bacteria-Acidothermus\_cellulolyticus\_117928174:0.35967432572744512109,(((Bacteria-Saccharopolyspora\_erythraea\_134098264:0.32273026689605044393,(Bacteria-Mycobacterium\_gilvum\_145223544:0.40366731801884259134,Bacteria-Rhodococcus\_sp.\_111018141:0.25842538617452576188)88:0.10344473808743326337)70:0.06394708156102459073,Bacteria-Salinispora\_tropica\_145595813:0.35664351644668390584)52:0.06438354119760374139,Bacteria-Thermobifida\_fusca\_72161428:0.34986782986341846691)41:0.06780411571231807766)41:0.05754177901229842740)100:0.42971231754804406489,(((Chromalveolata-Phaeodactylum\_tricornutum\_14230:0.00000121823947223981,Chromalveolata-Phaeodactylum\_tricornutum\_28937:0.00000121823947223981)100:0.45306915673459041694,Chromalveolata-Aureococcus\_anophagefferens\_31792:0.60135019330328287612)97:0.24464953650458670653,(((Chromalveolata-Phytophthora\_sojae\_120969:0.50158102343309141080,Plantae-

Cyanidioschyzon\_merolae\_CMC098C:0.60133069957033247199)26:0.06249365812189198316,((Chlamydia-  
Chlamydomphila\_caviae\_29840321:0.06801771111648878543,Chlamydia-  
Chlamydomphila\_felis\_89898246:0.04053847275349523743)100:0.73124373272629517029,(Plantae-  
Chlamydomonas\_reinhardtii\_126030:0.42401980434019914679,(Plantae-  
Ostreococcus\_lucimarinus\_32105:0.04068163113361368544,Plantae-  
Ostreococcus\_tauri\_33342:0.11304616415661168649)100:0.28261777627430251236)94:0.13082207764897643698,(Plantae-  
Physcomitrella\_patens\_219372:0.28184505315604718723,(Plantae-  
Oryza\_sativa\_115450443:0.24378971550594233375,Plantae-  
Arabidopsis\_thaliana\_15238711:0.16837830637349712748)100:0.18581728143543477239)100:0.17390926224877437112)92:0.  
.10668094854224084711)58:0.06639305019106879480)23:0.02896964424602786747)93:0.11620728603184846128)73:0.1062  
6995357206808768,Bacteria-  
Shewanella\_sp.\_114047031:0.8666259227759198378)30:0.06533308603515051993)13:0.05707253451286126850,((((Bacteri  
a-Carboxydotherrmus\_hydrogeniformans\_78044554:0.51735977806399424672,Bacteria-  
Desulfotomaculum\_reducens\_134298128:0.41685511518010054388)78:0.13143074670462032150,Bacteria-  
Moorella\_thermoacetica\_83590187:0.43936435871349066584)9:0.03359904590045203338,Bacteria-  
Acidobacteria\_bacterium\_94970911:0.53117942057480116436)2:0.06420551922937715872,(((Bacteria-  
Chloroflexus\_aggregans\_118046823:0.18491966502615692081,Bacteria-  
Roseiflexus\_castenholzii\_156742126:0.24431533106114050602)100:0.23492283901147886782,Bacteria-  
Dehalococcoides\_sp.\_147669912:0.48561669145712410556)72:0.08323466787098347808,Bacteria-  
Symbiobacterium\_thermophilum\_51892547:0.39245185586495490160)18:0.09012422512172765798)3:0.04026089729810835  
433,(Bacteria-Rubrochloa\_xylanophilus\_108804914:0.46311139170362386475,(Bacteria-  
Ralstonia\_solanacearum\_17548902:0.46063126704871920625,(Bacteria-  
Xanthobacter\_autotrophicus\_154248296:0.25268861677939202792,(Bacteria-  
Rhodopseudomonas\_palustris\_86749914:0.11594418726660288277,(Bacteria-  
Nitrobacter\_hamburgensis\_92117280:0.11838009034551030818,Bacteria-  
Bradyrhizobium\_japonicum\_27379920:0.10787106195460544056)74:0.02855322647826223983)97:0.09679076206867751053)  
94:0.09677871407237413626,(Bacteria-Methylbacterium\_extorquens\_153900379:0.42935063038892323783,(Bacteria-  
Agrobacterium\_tumefaciens\_15888992:0.20158693509073680183,Bacteria-  
Sinorhizobium\_medicae\_150396622:0.20170486659404524010)100:0.09143829508904564862)62:0.05672414945021995308,((  
Bacteria-Aurantimonas\_sp.\_90419612:0.22091240792819263894,Bacteria-  
Fulvimarina\_pelagi\_114707420:0.28999131710553882613)100:0.15935837766105553914,Bacteria-  
Mesorhizobium\_sp.\_110633990:0.20149858572196943651)59:0.04188630841425510648)44:0.04923298417737447669)29:0.0  
4150368834278563707)95:0.10615686042835803526,(Bacteria-  
Parvibaculum\_lavamentivorans\_154253611:0.31393388571211999771,(Bacteria-  
Rhodospirillum\_rubrum\_83593231:0.22695650133258643555,Bacteria-  
Magnetospirillum\_magneticum\_83311961:0.36450625661345542605)62:0.09520647672159243680)80:0.056887193832533641  
81)95:0.17303260017947899585)74:0.11422712452061327404,Bacteria-  
Anaeromyxobacter\_dehalogenans\_86160470:0.49271849067448358905)16:0.06151128011113523447)6:0.08054447965872281  
456)11:0.02560687683212867563)99:0.20036795554115127693,(Bacteria-  
Chromobacterium\_violaceum\_34497628:0.25708652967999151562,(((Bacteria-  
Azoarcus\_sp.\_56477814:0.19468916297222446654,Bacteria-  
Dechloromonas\_aromatica\_71909088:0.13322511547766335838)92:0.06561558584975797637,(Bacteria-  
Stenotrophomonas\_maltophilia\_119878293:0.14673042387419793497,Bacteria-  
Xylella\_fastidiosa\_28198103:0.28659017609244030744)100:0.13839562410160477501)86:0.04732712538467952201,Bacteria-  
Methylbium\_petroleiphilum\_124268645:0.25467725510858563176)99:0.12191393940102766835,Bacteria-  
Neisseria\_meningitidis\_121634768:0.34946453281855860418)46:0.03272657979135049772)100:0.21681828293120444795)97  
:0.09788012121410423483,Bacteria-  
Thiomicrospira\_crunogena\_78484613:0.42697954869079879359)59:0.05894053974653503530,((Bacteria-  
Beggiatoa\_sp.\_153870024:0.27461044045871862984,(Bacteria-  
Nitrosococcus\_oceani\_77165954:0.25851843138599511773,Bacteria-  
Methylococcus\_capsulatus\_53803265:0.33781353390532503633)49:0.07104307861950788505)63:0.08369653801250236114,B  
acteria-Alkalilimnicola\_ehrlichei\_114321397:0.36129045173261215007)37:0.06602939417398331901,Bacteria-  
Candidatus\_Ruthia\_118602164:0.55985667412328687931);

Plantae-Physcomitrella\_patens\_55802

(((Chlamydia-Chlamydomphila\_pneumoniae\_33241718:0.00000121823947223981,Chlamydia-  
Chlamydomphila\_pneumoniae\_15618288:0.00000121823947223981)22:0.00000121823947223981,(Chlamydia-  
Chlamydomphila\_abortus\_62185038:0.05239000026607414096,(Chlamydia-  
Chlamydomphila\_caviae\_29840185:0.03696886539815637251,Chlamydia-  
Chlamydomphila\_felis\_89898391:0.05115358339316190134)75:0.02299821135682846018)96:0.05276988733583318908,((Chla  
mydia-Chlamydia\_muridarum\_15834947:0.08807184671693175926,(Chlamydia-  
Chlamydia\_trachomatis\_15604776:0.00000121823947223981,Chlamydia-

Chlamydia\_trachomatis\_76788770:0.00000121823947223981)100:0.11296171593422218993)100:0.12473427301168686643,((Chlamydia-Candidatus\_Protoclhamydia\_46446374:0.22676148576007132407,(((Plantae-Arabidopsis\_thaliana\_30697397:0.00000121823947223981,Plantae-Arabidopsis\_thaliana\_30697395:0.00000121823947223981)100:0.03974465016138740980,Plantae-Oryza\_sativa\_115447171:0.06029029023595906811)98:0.07216927413880408482,((Plantae-Physcomitrella\_patens\_55802:0.00584754315397417995,Plantae-Physcomitrella\_patens\_233105:0.02793994918039225533)70:0.01981462798426785951,Plantae-Physcomitrella\_patens\_130936:0.06004041858988539565)89:0.04182949962624766399)97:0.08297689164305356579,((((Rhizaria-Bigelowiella\_natans\_Contig164\_3:1.28024526102074909240,Chromalveolata-Isochrysis\_galbana\_ISE00009753\_2:1.99867693247502797860)36:0.08529732505760778682,Chromalveolata-Emiliania\_huxleyi\_UI-EH-HG1-aae-c-17-0-UI.s1\_4:0.00000121823947223981)35:0.28426151688126277683,((Chromalveolata-Aureococcus\_anophagefferens\_71112:0.14497251919294062983,(Chromalveolata-Thalassiosira\_pseudonana\_29228:0.09262475555184658538,Chromalveolata-Phaeodactylum\_tricornutum\_44955:0.04155527940142136195)100:0.15410545031534197968)59:0.06450122377697323217,Chromalveolata-Guillardia\_theta\_88770650:0.10718946621869424041)25:0.03063895482300561801)43:0.06807606955963736717,((Chromalveolata-Plasmodium\_falciparum\_124802547:0.67528966108900168042,Plantae-Chlamydomonas\_reinhardtii\_55268:0.00802574977597945473)44:0.03541914679832490476,Plantae-Volvox\_carteri\_63610\_jgi:0.03339180168904673507)60:0.10415385210792293957)35:0.04154506274941901361,(Plantae-Ostreococcus\_lucimarinus\_12863:0.03292112463491071728,Plantae-Ostreococcus\_tauri\_19063:0.02836769076305388146)100:0.16600107222599339019)42:0.06934442046947635052)68:0.17728566990944727433)73:0.07194578433481391144,(((Bacteria-Bacteroides\_thetaiotaomicron\_29347927:0.24398854700204575252,Bacteria-Parabacteroides\_distasonis\_150009758:0.15513074071193816428)100:0.26116619335154644954,((Bacteria-Cytophaga\_hutchinsonii\_110638588:0.10648403841196653341,(Bacteria-Microscilla\_marina\_124008572:0.14325248033658002922,Bacteria-Algoriphagus\_sp.\_I26647633:0.12016732319960958530)55:0.04631796945774341312)61:0.07053321981051641210,Bacteria-Pedobacter\_sp.\_149278639:0.16471178954300738639)93:0.07125851122093652956)98:0.11511436831950944137,(Bacteria-Leptospira\_interrogans\_24215859:0.31437624421081450388,(Bacteria-Chlorobium\_chlorochromatii\_78188327:0.06122127519179303839,(Bacteria-Prosthecochloris\_vibrioformis\_145220416:0.08935965600383269369,Bacteria-Pelodictyon\_luteolum\_78187812:0.07967571668026340870)96:0.05145623597652759784)100:0.42660866932889335290)62:0.07482942926906087366)83:0.09174590141764177309,(((Plantae-Chondrus\_crispus\_62994624\_2:0.15014798525792133477,Plantae-Galdieria\_sulphuraria\_Contig443\_1:0.13374503147374863787)48:0.04229841894512781364,(Plantae-Cyanidioschyzon\_merolae\_CML284C:0.04902865835267034705,Plantae-Porphyr\_a\_zezoensis\_Contig1839\_3:0.24326050301007931531)82:0.04485182340421266928)80:0.05967786270720680519,((((Plantae-Porphyr\_a\_zezoensis\_CX874586\_3:0.55276864258209679193,Cyanobacteria-Synechococcus\_sp.\_JA-3-3Ab\_86607013:0.00000121823947223981)31:0.03710182328882509484,Cyanobacteria-Synechococcus\_sp.\_JA-2-3Ba2-13\_86607623:0.00812731792465570466)34:0.20249402386640871776,((((((Cyanobacteria-Prochlorococcus\_marinus\_str\_MIT\_9515\_123965984:0.01250082833838241266,Cyanobacteria-Prochlorococcus\_marinus\_str.\_pastoris\_str\_CCMP1986\_33861233:0.01566136011441973674)56:0.01391098066796059296,(Cyanobacteria-Prochlorococcus\_marinus\_str.\_AS9601\_123968266:0.00000121823947223981,(Cyanobacteria-Prochlorococcus\_marinus\_str\_MIT\_9312\_78779061:0.00616314125394170752,Cyanobacteria-Prochlorococcus\_marinus\_str\_MIT\_9301\_126696067:0.00308172240920981649)41:0.00305644013494659351)78:0.01495435445206058818)100:0.16546408230142201079,((Cyanobacteria-Prochlorococcus\_marinus\_str\_NATL1A\_124025441:0.00000121823947223981,Cyanobacteria-Prochlorococcus\_marinus\_str\_NATL2A\_72381949:0.00000121823947223981)100:0.10667979011433369185,(Cyanobacteria-Prochlorococcus\_marinus\_str.\_CCMP1375\_33240465:0.06120215857275387167,Cyanobacteria-Prochlorococcus\_marinus\_str\_MIT\_9211\_84518151:0.05006621250687218194)89:0.04312445380271118928)89:0.05806601169736672063)90:0.08095861998657805092,(Cyanobacteria-Prochlorococcus\_marinus\_str\_MIT\_9303\_124023138:0.01509119081724520813,Cyanobacteria-Prochlorococcus\_marinus\_str\_MIT\_9313\_33863049:0.01404774731413222302)100:0.05686037925711446422)73:0.04206371620788174059,(((Cyanobacteria-Synechococcus\_sp.\_WH\_8102\_33865708:0.05118547793700545939,Cyanobacteria-Synechococcus\_sp.\_CC9605\_78212828:0.03967866079753849112)66:0.01583802362734687899,(Cyanobacteria-Synechococcus\_sp.\_BL107\_116070627:0.00256447041523655186,Cyanobacteria-Synechococcus\_sp.\_CC9902\_78184752:0.00380965020643024696)100:0.09134205605714458553)66:0.02023619526324405352,((Cyanobacteria-Synechococcus\_sp.\_RS9917\_87125792:0.02898757971199794614,(Cyanobacteria-Synechococcus\_sp.\_RS9916\_116074926:0.03765756303312582653,(Cyanobacteria-Synechococcus\_sp.\_WH\_7803\_148239811:0.00962364140228628463,Cyanobacteria-Synechococcus\_sp.\_WH\_7805\_88808860:0.00958567824122011011)100:0.03804487923913215525)57:0.01011719663113377

736)67:0.01438574443075633924,Cyanobacteria-  
Synechococcus\_sp.\_CC9311\_113952754:0.08134213261532743933)89:0.04103910203926392636)97:0.0716976918705666682  
6)51:0.05426372847852895670,Cyanobacteria-  
Synechococcus\_sp.\_WH\_5701\_87302162:0.05885200921940707958)32:0.02763601470892435366,Cyanobacteria-  
Synechococcus\_sp.\_RCC307\_148242561:0.06879003938813696428)82:0.07652782980612948815)12:0.056646067333917173  
03,(Cyanobacteria-Synechococcus\_elongatus\_PCC\_6301\_56750826:0.00000121823947223981,Cyanobacteria-  
Synechococcus\_elongatus\_PCC\_7942\_81299524:0.00000121823947223981)100:0.08899761277099861589)8:0.039771860609  
50454322,(Cyanobacteria-Lyngbya\_sp.\_PCC\_8106\_119489558:0.05994154545055321859,((Cyanobacteria-  
Synechocystis\_sp.\_PCC\_6803\_16330309:0.08195210875746701540,((Cyanobacteria-  
Nodularia\_spumigena\_CCY9414\_119510040:0.04496207129685535903,Cyanobacteria-  
Nostoc\_punctiforme\_PCC\_73102\_23128723:0.03089236527865393128)54:0.00584873781124384869,(Cyanobacteria-  
Anabaena\_variabilis\_ATCC\_29413\_75906658:0.00627656658702608651,Cyanobacteria-  
Nostoc\_sp.\_PCC\_7120\_17229993:0.00000121823947223981)99:0.03031954302944691801)94:0.04343035746147681786)24:0.  
01259578267913413936,((Cyanobacteria-  
Trichodesmium\_erythraeum\_IMS101\_113477916:0.08433993170096726333,(Cyanobacteria-  
Cyanotheca\_sp.\_CCY0110\_126656414:0.02665380352224306845,Cyanobacteria-  
Crocospaera\_watsonii\_WH\_8501\_67925456:0.04181001157079160258)78:0.01699646392881423024)46:0.007340398990700  
23684,(Cyanobacteria-Thermosynechococcus\_elongatus\_BP-1\_22298539:0.13296427055483051038,Plantae-  
Glaucozystis\_nostochinearum\_106806523\_3:0.21484897294212820795)8:0.02278869229711502284)16:0.01725093441606295  
394)8:0.01330336690769419461)21:0.03231208234013252523)8:0.04510309826262785121,Cyanobacteria-  
Gloeobacter\_violaceus\_PCC\_7421\_37523191:0.32644642363021497689)34:0.03789604543091650707)100:0.36583774757352  
716112,((Bacteria-Syntrophomonas\_wolfei\_114566426:0.47930449432777105789,(Bacteria-  
Clostridium\_perfringens\_110803791:0.38611656778970793180,((Bacteria-  
Parvibaculum\_lavamentivorans\_154252198:0.09800260921238615475,(Bacteria-  
Caulobacter\_crescentus\_16125104:0.16829421847993322747,Bacteria-  
Rhodospirillum\_rubrum\_83592086:0.22283747430117328836)59:0.07305285106755315949)100:0.61427829601914663016,(B  
acteria-Salinibacter\_ruber\_83815534:0.70865835973119362112,(Bacteria-  
Acidothermus\_cellulolyticus\_117928729:0.10035909574907100894,(((Bacteria-  
Corynebacterium\_jeikeium\_68536242:0.17847770177032737382,(Bacteria-  
Saccharopolyspora\_erythraea\_134102436:0.08541974494495729875,((Bacteria-  
Clavibacter\_michiganensis\_148273340:0.19809174495862333365,Bacteria-  
Kineococcus\_radiotolerans\_152965397:0.07233099368914318317)98:0.07692758160738523421,Bacteria-  
Nocardioides\_sp.\_119717426:0.05972321805337812289)84:0.07261754943346392099)51:0.04421643043318894406)59:0.055  
82328987299336326,Bacteria-  
Streptomyces\_avermitilis\_29829103:0.10249089585270312885)21:0.04120568978160127349,Bacteria-  
Frankia\_sp.\_86742254:0.14942232680067296657)47:0.05414361490938043864)100:0.36634761232474905013)60:0.12368297  
031067951308)89:0.2410536797760630560)39:0.06880322623564624762)90:0.24206116233489449741,(Bacteria-  
Thermus\_thermophilus\_46199979:0.35523229935275735247,((Bacteria-  
Deinococcus\_radiodurans\_15805413:0.33268032123583574089,(Bacteria-  
Acidobacteria\_bacterium\_94968451:0.21320640643030258632,Bacteria-  
Solibacter\_usitatus\_116620316:0.23075896407654153397)99:0.14991459622353411896)59:0.06529353560589995498,(Bacteri  
a-Francisella\_tularensis\_134302085:0.37305656666703118640,(((Bacteria-  
Halorhodospira\_halophila\_121996941:0.32916240791267409316,Bacteria-  
Alkalilimnicola\_ehrlichei\_114320617:0.17289104546851008504)94:0.09313922605434513113,((Bacteria-  
Ralstonia\_eutropha\_73541774:0.19053153100629635630,(((Bacteria-  
Comamonas\_testosteroni\_118051079:0.07553910602596915214,Bacteria-  
Delftia\_acidovorans\_118729199:0.05351643322072237308)93:0.07154453282096211175,Bacteria-  
Acidovorax\_avenae\_120610111:0.06168828848110684965)72:0.04785467901566505672,(Bacteria-  
Methylobium\_petrophilum\_124267185:0.19706023807544190141,(Bacteria-  
Polaromonas\_sp.\_91788470:0.05439872155840635992,Bacteria-  
Rhodoferax\_ferrireducens\_89901085:0.10308089234428824410)86:0.05781184976886138277)53:0.02487896382498836281)1  
00:0.17004964986852710851)97:0.10794938925613041525,(Bacteria-  
Azoarcus\_sp.\_56476110:0.1914813151110383363,(Bacteria-  
Chromobacterium\_violaceum\_34498993:0.19371086162575570921,(Bacteria-  
Methylophilales\_bacterium\_118594984:0.46266494375756445079,Bacteria-  
Methylobacillus\_flagellatus\_91775973:0.14952763128249094149)57:0.08163487604207864123)85:0.12897241184964361449)  
22:0.06275621247226215171)12:0.03412026727142673105)22:0.04952418507905636397,(Bacteria-  
Bradyrhizobium\_sp.\_146337679:0.05448555849139453955,(Bacteria-  
Rhodopseudomonas\_palustris\_115522212:0.09725248835324525054,Bacteria-  
Nitrobacter\_hamburgensis\_92116239:0.06117003280112628949)68:0.05872362846406336406)100:0.17802055617071640969,(  
((Bacteria-Aurantimonas\_sp.\_90420294:0.08543272809972661530,Bacteria-  
Fulvimarina\_pelagi\_114707340:0.08435395817842195054)73:0.04440178028079173889,Bacteria-

Brucella\_ovis\_148559689:0.15671599419062792746)93:0.07690714764316959606,Bacteria-  
Stappia\_aggregata\_118592124:0.18055017456633745687)57:0.03806396639497909573)100:0.20754487257301634795)28:0.03  
743112850457501473,Bacteria-  
Xanthomonas\_oryzae\_84623752:0.32749671102976551929)42:0.07191190564878416347)70:0.09481166841912302967)74:0.1  
5350636879076348662)100:1.05262594329142000760)100:0.39232137832954033785)95:0.19276675500180476264)77:0.1291  
8754697508413876)100:0.35557133979250582501)100:0.09742090448055749918)100:0.13687897283332373100)11:0.000001  
21823947223981,Chlamydia-Chlamydomphila\_pneumoniae\_15835906:0.00000121823947223981,Chlamydia-  
Chlamydomphila\_pneumoniae\_16752666:0.00000121823947223981);

Plantae-Physcomitrella\_patens\_60901

((Plantae-Arabidopsis\_thaliana\_15222822:0.23142233338865131342,Plantae-  
Arabidopsis\_thaliana\_18402254:0.01620634124040129867)90:0.08128232690912072511,((Plantae-  
Physcomitrella\_patens\_60901:0.06046854264305581705,Plantae-  
Physcomitrella\_patens\_170499:0.07254883692066838030)100:0.14921903133351160919,((((Bacteria-  
Plesiocystis\_pacifica\_149917403:0.52078135688396576253,(((Chlamydia-  
Chlamydomphila\_pneumoniae\_33242384:0.00000121823947223981,Chlamydia-  
Chlamydomphila\_pneumoniae\_16752011:0.00000121823947223981)24:0.00000121823947223981,Chlamydia-  
Chlamydomphila\_pneumoniae\_15618923:0.00000121823947223981)17:0.00000121823947223981,Chlamydia-  
Chlamydomphila\_pneumoniae\_15836546:0.00000121823947223981)100:0.06982370958396429128,(((Chlamydia-  
Chlamydomphila\_abortus\_62185326:0.02218172281094602308,Chlamydia-  
Chlamydomphila\_caviae\_29840503:0.01852928829827963503)37:0.01648025683109773445,Chlamydia-  
Chlamydomphila\_felis\_89898077:0.02514162191140028105)81:0.06980836231929707369,(Chlamydia-  
Chlamydia\_muridarum\_15834867:0.04758188609304316030,(Chlamydia-  
Chlamydia\_trachomatis\_15605593:0.00597251998002922002,Chlamydia-  
Chlamydia\_trachomatis\_76789604:0.00271110414428906224)100:0.05300098812056019265)100:0.26241623284546033990)7  
4:0.05853940996475638647)100:0.75440197629244087896)34:0.09402793589752059256,((Bacteria-  
Rhodopseudomonas\_palustris\_90423709:0.21172651499493877481,(Bacteria-  
Bradyrhizobium\_sp\_148254401:0.25592518079139153775,(Bacteria-  
Dechloromonas\_aromatica\_71906322:0.16637200869672816306,(Bacteria-  
Geobacter\_uraniumreducens\_148264829:0.15811359524152615585,Bacteria-  
Rhodoferrax\_ferrireducens\_89900927:0.22572115927195515739)77:0.05509046125766407093)60:0.07494261641009009045)4  
7:0.09764239563655169318)100:0.26866463771010712369,((Bacteria-  
unidentified\_eubacterium\_149370019:0.58817965409751471473,Bacteria-  
Flavobacterium\_bacterium\_126663904:0.72642196109272394455)43:0.12721854117099759551,(Bacteria-  
Pseudomonas\_mendocina\_146308547:0.38940560144198116399,(((Bacteria-  
Mycobacterium\_ulcerans\_118618650:0.81579857765893770694,Bacteria-  
Rubrobacter\_xylanophilus\_108803863:0.64413247571358211996)99:0.49476582419196768470,Bacteria-  
Fervidobacterium\_nodosum\_154249049:1.07415314010596651961)100:1.86373903069026858326,(((Bacteria-  
Sulfurovum\_sp\_152993481:0.18008523330296752341,((Bacteria-  
Campylobacter\_conciscus\_157165221:0.23780591160080036262,(Bacteria-  
Nitratiruptor\_sp\_152991083:0.15162927167301420983,Bacteria-  
Caminibacter\_mediatlanticus\_149194571:0.1649817542309793946)100:0.19377067982250439915)61:0.072009707549243046  
07,(Bacteria-Thiomicrospira\_denitrificans\_78776622:0.26115820891636043477,Bacteria-  
Psychromonas\_ingrahamii\_119946307:0.33335524600082300228)32:0.04288630200688065691)76:0.09797273144468586492)  
100:0.43597171430833697725,((Bacteria-Saccharophagus\_degradans\_90019714:0.18360882134675485244,Bacteria-  
alpha\_proteobacterium\_114771503:0.20636317830638964410)79:0.03806969631559006806,(((Bacteria-  
Nitrosococcus\_oceani\_77164983:0.25859812950835914247,Bacteria-  
Mariprofundus\_ferrooxydans\_114778417:0.38277744054823764630)48:0.06717051200601126260,((Bacteria-  
Rhodobacter\_sphaeroides\_126463418:0.40353301037019079223,Bacteria-  
Francisella\_tularensis\_134301219:0.55521179395924968869)46:0.11022693786554209339,((Bacteria-  
Desulfuromonas\_acetoxidans\_95929830:0.15801686392851263530,Bacteria-  
Desulfotalea\_psychrophila\_51244700:0.19242112742750447363)95:0.08487239187584472155,Bacteria-  
Pelobacter\_carbinolicus\_77917729:0.18951716625967168772)93:0.10357132011443084818)11:0.04695171584165250267)25:0  
.07256989183877086969,((Bacteria-Marinobacter\_sp\_126668979:0.29262709256409552561,((Bacteria-  
Photobacterium\_profundum\_90412592:0.11580654197701611974,(Bacteria-  
Vibrio\_vulnificus\_27367593:0.19764837055533107657,Bacteria-  
Vibriionales\_bacterium\_148975285:0.09937258689203960771)68:0.05424571433287446454)100:0.17846759829562183763,(B  
acteria-Moritella\_sp\_149907881:0.23586580417886063299,Bacteria-  
Aeromonas\_salmonicida\_145299494:0.25109792080633019928)31:0.04965705237098005237)81:0.10078206526612015770)8  
7:0.08806719720479307123,(Bacteria-Magnetococcus\_sp\_117926716:0.54069991196257227717,(Bacteria-  
Candidatus\_Ruthia\_118602368:0.30633254273367965803,Bacteria-  
Methylococcus\_capsulatus\_53803617:0.47180509863254732617)61:0.07506912086012415553)35:0.03316750018899106839)3

8:0.07431547884652829616)47:0.11528380396218590453)98:0.44913452739175291351)99:0.57720738910625790652,((Bacteria-Alcanivorax\_borkumensis\_110833099:0.43690115645288041257,Bacteria-Oceanospirillum\_sp.\_89093844:0.45314917059880555072)33:0.05854269300200089232,((Bacteria-Pseudoalteromonas\_tunicata\_88861303:0.18152492069778863870,Bacteria-Alteromonadales\_bacterium\_119472888:0.14790947472480278635)99:0.25299387284841912127,((Bacteria-Oceanobacter\_sp.\_94500402:0.31058174795745491226,Bacteria-Hahella\_chejuensis\_83648420:0.40864672473988283841)96:0.17485780148637497522,Bacteria-Shewanella\_woodyi\_118074216:0.69868604719402860326)56:0.12118324503546314130)20:0.05254801210367582992)100:0.98843381831793353243)62:0.23460353379395398887)100:0.72538875694468751831,Bacteria-Parabacteroides\_merdae\_154494200:0.47938128528617435231)36:0.22049177062390062920)24:0.12542790638772305378)16:0.06862118514759218968)73:0.20448919390438277666)96:0.21891083941495606546,Plantae-Cyanidioschyzon\_merolae\_CMJ093C:0.53795031639902390896)21:0.04307158226877681045,(Plantae-Porphyr\_a\_yezoensis\_AV438891\_3:0.22120412878565220982,(Chromalveolata-Thalassiosira\_pseudonana\_15027:0.08806474120732808719,Chromalveolata-Phaeodactylum\_tricornutum\_42116:0.15139222668502144709)100:0.50488275740176924433)18:0.06189309212395430887)52:0.10209258817549647647,(Plantae-Volvox\_carteri\_57334\_jgi:0.13366023487563716277,Plantae-Chlamydomonas\_reinhardtii\_103745:0.12892680209170481742)100:0.56041094862438167734)89:0.14898779425530545018)87:0.07247589695393578946,Plantae-Oryza\_sativa\_115477946:0.22495630017219797603);

Plantae-Physcomitrella\_patens\_70762

((Chlamydia-Chlamydia\_trachomatis\_76789589:0.00712375847736827078,Chlamydia-Chlamydia\_trachomatis\_15605579:0.00713435697748557567)99:0.02312890158673753388,(((Chlamydia-Chlamydophila\_pneumoniae\_15618909:0.00000121823947223981,Chlamydia-Chlamydophila\_pneumoniae\_16752024:0.00000121823947223981)100:0.00000121823947223981,(Chlamydia-Chlamydophila\_pneumoniae\_15836532:0.00000121823947223981,Chlamydia-Chlamydophila\_pneumoniae\_33242370:0.00000121823947223981)99:0.00000121823947223981)100:0.17078773887528556075,(Chlamydia-Chlamydophila\_felis\_89898061:0.03692771137155841099,(Chlamydia-Chlamydophila\_abortus\_62185341:0.05522878766033753606,Chlamydia-Chlamydophila\_caviae\_29840517:0.01569340449069358753)51:0.01133399993926952759)93:0.06870655664877810265)89:0.07858340560397150676,(((Plantae-Oryza\_sativa\_115468148:0.18514679251026577855,Plantae-Arabidopsis\_thaliana\_15221490:0.09654230636952099154)94:0.25278399867105877385,Plantae-Physcomitrella\_patens\_70762:0.32389702985771628985)61:0.12854420680518033326,(((Chromalveolata-Thalassiosira\_pseudonana\_34714:0.43912264784414084540,Chromalveolata-Phaeodactylum\_tricornutum\_7195:0.45098376669533435379)100:0.34020012204498412123,Plantae-Galdieria\_sulphuraria\_A4\_35D03\_1:0.62093960598232300629)79:0.17996567501071641937,(((Bacteria-Syntrophus\_aciditrophicus\_85857921:0.43578269835554106493,((Bacteria-Dichelobacter\_nodosus\_146329465:0.66655483986009167463,Bacteria-Coxiella\_burnetii\_153207852:0.37520210449481083970)26:0.11680035322764795169,Bacteria-Maricaulis\_maris\_114569170:0.64390440370043366958)1:0.00277726949896890934)10:0.06183941707287197997,(((Bacteria-Ralstonia\_metallidurans\_94310515:0.35135671021306380535,(Bacteria-Chromobacterium\_violaceum\_34498926:0.32209790827484402476,Bacteria-Burkholderia\_phymatum\_118032682:0.36387275326833495859)37:0.08619979796075852296)43:0.05844632553898954780,Bacteria-Polynucleobacter\_sp.\_145589597:0.33262785332709560171)30:0.07500127282399812745,(Bacteria-Polaromonas\_sp.\_91788312:0.28142203428306900026,((Bacteria-Verminephrobacter\_eiseniae\_121609574:0.20426100564648888569,(Bacteria-Delftia\_acidovorans\_118729403:0.21774763396721100173,Bacteria-Comamonas\_testosteroni\_118050608:0.28890330941236486151)83:0.19362587636001352132)27:0.04759214895472174689,Bacteria-Acidovorax\_sp.\_121594624:0.16190054544784085455)20:0.03905286712168044155)29:0.09413641613880813219)53:0.07389922616567703995,((Bacteria-Methylococcus\_capsulatus\_53802428:0.33619192050595508858,Bacteria-Candidatus\_Ruthia\_118602884:0.74149857180890932362)13:0.00000121823947223981,((Bacteria-Haemophilus\_ducreyi\_33152629:0.47274714152181657179,(Bacteria-Thiomicrospira\_crunogena\_78485955:0.39541773062136498229,(Bacteria-Vibrionales\_bacterium\_148981936:0.14003863131422081278,Bacteria-Vibrio\_shilonii\_149190045:0.07266500702686264079)99:0.32370255544198839326,Bacteria-Shewanella\_sediminis\_157376253:0.35860995512896604032)48:0.06098995635875383015)42:0.06842478832652129639)75:0.14659695072940498450,Bacteria-Nitrosococcus\_oceani\_77166061:0.37696047723917197603)17:0.06084502999478938468)13:0.10587974457989959842,Bacteria-Nitrosospira\_multiformis\_82702354:0.39585913429964292298)19:0.07782732605724190789)23:0.15879286063351383262)58:0.07886580565528274189,(((Bacteria-Pelotomaculum\_thermopropionicum\_147676360:0.29705861469541972042,Bacteria-Desulfotomaculum\_reducens\_134297898:0.33327200800141354442)68:0.12849143095139164972,Bacteria-

Carboxydotherrmus\_hydrogenoformans\_78043781:0.31939091971337030262)30:0.13208833670724398623,((Cyanobacteria-Synechococcus\_elongatus\_PCC\_7942\_81300665:0.00000121823947223981,Cyanobacteria-Synechococcus\_elongatus\_PCC\_6301\_56752247:0.00706443503013132884)100:0.35571444532795049032,(Cyanobacteria-Gloeobacter\_violaceus\_PCC\_7421\_37520622:0.36767049470424906232,Cyanobacteria-Nostoc\_punctiforme\_PCC\_73102\_23125821:0.42858588242258410794)58:0.04979753457394767852)100:0.46295655661169249351,(Bacteria-Moorella\_thermoacetica\_83588899:0.41018470524233818786,(Bacteria-Syntrophomonas\_wolfei\_114565589:0.49957778398091606809,Bacteria-Desulfotobacterium\_hafniense\_89892755:0.34346901928164053075)35:0.14226095377430372779)0:0.06556166191185873460)0:0.00000121823947223981)12:0.08182143935842264848,((Bacteria-Anaeromyxobacter\_sp.\_153006601:0.38055921959856842118,(Bacteria-Myxococcus\_xanthus\_108758559:0.12174940263156551479,Bacteria-Stigmatella\_aurantiaca\_115378509:0.12559721540475332624)100:0.27354989132802309815)48:0.12269811195924791580,Bacteria-Collinsella\_aerofaciens\_139439263:0.53613683262220257486)33:0.14674022147181875475)2:0.05687275598083507688)2:0.03552598730631863905,((Bacteria-Thermobifida\_fusca\_72160431:0.28996120406971953587,Bacteria-Streptomyces\_avermitilis\_29830723:0.11728920429337015563)97:0.25331831055003795061,Bacteria-Rubrobacter\_xylanophilus\_108805662:0.55879734020894178403)44:0.13528317526556449257,((Bacteria-Symbiobacterium\_thermophilum\_51891149:0.28819792511792602374,((Bacteria-Flavobacteria\_bacterium\_126662495:0.14611535840769379613,Bacteria-Flavobacterium\_johnsoniae\_146299285:0.10165454553281765004)85:0.14017116105718843699,Bacteria-unidentified\_eubacterium\_149369606:0.11813082138609908023)100:0.71320752952563748472)23:0.08373031768267748254,(((Bacteria-Staphylococcus\_haemolyticus\_70727433:0.38277154854919137605,((Bacteria-Lactobacillus\_casei\_116495716:0.43601170990784315906,(Bacteria-Chlorobium\_chlorochromatii\_78188173:0.61205018231354157976,Bacteria-Thermoanaerobacter\_ethanolicus\_114845498:0.2786296312040241965)41:0.09479797654943034058)50:0.18442921453851976454,(Bacteria-Alkaliphilus\_metalliredigens\_150387879:0.25439789481627000933,Bacteria-Clostridium\_sp.\_106895303:0.23015467999780719888)65:0.07732990460272902433)11:0.05863337307841201551,Bacteria-Ruminococcus\_torques\_153815558:0.53232378078100883734)13:0.11730582955315314864)6:0.04319744551493163998,Bacteria-Bacillus\_sp.\_126652937:0.34091461897315639140)7:0.06495111164459893560,((Bacteria-Pelobacter\_carbinolicus\_77917942:0.30456517337971061865,Bacteria-Desulfuromonas\_acetoxidans\_95928326:0.20103950185442304166)97:0.13256477864988933102,Bacteria-Geobacter\_lovleyi\_118746176:0.52242038792766798405)58:0.11084057572643503387)3:0.08277298270934640989)12:0.06789536538991432224)2:0.00000121823947223981)81:0.14644052271950500077)64:0.12180266468731583418,((Plantae-Ostreococcus\_tauri\_17006:0.23105338938422689821,Plantae-Ostreococcus\_lucimarinus\_37349:0.25135485056432443907)100:0.46519386217121155846,(Plantae-Volvox\_carteri\_89616\_jgi:0.89319994948684955371,Plantae-Chlamydomonas\_reinhardtii\_74200:0.34135246875700619995)94:0.18500592890819073100)56:0.10109568330783454126)39:0.10137131654080058785)76:0.16810628361934396025,Chlamydia-Candidatus\_Proteochlamydia\_46446282:0.50713941511201832135)100:0.33860341104082203323)98:0.10775939973411481632,Chlamydia-Chlamydia\_muridarum\_15834852:0.07072250252742939836);

Plantae-Volvox\_carteri\_99233\_jgi

((((((((Chromalveolata-Phytophthora\_sojae\_136539:2.47734357921934300606,Plantae-Volvox\_carteri\_99233\_jgi:1.72299151547716467014)20:0.18486231265585403860,((Plantae-Arabidopsis\_thaliana\_30684506:0.27520078400377101513,((Plantae-Oryza\_sativa\_115447277:0.27608974889448451018,Plantae-Oryza\_sativa\_115459280:0.25154504452865156239)77:0.21263813651618854172,(Plantae-Physcomitrella\_patens\_60819:0.24674421954783379296,Plantae-Physcomitrella\_patens\_206734:0.26877166202868313372)100:0.72506826998508355775)51:0.17949581629111693859)100:1.20703351491705745957,((Chromalveolata-Thalassiosira\_pseudonana\_16210:0.60356586115904287126,Chromalveolata-Phaeodactylum\_tricornutum\_1199:0.66116577238989449050)100:0.89069287896144944128,Plantae-Physcomitrella\_patens\_186728:3.38768663026300531627)24:0.30126778695810924047)34:0.33424091766775598789)40:0.37042687802281937248,(Opisthokonta-Mus\_musculus\_19527158:0.10581277519521044284,Opisthokonta-Danio\_rerio\_41393121:0.10643345648172930495)100:2.25510436999960850457)82:0.69231184777432774879,Chlamydia-Candidatus\_Proteochlamydia\_46446522:0.19689750236972877739)13:0.02287276113630387631,(((Chlamydia-Candidatus\_Proteochlamydia\_46446910:0.13506234065540967393,(Chlamydia-Candidatus\_Proteochlamydia\_46446916:0.18165382665769688741,Chlamydia-Candidatus\_Proteochlamydia\_46446912:0.15357730047067200130)77:0.06530681735749058192)100:0.17044494493400971780,(Chlamydia-Candidatus\_Proteochlamydia\_46447199:0.64701412675337721669,Chlamydia-Candidatus\_Proteochlamydia\_46447653:0.33830803412825444232)35:0.04554395991943925581)38:0.05691045963658872969,(((Chlamydia-Candidatus\_Proteochlamydia\_46445968:0.45904835089005519011,(Chlamydia-Candidatus\_Proteochlamydia\_46447197:0.26106611295816600782,Chlamydia-



Candidatus\_Proteochlamydia\_46445970:0.15804201117533997478)90:0.05439214628794332429)57:0.05183492450049025785,  
Chlamydia-Candidatus\_Proteochlamydia\_46445969:0.32418430663791752977)39:0.03476718818221369994,(((Chlamydia-  
Candidatus\_Proteochlamydia\_46446906:0.33022791596401546155,Chlamydia-  
Candidatus\_Proteochlamydia\_46446377:0.35364726831957910003)23:0.01982119671265862235,(Chlamydia-  
Candidatus\_Proteochlamydia\_46447144:0.31088149586148106085,Chlamydia-  
Candidatus\_Proteochlamydia\_46447141:0.19814715071798688628)97:0.12959680665018613599)85:0.07324346317715040022,  
(Chlamydia-Candidatus\_Proteochlamydia\_46447283:0.23438279341823270441,Chlamydia-  
Candidatus\_Proteochlamydia\_46445682:0.35423883944037098948)100:0.30039751111057100275)23:0.0167096227811029708  
6)11:0.02166801831017479280,((Chlamydia-Candidatus\_Proteochlamydia\_46447096:0.07920600297229504760,Chlamydia-  
Candidatus\_Proteochlamydia\_46447250:0.04938792991713483738)100:0.50126141587757178097,Chlamydia-  
Candidatus\_Proteochlamydia\_46447142:0.46163667205396624604)50:0.05086296444039087317)32:0.04784643931005619355)  
81:0.09290463035958870797,(Chlamydia-Candidatus\_Proteochlamydia\_46447626:0.30724041708315930066,Chlamydia-  
Candidatus\_Proteochlamydia\_46447300:0.21484415046800092730)78:0.07284836138984859821)24:0.02932660648320882871,  
(Chlamydia-Candidatus\_Proteochlamydia\_46447466:0.32261666050304388387,(Chlamydia-  
Candidatus\_Proteochlamydia\_46445833:0.41178508612405079203,Chlamydia-  
Candidatus\_Proteochlamydia\_46445832:0.12908878079789343207)77:0.05780511454100423219)49:0.05235245792258558239)  
63:0.05553301231000767196)18:0.06635729147638902425,Chlamydia-  
Candidatus\_Proteochlamydia\_46446666:0.26784879167419584078)3:0.02704564776712329449,Chlamydia-  
Candidatus\_Proteochlamydia\_46447549:0.24465357477544452669)8:0.03822534342413851788,(Chlamydia-  
Candidatus\_Proteochlamydia\_46446831:0.25370152777808790967,Chlamydia-  
Candidatus\_Proteochlamydia\_46447588:0.33946947660608595143)15:0.02019233720088338055)3:0.02303880333052050686,((  
(Plantae-Chlamydomonas\_reinhardtii\_153692:4.30049106887062393412,Chlamydia-  
Candidatus\_Proteochlamydia\_46446667:0.26085807904368768506)15:0.05116647563619850653,(Chlamydia-  
Candidatus\_Proteochlamydia\_46446665:0.27202981367340145491,(Chlamydia-  
Candidatus\_Proteochlamydia\_46447554:0.24117207972327328602,Chlamydia-  
Candidatus\_Proteochlamydia\_46446659:0.25323769053458211609)41:0.03126720011166277124)15:0.03313787506069293398)  
1:0.03459364223657935417,(((Chlamydia-Candidatus\_Proteochlamydia\_46447548:0.20307020502974928999,Chlamydia-  
Candidatus\_Proteochlamydia\_46446776:0.17455482324273871586)92:0.08676045925611673704,((Chlamydia-  
Candidatus\_Proteochlamydia\_46447589:0.27449372145409595136,(Chlamydia-  
Candidatus\_Proteochlamydia\_46446626:0.20582206884481382692,(Chlamydia-  
Candidatus\_Proteochlamydia\_46447552:0.28786227814473519526,Chlamydia-  
Candidatus\_Proteochlamydia\_46447562:0.27996507480153459690)33:0.04980004664011779270)19:0.02558840729476399498)  
13:0.02863445087802663283,((Chlamydia-Candidatus\_Proteochlamydia\_46447550:0.34407108785901002745,Chlamydia-  
Candidatus\_Proteochlamydia\_46447560:0.22673053511522997527)73:0.05942003061114255885,(Chlamydia-  
Candidatus\_Proteochlamydia\_46446627:0.50002834539289853222,Chlamydia-  
Candidatus\_Proteochlamydia\_46447569:0.31342511418916463306)18:0.04612390141665463628)19:0.04774625364942158834)  
1:0.03401050750737850958)9:0.01244367603769516196,(Chlamydia-  
Candidatus\_Proteochlamydia\_46447568:0.36802829580268520138,Chlamydia-  
Candidatus\_Proteochlamydia\_46447590:0.32498470248237132374)16:0.03779034844894482714)7:0.03181303577587088482)0  
:0.01063523007309752182,Chlamydia-Candidatus\_Proteochlamydia\_46447129:0.27538478965770235574);
