# Supplementary material for: Chlamydiae Has Contributed at Least 55 Genes to Plantae with Predominantly Plastid Functions
Source: PubMed Central journal article supplement (PMC2376095; doi:10.1371/journal.pone.0002205), 2008-05-21
Supplement: pone.0002205.s003.pdf [file pone.0002205.s003.pdf]

Table S3. Complete set of taxa present in our local genome database that was used to search for chlamydial genes in Plantae.

|    |                                              |
|----|----------------------------------------------|
| 1  | 1 Amoebozoa-Acanthamoeba castellanii         |
| 2  | 2 Amoebozoa-Dictyostelium discoideum         |
| 3  | 3 Amoebozoa-Entamoeba histolytica            |
| 4  | 4 Amoebozoa-Hartmannella vermiformis         |
| 5  | 1 Chromalveolata-Alexandrium tamarense       |
| 6  | 2 Chromalveolata-Aureococcus anophagefferens |
| 7  | 3 Chromalveolata-Emiliania huxleyi           |
| 8  | 4 Chromalveolata-Guillardia theta            |
| 9  | 5 Chromalveolata-Isochrysis galbana          |
| 10 | 6 Chromalveolata-Karenia brevis              |
| 11 | 7 Chromalveolata-Laminaria digitata          |
| 12 | 8 Chromalveolata-Paramecium tetraurelia      |
| 13 | 9 Chromalveolata-Pavlova lutheri             |
| 14 | 10 Chromalveolata-Phaeodactylum tricornutum  |
| 15 | 11 Chromalveolata-Phytophthora sojae         |
| 16 | 12 Chromalveolata-Plasmodium falciparum      |
| 17 | 13 Chromalveolata-Tetrahymena thermophila    |
| 18 | 14 Chromalveolata-Thalassiosira pseudonana   |
| 19 | 15 Chromalveolata-Toxoplasma gondii          |
| 20 | 1 Excavata-Euglena gracilis                  |
| 21 | 2 Excavata-Giardia lamblia                   |
| 22 | 3 Excavata-Jakoba bahamiensis                |
| 23 | 4 Excavata-Jakoba libera                     |
| 24 | 5 Excavata-Leishmania major                  |
| 25 | 6 Excavata-Malawimonas californiana          |
| 26 | 7 Excavata-Malawimonas jakobiformis          |
| 27 | 8 Excavata-Naegleria gruberi                 |
| 28 | 9 Excavata-Trichomonas vaginalis             |
| 29 | 10 Excavata-Trypanosoma brucei               |
| 30 | 11 Excavata-Trypanosoma cruzi                |
| 31 | 1 Opisthokonta-Apis mellifera                |
| 32 | 2 Opisthokonta-Cryptococcus neoformans       |
| 33 | 3 Opisthokonta-Danio rerio                   |
| 34 | 4 Opisthokonta-Drosophila melanogaster       |
| 35 | 5 Opisthokonta-Magnaporthe grisea            |
| 36 | 6 Opisthokonta-Mus musculus                  |
| 37 | 7 Opisthokonta-Saccharomyces cerevisiae      |
| 38 | 8 Opisthokonta-Schizosaccharomyces pombe     |
| 39 | 9 Opisthokonta-Sporobolomyces roseus         |
| 40 | 10 Opisthokonta-Ustilago maydis              |
| 41 | 1 Plantae-Arabidopsis thaliana               |
| 42 | 2 Plantae-Chlamydomonas reinhardtii          |
| 43 | 3 Plantae-Chondrus crispus                   |
| 44 | 4 Plantae-Cyanidioschyzon merolae            |
| 45 | 5 Plantae-Cyanophora paradoxa                |
| 46 | 6 Plantae-Galdieria sulphuraria              |
| 47 | 7 Plantae-Glaucocystis nostochinearum        |

|    |                                                  |
|----|--------------------------------------------------|
| 48 | 8 Plantae-Gracilaria changii                     |
| 49 | 9 Plantae-Oryza sativa                           |
| 50 | 10 Plantae-Ostreococcus lucimarinus              |
| 51 | 11 Plantae-Ostreococcus tauri                    |
| 52 | 12 Plantae-Physcomitrella patens                 |
| 53 | 13 Plantae-Porphyra yezoensis                    |
| 54 | 14 Plantae-Volvox carteri                        |
| 55 | 1 Rhizaria-Bigelowiella natans                   |
| 56 | 2 Rhizaria-Reticulomyxa filosa                   |
| 57 | 1 Chlamydia-Candidatus Protochlamydia            |
| 58 | 2 Chlamydia-Chlamydia muridarum                  |
| 59 | 3 Chlamydia-Chlamydia trachomatis                |
| 60 | 4 Chlamydia-Chlamydophila abortus                |
| 61 | 5 Chlamydia-Chlamydophila caviae                 |
| 62 | 6 Chlamydia-Chlamydophila felis                  |
| 63 | 7 Chlamydia-Chlamydophila pneumoniae             |
| 64 | 8 Chlamydia-Chlamydophila psittaci               |
| 65 | 1 Cyanobacteria-Anabaena variabilis              |
| 66 | 2 Cyanobacteria-Crocospaera watsonii             |
| 67 | 3 Cyanobacteria-Cyanothece sp.                   |
| 68 | 4 Cyanobacteria-Gloeobacter violaceus            |
| 69 | 5 Cyanobacteria-Leptolyngbya foveolarum          |
| 70 | 6 Cyanobacteria-Leptolyngbya sp.                 |
| 71 | 7 Cyanobacteria-Leptolyngbya valderiana          |
| 72 | 8 Cyanobacteria-Lyngbya sp.                      |
| 73 | 9 Cyanobacteria-Microcystis aeruginosa           |
| 74 | 10 Cyanobacteria-Nodularia spumigena             |
| 75 | 11 Cyanobacteria-Nostoc punctiforme              |
| 76 | 12 Cyanobacteria-Nostoc sp.                      |
| 77 | 13 Cyanobacteria-Prochlorococcus marinus         |
| 78 | 14 Cyanobacteria-Synechococcus elongatus         |
| 79 | 15 Cyanobacteria-Synechococcus sp.               |
| 80 | 16 Cyanobacteria-Synechocystis sp.               |
| 81 | 17 Cyanobacteria-Thermosynechococcus elongatus   |
| 82 | 18 Cyanobacteria-Trichodesmium erythraeum        |
| 83 | 1 Bacteria-Acetobacter aceti                     |
| 84 | 2 Bacteria-Achromobacter xylosoxidans            |
| 85 | 3 Bacteria-Acidiphilium cryptum                  |
| 86 | 4 Bacteria-Acidiphilium multivorum               |
| 87 | 5 Bacteria-Acidithiobacillus caldus              |
| 88 | 6 Bacteria-Acidithiobacillus ferrooxidans        |
| 89 | 7 Bacteria-Acidobacteria bacterium               |
| 90 | 8 Bacteria-Acidothermus cellulosyticus           |
| 91 | 9 Bacteria-Acidovorax avenae                     |
| 92 | 10 Bacteria-Acidovorax sp.                       |
| 93 | 11 Bacteria-Acinetobacter baumannii              |
| 94 | 12 Bacteria-Actinobacillus actinomycetemcomitans |

|     |                                             |
|-----|---------------------------------------------|
| 95  | 13 Bacteria-Actinobacillus pleuropneumoniae |
| 96  | 14 Bacteria-Actinobacillus porcitosillarum  |
| 97  | 15 Bacteria-Actinobacillus succinogenes     |
| 98  | 16 Bacteria-Actinomyces odontolyticus       |
| 99  | 17 Bacteria-Aeromonas bestiarum             |
| 100 | 18 Bacteria-Aeromonas hydrophila            |
| 101 | 19 Bacteria-Aeromonas punctata              |
| 102 | 20 Bacteria-Aeromonas salmonicida           |
| 103 | 21 Bacteria-Agrobacterium tumefaciens       |
| 104 | 22 Bacteria-Alcanivorax borkumensis         |
| 105 | 23 Bacteria-Algoriphagus sp.                |
| 106 | 24 Bacteria-Alkalilimnicola ehrlichei       |
| 107 | 25 Bacteria-Alkaliphilus metalliredigens    |
| 108 | 26 Bacteria-alpha proteobacterium           |
| 109 | 27 Bacteria-Alteromonadales bacterium       |
| 110 | 28 Bacteria-Anaeromyxobacter dehalogenans   |
| 111 | 29 Bacteria-Anaeromyxobacter sp.            |
| 112 | 30 Bacteria-Anaplasma marginale             |
| 113 | 31 Bacteria-Anaplasma phagocytophilum       |
| 114 | 32 Bacteria-Aquifex aeolicus                |
| 115 | 33 Bacteria-Arcanobacterium pyogenes        |
| 116 | 34 Bacteria-Arcobacter butzleri             |
| 117 | 35 Bacteria-Arthrobacter aurescens          |
| 118 | 36 Bacteria-Arthrobacter nitroguajacolicus  |
| 119 | 37 Bacteria-Arthrobacter sp.                |
| 120 | 38 Bacteria-Aster yellows                   |
| 121 | 39 Bacteria-Aurantimonas sp.                |
| 122 | 40 Bacteria-Avibacterium paragallinarum     |
| 123 | 41 Bacteria-Azoarcus sp.                    |
| 124 | 42 Bacteria-Bacillus amyloliquefaciens      |
| 125 | 43 Bacteria-Bacillus anthracis              |
| 126 | 44 Bacteria-Bacillus cereus                 |
| 127 | 45 Bacteria-Bacillus coagulans              |
| 128 | 46 Bacteria-Bacillus licheniformis          |
| 129 | 47 Bacteria-Bacillus megaterium             |
| 130 | 48 Bacteria-Bacillus methanolicus           |
| 131 | 49 Bacteria-Bacillus mycoides               |
| 132 | 50 Bacteria-Bacillus pumilus                |
| 133 | 51 Bacteria-Bacillus sp.                    |
| 134 | 52 Bacteria-Bacillus subtilis               |
| 135 | 53 Bacteria-Bacillus thuringiensis          |
| 136 | 54 Bacteria-Bacillus weihenstephanensis     |
| 137 | 55 Bacteria-Bacteroides caccae              |
| 138 | 56 Bacteria-Bacteroides capillosus          |
| 139 | 57 Bacteria-Bacteroides fragilis            |
| 140 | 58 Bacteria-Bacteroides thetaiotaomicron    |
| 141 | 59 Bacteria-Bacteroides vulgatus            |

|     |                                                  |
|-----|--------------------------------------------------|
| 142 | 60 Bacteria-Bartonella bacilliformis             |
| 143 | 61 Bacteria-Bartonella grahamii                  |
| 144 | 62 Bacteria-Baumannia cicadellinicola            |
| 145 | 63 Bacteria-Bdellovibrio bacteriovorus           |
| 146 | 64 Bacteria-Beet leafhopper                      |
| 147 | 65 Bacteria-Beggiatoa sp.                        |
| 148 | 66 Bacteria-Bifidobacterium adolescentis         |
| 149 | 67 Bacteria-Bifidobacterium breve                |
| 150 | 68 Bacteria-Bifidobacterium longum               |
| 151 | 69 Bacteria-Bifidobacterium pseudocatenulatum    |
| 152 | 70 Bacteria-Bordetella bronchiseptica            |
| 153 | 71 Bacteria-Bordetella pertussis                 |
| 154 | 72 Bacteria-Borrelia afzelii                     |
| 155 | 73 Bacteria-Borrelia burgdorferi                 |
| 156 | 74 Bacteria-Borrelia duttonii                    |
| 157 | 75 Bacteria-Borrelia garinii                     |
| 158 | 76 Bacteria-Bradyrhizobium japonicum             |
| 159 | 77 Bacteria-Bradyrhizobium sp.                   |
| 160 | 78 Bacteria-Brucella ovis                        |
| 161 | 79 Bacteria-Buchnera aphidicola                  |
| 162 | 80 Bacteria-Burkholderia ambifaria               |
| 163 | 81 Bacteria-Burkholderia cenocepacia             |
| 164 | 82 Bacteria-Burkholderia cepacia                 |
| 165 | 83 Bacteria-Burkholderia mallei                  |
| 166 | 84 Bacteria-Burkholderia multivorans             |
| 167 | 85 Bacteria-Burkholderia phymatum                |
| 168 | 86 Bacteria-Burkholderia phytofirmans            |
| 169 | 87 Bacteria-Burkholderia pseudomallei            |
| 170 | 88 Bacteria-Burkholderia sp.                     |
| 171 | 89 Bacteria-Burkholderia vietnamiensis           |
| 172 | 90 Bacteria-Burkholderia xenovorans              |
| 173 | 91 Bacteria-Butyrivibrio fibrisolvens            |
| 174 | 92 Bacteria-Caldicellulosiruptor saccharolyticus |
| 175 | 93 Bacteria-Caminibacter mediatlanticus          |
| 176 | 94 Bacteria-Campylobacter coli                   |
| 177 | 95 Bacteria-Campylobacter concisus               |
| 178 | 96 Bacteria-Campylobacter curvus                 |
| 179 | 97 Bacteria-Campylobacter fetus                  |
| 180 | 98 Bacteria-Campylobacter hominis                |
| 181 | 99 Bacteria-Campylobacter jejuni                 |
| 182 | 100 Bacteria-Campylobacter lari                  |
| 183 | 101 Bacteria-candidate division                  |
| 184 | 102 Bacteria-Candidatus Blochmannia              |
| 185 | 103 Bacteria-Candidatus Carsonella               |
| 186 | 104 Bacteria-Candidatus Desulfococcus            |
| 187 | 105 Bacteria-Candidatus Pelagibacter             |
| 188 | 106 Bacteria-Candidatus Ruthia                   |

|     |                                                 |
|-----|-------------------------------------------------|
| 189 | 107 Bacteria-Candidatus Sulcia                  |
| 190 | 108 Bacteria-Candidatus Vesicomysocius          |
| 191 | 109 Bacteria-Carboxydotherrnus hydrogenoformans |
| 192 | 110 Bacteria-Caulobacter crescentus             |
| 193 | 111 Bacteria-Caulobacter sp.                    |
| 194 | 112 Bacteria-Chlorobium chlorochromatii         |
| 195 | 113 Bacteria-Chlorobium ferrooxidans            |
| 196 | 114 Bacteria-Chlorobium limicola                |
| 197 | 115 Bacteria-Chlorobium phaeobacteroides        |
| 198 | 116 Bacteria-Chloroflexus aggregans             |
| 199 | 117 Bacteria-Chromobacterium violaceum          |
| 200 | 118 Bacteria-Chromohalobacter salexigens        |
| 201 | 119 Bacteria-Citrobacter koseri                 |
| 202 | 120 Bacteria-Clavibacter michiganensis          |
| 203 | 121 Bacteria-Clostridium acetobutylicum         |
| 204 | 122 Bacteria-Clostridium beijerinckii           |
| 205 | 123 Bacteria-Clostridium botulinum              |
| 206 | 124 Bacteria-Clostridium cellulolyticum         |
| 207 | 125 Bacteria-Clostridium difficile              |
| 208 | 126 Bacteria-Clostridium kluveri                |
| 209 | 127 Bacteria-Clostridium novyi                  |
| 210 | 128 Bacteria-Clostridium perfringens            |
| 211 | 129 Bacteria-Clostridium phytofermentans        |
| 212 | 130 Bacteria-Clostridium sp.                    |
| 213 | 131 Bacteria-Clostridium tetani                 |
| 214 | 132 Bacteria-Clostridium thermocellum           |
| 215 | 133 Bacteria-Collinsella aerofaciens            |
| 216 | 134 Bacteria-Comamonas testosteroni             |
| 217 | 135 Bacteria-Corynebacterium diphtheriae        |
| 218 | 136 Bacteria-Corynebacterium glutamicum         |
| 219 | 137 Bacteria-Corynebacterium jeikeium           |
| 220 | 138 Bacteria-Corynebacterium renale             |
| 221 | 139 Bacteria-Corynebacterium sp.                |
| 222 | 140 Bacteria-Corynebacterium striatum           |
| 223 | 141 Bacteria-Coxiella burnetii                  |
| 224 | 142 Bacteria-Cytophaga hutchinsonii             |
| 225 | 143 Bacteria-Dechloromonas aromatica            |
| 226 | 144 Bacteria-Dehalococcoides ethenogenes        |
| 227 | 145 Bacteria-Dehalococcoides sp.                |
| 228 | 146 Bacteria-Deinococcus geothermalis           |
| 229 | 147 Bacteria-Deinococcus radiodurans            |
| 230 | 148 Bacteria-Delftia acidovorans                |
| 231 | 149 Bacteria-delta proteobacterium              |
| 232 | 150 Bacteria-Desulfitobacterium hafniense       |
| 233 | 151 Bacteria-Desulfotalea psychrophila          |
| 234 | 152 Bacteria-Desulfotomaculum reducens          |
| 235 | 153 Bacteria-Desulfovibrio desulfuricans        |

|     |                                              |
|-----|----------------------------------------------|
| 236 | 154 Bacteria-Desulfovibrio vulgaris          |
| 237 | 155 Bacteria-Desulfuromonas acetoxidans      |
| 238 | 156 Bacteria-Dichelobacter nodosus           |
| 239 | 157 Bacteria-Dinoroseobacter shibae          |
| 240 | 158 Bacteria-Dorea longicatena               |
| 241 | 159 Bacteria-Edwardsiella ictaluri           |
| 242 | 160 Bacteria-Ehrlichia canis                 |
| 243 | 161 Bacteria-Ehrlichia chaffeensis           |
| 244 | 162 Bacteria-Ehrlichia ruminantium           |
| 245 | 163 Bacteria-Enterobacter aerogenes          |
| 246 | 164 Bacteria-Enterobacteria phage            |
| 247 | 165 Bacteria-Enterobacter sakazakii          |
| 248 | 166 Bacteria-Enterobacter sp.                |
| 249 | 167 Bacteria-Enterococcus faecalis           |
| 250 | 168 Bacteria-Enterococcus faecium            |
| 251 | 169 Bacteria-Erwinia sp.                     |
| 252 | 170 Bacteria-Erysipelothrix rhusiopathiae    |
| 253 | 171 Bacteria-Erythrobacter litoralis         |
| 254 | 172 Bacteria-Erythrobacter sp.               |
| 255 | 173 Bacteria-Escherichia coli                |
| 256 | 174 Bacteria-Escherichia sp.                 |
| 257 | 175 Bacteria-Eubacterium ventriosum          |
| 258 | 176 Bacteria-Feravidobacterium nodosum       |
| 259 | 177 Bacteria-Flavobacteria bacterium         |
| 260 | 178 Bacteria-Flavobacterium johnsoniae       |
| 261 | 179 Bacteria-Flavobacterium psychrophilum    |
| 262 | 180 Bacteria-Francisella tularensis          |
| 263 | 181 Bacteria-Frankia alni                    |
| 264 | 182 Bacteria-Frankia sp.                     |
| 265 | 183 Bacteria-Fulvimarina pelagi              |
| 266 | 184 Bacteria-Fusobacterium nucleatum         |
| 267 | 185 Bacteria-Geobacillus thermodenitrificans |
| 268 | 186 Bacteria-Geobacter bemidjiensis          |
| 269 | 187 Bacteria-Geobacter lovleyi               |
| 270 | 188 Bacteria-Geobacter metallireducens       |
| 271 | 189 Bacteria-Geobacter sp.                   |
| 272 | 190 Bacteria-Geobacter uraniumreducens       |
| 273 | 191 Bacteria-Gluconobacter oxydans           |
| 274 | 192 Bacteria-Gramella forsetii               |
| 275 | 193 Bacteria-Granulibacter bethesdensis      |
| 276 | 194 Bacteria-Haemophilus ducreyi             |
| 277 | 195 Bacteria-Haemophilus influenzae          |
| 278 | 196 Bacteria-Haemophilus parasuis            |
| 279 | 197 Bacteria-Haemophilus somnus              |
| 280 | 198 Bacteria-Hafnia alvei                    |
| 281 | 199 Bacteria-Hahella chejuensis              |
| 282 | 200 Bacteria-Halorhodospira halophila        |

283 201 Bacteria-Halothermothrix orenii  
284 202 Bacteria-Helicobacter acinonychis  
285 203 Bacteria-Helicobacter pylori  
286 204 Bacteria-Herminiimonas arsenicoxydans  
287 205 Bacteria-Herpetosiphon aurantiacus  
288 206 Bacteria-Histophilus somni  
289 207 Bacteria-Hydrogenobaculum sp.  
290 208 Bacteria-Hyphomonas neptunium  
291 209 Bacteria-Jannaschia sp.  
292 210 Bacteria-Janthinobacterium sp.  
293 211 Bacteria-Kineococcus radiotolerans  
294 212 Bacteria-Klebsiella pneumoniae  
295 213 Bacteria-Lactobacillus acidophilus  
296 214 Bacteria-Lactobacillus brevis  
297 215 Bacteria-Lactobacillus casei  
298 216 Bacteria-Lactobacillus delbrueckii  
299 217 Bacteria-Lactobacillus fermentum  
300 218 Bacteria-Lactobacillus gasseri  
301 219 Bacteria-Lactobacillus johnsonii  
302 220 Bacteria-Lactobacillus plantarum  
303 221 Bacteria-Lactobacillus reuteri  
304 222 Bacteria-Lactobacillus sakei  
305 223 Bacteria-Lactobacillus salivarius  
306 224 Bacteria-Lactococcus lactis  
307 225 Bacteria-Lawsonia intracellularis  
308 226 Bacteria-Legionella pneumophila  
309 227 Bacteria-Leifsonia xyli  
310 228 Bacteria-Leptospira borgpetersenii  
311 229 Bacteria-Leptospira interrogans  
312 230 Bacteria-Leptospirillum ferrooxidans  
313 231 Bacteria-Leuconostoc citreum  
314 232 Bacteria-Leuconostoc mesenteroides  
315 233 Bacteria-Limnobacter sp.  
316 234 Bacteria-Listeria monocytogenes  
317 235 Bacteria-Listeria welshimeri  
318 236 Bacteria-Listonella anguillarum  
319 237 Bacteria-Magnetococcus sp.  
320 238 Bacteria-Magnetospirillum gryphiswaldense  
321 239 Bacteria-Magnetospirillum magneticum  
322 240 Bacteria-Maricaulis maris  
323 241 Bacteria-marine actinobacterium  
324 242 Bacteria-marine gamma  
325 243 Bacteria-Marinobacter algicola  
326 244 Bacteria-Marinobacter aquaeolei  
327 245 Bacteria-Marinobacter sp.  
328 246 Bacteria-Marinococcus halophilus  
329 247 Bacteria-Marinomonas sp.

330 248 Bacteria-Mariprofundus ferrooxydans  
331 249 Bacteria-Mesorhizobium loti  
332 250 Bacteria-Mesorhizobium sp.  
333 251 Bacteria-Methylibium petroleiphilum  
334 252 Bacteria-Methylobacillus flagellatus  
335 253 Bacteria-Methylobacterium chloromethanicum  
336 254 Bacteria-Methylobacterium extorquens  
337 255 Bacteria-Methylobacterium sp.  
338 256 Bacteria-Methylococcus capsulatus  
339 257 Bacteria-Methylophilales bacterium  
340 258 Bacteria-Micromonospora rosaria  
341 259 Bacteria-Microscilla marina  
342 260 Bacteria-Moorella thermoacetica  
343 261 Bacteria-Moraxella sp.  
344 262 Bacteria-Moritella sp.  
345 263 Bacteria-Mycobacterium avium  
346 264 Bacteria-Mycobacterium bovis  
347 265 Bacteria-Mycobacterium gilvum  
348 266 Bacteria-Mycobacterium smegmatis  
349 267 Bacteria-Mycobacterium sp.  
350 268 Bacteria-Mycobacterium tuberculosis  
351 269 Bacteria-Mycobacterium ulcerans  
352 270 Bacteria-Mycobacterium vanbaalenii  
353 271 Bacteria-Mycoplasma agalactiae  
354 272 Bacteria-Mycoplasma capricolum  
355 273 Bacteria-Mycoplasma genitalium  
356 274 Bacteria-Mycoplasma mobile  
357 275 Bacteria-Mycoplasma mycoides  
358 276 Bacteria-Mycoplasma penetrans  
359 277 Bacteria-Mycoplasma pulmonis  
360 278 Bacteria-Mycoplasma sp.  
361 279 Bacteria-Mycoplasma synoviae  
362 280 Bacteria-Myxococcus xanthus  
363 281 Bacteria-Neisseria meningitidis  
364 282 Bacteria-Neorickettsia sennetsu  
365 283 Bacteria-Nitratiruptor sp.  
366 284 Bacteria-Nitrobacter hamburgensis  
367 285 Bacteria-Nitrobacter winogradskyi  
368 286 Bacteria-Nitrosococcus oceani  
369 287 Bacteria-Nitrosomonas europaea  
370 288 Bacteria-Nitrosomonas eutropha  
371 289 Bacteria-Nitrosospira multiformis  
372 290 Bacteria-Nocardioides sp.  
373 291 Bacteria-Novosphingobium aromaticivorans  
374 292 Bacteria-Oceanicola granulosus  
375 293 Bacteria-Oceanobacter sp.  
376 294 Bacteria-Oceanospirillum sp.



377 295 Bacteria-Ochrobactrum anthropi  
378 296 Bacteria-Oenococcus oeni  
379 297 Bacteria-Orientia tsutsugamushi  
380 298 Bacteria-Pantoea citrea  
381 299 Bacteria-Parabacteroides distasonis  
382 300 Bacteria-Parabacteroides merdae  
383 301 Bacteria-Paracoccus denitrificans  
384 302 Bacteria-Paracoccus methylutens  
385 303 Bacteria-Paracoccus pantotrophus  
386 304 Bacteria-Parvibaculum lavamentivorans  
387 305 Bacteria-Pasteurella multocida  
388 306 Bacteria-Pasteurella trehalosi  
389 307 Bacteria-Pediococcus acidilactici  
390 308 Bacteria-Pediococcus pentosaceus  
391 309 Bacteria-Pedobacter sp.  
392 310 Bacteria-Pelobacter carbinolicus  
393 311 Bacteria-Pelobacter propionicus  
394 312 Bacteria-Pelodictyon luteolum  
395 313 Bacteria-Pelotomaculum thermopropionicum  
396 314 Bacteria-Petrotoga mobilis  
397 315 Bacteria-Photobacterium damsela  
398 316 Bacteria-Photobacterium profundum  
399 317 Bacteria-Photobacterium sp.  
400 318 Bacteria-Plesiocystis pacifica  
401 319 Bacteria-Polaromonas naphthalenivorans  
402 320 Bacteria-Polaromonas sp.  
403 321 Bacteria-Polynucleobacter sp.  
404 322 Bacteria-Propionibacterium acidipropionici  
405 323 Bacteria-Propionibacterium acnes  
406 324 Bacteria-Prosthecochloris vibrioformis  
407 325 Bacteria-Proteus vulgaris  
408 326 Bacteria-Pseudoalteromonas atlantica  
409 327 Bacteria-Pseudoalteromonas sp.  
410 328 Bacteria-Pseudoalteromonas tunicata  
411 329 Bacteria-Pseudomonas aeruginosa  
412 330 Bacteria-Pseudomonas alcaligenes  
413 331 Bacteria-Pseudomonas entomophila  
414 332 Bacteria-Pseudomonas fluorescens  
415 333 Bacteria-Pseudomonas fulva  
416 334 Bacteria-Pseudomonas mendocina  
417 335 Bacteria-Pseudomonas putida  
418 336 Bacteria-Pseudomonas resinovorans  
419 337 Bacteria-Pseudomonas sp.  
420 338 Bacteria-Pseudomonas stutzeri  
421 339 Bacteria-Pseudomonas syringae  
422 340 Bacteria-Psychrobacter cryohalolentis  
423 341 Bacteria-Psychrobacter sp.

424 342 Bacteria-Psychroflexus torquis  
425 343 Bacteria-Psychromonas ingrahamii  
426 344 Bacteria-Psychromonas sp.  
427 345 Bacteria-Rahnella sp.  
428 346 Bacteria-Ralstonia eutropha  
429 347 Bacteria-Ralstonia metallidurans  
430 348 Bacteria-Ralstonia pickettii  
431 349 Bacteria-Ralstonia solanacearum  
432 350 Bacteria-Rhizobium etli  
433 351 Bacteria-Rhizobium leguminosarum  
434 352 Bacteria-Rhizobium sp.  
435 353 Bacteria-Rhodobacterales bacterium  
436 354 Bacteria-Rhodobacter blasticus  
437 355 Bacteria-Rhodobacter sphaeroides  
438 356 Bacteria-Rhodococcus erythropolis  
439 357 Bacteria-Rhodococcus opacus  
440 358 Bacteria-Rhodococcus rhodochrous  
441 359 Bacteria-Rhodococcus sp.  
442 360 Bacteria-Rhodoferax ferrireducens  
443 361 Bacteria-Rhodopseudomonas palustris  
444 362 Bacteria-Rhodospirillum rubrum  
445 363 Bacteria-Rhodothermus marinus  
446 364 Bacteria-Rickettsia akari  
447 365 Bacteria-Rickettsia bellii  
448 366 Bacteria-Rickettsia canadensis  
449 367 Bacteria-Rickettsia conorii  
450 368 Bacteria-Rickettsia felis  
451 369 Bacteria-Rickettsia massiliae  
452 370 Bacteria-Rickettsia rickettsii  
453 371 Bacteria-Rickettsia typhi  
454 372 Bacteria-Rickettsiella grylli  
455 373 Bacteria-Roseiflexus castenholzii  
456 374 Bacteria-Roseiflexus sp.  
457 375 Bacteria-Roseobacter denitrificans  
458 376 Bacteria-Roseobacter sp.  
459 377 Bacteria-Roseovarius sp.  
460 378 Bacteria-Rubrobacter xylanophilus  
461 379 Bacteria-Ruegeria sp.  
462 380 Bacteria-Ruminococcus flavefaciens  
463 381 Bacteria-Ruminococcus gnavus  
464 382 Bacteria-Ruminococcus obeum  
465 383 Bacteria-Ruminococcus torques  
466 384 Bacteria-Saccharophagus degradans  
467 385 Bacteria-Saccharopolyspora erythraea  
468 386 Bacteria-Sagittula stellata  
469 387 Bacteria-Salinibacter ruber  
470 388 Bacteria-Salinispora arenicola

471 389 Bacteria-Salinispora tropica  
472 390 Bacteria-Salmonella choleraesuis  
473 391 Bacteria-Salmonella enterica  
474 392 Bacteria-Salmonella enteritidis  
475 393 Bacteria-Salmonella phage  
476 394 Bacteria-Salmonella typhi  
477 395 Bacteria-Salmonella typhimurium  
478 396 Bacteria-Selenomonas ruminantium  
479 397 Bacteria-Serratia entomophila  
480 398 Bacteria-Serratia marcescens  
481 399 Bacteria-Serratia proteamaculans  
482 400 Bacteria-Shewanella amazonensis  
483 401 Bacteria-Shewanella baltica  
484 402 Bacteria-Shewanella denitrificans  
485 403 Bacteria-Shewanella frigidimarina  
486 404 Bacteria-Shewanella loihica  
487 405 Bacteria-Shewanella oneidensis  
488 406 Bacteria-Shewanella pealeana  
489 407 Bacteria-Shewanella putrefaciens  
490 408 Bacteria-Shewanella sediminis  
491 409 Bacteria-Shewanella sp.  
492 410 Bacteria-Shewanella woodyi  
493 411 Bacteria-Shigella boydii  
494 412 Bacteria-Shigella dysenteriae  
495 413 Bacteria-Shigella flexneri  
496 414 Bacteria-Shigella sonnei  
497 415 Bacteria-Silicibacter sp.  
498 416 Bacteria-Sinorhizobium medicae  
499 417 Bacteria-Sodalis glossinidius  
500 418 Bacteria-Solibacter usitatus  
501 419 Bacteria-Sphingobium yanoikuyae  
502 420 Bacteria-Sphingomonas sp.  
503 421 Bacteria-Sphingomonas wittichii  
504 422 Bacteria-Sphingopyxis alaskensis  
505 423 Bacteria-Spiroplasma citri  
506 424 Bacteria-Spiroplasma kunkelii  
507 425 Bacteria-Staphylococcus aureus  
508 426 Bacteria-Staphylococcus chromogenes  
509 427 Bacteria-Staphylococcus epidermidis  
510 428 Bacteria-Staphylococcus haemolyticus  
511 429 Bacteria-Staphylococcus lugdunensis  
512 430 Bacteria-Staphylococcus saprophyticus  
513 431 Bacteria-Staphylococcus simulans  
514 432 Bacteria-Staphylococcus sp.  
515 433 Bacteria-Staphylococcus warneri  
516 434 Bacteria-Stappia aggregata  
517 435 Bacteria-Stenotrophomonas maltophilia

|     |                                                          |
|-----|----------------------------------------------------------|
| 518 | 436 Bacteria-Stigmatella aurantiaca                      |
| 519 | 437 Bacteria-Streptococcus agalactiae                    |
| 520 | 438 Bacteria-Streptococcus gordonii                      |
| 521 | 439 Bacteria-Streptococcus mutans                        |
| 522 | 440 Bacteria-Streptococcus phage                         |
| 523 | 441 Bacteria-Streptococcus pneumoniae                    |
| 524 | 442 Bacteria-Streptococcus pyogenes                      |
| 525 | 443 Bacteria-Streptococcus sanguinis                     |
| 526 | 444 Bacteria-Streptococcus suis                          |
| 527 | 445 Bacteria-Streptococcus thermophilus                  |
| 528 | 446 Bacteria-Streptomyces avermitilis                    |
| 529 | 447 Bacteria-Streptomyces clavuligerus                   |
| 530 | 448 Bacteria-Streptomyces coelicolor                     |
| 531 | 449 Bacteria-Streptomyces ghanaensis                     |
| 532 | 450 Bacteria-Streptomyces laurentii                      |
| 533 | 451 Bacteria-Streptomyces natalensis                     |
| 534 | 452 Bacteria-Streptomyces phaeochromogenes               |
| 535 | 453 Bacteria-Streptomyces rochei                         |
| 536 | 454 Bacteria-Streptomyces sp.                            |
| 537 | 455 Bacteria-Streptomyces venezuelae                     |
| 538 | 456 Bacteria-Streptomyces violaceoruber                  |
| 539 | 457 Bacteria-Sulfurovum sp.                              |
| 540 | 458 Bacteria-Symbiobacterium thermophilum                |
| 541 | 459 Bacteria-Syntrophobacter fumaroxidans                |
| 542 | 460 Bacteria-Syntrophomonas wolfei                       |
| 543 | 461 Bacteria-Syntrophus aciditrophicus                   |
| 544 | 462 Bacteria-Thermoanaerobacter ethanolicus              |
| 545 | 463 Bacteria-Thermoanaerobacterium thermosaccharolyticum |
| 546 | 464 Bacteria-Thermobifida fusca                          |
| 547 | 465 Bacteria-Thermosinus carboxydivorans                 |
| 548 | 466 Bacteria-Thermosiphon melanesiensis                  |
| 549 | 467 Bacteria-Thermotoga lettingae                        |
| 550 | 468 Bacteria-Thermotoga petrophila                       |
| 551 | 469 Bacteria-Thermus thermophilus                        |
| 552 | 470 Bacteria-Thiomicrospira crunogena                    |
| 553 | 471 Bacteria-Thiomicrospira denitrificans                |
| 554 | 472 Bacteria-Treponema denticola                         |
| 555 | 473 Bacteria-Tropheryma whipplei                         |
| 556 | 474 Bacteria-uncultured bacterium                        |
| 557 | 475 Bacteria-unidentified eubacterium                    |
| 558 | 476 Bacteria-Verminephrobacter eiseniae                  |
| 559 | 477 Bacteria-Vibrio alginolyticus                        |
| 560 | 478 Bacteria-Vibrio angustum                             |
| 561 | 479 Bacteria-Vibrio cholerae                             |
| 562 | 480 Bacteria-Vibrio fischeri                             |
| 563 | 481 Bacteria-Vibrio harveyi                              |
| 564 | 482 Bacteria-Vibrionales bacterium                       |

565 483 Bacteria-Vibrio parahaemolyticus  
566 484 Bacteria-Vibrio shilonii  
567 485 Bacteria-Vibrio sp.  
568 486 Bacteria-Vibrio vulnificus  
569 487 Bacteria-Weissella cibaria  
570 488 Bacteria-Wolbachia endosymbiont  
571 489 Bacteria-Wolinella succinogenes  
572 490 Bacteria-Xanthobacter autotrophicus  
573 491 Bacteria-Xanthomonas campestris  
574 492 Bacteria-Xanthomonas citri  
575 493 Bacteria-Xanthomonas euvesicatoria  
576 494 Bacteria-Xanthomonas oryzae  
577 495 Bacteria-Xylella fastidiosa  
578 496 Bacteria-Yersinia enterocolitica  
579 497 Bacteria-Yersinia pestis  
580 498 Bacteria-Yersinia pseudotuberculosis  
581 499 Bacteria-Yersinia ruckeri  
582 500 Bacteria-Zymomonas mobilis
